# Supplementary material for: Genome-Scale Modeling of the Protein Secretory Machinery in Yeast
Source: PLoS One. 2013 May 7;8(5):e63284. doi: 10.1371/journal.pone.0063284 (PMC3646752; doi:10.1371/journal.pone.0063284)
Supplement: Table S3 — Yeast and human secretory classes. This table provides the detailedinformation about the yeast and human populated secretory classes with the SGD and UniProt ID for members for each class. (XLSX) [file pone.0063284.s007.xlsx]

## Sheet: Sheet1
Table S3 -Yeast and Human secretory classes
	Secretory calss	Localization	Transmembrane domain	GPI	Disulfde bound	O-linked glycosylation	N-linked glycosylation	Signal peptide	#member in Yeast	#member in Human	SGD ID	Human protein UniProt ID		PTM distribution on secretory classes
Signal peptide (+)	6	CM	1	0	1	1	1	1	0	2	,	,P08571,P13987,			N-linked glycosylation	O-linked glycosylation	Disulfide bound	GPI	Transmembrane	total
	19	CM	1	0	0	1	1	1	0	6	,	,P51693,P02724,P16150,Q9NZ53,P23471,P18827,		yeast signal peptide (+)	20	4	12	8	13	57
	26	CM	1	0	1	0	1	1	5	13	,S000000054,S000001267,S000001231,S000002739,S000003892,	,Q9P2B2,Q9HAT1,Q9H0V9,Q12907,Q9P2V4,Q6UVY6,Q969N2,Q9UBV2,Q9BYH1,P08842,O15455,Q96JJ7,O15533,		human signal peptide(+)	24	13	18	9	18	82
	32	CM	1	0	1	0	1	1	1	884	,S000004047,	,P30375,P30443,P30376,P01892,P30377,P04439,P30378,P13749,P13746,P30447,P05534,P18462,P30450,P30512,P16188,P16189,P10314,P16190,P30453,P30455,P30456,P30457,P01891,P30459,Q09160,P30379,P30380,P30381,P30382,P01889,P30460,P30461,P30462,P30464,P30466,P03989,P30685,P18463,Q95365,P30475,Q04826,P30479,P30480,P30481,P30483,P30484,P30485,P30486,P30487,P30488,P18464,P30490,P30491,P30492,P30493,P30495,P18465…		yeast signal peptide (-)	4	0	0	1	9	14
	33	CM	0	1	1	0	1	1	2	87	,S000004924,S000004335,	,Q10588,O95971,Q64444,P48283,P14384,P10810,P09326,O55186,P51447,P46657,Q28216,Q28785,O62680,O77541,P27274,P40199,Q14002,P31997,P0CG37,P26992,O88507,Q02246,Q9P232,Q8IWV2,O94779,Q9UQ52,P20827,O43921,P52797,O08545,O08542,P52803,O75015,P22146,P56159,P55259,Q12891,P38567,P38568,Q8WWA0,Q13449,O95867,Q16553,O94772,Q8NFP4,Q7Z553,Q9R0S3,P04934,Q9BZM6,Q9BZM5,Q9BZM4,Q13508,Q93070,Q7Z3B1,Q9Y2I2,Q96CW9,Q9P121…		human signal peptide(-)	14	7	14	3	19	57
	45	CM	1	0	0	0	1	1	62	510	,S000002828,S000003246,S000001402,S000004077,S000000665,S000004662,S000001853,S000004204,S000001703,S000005908,S000005343,S000005911,S000004974,S000005974,S000001347,S000005235,S000004324,S000005342,S000001194,S000000742,S000004074,S000003375,S000005534,S000005680,S000006097,S000005782,S000005465,S000001020,S000000657,S000002365,S000004405,S000004964,S000004978,S000005892,S000000610,S000003531,S0…	,Q70Z44,P36896,P37023,Q04771,Q9UM73,P26442,Q16671,Q9BXJ7,Q8J025,Q8NCL9,Q13145,Q6UWJ8,Q5SY80,Q96HA4,P54289,Q9NY47,Q6PHS9,Q8IZS8,Q7Z3S7,Q9Y6N8,P55287,P55289,P55291,O75309,O88338,Q12864,Q13634,Q9H159,Q9HBT6,Q9UJ99,Q9H251,Q86UP0,Q8IXH8,P19022,P22223,P55283,P33151,P55285,Q9ULB5,P55286,Q9ULB4,Q5VU97,P41180,Q86V40,P42787,O75976,O89001,F5H4A9,Q96A33,Q99467,P28906,Q96JP9,Q6ZTQ4,A6H8M9,Q9HBB8,Q7Z692,P40198…
	46	CM	0	1	0	0	1	1	22	47	,S000001529,S000002669,S000004851,S000000282,S000000084,S000005492,S000002551,S000004610,S000005371,S000002462,S000000553,S000002930,S000002144,S000087203,S000028739,S000001257,S000003707,S000004184,S000004110,S000004111,S000001478,	,P21589,P55290,Q9WTR5,Q6YHK3,Q8N6Q3,P25063,Q28896,P31358,P32763,P06731,Q1EAR5,P54197,Q8J0P4,P38248,P15328,P14207,Q05685,P54826,O00451,O60609,Q8N2G4,Q6UXB3,O95274,Q91YK8,Q6UWN0,Q6UWN5,P50498,Q13421,P23515,P09487,P05186,Q86UN3,Q96B86,Q6NW40,Q6ZVN8,Q8N7M5,Q5BIV9,O43280,Q9BY14,O95497,Q9Z0K8,O95498,Q9NY84,Q9QZ25,O43895,Q6UX82,P46992,
	59	CM	0	1	1	1	0	1	0	2	,	,O95868,Q9Z1Q3,		Protien distribution on secretory compartments
	58	CM	1	0	1	1	0	1	0	2	,	,P15943,Q9HCU0,			ER	Golgi	Vacuole	Cell membrane	Extracellular	total
	71	CM	1	0	0	1	0	1	0	7	,	,Q9BUR5,Q28913,P06028,Q86YL7,Q86WI1,P34741,P31431,		yeast signal peptide (+)	143	70	46	237	73	569
	84	CM	1	0	1	0	0	1	0	51	,	,Q8WXA8,Q06481,O00238,P36898,P07766,P20963,A8K4G0,Q0V8S9,Q9NYJ7,Q5PIQ0,P61550,O60667,P30273,Q8SPW1,P20491,P51841,O95976,P0C6B7,Q86SU0,Q92537,Q8NHJ6,Q9HCJ2,P50281,P53690,Q10739,Q9Y5R2,Q96FE7,O60894,O60279,Q8IYR6,Q8WZ59,O14669,Q9BZD6,Q9H3N1,Q9H1E5,Q9NP84,Q9BX59,O14763,Q86YW5,Q95J79,O43914,O54885,F5HAM0,Q68396,P24084,O57254,P24083,Q9JF44,Q9Y279,Q5VU13,A6NLU5,		human signal peptide(+)	185	41	42	1747	2569	4584
	85	CM	0	1	1	0	0	1	0	5	,	,P22748,Q14210,Q9BZG9,Q9NPA2,Q8TDM5,		yeast signal peptide (-)	116	33	69	319	36	573
	97	CM	1	0	0	0	0	1	144	126	,S000000619,S000002103,S000003363,S000004667,S000002684,S000000987,S000000623,S000002440,S000006353,S000004594,S000001534,S000006013,S000003258,S000001036,S000005138,S000005227,S000001843,S000004010,S000001808,S000000246,S000004930,S000002774,S000001908,S000006405,S000001832,S000001702,S000003935,S000005556,S000002683,S000003867,S000000244,S000000947,S000005997,S000006110,S000003574,S000003630,S0…	,Q8NER5,A6NF34,Q6UXE8,A1AIE8,Q5PK67,Q6DBW9,Q8TCZ2,Q8BIF0,Q8R1R5,Q96PB1,Q6UX34,Q8WV48,P14209,Q5TF21,Q5T292,Q8IYJ0,Q95K74,Q4KMG9,Q96S66,Q9NPA0,Q9EP72,Q8N2U0,Q4L979,Q8NEA5,Q9BQ49,O75264,Q4G0I0,A6NGZ8,Q96J86,Q8VIH7,Q19T08,Q15884,Q5JX71,Q5JX69,Q9NYL4,Q14802,Q61835,P59646,Q96DB9,Q9H0Q3,P58550,P48060,Q28914,P15421,Q28915,P0C6Z3,P03196,P0C6Z4,O09800,Q86539,Q06094,P52547,P52366,Q65ZG0,P0C764,Q8WXG9,Q9UBK5…		human signal peptide(+)	485	218	154	4113	535	5505
	98	CM	0	1	0	0	0	1	3	5	,S000001168,S000005266,S000005977,	,O88310,Q8NI32,Q496H8,Q9NPD7,Q86UN2,
	28	ER	0	0	1	0	1	1	4	22	,S000004599,S000005814,S000002464,S000000548,	,Q96L12,Q9D9Q6,P27797,Q06814,Q8VCT4,Q9BT09,P49184,P14625,Q96HE7,Q8R180,Q86YB8,Q9V3A6,P23141,O00748,Q6UWW8,Q6BAA4,Q99784,Q13438,Q13087,Q8NBK3,Q8NBJ7,Q9UI38,
	39	ER	1	0	0	0	1	1	44	40	,S000001461,S000004056,S000000604,S000004993,S000000314,S000006148,S000000664,S000001143,S000000240,S000002995,S000000550,S000001152,S000006142,S000000049,S000003107,S000003598,S000004511,S000004197,S000001121,S000004669,S000003006,S000003539,S000000728,S000000557,S000004813,S000003495,S000005309,S000000375,S000000663,S000003728,S000004957,S000004583,S000006295,S000002757,S000004078,S000002842,S0…	,O94985,Q9NZJ5,O75460,Q9Z2E3,Q86UL3,Q6UWM7,Q86UE6,Q14703,Q5JRA6,Q14165,Q969V3,Q5JPE7,Q8TBF5,P40967,O43567,Q68DV7,A6RBY1,Q1DNE5,P04843,P04844,P43307,P43308,Q9P246,Q9NYK1,Q9NR96,Q9EQU3,Q7Z7H5,Q8WW62,Q9Y3B3,Q9BVK6,Q9HAW8,P22309,P35503,P22310,P35504,P19224,Q9HAW7,Q9HAW9,O60656,O75631,
	41	ER	0	0	0	0	1	1	9	61	,S000002712,S000002926,S000000433,S000002629,S000005863,S000001556,S000001247,S000005391,S000002463,	,P30533,O43852,Q9UBS4,Q9BZQ6,O75356,Q96DZ1,Q96AY3,Q61576,Q9NWM8,Q9Y680,O95302,Q8IWF2,O95479,Q14697,Q8N2G8,Q28034,P14314,Q8NBJ5,Q8IYK4,Q5T4B2,Q9Y4L1,Q63617,Q6UW63,Q7Z4H8,Q14696,Q9UNW1,Q9Z2L6,O35217,Q9H488,Q9Y2G5,Q32P28,Q8IVL5,Q8IVL6,Q8CG70,Q10576,P13674,O15460,Q60716,Q7Z4N8,Q6W3F0,Q6W3E9,Q8N807,Q95LM0,Q8NBL1,P0CP79,P0CP78,P23284,Q15293,O93434,Q96D15,P50454,Q9H173,Q8IWU6,Q8IWU5,O14656,O14657,Q9H497…
	78	ER	1	0	1	0	0	1	2	9	,S000006241,S000004481,	,P27824,P35564,P35565,O14967,P52194,Q92643,P49257,P51571,Q62186,
	80	ER	0	0	1	0	0	1	1	11	,S000005448,	,P29413,Q9Y2B0,Q9BS26,P07237,P38657,P30101,P13667,Q14554,Q15084,O95881,Q8NBS9,
	91	ER	1	0	0	0	0	1	76	16	,S000001637,S000004894,S000005611,S000004757,S000000640,S000003770,S000004519,S000005313,S000005163,S000004451,S000000405,S000002819,S000005618,S000001690,S000002822,S000000846,S000028423,S000003022,S000004532,S000000040,S000004396,S000002988,S000003110,S000003774,S000002845,S000000447,S000005373,S000001352,S000003879,S000005570,S000001938,S000002613,S000005363,S000003633,S000004730,S000004887,S0…	,Q15392,Q96KC8,Q76MJ5,Q06136,Q8N4V1,P39656,O54734,Q6UWI4,A0PJX4,Q8N114,Q86TM6,Q9Y3Q3,Q9Y3A6,P0CN73,P0CN72,Q13454,
	93	ER	0	0	0	0	0	1	9	26	,S000002927,S000006139,S000003571,S000003609,S000004827,S000006131,S000002700,S000004568,S000006128,	,Q96HY6,Q9BPW9,Q27968,Q13217,Q91YW3,Q96DN0,P81623,P30040,P0CP97,P0CP96,P26885,P45878,P32472,P11021,P48723,O35162,Q8NI22,Q9H8H3,Q8BU85,P55157,Q14257,Q6NUM9,Q9HCN8,Q9ESP1,Q8WWX9,O60613,
	5	GL	0	0	1	1	1	1	0	30		,P05067,Q16790,O95196,Q71M36,Q9ERQ6,P80370,P07359,P01589,Q9BZV3,P08514,P11279,P13473,Q99087,Q99088,P01130,Q14114,Q99102,Q8JZM8,Q8N2Q7,Q99K10,O14786,Q14242,P35054,P07204,P15306,P98155,P78423,Q05996,P21754,Q12836,
	29	GL	1	0	1	0	1	1	1	6	,S000005182,	,P06340,P13765,P09958,P22897,Q9UK23,Q8BJ48,
	31	GL	0	0	1	0	1	1	0	3	,	,O60494,O14792,O35310,
	42	GL	1	0	0	0	1	1	24	24	,S000004781,S000000768,S000005847,S000003836,S000003171,S000002891,S000006363,S000005625,S000001769,S000000803,S000000219,S000003226,S000001276,S000006283,S000002864,S000001522,S000004073,S000000113,S000001435,S000003758,S000001009,S000003675,S000001224,S000004502,	,P06480,P13293,Q92896,Q8NFM7,A6QX86,C5P635,O74702,C4JTD3,Q8TBQ9,Q16549,Q96FM1,Q8TCT7,Q24JP5,Q8N3G9,Q9UK28,P49755,O35587,Q63584,Q90515,Q9BXS4,P36344,A6QWZ2,C5P311,C4JI06,
	44	GL	0	0	0	0	1	1	1	1	,S000003722,	,P51690,
	70	GL	0	0	0	1	0	1	0	2	,	,Q9UHG2,Q8WZA1,
	81	GL	1	0	1	0	0	1	2	0	,S000004070,S000001846,	,
	94	GL	1	0	0	0	0	1	11	4	,S000003719,S000000915,S000005605,S000004906,S000002775,S000002911,S000006167,S000003541,S000001517,S000002507,S000003805,	,Q9NRX6,Q9P2E8,Q99805,Q5T9L3,
	96	GL	0	0	0	0	0	1	1	1	,S000005615,	,Q02818,
	21	VC	1	0	0	1	1	1	0	1	,	,Q04900,
	36	VC	0	0	1	0	1	1	4	0	S000006044, S000001174,S000006075,S000004912,S000000786
	34	VC	1	0	1	0	1	1	0	2	,	,P11717,P11117,
	47	VC	1	0	0	0	1	1	18	6	,S000001070,S000004290,S000003974,S000005927,S000002860,S000001607,S000005745,S000004999,S000003338,S000003991,S000003708,S000002212,S000004024,S000000497,S000000574,S000001813,S000005489,S000000445,	,Q8N357,Q9UQV4,P20645,Q8WWB7,Q8NBJ9,O15321,
	49	VC	0	0	0	0	1	1	3	32	,S000001245,S000006230,S000000490,	,P54802,P51689,Q96EG1,Q13510,A5A6P2,Q9TRY9,P23780,P08236,O75503,Q01459,Q8WZ79,P04066,P54803,P54818,P34059,P15586,P13723,Q9Y251,P22304,P35475,Q99538,O89017,P38571,O00462,Q8K2I4,Q02083,Q99519,O35657,Q8NCC3,Q9UHG3,Q9HAT2,P51688,
	99	VC	1	0	0	0	0	1	23	0	,S000003595,S000001420,S000000185,S000000921,S000001350,S000000365,S000002692,S000004834,S000000411,S000000391,S000005421,S000005270,S000002281,S000028508,S000000753,S000006155,S000002339,S000002760,S000004480,S000005344,S000005379,S000006083,S000001658,	,
	101	VC	0	0	0	0	0	1	4	1	,S000002168,S000002204,S000002670,S000005161,	,Q96S96,
	11	EX	0	1	1	1	1	1	1	0	,S000003764,	,
	12	EX	0	0	1	1	1	1	0	68	,	,P02750,P02760,P02749,Q9BXN1,O95972,P02745,P31720,P19835,P51500,P01233,P07434,P02452,P12111,Q02388,P39060,P01189,P04141,P01587,O94907,P01588,P07865,Q99645,P00742,P98140,P00748,P08709,P00740,Q58L96,P12763,P02765,P07589,P02751,P01217,P02790,P05155,P46685,P05113,P48093,P19827,P19823,Q14624,Q5FBW2,Q5FBW1,P01042,P04180,P20774,P98160,P16112,P21810,P07585,P06868,P00747,P06867,P27918,P22891,P04278,Q14515…
	24	EX	0	1	0	1	1	1	1	2	,S000004100,	,P35052,O75487,
	25	EX	0	0	0	1	1	1	1	17	,S000003694,	,P02649,P02458,Q99715,Q05707,P51654,A5A6P7,P78333,Q17R60,Q8R1W8,P05154,P10451,P08721,P02812,Q04118,P21815,P01374,P61125,
	38	EX	0	0	1	0	1	1	1	804	,S000001277,	,P27091,P02763,P19652,Q2KJF1,P04217,Q9EPH1,P08697,P01023,A8K2U0,P19801,P22303,P21836,Q5BLY5,O15204,P43652,O89020,Q8JIV9,O00468,P19121,P02768,O18873,Q95182,O18874,O02380,Q5VFH6,P04745,P04746,O95841,Q9UKU9,Q9Y5C1,Q9BY76,Q86XS5,Q8NI99,O43827,Q15389,O15123,Q9Y264,P01008,P28039,O35298,O18823,P04114,P05090,Q01339,O95445,Q5T4W7,P42127,Q8N6G6,Q86TH1,P82987,Q6ZMM2,Q9H324,P58397,Q76LX8,Q8WXS8,Q8TE58,Q8TE57…
	50	EX	0	1	0	0	1	1	23	1	,S000006429,S000003421,S000000766,S000005271,S000000685,S000002942,S000005909,S000001810,S000001254,S000000059,S000004828,S000005390,S000005515,S000001458,S000004608,S000002484,S000000952,S000001273,S000005535,S000005244,S000004030,S000004032,S000005740,	,Q17RY6,
	51	EX	0	0	0	0	1	1	22	408	,S000000641,S000001424,S000005716,S000002779,S000000366,S000028529,S000005916,S000001385,S000003514,S000005350,S000004291,S000004921,S000003511,S000005773,S000005010,S000000297,S000005104,S000004145,S000004147,S000004148,S000004150,S000004276,	,P07758,P22599,Q00896,Q00897,Q00898,P01009,P12725,P21064,P33854,P01011,Q9JI02,Q8TE99,Q5NDL2,Q8NAT1,P79017,Q26456,P49273,P35858,Q9TSZ0,P01019,Q9GLN8,P02647,P55056,Q13790,O14791,P50635,E0D877,P54793,Q5FYB1,Q5FYB0,Q6UWY0,Q92484,Q92485,Q6UY14,P54962,Q8N8U9,Q96DR5,Q9BQP9,Q8TDL5,Q8N4F0,P59826,P59827,Q8NFQ5,Q8NFQ6,A6NE02,P43251,Q9BXJ1,Q9BXI9,Q5TEV5,Q7Z2R9,O75493,O70354,Q95203,Q8N8R5,P08185,P50451,A5A6K7…
	64	EX	0	0	1	1	0	1	0	32	,	,Q15848,P02747,P15169,P51671,P48298,Q16627,P13501,O15335,P10645,P02461,Q14055,Q9NQ79,P09919,Q9GZV9,Q14512,O70514,P09945,P24593,P24592,P01563,P01344,P46649,P60568,P68291,P68290,P05451,P48304,P05060,P13609,P05452,Q08629,Q9BQ16,
	76	EX	0	1	0	1	0	1	0	1	,	,Q8N158,
	77	EX	0	0	0	1	0	1	0	12	,	,P02656,Q9GJU3,P0C862,P07498,P02453,P28481,Q9XYR5,Q96DR8,A1E959,Q9UHG2,P04280,P02810,
	89	EX	0	1	1	0	0	1	1	0	,S000005327,	,
	90	EX	0	0	1	0	0	1	0	697	,	,P05408,A5A6J6,P01165,P81115,P81116,Q6P093,Q7Z4H4,C9JUS6,P35318,Q8AYA5,Q8AYA4,Q8AYA3,Q9DEA2,Q9DEA1,O00253,O60022,P02769,P49822,P49064,P35747,P02770,Q84ZX5,Q28133,Q00855,P49278,Q9TZZ2,P80384,Q965E2,P22952,P25403,P25404,O24006,P19961,P16859,P16860,P23582,Q61839,P01160,P05125,P01161,P03950,Q7Z1K3,P59704,P02652,Q5GQ85,P83886,B3VZU0,Q8SPW0,Q15582,Q56EB1,Q56EB0,Q2KIV9,P02746,P14106,P31721,P31722,P58811…
	102	EX	0	1	0	0	0	1	11	1	,S000001579,S000001956,S000003911,S000003912,S000001186,S000005910,S000003614,S000006051,S000000271,S000000813,S000005536,	,Q9Y625,
	103	EX	0	0	0	0	0	1	15	526	,S000003074,S000004203,S000004027,S000001646,S000003696,S000003695,S000003710,S000000505,S000028698,S000006325,S000028535,S000002207,S000001647,S000002996,S000001099,S000002439,	,Q6UXT9,Q7M747,Q03383,Q8NEB7,Q86TW2,Q9BRR6,Q1E8D2,P0CW95,O95994,O88312,Q8TD06,Q8NCW5,Q9BT30,P18153,O01949,O60024,Q9U1G2,P79085,Q5EZC5,Q5EZ82,Q9NP70,Q99217,Q99218,Q6UX39,P84715,P61109,Q9TUI9,Q9ULZ1,P0CF78,P0CE37,P0CE39,P0CE38,P34929,P0CE40,P68292,P18656,P09813,Q8MIQ5,P06727,P02651,Q6Q788,Q8C7G5,P02654,P19034,P02655,P18658,P19035,P18659,P18650,Q9BPW4,Q6UXV4,B3A0N5,P15879,Q9H1Z8,Q99LS0,Q13072,Q86Y30…
	185	EX	0	0	0	0	0	1	131	285	,S000003000,S000002396,S000004298,S000004299,S000005413,S000000218,S000004864,S000004094,S000006108,S000003057,S000001015,S000002950,S000003230,S000001038,S000001438,S000001480,S000001707,S000003948,S000003987,S000004944,S000003759,S000005359,S000000073,S000002142,S000007592,S000003914,S000000296,S000000094,S000001258,S000002182,S000003615,S000001721,S000005663,S000001181,S000004240,S000006084,S0…	,Q9XFM4,P22282,P22283,P19361,P04403,P01089,P13492,P20848,P10323,P00785,A5HII1,Q8A6L0,Q42656,P11218,P29064,Q9KWN0,P43237,P43238,Q17282,O42799,P22861,Q06527,Q2M3V2,P08519,Q9C0K3,P54958,P50289,Q6HA08,Q6HA09,P68445,Q9QJ10,P13497,P98069,Q86WA6,O23791,Q8CG16,P00736,P09871,P21041,Q8IW45,P56202,P0CP77,P0CP76,Q63111,Q9BXW7,P09093,P08861,A4D0V7,Q1E3R8,C5P230,P00794,Q6PSU2,Q647G9,P28784,P95493,Q01957,Q01958…	*without localization
signal peptide (-)	108	CM	1	0	1	1	1	0	0	11	,	,Q16853,P25930,P56498,P61073,P70658,P56491,P04233,Q9P283,Q9GLD3,Q9MYZ3,P02786,
	118	CM	1	0	0	1	1	0	0	6	,	,Q9NR71,Q91XT9,O15431,P04921,Q96PE5,Q7M750,
	128	CM	1	0	1	0	1	0	0	931	,	,P10316,Q9N297,P08908,Q9N298,Q9N296,Q9N2B7,P28222,P60020,P49144,P28221,P49145,P28566,Q9N2B6,O08890,P30939,Q9N2D9,P30940,P28223,P50128,P50129,Q5R4Q6,P41595,P28335,Q13639,P47898,P34969,P32305,P30542,P29274,P29275,Q8JG70,Q8JG69,P33765,O95477,P41233,P78363,Q8IZY2,Q91V24,Q9UNQ0,Q7TMS5,Q16515,P78348,Q9UHC3,Q96FT7,Q9NY37,P11229,P08172,Q9N2A3,P20309,Q9N2A4,Q9N2A2,P08483,P08173,P08912,P08911,P35348,P35368…
	129	CM	0	1	1	0	1	0	0	1	,	,Q9GMT4,
	138	CM	1	0	0	0	1	0	78	877	,S000005560,S000004584,S000002390,S000004345,S000003273,S000000242,S000006328,S000001035,S000004923,S000004037,S000005709,S000000695,S000003045,S000001883,S000005516,S000001136,S000004613,S000002753,S000001134,S000001138,S000002751,S000002750,S000003750,S000003755,S000002905,S000005463,S000005267,S000003521,S000001704,S000005479,S000005833,S000005824,S000001811,S000000621,S000003748,S000006398,S0…	,Q15758,Q9BZC7,P41234,Q8N139,O94911,Q8IUA7,Q86UK0,O95342,Q09428,O60706,Q96J66,Q9H172,Q9H222,Q9H221,Q96SE0,Q7L211,Q01718,P25100,P23944,Q5VUY2,Q08828,Q08462,O60266,Q8NFM4,O95622,O43306,P51828,P40145,O60503,Q07075,P79098,P79171,P15144,Q6Q4G3,Q5XXA6,Q9NQ90,Q9BYT9,Q32M45,Q8C5H1,Q4KMQ2,A1A5B4,P35414,Q9WV08,Q9JHG3,Q9HDC9,Q53RT3,Q8NBQ7,P29972,P55087,P55064,O94778,Q6ICH7,Q9HD20,Q4VNC0,P04920,Q96Q91,P02730…
	148	CM	1	0	1	1	0	0	0	9	,	,Q9TV43,Q9BGN6,P56493,P51681,P51682,P68269,P01375,P48094,Q8HZD9,
	168	CM	1	0	1	0	0	0	0	88	,	,P50406,Q9N2A7,P18089,P30545,Q91ZW7,P79175,P79188,P79240,P79234,P46092,P51677,P51685,P11836,P60033,Q5VYJ5,P0C7M8,O15247,O95833,O15165,P49238,P17302,P29033,A1AAA8,Q5PCR9,A1AFW3,Q5PMU6,Q8TDT2,P32249,Q8NDV2,Q8BZA7,Q96P69,Q8TDS4,P49019,Q71H61,A4D1S0,Q5T700,Q3SXY7,Q86X29,Q3U435,Q13585,O88495,Q28558,Q9H195,P60201,O95665,Q9H208,Q8NH80,Q8NGN4,O60404,P0C629,Q8NGA8,Q9H339,Q8NGF3,A6NGY5,Q9H343,Q8NGK5,Q8NH56…
	178	CM	1	0	0	0	0	0	243	2190	,S000000603,S000000530,S000000336,S000001839,S000002960,S000004552,S000005214,S000005490,S000001844,S000005009,S000001032,S000002500,S000000968,S000000757,S000004772,S000002447,S000002446,S000002445,S000005285,S000002792,S000000499,S000005537,S000003456,S000000272,S000002453,S000005339,S000005219,S000000789,S000003449,S000002590,S000004301,S000003389,S000005136,S000000227,S000003232,S000005280,S0…	,Q9NS82,A1AGD4,Q5PJT8,A1AGD3,Q5PJT9,A1AGD5,Q5PJT7,A1AF47,Q5PEN7,Q99758,Q8WWZ4,Q86UQ4,Q5SSE9,Q2M3G0,Q9NSE7,Q64343,Q8N2K0,Q24093,P08910,Q8WU67,Q9BV23,O95870,A1AIQ8,Q5PJ05,Q7Z695,Q96D53,Q3MIX3,Q0VDE8,Q96A54,Q86V24,Q96IZ2,Q5I7T1,Q4L7S0,Q9NVV5,Q9H553,Q6P6C2,C6KTB7,Q9ZJD1,Q7Z5J8,P58368,Q9HCJ1,P58369,P58367,Q86XL3,Q9NW15,Q9HCE9,Q86W74,Q76K24,Q8WW43,Q96LR9,Q8IVJ8,Q8IXF9,A6NM10,Q96PS8,A6NL99,O14520,O43315…
	124	ER	1	0	1	0	1	0	0	12	,	,P22760,Q9NZ08,Q6P179,Q7Z2K6,Q92935,Q9UBQ6,O43909,O75900,P32906,P57727,Q8K1T0,P38435,
	134	ER	1	0	0	0	1	0	27	119	,S000003459,S000003033,S000004232,S000001869,S000005838,S000001761,S000005024,S000005069,S000000885,S000003954,S000002900,S000004013,S000001491,S000000995,S000003929,S000002253,S000000021,S000005848,S000003904,S000002251,S000003431,S000002715,S000002363,S000004062,S000007524,S000005304,S000006267,	,O00400,Q9NUN7,Q2TAA5,Q5R7Z6,P53954,Q9Y673,Q9H6U8,Q75V66,Q06541,P18850,Q99941,A6REI4,Q1DZE0,P0CO61,P0CO60,Q6Y288,Q8BHT6,Q9NZS9,Q96G97,Q1DWP9,P0CM51,P0CM50,Q8WVQ1,Q9Y6K0,O95992,Q9Z0F5,Q96BA8,Q70SY1,Q68CJ9,Q8TEY5,O43889,P28845,Q6R0J2,P16232,Q1HG44,Q92611,Q9HB03,Q9GZR5,Q3S8M4,Q9H5J4,Q969X5,Q9Y282,O75477,O94905,Q16394,P97464,O01705,Q93063,P70428,Q9NQR9,P35575,O43292,Q9WTK3,P38211,Q9H3H5,P0CP65,P0CP64…
	164	ER	1	0	1	0	0	0	0	7		,O14983,Q5VUD6,O02773,Q9UKM7,Q6PKC3,Q07175,Q9BQB6,
	174	ER	1	0	0	0	0	0	90	347	,S000003023,S000005701,S000000178,S000005528,S000005593,S000006396,S000003975,S000000644,S000005302,S000000494,S000003268,S000001184,S000006121,S000004403,S000005055,S000001311,S000005771,S000001292,S000006387,S000003670,S000003200,S000003937,S000000136,S000004236,S000004046,S000003516,S000001233,S000002710,S000006096,S000000107,S000003627,S000004195,S000005851,S000000026,S000005461,S000004911,S0…	,P14060,P26439,Q9H2F3,P45844,Q8TDN7,O00767,Q9ULC5,Q5BKT4,P51648,Q9BV10,P0CM11,P0CM10,Q96F25,Q9BT22,P0CN93,P0CN92,Q92685,Q9Y672,Q1DJR8,Q9BVK2,Q6ZNB7,Q9UKV5,Q96BI3,Q8N2F6,P16615,Q8WXF7,Q8NHH9,Q95LN3,Q6DD88,Q6RW13,Q9Y679,P70295,Q58HT5,Q6E213,Q9UHQ4,P51572,O60238,Q9US09,P41733,O14735,Q92903,P27544,Q1DKX4,P0CM73,P0CM72,Q8N5K1,Q9CQB5,Q07065,Q9NWW5,Q9UBY8,Q9QUK3,O95476,Q6PI25,O95406,Q7Z449,Q9CX98,Q4V8D1…
	136	GL	1	0	0	0	1	0	8	142	,S000001487,S000005497,S000000671,S000003193,S000000841,S000004675,S000002491,S000005467,	,Q9NPC4,Q9N291,Q9UNA3,Q5QJU3,Q04656,Q9P2W7,Q9NPZ5,O75752,Q8NCR0,Q8BG28,O43505,Q9NY97,Q9Y2A9,Q9C0J1,Q9BYG0,Q6ZMB0,Q8NFL0,Q7Z7M8,Q7JK24,Q9Y5Z6,Q7JK25,Q7JK26,Q9MYM7,O43825,O96024,Q9Y2C3,Q9N295,Q96L58,Q76KP1,Q9UBV7,Q9ET32,Q8CFC4,P16442,P38649,Q8TDX6,Q8N6G5,Q9P2E5,Q86X52,Q8IZ52,Q70JA7,O43916,Q9Y4C5,Q80WV3,Q7LGC8,Q8NCG5,Q9GZS9,Q9QUP4,Q9GZX3,Q9NS84,Q9H2A9,O43529,Q9NPF2,Q9NRB3,Q8NET6,Q8NCH0,Q7LFX5,P51797…
	156	GL	1	0	0	1	0	0	0	2	,	,P59632,Q8WZA1,
	166	GL	1	0	1	0	0	0	0	7	,	,Q10471,Q86SF2,Q8IXK2,Q96FL9,Q8N428,P26572,P27808,
	176	GL	1	0	0	0	0	0	25	91	,S000001039,S000003135,S000000024,S000001310,S000002678,S000001266,S000004068,S000001662,S000004210,S000005518,S000001738,S000001023,S000004989,S000000507,S000002101,S000000198,S000000791,S000004658,S000000012,S000002876,S000005378,S000001657,S000001796,S000003166,S000000807,	,P98194,P35670,Q6UX72,Q8NHY0,Q6L9W6,Q6L8S8,Q9NYM9,O15155,Q86V35,Q866X0,Q9BXU9,Q9JJG7,Q13948,Q16739,Q8WUD6,P51795,Q9EPT8,Q6U1Z4,Q9H6L5,Q9Y2H6,Q96A29,Q9BYC5,Q4G0N0,P0CS05,P0CS04,Q1DTI4,Q8TBA6,Q14789,O95249,O14653,Q6ZVE7,Q9Y3E0,Q6P1K1,Q5SRI9,Q5VSG8,Q8TCQ1,Q86YJ5,Q9BT67,Q8R0W6,Q9NV92,P42857,Q62092,P02683,O15243,Q6TCH7,Q9UHJ9,Q9H7Z7,P53633,O60831,Q9NXS2,Q8BH73,O00559,Q9D0V7,O15258,Q9H9V4,Q9Y225,P78382…
	126	GL	1	0	1	0	1	0	0	67	,	,O94766,Q00973,O60909,O60512,O60513,O43286,Q9UBX8,Q10589,O75354,Q9H9S5,Q8AWC7,Q495W5,Q8BHC9,Q68FV3,Q11130,Q14435,Q8N4A0,Q7Z7M9,Q8NCL4,Q8C7U7,Q9NY28,Q9HCQ5,Q02742,O95395,Q9P109,Q5T4J0,Q6ZNI0,Q86SR1,Q8NCW6,Q8IUC8,Q8CF93,Q8N3T1,Q6IS24,Q6P9A2,Q49A17,Q9Y278,Q9Y661,Q8IZT8,Q96QI5,Q9Y663,Q9Y662,Q9Y287,A5A6H8,P33908,P52848,P52849,O95803,Q9H3R1,Q11201,Q16842,Q11206,Q9NSC7,Q9UJ37,Q8NDV1,Q9H4F1,Q9BVH7,Q969X2…
	130	VC	1	0	1	0	1	0	0	1	,	,Q68CP4,
	180	VC	1	0	0	0	0	0	31	13	,S000002974,S000000543,S000003761,S000000790,S000001629,S000005045,S000001218,S000004083,S000002689,S000005296,S000000281,S000001092,S000002369,S000005632,S000002286,S000005796,S000000874,S000001890,S000005940,S000003549,S000002542,S000002370,S000003357,S000001329,S000003815,S000004288,S000005249,S000005003,S000005059,S000005817,S000005613,	,Q9NP78,Q9JJ59,P51798,Q8N682,Q6UX65,Q13571,A6QTW5,Q1E5A9,Q8NHS3,Q8N8N0,Q9NRA2,Q8IY95,Q96NL1,
	113	VC	0	0	1	1	1	0	0	3	,	,P00741,P03423,P00744,
	133	VC	0	0	1	0	1	0	0	56	,	,P19963,P85072,P85073,P85074,P85075,P83606,P01446,P68512,P55106,P80051,P22261,P20896,P27021,P27022,P27023,P27024,P27025,P27026,P23041,O36633,P20895,P10915,P49370,Q5D7H4,P49371,P86687,P01881,P01857,P01859,P01860,P01861,O82015,Q7M1X5,Q7Z3S9,Q9BMK4,Q7M4I5,P82971,Q7M4I6,P05120,Q8H6L7,Q6PXP0,P82242,P27169,P27170,Q15166,Q62087,A6NIE9,Q9UJW2,O75888,Q9D777,P0C6E8,P84787,P18964,P18965,Q6T5L0,Q28833,
	140	VC	1	0	0	0	1	0	8	14	,S000003938,S000005120,S000004694,S000002526,S000001027,S000005265,S000005452,S000005818,	,Q8WWZ7,Q8CF82,P28648,Q13286,O60931,Q9NQX7,Q91VK4,Q9NUN5,Q8IY34,Q14108,O94886,Q9ULQ1,Q8NHX9,O60635,
	143	EX	0	0	0	0	1	0	0	22	,	,P39091,P39092,P00488,O43320,P31371,Q9TTB0,P46647,P01583,P48089,P04822,P30930,O04701,Q6IE36,P0CH86,P36952,P70124,P70564,P07489,P81038,Q1DK59,P0CW96,Q93097,
	152	EX	0	1	1	1	0	0	0	1	,	,P01050,
	163	EX	0	0	0	1	0	0	0	2	,	,P0DJ94,P04203,
	173	EX	0	0	1	0	0	0	0	124	,	,P81111,P81112,P81113,P81114,P83563,P0CF39,P0CF37,P61541,P83609,P0C2C5,P55787,P01032,P60513,P86436,P0DJC3,Q30KQ8,P80571,P0C7X7,Q3BK15,Q698K8,P83254,P17347,Q7LZK1,Q7LZK0,Q7LZI5,Q7LZT4,Q0NZX5,P0C7A7,P0C7A8,P0C6R5,P0C6R6,P0C6R7,P0C6R8,Q9DGH6,P0C6S4,P83667,P49343,P49344,P46443,Q93RR6,P01560,Q9UBH0,P19890,P83207,P86036,P83594,P83036,P83037,P11706,P83595,P60211,P40755,P0C161,P0C162,P0C164,P0C909,P86396…
	183	EX	0	0	0	0	0	0	4	295	,S000000004,S000003947,S000005781,S000005768,	,P85980,P81662,P83412,Q8N302,O60218,P85982,P81496,Q9U5P7,P81216,Q9NFQ4,P81217,P0CH48,P0CH49,Q9H4A4,P49274,Q7M0J9,P83885,P0C005,P04272,P07355,P07356,P86336,P18657,P18649,P83508,A6NMY6,P19341,P83052,P0CC11,P85983,P85412,Q63K34,Q63K35,Q63K37,P0C8I8,P83603,P83604,P83605,P83607,Q9Y3E2,Q53S33,A3MCH6,A2S1Q7,Q62B14,A3P6Z0,Q3JL30,A3NLC8,Q63K41,Q2T704,P63181,P37126,P83545,P83546,P83547,P0C547,P0C8S6,P20850…
							SP+ [Total]		552	4899
							SP- [Total]		514	5438
							Total		1197	10337
	184		0	0	0	0	0	0	308	1695	* cytoplasmic
