# Supplementary material for: Genome-Scale Modeling of the Protein Secretory Machinery in Yeast
Source: PLoS One. 2013 May 7;8(5):e63284. doi: 10.1371/journal.pone.0063284 (PMC3646752; doi:10.1371/journal.pone.0063284)
Supplement: Table S5 — SA of the yeast machinery component with protein abundance data. The estimated specific activity for each component which have the steady state protein abundance data. (XLSX) [file pone.0063284.s009.xlsx]

## Sheet: Sheet1
Table S5 SA of the yeast machinery component with protein abundance data.
model component	Protein abundance	SA(specific activity)	Subsystem
LHS1	136.797	4.63466	protein folding
MNN9	1629.89	3.85402	ERADC
MNN11	3475.7	3.47398	Golgi processing
SEC16	357.977	3.44544	COPII
NPL4	1054.72	3.43604	ERADL
SEC22	395.628	3.40201	COPII
SSH1	704.481	3.39748	TC
SIL1	2420.02	3.38691	protein folding
ROT2	238.012	3.3374	protein folding
MNN10	6278.44	3.21718	Golgi processing
HOC1	7157.3	3.16028	Golgi processing
OST5	1010.9	3.15427	ERglycosylation
TRS20	1197.66	3.14888	COPII
OST6	1083.68	3.12408	ERglycosylation
PNG1	4845.82	3.08537	ERADL
PMT4	1267.52	2.98631	ERglycosylation
USO1	2325.23	2.86074	COPII
BET3	2372.74	2.85196	COPII
SEC3	376.921	2.79134	LDSV
UFD1	3534.3	2.77877	ERAD
CUE1	589.438	2.77437	ERAD
OST4	2431.8	2.77305	ERglycosylation
SRP101	1997.65	2.77124	TC
SEC31	1835.1	2.73564	COPII
TRS23	3126.74	2.73212	COPII
STT3	3004.53	2.6812	ERglycosylation
PMT3	2721.97	2.65438	ERglycosylation
ERV2	258.916	2.62097	protein folding
JEM1	3181.89	2.5968	protein folding
SEC11	3148.83	2.57361	TC
GPI8	1564.44	2.56881	GPI biosynthesis
UBC7	2096.03	2.56808	ERAD
OST3	4031.32	2.55353	ERglycosylation
SRP21	3400.15	2.54026	TC
GPI16	1681.78	2.5374	GPI biosynthesis
BUG1	5215.07	2.50995	COPII
USA1	1885.49	2.50274	ERAD
CLC1	3486.46	2.45921	CPY pathway
VAN1	4749.49	2.43529	ERADC
MNL1	655.803	2.427	ERADL
APL2	2687.57	2.40801	CPY pathway, HDSV
SPC2	4888.82	2.38256	TC
UBX2	12618.9	2.35815	ERADL
HRD1	2664.58	2.35253	ERADL
SEC6	1083.68	2.33269	LDSV
UFD1	3534.3	2.32962	ERADL
SPC1	5547.78	2.32764	TC
TRS31	8349.1	2.30557	COPII
VAM3	414.115	2.30143	ALPpathway
PMT2	6512.44	2.27552	ERglycosylation
SRP68	6278.46	2.27391	TC
SPC3	6844.46	2.23642	TC
SWP1	8450.96	2.23207	ERglycosylation
APM1	4422.33	2.19172	CPY pathway, HDSV
SCJ1	8260.29	2.18249	protein folding
SRP14	7995.65	2.16891	TC
SRP102	8247.63	2.15543	TC
APL4	4845.82	2.15201	CPY pathway, HDSV
KEX1	8553.19	2.13963	Golgi processing
OST1	11889	2.08383	ERglycosylation
APS1	6371.72	2.03312	CPY pathway, HDSV
GGA1	655.803	2.02448	CPY
RER1	2835.84	2.01341	COPI
SRP72	11776.7	2.00074	TC
SEC10	2343.07	1.99781	LDSV
WBP1	14902.6	1.98572	ERglycosylation
CWH41	2835.84	1.96029	protein folding
GPI17	7523.61	1.88675	GPI biosynthesis
KTR3	704.481	1.86119	Golgi processing
SEC63	17716	1.85112	TC
SEC5	3398.67	1.83628	LDSV
APS3	1239.69	1.82524	ALPpathway
ARF1	19342.6	1.82	COPI
SEC15	4276.97	1.73646	LDSV
EXO70	4279.66	1.73618	LDSV
UBA1P	17716	1.69438	ERAD
SEC61	24762.9	1.67796	TC
SEC13	21437	1.66813	COPII
CHC1	28660.8	1.54431	CPY pathway
MNS1	8260.29	1.49597	protein folding
GGA2	2265.49	1.48609	CPY
PMT1	41519.7	1.47101	ERglycosylation
MNN1	1784.37	1.45757	Golgi processing
OCH1	9490.22	1.43569	ERADC
CDC48	78351.1	1.43303	ERAD
EMP24	26817.4	1.41513	COPII
APM3	3410.97	1.38567	ALPpathway
APL6	3573.31	1.36548	ALPpathway
COP1	15238.3	1.28315	COPI
RET2	17957.1	1.21185	COPI
SEC28	23072.7	1.10299	COPI
VPS45	5660.09	1.08843	CPY
SEC26	26000.4	1.05111	COPI
CDC48	78351.1	0.983876	ERADL
KTR1	5480.73	0.970216	Golgi processing
KRE2	13025.3	0.895296	Golgi processing
APL5	13524.1	0.787441	ALPpathway
KAR2	336942	0.637732	protein folding
SEC21	77868.4	0.574729	COPI
SEC27	129074	0.355251	COPI
DPM1	1885.49	2.88355	Dolichol pathway
ALG13	1948	2.86939	Dolichol pathway
ALG11	3137.79	2.66236	Dolichol pathway
ALG12	3553.79	2.60829	Dolichol pathway
ALG5	5795.78	2.39587	Dolichol pathway
