# Supplementary material for: Genome-Scale Modeling of the Protein Secretory Machinery in Yeast
Source: PLoS One. 2013 May 7;8(5):e63284. doi: 10.1371/journal.pone.0063284 (PMC3646752; doi:10.1371/journal.pone.0063284)
Supplement: Table S8 — Human PSIM. The human proteome information for post translational modification and localization information is shown in Table S10. (XLSX) [file pone.0063284.s012.xlsx]

## Sheet: Sheet1
Table S8-HUMAN PSIM
UniProtID	Signal peptide	Disulfide site	N-glycosylation site	O-linked glycisylation	Transmembrane	GPI site	Localization
Q9XFM4	1	2	0	0	0	0
P31946	0	0	0	0	0	0	Cytoplasm. Melanosome. Note=Identified by
P62258	0	0	0	0	0	0	Cytoplasm (By similarity). Melanosome.
Q04917	0	0	0	0	0	0
P61981	0	0	0	0	0	0	Cytoplasm (By similarity).
P31947	0	0	0	0	0	0	Cytoplasm. Nucleus (By similarity).
P27348	0	0	0	0	0	0	Cytoplasm. Note=In neurons, axonally
P63104	0	0	0	0	0	0	Cytoplasm. Melanosome. Note=Located to stage
P30375	1	2	1	0	1	0	Membrane; Single-pass type I membrane
P30443	1	2	1	0	1	0	Membrane; Single-pass type I membrane
P30376	1	2	1	0	1	0	Membrane; Single-pass type I membrane
P01892	1	2	1	0	1	0	Membrane; Single-pass type I membrane
P30377	1	2	1	0	1	0	Membrane; Single-pass type I membrane
P04439	1	2	1	0	1	0	Membrane; Single-pass type I membrane
P30378	1	2	1	0	1	0	Membrane; Single-pass type I membrane
P13749	1	2	1	0	1	0	Membrane; Single-pass type I membrane
P13746	1	2	1	0	1	0	Membrane; Single-pass type I membrane
Q5KMX3	0	0	0	0	0	0
Q96QU6	0	0	0	0	0	0
Q9W698	0	0	0	0	0	0
Q4AC99	0	0	0	0	0	0
P30447	1	2	1	0	1	0	Membrane; Single-pass type I membrane
P05534	1	2	1	0	1	0	Membrane; Single-pass type I membrane
P18462	1	2	1	0	1	0	Membrane; Single-pass type I membrane
P30450	1	2	1	0	1	0	Membrane; Single-pass type I membrane
P30512	1	2	1	0	1	0	Membrane; Single-pass type I membrane
P16188	1	2	1	0	1	0	Membrane; Single-pass type I membrane
P16189	1	2	1	0	1	0	Membrane; Single-pass type I membrane
P10314	1	2	1	0	1	0	Membrane; Single-pass type I membrane
P16190	1	2	1	0	1	0	Membrane; Single-pass type I membrane
P30453	1	2	1	0	1	0	Membrane; Single-pass type I membrane
P30455	1	2	1	0	1	0	Membrane; Single-pass type I membrane
P30456	1	2	1	0	1	0	Membrane; Single-pass type I membrane
P30457	1	2	1	0	1	0	Membrane; Single-pass type I membrane
P01891	1	2	1	0	1	0	Membrane; Single-pass type I membrane
P10316	0	2	1	0	1	0	Membrane; Single-pass type I membrane
P30459	1	2	1	0	1	0	Membrane; Single-pass type I membrane
Q09160	1	2	1	0	1	0	Membrane; Single-pass type I membrane
P30379	1	2	1	0	1	0	Membrane; Single-pass type I membrane
P30380	1	2	1	0	1	0	Membrane; Single-pass type I membrane
P30381	1	2	1	0	1	0	Membrane; Single-pass type I membrane
P30382	1	2	1	0	1	0	Membrane; Single-pass type I membrane
P01889	1	2	1	0	1	0	Membrane; Single-pass type I membrane
P30460	1	2	1	0	1	0	Membrane; Single-pass type I membrane
P30461	1	2	1	0	1	0	Membrane; Single-pass type I membrane
P30462	1	2	1	0	1	0	Membrane; Single-pass type I membrane
P30464	1	2	1	0	1	0	Membrane; Single-pass type I membrane
P30466	1	2	1	0	1	0	Membrane; Single-pass type I membrane
P03989	1	2	1	0	1	0	Membrane; Single-pass type I membrane
P30685	1	2	1	0	1	0	Membrane; Single-pass type I membrane
P18463	1	2	1	0	1	0	Membrane; Single-pass type I membrane
Q95365	1	2	1	0	1	0	Membrane; Single-pass type I membrane
P30475	1	2	1	0	1	0	Membrane; Single-pass type I membrane
Q04826	1	2	1	0	1	0	Membrane; Single-pass type I membrane
P30479	1	2	1	0	1	0	Membrane; Single-pass type I membrane
P30480	1	2	1	0	1	0	Membrane; Single-pass type I membrane
P30481	1	2	1	0	1	0	Membrane; Single-pass type I membrane
P30483	1	2	1	0	1	0	Membrane; Single-pass type I membrane
P30484	1	2	1	0	1	0	Membrane; Single-pass type I membrane
P30485	1	2	1	0	1	0	Membrane; Single-pass type I membrane
P30486	1	2	1	0	1	0	Membrane; Single-pass type I membrane
P30487	1	2	1	0	1	0	Membrane; Single-pass type I membrane
P30488	1	2	1	0	1	0	Membrane; Single-pass type I membrane
P18464	1	2	1	0	1	0	Membrane; Single-pass type I membrane
P30490	1	2	1	0	1	0	Membrane; Single-pass type I membrane
P30491	1	2	1	0	1	0	Membrane; Single-pass type I membrane
P30492	1	2	1	0	1	0	Membrane; Single-pass type I membrane
P30493	1	2	1	0	1	0	Membrane; Single-pass type I membrane
P30495	1	2	1	0	1	0	Membrane; Single-pass type I membrane
P18465	1	2	1	0	1	0	Membrane; Single-pass type I membrane
P10319	1	2	1	0	1	0	Membrane; Single-pass type I membrane
Q29940	1	2	1	0	1	0	Membrane; Single-pass type I membrane
Q29836	1	2	1	0	1	0	Membrane; Single-pass type I membrane
Q31612	1	2	1	0	1	0	Membrane; Single-pass type I membrane
P30498	1	2	1	0	1	0	Membrane; Single-pass type I membrane
Q31610	1	2	1	0	1	0	Membrane; Single-pass type I membrane
Q29718	1	2	1	0	1	0	Membrane; Single-pass type I membrane
P30383	1	2	1	0	1	0	Membrane; Single-pass type I membrane
P30499	1	2	1	0	1	0	Membrane; Single-pass type I membrane
P30385	1	2	1	0	1	0	Membrane; Single-pass type I membrane
P30501	1	2	1	0	1	0	Membrane; Single-pass type I membrane
P30386	1	2	1	0	1	0	Membrane; Single-pass type I membrane
P04222	1	2	1	0	1	0	Membrane; Single-pass type I membrane
P30387	1	2	1	0	1	0	Membrane; Single-pass type I membrane
P30504	1	2	1	0	1	0	Membrane; Single-pass type I membrane
Q9TNN7	1	2	1	0	1	0	Membrane; Single-pass type I membrane
Q29963	1	2	1	0	1	0	Membrane; Single-pass type I membrane
P10321	1	2	1	0	1	0	Membrane; Single-pass type I membrane
P30505	1	2	1	0	1	0	Membrane; Single-pass type I membrane
P30508	1	2	1	0	1	0	Membrane; Single-pass type I membrane
P30510	1	2	1	0	1	0	Membrane; Single-pass type I membrane
Q07000	1	2	1	0	1	0	Membrane; Single-pass type I membrane
Q29960	1	2	1	0	1	0	Isoform 1
Q95604	1	2	1	0	1	0	Membrane; Single-pass type I membrane
Q29865	1	2	1	0	1	0	Membrane; Single-pass type I membrane
P30388	1	2	1	0	1	0	Membrane; Single-pass type I membrane
P22282	1	2	1	0	0	0
P22283	1	2	1	0	0	0
P19361	1	0	0	0	0	0
Q15172	0	0	0	0	0	0	Cytoplasm. Nucleus. Chromosome, centromere.
Q15173	0	0	0	0	0	0	Cytoplasm.
Q14738	0	0	0	0	0	0	Cytoplasm. Nucleus. Note=Nuclear in
Q16537	0	0	0	0	0	0	Cytoplasm.
Q13362	0	0	0	0	0	0	Nucleus. Chromosome, centromere.
P30153	0	0	0	0	0	0	Cytoplasm (By similarity). Chromosome,
P30154	0	0	0	0	0	0
P63151	0	0	0	0	0	0
Q00005	0	0	0	0	0	0	Isoform 1
Q4R8L3	0	0	0	0	0	0	Cytoplasm (By similarity). Cytoplasm,
Q66LE6	0	0	0	0	0	0	Cytoplasm (By similarity).
Q9Y2T4	0	0	0	0	0	0
Q95LP0	0	0	0	0	0	0
P04229	1	2	1	0	1	0	Cell membrane; Single-pass type I membrane
P01912	1	2	1	0	1	0	Cell membrane; Single-pass type I membrane
P13760	1	2	1	0	1	0	Cell membrane; Single-pass type I membrane
P13761	1	2	1	0	1	0	Cell membrane; Single-pass type I membrane
Q30134	1	2	1	0	1	0	Cell membrane; Single-pass type I membrane
Q9TQE0	1	2	1	0	1	0	Cell membrane; Single-pass type I membrane
Q30167	1	2	1	0	1	0	Cell membrane; Single-pass type I membrane
P20039	1	2	1	0	1	0	Cell membrane; Single-pass type I membrane
Q95IE3	1	1	1	0	1	0	Cell membrane; Single-pass type I membrane
Q5Y7A7	1	1	1	0	1	0	Cell membrane; Single-pass type I membrane
Q9GIY3	1	1	1	0	1	0	Cell membrane; Single-pass type I membrane
P01911	1	2	1	0	1	0	Cell membrane; Single-pass type I membrane
Q29974	1	1	1	0	1	0	Cell membrane; Single-pass type I membrane
Q4L4T4	0	0	0	0	0	0
P04403	1	4	0	0	0	0
P80208	0	4	0	0	0	0
P01089	1	8	0	0	0	0
P14060	0	0	0	0	1	0	Endoplasmic reticulum membrane; Single-pass
P26439	0	0	0	0	1	0	Endoplasmic reticulum membrane; Single-pass
Q9H2F3	0	0	0	0	2	0	Endoplasmic reticulum membrane; Multi-pass
P33794	0	0	0	0	0	0
O57245	0	0	0	0	0	0
P21097	0	0	0	0	0	0
Q89187	0	0	0	0	0	0
Q9Y3L3	0	0	0	0	0	0
P78314	0	0	0	0	0	0
Q7L8J4	0	0	0	0	0	0
O60239	0	0	0	0	0	0	Mitochondrion.
Q1E5I0	0	0	0	0	0	0	Cytoplasm (By similarity).
P0CL87	0	0	0	0	0	0	Cytoplasm (By similarity).
P0CL86	0	0	0	0	0	0	Cytoplasm (By similarity).
P46952	0	0	0	0	0	0	Cytoplasm.
P46953	0	0	0	0	0	0	Cytoplasm (By similarity).
P31937	0	0	0	0	0	0	Mitochondrion.
Q18C13	0	0	0	0	0	0
Q4JYA4	0	0	0	0	0	0
Q2GHI5	0	0	0	0	0	0
Q0BR48	0	0	0	0	0	0
Q6A5L3	0	0	0	0	0	0
Q4L8K2	0	0	0	0	0	0
Q5GT31	0	0	0	0	0	0
P29372	0	0	0	0	0	0	Nucleus (Potential).
Q04841	0	0	0	0	0	0	Nucleus (Potential).
P11171	0	0	0	0	0	0	Cytoplasm, cytoskeleton. Cytoplasm, cell
Q13541	0	0	0	0	0	0
Q13542	0	0	0	0	0	0
O60516	0	0	0	0	0	0
Q9NRA8	0	0	0	0	0	0	Cytoplasm. Nucleus. Note=Predominantly
P08195	0	1	4	0	1	0	Apical cell membrane; Single-pass type II
P10852	0	1	10	0	1	0	Apical cell membrane; Single-pass type II
Q7YQK3	0	1	1	0	1	0	Apical cell membrane; Single-pass type II
Q794F9	0	1	8	0	1	0	Apical cell membrane; Single-pass type II
Q9N297	0	1	3	0	7	0	Cell membrane; Multi-pass membrane protein.
P08908	0	1	3	0	7	0	Cell membrane; Multi-pass membrane protein.
Q9N298	0	1	3	0	7	0	Cell membrane; Multi-pass membrane protein.
Q9N296	0	1	3	0	7	0	Cell membrane; Multi-pass membrane protein.
Q9N2B7	0	1	2	0	7	0	Cell membrane; Multi-pass membrane protein.
P28222	0	1	2	0	7	0	Cell membrane; Multi-pass membrane protein.
P60020	0	1	2	0	7	0	Cell membrane; Multi-pass membrane protein.
P49144	0	1	2	0	7	0	Cell membrane; Multi-pass membrane protein.
P28221	0	1	3	0	7	0	Cell membrane; Multi-pass membrane protein.
P49145	0	1	3	0	7	0	Cell membrane; Multi-pass membrane protein.
P28566	0	1	2	0	7	0	Cell membrane; Multi-pass membrane protein.
Q9N2B6	0	1	2	0	7	0	Cell membrane; Multi-pass membrane protein.
O08890	0	1	2	0	7	0	Cell membrane; Multi-pass membrane protein.
P30939	0	1	2	0	7	0	Cell membrane; Multi-pass membrane protein.
Q9N2D9	0	1	2	0	7	0	Cell membrane; Multi-pass membrane protein.
P30940	0	1	2	0	7	0	Cell membrane; Multi-pass membrane protein.
P28223	0	1	5	0	7	0	Cell membrane; Multi-pass membrane protein
P50128	0	1	5	0	7	0	Cell membrane; Multi-pass membrane protein
P50129	0	1	6	0	7	0	Cell membrane; Multi-pass membrane protein
Q5R4Q6	0	1	1	0	7	0	Cell membrane; Multi-pass membrane protein
P41595	0	1	1	0	7	0	Cell membrane; Multi-pass membrane protein.
P28335	0	1	1	0	7	0	Cell membrane; Multi-pass membrane protein.
P46098	1	1	4	0	4	0	Cell junction, synapse, postsynaptic cell
P23979	1	1	3	0	4	0	Cell junction, synapse, postsynaptic cell
O95264	1	1	6	0	4	0	Cell membrane; Multi-pass membrane protein.
Q8WXA8	1	1	0	0	4	0	Cell membrane; Multi-pass membrane protein.
Q70Z44	1	0	1	0	4	0	Cell membrane; Multi-pass membrane protein.
A5X5Y0	1	1	1	0	4	0	Cell membrane; Multi-pass membrane protein.
Q13639	0	1	1	0	7	0	Cell membrane; Multi-pass membrane protein.
P47898	0	1	2	0	7	0	Cell membrane; Multi-pass membrane protein.
P50406	0	1	0	0	7	0	Cell membrane; Multi-pass membrane protein.
P34969	0	1	2	0	7	0	Cell membrane; Multi-pass membrane protein.
P32305	0	1	2	0	7	0	Cell membrane; Multi-pass membrane protein.
Q9BXI3	0	0	0	0	0	0	Cytoplasm.
Q96P26	0	0	0	0	0	0	Cytoplasm (By similarity).
Q91YE9	0	0	0	0	0	0	Cytoplasm.
Q969T7	0	0	0	0	0	0	Cytoplasm (Potential).
Q9H0P0	0	0	0	0	0	0	Cytoplasm (Potential). Isoform 2
P49902	0	0	0	0	0	0	Cytoplasm.
P21589	1	0	4	0	0	1	Cell membrane; Lipid-anchor, GPI-anchor.
P27091	1	4	3	0	0	0	Secreted.
P56378	0	0	0	0	0	0	Mitochondrion (By similarity).
P52209	0	0	0	0	0	0	Cytoplasm (By similarity).
A1A909	0	0	0	0	0	0
Q9ZKB1	0	0	0	0	0	0
O95336	0	0	0	0	0	0	Cytoplasm (By similarity).
Q5PG56	0	0	0	0	0	0
P05408	1	1	0	0	0	0	Secreted. Note=Neuroendocrine and endocrine
A5A6J6	1	1	0	0	0	0	Secreted (By similarity).
P01165	1	1	0	0	0	0	Secreted. Note=Neuroendocrine and endocrine
P36639	0	0	0	0	0	0
P13492	1	0	1	0	0	0
Q76RB8	0	0	0	0	0	0	Host cytoplasm (By similarity).
P20988	0	0	0	0	0	0	Host cytoplasm (By similarity).
P33836	0	0	0	0	0	0	Host cytoplasm (By similarity).
O57224	0	0	0	0	0	0	25 kDa core protein A12L
P20989	0	0	0	0	0	0	25 kDa core protein A12L
P33837	0	0	0	0	0	0	25 kDa core protein A12L
P20990	0	0	0	0	1	0	Virion membrane; Single-pass membrane
P33838	0	0	0	0	1	0	Virion membrane; Single-pass membrane
P0CK28	0	0	0	0	2	0	Virion membrane (By similarity); Multi-pass
P0CK27	0	0	0	0	2	0	Virion membrane (By similarity); Multi-pass
P20991	0	1	0	0	2	0	Virion membrane; Multi-pass membrane protein
P33839	0	1	0	0	2	0	Virion membrane; Multi-pass membrane protein
P68717	0	0	0	0	0	0	Host cytoplasm (By similarity). Virion.
P20992	0	0	0	0	0	0	Host cytoplasm (By similarity). Virion.
P33840	0	0	0	0	0	0	Host cytoplasm (By similarity). Virion.
Q8IZ83	0	0	0	0	0	0
Q676U5	0	0	0	0	0	0	Cytoplasm (By similarity). Preautophagosomal
Q8NAA4	0	0	0	0	0	0	Cytoplasm (By similarity).
P68592	0	2	0	0	2	0	Virion membrane; Multi-pass membrane protein
P68594	0	2	0	0	2	0	Virion membrane; Multi-pass membrane protein
Q8QMT5	0	0	0	0	0	0	Virion (By similarity). Note=Localizes to
Q80DV6	0	0	0	0	0	0	Virion (By similarity). Note=Localizes to
O57227	0	0	0	0	0	0	Virion (By similarity). Note=Localizes to
P20534	0	0	0	0	0	0	Virion (By similarity). Note=Localizes to
Q9JF82	0	0	0	0	0	0	Virion (By similarity). Note=Localizes to
P33827	0	0	0	0	0	0	Virion (By similarity). Note=Localizes to
Q9DHK3	0	0	0	0	0	0	Virion (By similarity). Note=Localizes to
Q6TUQ9	0	0	0	0	0	0	Virion (By similarity). Note=Localizes to
P68713	0	0	0	0	0	0
P20994	0	0	0	0	0	0
P33842	0	0	0	0	0	0
P02763	1	2	5	0	0	0	Secreted.
P19652	1	2	5	0	0	0	Secreted.
P07758	1	0	3	0	0	0	Secreted.
P22599	1	0	3	0	0	0	Secreted.
Q00896	1	0	3	0	0	0	Secreted.
Q00897	1	0	3	0	0	0	Secreted.
Q00898	1	0	3	0	0	0	Secreted.
P20848	1	0	4	0	0	0
P01009	1	0	3	0	0	0	Secreted. Short peptide from AAT
P12725	1	0	4	0	0	0	Secreted.
Q2KJF1	1	5	3	0	0	0	Secreted.
P39091	0	0	1	0	0	0	Secreted.
P04217	1	5	4	0	0	0	Secreted.
P39092	0	0	1	0	0	0	Secreted.
P85980	0	0	0	0	0	0	Secreted.
Q9EPH1	1	5	7	0	0	0	Secreted (By similarity).
Q9NQ94	0	0	0	0	0	0	Nucleus. Endoplasmic reticulum (By
Q5TYW2	0	0	0	0	0	0
Q5SQ80	0	0	0	0	0	0
Q5VUR7	0	0	0	0	0	0
Q4UJ75	0	0	0	0	0	0
A0PJZ0	0	0	0	0	0	0
P68709	0	0	0	0	0	0
P20995	0	0	0	0	0	0
P33843	0	0	0	0	0	0
P68711	0	0	0	0	1	0	Virion membrane; Single-pass type III
P20996	0	0	0	0	1	0	Virion membrane; Single-pass type III
P33844	0	0	0	0	1	0	Virion membrane; Single-pass type III
P0CK20	0	1	0	0	0	0
Q07032	0	1	0	0	0	0
Q96IX9	0	0	0	0	0	0
P21114	0	0	0	0	0	0
Q89489	0	3	0	0	0	0	Virion membrane. Note=A26 is anchored to the
P20535	0	0	0	0	0	0	Virion. Note=Located to the mature virion
P33816	0	0	0	0	0	0	Virion. Note=Located to the mature virion
P68632	0	0	0	0	1	0	Virion membrane; Single-pass type III
P08697	1	1	4	0	0	0	Secreted.
P02750	1	2	4	1	0	0	Secreted.
Q9BVM4	0	0	0	0	0	0
P01023	1	13	8	0	0	0	Secreted.
A8K2U0	1	10	5	0	0	0	Secreted.
A7E2S9	0	0	0	0	0	0
P68595	0	0	0	0	0	0
P68597	0	0	0	0	0	0
P21096	0	0	0	0	0	0
P33848	0	0	0	0	0	0
P68614	0	0	0	0	0	0
P33849	0	0	0	0	0	0
P68616	0	1	2	0	1	0	Host membrane; Single-pass type II membrane
P33850	0	1	2	0	1	0	Host membrane; Single-pass type II membrane
P21057	0	2	0	0	1	0	Virion membrane; Single-pass type II
P33851	0	2	0	0	1	0	Virion membrane; Single-pass type II
P21058	1	0	0	0	0	0	Host endosome (By similarity).
Q89485	0	0	0	0	0	0
P68618	0	0	0	0	1	0	Host membrane; Single-pass membrane protein
P33852	0	0	0	0	1	0	Host membrane; Single-pass membrane protein
Q89183	0	0	0	0	0	0
P21060	0	0	0	0	0	0
Q76QZ9	0	0	0	0	0	0
P21061	0	0	2	0	5	0	Host membrane; Multi-pass membrane protein
P33853	0	0	2	0	5	0	Host membrane; Multi-pass membrane protein
P21063	0	0	0	0	1	0	Host membrane; Single-pass type II membrane
Q89186	0	0	0	0	1	0	Host membrane; Single-pass type II membrane
P21064	1	0	1	0	0	0	Secreted (By similarity).
P33854	1	0	1	0	0	0	Secreted (By similarity).
P21065	1	0	2	0	1	0	Host membrane; Single-pass type I membrane
P33855	1	0	2	0	1	0	Host membrane; Single-pass type I membrane
P21066	0	0	0	0	0	0
P33876	0	0	0	0	0	0
P21067	0	0	0	0	0	0
P33856	0	0	0	0	0	0
P21068	0	0	0	0	0	0
P33857	0	0	0	0	0	0
Q9N290	0	0	0	0	0	0	Golgi apparatus membrane; Single-pass type
Q9NPC4	0	0	2	0	1	0	Golgi apparatus membrane; Single-pass type
Q9N291	0	0	2	0	1	0	Golgi apparatus membrane; Single-pass type
Q9N289	0	0	0	0	0	0	Golgi apparatus membrane; Single-pass type
Q9UNA3	0	0	4	0	1	0	Golgi apparatus membrane; Single-pass type
Q10651	1	6	4	0	1	0	Membrane; Single-pass type I membrane
P14599	1	6	5	0	1	0	Membrane; Single-pass type I membrane
P05067	1	9	2	7	1	0	Membrane; Single-pass type I membrane
P53601	1	9	2	0	1	0	Membrane; Single-pass type I membrane
P12023	1	9	2	0	1	0	Membrane; Single-pass type I membrane
O93279	1	9	1	0	1	0	Membrane; Single-pass type I membrane
O73683	1	8	1	0	1	0	Membrane; Single-pass type I membrane
P20983	0	0	0	0	0	0	Virion (By similarity). Note=Localizes
P33832	0	0	0	0	0	0	Virion (By similarity). Note=Localizes
P21069	0	0	0	0	0	0
P33858	0	0	0	0	0	0
P21070	0	0	0	0	0	0
P21071	0	3	0	0	0	0
P21074	0	0	0	0	0	0
P91927	0	0	0	0	1	0	Mitochondrion membrane; Single-pass membrane
Q96GX2	0	0	0	0	0	0
O57222	1	0	1	0	1	0	Virion membrane; Single-pass membrane
P20987	1	0	1	0	1	0	Virion membrane; Single-pass membrane
P33835	1	0	2	0	1	0	Virion membrane; Single-pass membrane
P30542	0	1	1	0	7	0	Cell membrane; Multi-pass membrane protein.
P29274	0	4	1	0	7	0	Cell membrane; Multi-pass membrane protein.
P29275	0	1	2	0	7	0	Cell membrane; Multi-pass membrane protein.
Q8JG70	0	1	2	0	7	0	Cell membrane; Multi-pass membrane protein.
Q8JG69	0	1	3	0	7	0	Cell membrane; Multi-pass membrane protein.
P33765	0	1	3	0	7	0	Cell membrane; Multi-pass membrane protein.
Q9NS82	0	0	0	0	9	0	Membrane; Multi-pass membrane protein
P22760	0	1	2	0	1	0	Endoplasmic reticulum membrane; Single-pass
Q9NRG9	0	0	0	0	0	0
Q15758	0	0	2	0	10	0	Membrane; Multi-pass membrane protein
Q4L605	0	0	0	0	0	0	Cytoplasm (By similarity).
Q86V21	0	0	0	0	0	0	Cytoplasm, cytosol (By similarity).
P01011	1	0	6	0	0	0	Secreted.
Q8N5Z0	0	0	0	0	0	0	Mitochondrion (Potential).
A1AGD4	0	0	0	0	1	0	Cell inner membrane; Single-pass membrane
Q5PJT8	0	0	0	0	1	0	Cell inner membrane; Single-pass membrane
A1AGD3	0	0	0	0	11	0	Cell inner membrane; Multi-pass membrane
Q5PJT9	0	0	0	0	11	0	Cell inner membrane; Multi-pass membrane
A1AGD5	0	0	0	0	2	0	Cell membrane; Multi-pass membrane protein
Q5PJT7	0	0	0	0	2	0	Cell membrane; Multi-pass membrane protein
Q6PD74	0	0	0	0	0	0
Q2M2I8	0	0	0	0	0	0	Cell membrane; Peripheral membrane protein
Q9Y478	0	0	0	0	0	0
O43741	0	0	0	0	0	0
P54619	0	0	0	0	0	0
Q9UGJ0	0	0	0	0	0	0
Q9UGI9	0	0	0	0	0	0
Q8BGM7	0	0	0	0	0	0
Q9MYP4	0	0	0	0	0	0
Q13685	0	0	0	0	0	0	Cell membrane. Cytoplasm.
Q13131	0	0	0	0	0	0	Cytoplasm. Nucleus. Note=In response to
P54646	0	0	0	0	0	0	Cytoplasm (By similarity). Nucleus. Note=In
Q4LEZ3	0	0	0	0	0	0
Q9BTE6	0	0	0	0	0	0	Cytoplasm (By similarity).
Q9UDR5	0	0	0	0	0	0	Mitochondrion (By similarity).
A1AF47	0	0	0	0	2	0	Cell inner membrane; Multi-pass membrane
Q5PEN7	0	0	0	0	2	0	Cell inner membrane; Multi-pass membrane
Q7Z4T9	0	0	0	0	0	0	Cytoplasm. Mitochondrion. Note=Isoform 4 is
Q95LR0	0	0	0	0	0	0	Cytoplasm (By similarity). Mitochondrion (By
Q8BRC6	0	0	0	0	0	0	Cytoplasm (By similarity). Mitochondrion (By
Q8NHS2	0	0	0	0	0	0	Cytoplasm (By similarity).
P17174	0	0	0	0	0	0	Cytoplasm.
A5A6K8	0	0	0	0	0	0	Cytoplasm (By similarity).
P23542	0	0	0	0	0	0	Cytoplasm. Peroxisome. Note=Targeted to
Q9NY61	0	0	0	0	0	0	Nucleus, nucleolus.
P00505	0	0	0	0	0	0	Mitochondrion matrix. Cell membrane.
Q7Z5M8	0	0	0	0	0	0
Q94FB9	0	0	0	0	5	0	Peroxisome membrane; Multi-pass membrane
Q7Z5R6	0	0	0	0	0	0	Cell membrane; Peripheral membrane protein
Q06811	0	0	0	0	0	0
P81111	0	3	0	0	0	0	Secreted.
P81112	0	3	0	0	0	0	Secreted.
P81113	0	3	0	0	0	0	Secreted.
P81114	0	3	0	0	0	0	Secreted.
P81115	1	4	0	0	0	0	Secreted.
P81116	1	4	0	0	0	0	Secreted.
P31941	0	0	0	0	0	0	Nucleus. Cytoplasm.
Q9UH17	0	0	0	0	0	0
Q9NRW3	0	0	0	0	0	0
Q96AK3	0	0	0	0	0	0
Q8IUX4	0	0	0	0	0	0	Cytoplasm.
Q9HC16	0	0	0	0	0	0	Cytoplasm. Nucleus. Note=Mainly cytoplasmic.
Q6NTF7	0	0	0	0	0	0	Nucleus. Cytoplasm. Note=Mostly nuclear.
Q19Q52	0	0	0	0	0	0	Cytoplasm.
O95477	0	2	21	0	15	0	Membrane; Multi-pass membrane protein.
P41233	0	2	22	0	15	0	Membrane; Multi-pass membrane protein
Q9BZC7	0	0	25	0	14	0	Endosome. Membrane; Multi-pass membrane
P41234	0	0	25	0	13	0	Endosome. Membrane; Multi-pass membrane
Q99758	0	0	0	0	14	0	Membrane; Multi-pass membrane protein
P78363	0	2	8	0	12	0	Membrane; Multi-pass membrane protein.
Q8WWZ7	0	0	3	0	15	0	Lysosome membrane; Multi-pass membrane
Q8CF82	0	0	5	0	15	0	Lysosome membrane; Multi-pass membrane
Q8N139	0	0	3	0	14	0	Membrane; Multi-pass membrane protein
Q8IZY2	0	2	1	0	15	0	Cell membrane; Multi-pass membrane protein.
Q91V24	0	2	1	0	14	0	Cell membrane; Multi-pass membrane protein.
O94911	0	0	5	0	14	0	Cell membrane; Multi-pass membrane protein
Q8IUA7	0	0	3	0	14	0	Membrane; Multi-pass membrane protein
Q8WWZ4	0	0	0	0	15	0	Membrane; Multi-pass membrane protein
Q4W5N1	0	0	0	0	0	0
Q86UK0	0	0	35	0	14	0	Membrane; Multi-pass membrane protein
Q86UQ4	0	0	0	0	14	0	Membrane; Multi-pass membrane protein
Q5SSE9	0	0	0	0	14	0	Membrane; Multi-pass membrane protein
Q2M3G0	0	0	0	0	5	0	Cell membrane; Multi-pass membrane protein.
Q9NP58	0	0	0	0	10	0	Mitochondrion outer membrane; Multi-pass
O75027	0	0	0	0	6	0	Mitochondrion inner membrane; Multi-pass
Q61102	0	0	0	0	6	0	Mitochondrion inner membrane; Multi-pass
Q9NUT2	0	0	0	0	5	0	Mitochondrion inner membrane; Multi-pass
Q9NP78	0	0	0	0	8	0	Lysosome membrane; Multi-pass membrane
Q9JJ59	0	0	0	0	8	0	Lysosome membrane; Multi-pass membrane
Q9NRK6	0	0	0	0	5	0	Mitochondrion inner membrane; Multi-pass
O95342	0	0	4	0	12	0	Membrane; Multi-pass membrane protein.
Q09428	0	0	2	0	17	0	Membrane; Multi-pass membrane protein.
O60706	0	0	5	0	15	0	Membrane; Multi-pass membrane protein
Q96J66	0	0	3	0	10	0	Membrane; Multi-pass membrane protein.
Q9NSE7	0	0	0	0	2	0	Membrane; Multi-pass membrane protein
P33897	0	0	1	0	5	0	Peroxisome membrane; Multi-pass membrane
P48410	0	0	1	0	5	0	Peroxisome membrane; Multi-pass membrane
Q9UBJ2	0	0	2	0	4	0	Peroxisome membrane; Multi-pass membrane
P28288	0	0	3	0	4	0	Peroxisome membrane; Multi-pass membrane
O14678	0	0	0	0	5	0	Peroxisome membrane; Multi-pass membrane
P61221	0	0	0	0	0	0	Cytoplasm. Mitochondrion. Note=Localized to
Q8NE71	0	0	0	0	0	0	Isoform 2
Q7YR37	0	0	0	0	0	0	Cytoplasm (By similarity). Nucleus,
Q9UG63	0	0	0	0	0	0
Q9NUQ8	0	0	0	0	0	0
P45844	0	0	0	0	6	0	Endoplasmic reticulum membrane; Multi-pass
Q64343	0	0	0	0	6	0	Membrane; Multi-pass membrane protein
Q9UNQ0	0	2	1	0	6	0	Cell membrane; Multi-pass membrane protein.
Q7TMS5	0	2	2	0	6	0	Cell membrane; Multi-pass membrane protein
Q9H172	0	0	1	0	6	0	Membrane; Multi-pass membrane protein
Q9H222	0	0	2	0	6	0	Membrane; Multi-pass membrane protein
Q9H221	0	0	1	0	6	0	Membrane; Multi-pass membrane protein
Q8N2K0	0	0	0	0	1	0	Membrane; Single-pass membrane protein (By
A1AB46	0	0	0	0	0	0
Q5PHV8	0	0	0	0	0	0
P41238	0	0	0	0	0	0
Q9Y235	0	0	0	0	0	0
P60704	0	0	0	0	0	0	Cytoplasm (By similarity).
Q99J72	0	0	0	0	0	0	Cytoplasm.
P60705	0	0	0	0	0	0	Cytoplasm (By similarity).
Q8WW27	0	0	0	0	0	0
Q8WP22	0	0	0	0	0	0
Q6UXT9	1	0	0	0	0	0	Secreted (Potential).
Q96SE0	0	0	1	0	1	0	Membrane; Single-pass type II membrane
Q24093	0	0	0	0	1	0	Membrane; Single-pass type II membrane
P08910	0	0	0	0	1	0	Membrane; Single-pass type II membrane
Q8WU67	0	0	0	0	1	0	Membrane; Single-pass type II membrane
Q8TB40	0	0	0	0	0	0
Q8WTS1	0	0	0	0	0	0	Cytoplasm. Lipid droplet (By similarity).
Q9BV23	0	0	0	0	1	0	Membrane; Single-pass type II membrane
Q96I13	0	0	0	0	0	0
Q9NUJ1	0	0	0	0	0	0	Mitochondrion (Potential).
Q8NFV4	0	0	0	0	0	0
Q7L211	0	0	1	0	1	0	Membrane; Single-pass type II membrane
Q9BUJ0	0	0	2	0	1	0	Cytoplasm (By similarity). Membrane; Single-
Q96IU4	0	0	0	0	0	0	Cytoplasm. Nucleus. Note=Predominantly
O95870	0	0	0	0	2	0	Membrane; Multi-pass membrane protein
Q9H3Z7	0	0	0	0	0	0
Q8IZP0	0	0	0	0	0	0	Cytoplasm (By similarity). Nucleus (By
Q9NYB9	0	0	0	0	0	0	Cytoplasm (By similarity). Isoform 1
Q9P2A4	0	0	0	0	0	0	Cytoplasm. Note=Colocalizes with PAK2 at
P00519	0	0	0	0	0	0	Cytoplasm, cytoskeleton. Nucleus. Isoform IB
P00520	0	0	0	0	0	0	Cytoplasm, cytoskeleton. Nucleus.
P42684	0	0	0	0	0	0	Cytoplasm, cytoskeleton.
O14639	0	0	0	0	0	0	Cytoplasm (By similarity). Cytoplasm,
Q6H8Q1	0	0	0	0	0	0	Cytoplasm. Note=In skeletal muscle,
Q8BL65	0	0	0	0	0	0	Cytoplasm. Note=In skeletal muscle,
Q6KC51	0	0	0	0	0	0	Cytoplasm. Note=In skeletal muscle,
O94929	0	0	0	0	0	0	Cytoplasm (By similarity).
P00521	0	0	0	0	0	0
P19801	1	3	4	0	0	0	Secreted, extracellular space.
A8MXG8	0	0	0	0	0	0
Q9JI02	1	0	1	0	0	0	Secreted (Potential).
Q7M747	1	0	0	0	0	0	Secreted (Potential).
Q8N0Z2	0	0	0	0	0	0	Cytoplasm, myofibril, sarcomere (By
Q8I5D2	0	0	0	0	0	0	Cell surface (By similarity).
Q12979	0	0	0	0	0	0
Q9ULW3	0	0	0	0	0	0	Nucleus (By similarity). Nucleus, nucleolus
Q969K4	0	0	0	0	0	0	Cytoplasm.
Q8N961	0	0	0	0	0	0
Q13085	0	0	0	0	0	0	Cytoplasm.
O00763	0	0	0	0	0	0	Endomembrane system. Note=May associate with
Q9UKU7	0	0	0	0	0	0	Mitochondrion.
Q9H845	0	0	0	0	0	0	Mitochondrion (Potential).
P28330	0	0	0	0	0	0	Mitochondrion matrix.
P11310	0	0	0	0	0	0	Mitochondrion matrix.
A5A6I0	0	0	0	0	0	0	Mitochondrion matrix (By similarity).
P16219	0	0	0	0	0	0	Mitochondrion matrix.
P49748	0	0	0	0	0	0	Mitochondrion inner membrane.
Q15027	0	0	0	0	0	0
Q15057	0	0	0	0	0	0
Q96P50	0	0	0	0	0	0
O00400	0	0	1	0	11	0	Endoplasmic reticulum membrane; Multi-pass
Q8NC06	0	0	0	0	0	0
P07106	0	0	0	0	1	0	Peroxisome membrane; Single-pass membrane
Q5T8D3	0	0	0	0	1	0	Peroxisome membrane; Single-pass membrane
Q9BR61	0	0	0	0	0	0	Cytoplasm.
Q8N6N7	0	0	0	0	0	0
Q96GR2	0	0	0	0	0	0	Cytoplasm. Cytoplasmic vesicle (By
Q5FVE4	0	0	0	0	0	0	Cytoplasm. Membrane; Peripheral membrane
Q2XU92	0	0	0	0	0	0	Cytoplasm. Membrane; Peripheral membrane
P07107	0	0	0	0	0	0
P07108	0	0	0	0	0	0
A7ZF35	0	0	0	0	0	0	Cytoplasm (By similarity).
A7GWR2	0	0	0	0	0	0	Cytoplasm (By similarity).
A7HZZ3	0	0	0	0	0	0	Cytoplasm (By similarity).
A7H4T6	0	0	0	0	0	0	Cytoplasm (By similarity).
B9KF15	0	0	0	0	0	0	Cytoplasm (By similarity).
A1A7M9	0	0	0	0	0	0	Cytoplasm (By similarity).
A0Q808	0	0	0	0	0	0	Cytoplasm (By similarity).
Q9ZLS3	0	0	0	0	0	0	Cytoplasm (By similarity).
B4RG38	0	0	0	0	0	0	Cytoplasm (By similarity).
Q5PD69	0	0	0	0	0	0	Cytoplasm (By similarity).
Q4L741	0	0	0	0	0	0	Cytoplasm (By similarity).
C0M857	0	0	0	0	0	0	Cytoplasm (By similarity).
Q1JA98	0	0	0	0	0	0	Cytoplasm (By similarity).
Q1JKF0	0	0	0	0	0	0	Cytoplasm (By similarity).
Q1JFE3	0	0	0	0	0	0	Cytoplasm (By similarity).
Q1J593	0	0	0	0	0	0	Cytoplasm (By similarity).
C0ME08	0	0	0	0	0	0	Cytoplasm (By similarity).
C4Z3C6	0	0	0	0	0	0	Cytoplasm (By similarity).
C4Z630	0	0	0	0	0	0	Cytoplasm (By similarity).
C4Z8P1	0	0	0	0	0	0	Cytoplasm (By similarity).
Q6G581	0	0	0	0	0	0	Cytoplasm (By similarity).
Q6G1D3	0	0	0	0	0	0	Cytoplasm (By similarity).
Q187P6	0	0	0	0	0	0	Cytoplasm (By similarity).
A1ADG5	0	0	0	0	0	0	Cytoplasm (By similarity).
Q0BQJ1	0	0	0	0	0	0	Cytoplasm (By similarity).
B9E7A6	0	0	0	0	0	0	Cytoplasm (By similarity).
B4RCL2	0	0	0	0	0	0	Cytoplasm (By similarity).
Q5PCV4	0	0	0	0	0	0	Cytoplasm (By similarity).
Q4L742	0	0	0	0	0	0	Cytoplasm (By similarity).
C0M856	0	0	0	0	0	0	Cytoplasm (By similarity).
Q1JA97	0	0	0	0	0	0	Cytoplasm (By similarity).
Q1JKE9	0	0	0	0	0	0	Cytoplasm (By similarity).
Q1JFE2	0	0	0	0	0	0	Cytoplasm (By similarity).
Q1J592	0	0	0	0	0	0	Cytoplasm (By similarity).
C0ME09	0	0	0	0	0	0	Cytoplasm (By similarity).
Q16515	0	7	2	0	2	0	Cell membrane; Multi-pass membrane protein
P78348	0	7	2	0	2	0	Cell membrane; Multi-pass membrane protein
Q9UHC3	0	7	2	0	2	0	Cell membrane; Multi-pass membrane protein
Q96FT7	0	5	3	0	2	0	Membrane; Multi-pass membrane protein (By
Q9NY37	0	7	2	0	2	0	Cell membrane; Multi-pass membrane protein.
Q6JQN1	0	0	0	0	0	0
Q709F0	0	0	0	0	0	0	Peroxisome (By similarity). Mitochondrion.
P45954	0	0	0	0	0	0	Mitochondrion matrix.
Q96AP0	0	0	0	0	0	0	Nucleus. Chromosome, telomere.
Q5EE38	0	0	0	0	0	0	Nucleus (By similarity). Chromosome,
Q9BYF1	1	3	7	0	1	0	Processed angiotensin-converting enzyme 2
Q56NL1	1	3	6	0	1	0	Processed angiotensin-converting enzyme 2
Q5EGZ1	1	3	9	0	1	0	Processed angiotensin-converting enzyme 2
Q96TP5	0	0	0	0	0	0	Peroxisome (By similarity).
A1AII6	0	0	0	0	0	0	Cytoplasm (By similarity).
Q8TDN7	0	0	0	0	7	0	Endoplasmic reticulum membrane; Multi-pass
Q5QJU3	0	0	1	0	7	0	Golgi apparatus membrane; Multi-pass
Q9NUN7	0	0	1	0	7	0	Endoplasmic reticulum membrane; Multi-pass
P22303	1	4	3	0	0	0	Cell junction, synapse. Secreted (By Isoform T
P21836	1	4	3	0	0	0	Cell junction, synapse. Secreted. Cell Isoform H
P12821	1	4	15	0	1	0	Angiotensin-converting enzyme, soluble form
Q9GLN7	1	4	16	0	1	0	Angiotensin-converting enzyme, soluble form
Q9GZZ6	1	2	2	0	4	0	Cell junction, synapse, postsynaptic cell
Q03383	1	0	0	0	0	0	Secreted.
P83773	0	0	0	0	0	0	Cytoplasm.
Q15822	1	2	3	0	4	0	Cell junction, synapse, postsynaptic cell
P32297	1	2	2	0	4	0	Cell junction, synapse, postsynaptic cell
P43681	1	2	3	0	4	0	Cell junction, synapse, postsynaptic cell
P30532	1	2	3	0	4	0	Cell junction, synapse, postsynaptic cell
Q15825	1	2	2	0	4	0	Cell junction, synapse, postsynaptic cell
P36544	1	2	3	0	4	0	Cell junction, synapse, postsynaptic cell
Q9UGM1	1	2	2	0	4	0	Cell junction, synapse, postsynaptic cell
P02709	1	2	1	0	4	0	Cell junction, synapse, postsynaptic cell
P02708	1	2	1	0	4	0	Cell junction, synapse, postsynaptic cell
P17787	1	1	3	0	4	0	Cell junction, synapse, postsynaptic cell
Q05901	1	1	3	0	4	0	Cell junction, synapse, postsynaptic cell
P30926	1	1	4	0	4	0	Cell junction, synapse, postsynaptic cell
P11230	1	1	1	0	4	0	Cell junction, synapse, postsynaptic cell
Q07001	1	1	2	0	4	0	Cell junction, synapse, postsynaptic cell
Q04844	1	1	2	0	4	0	Cell junction, synapse, postsynaptic cell
P07510	1	1	2	0	4	0	Cell junction, synapse, postsynaptic cell
P54247	0	1	2	0	4	0	Cell junction, synapse, postsynaptic cell
Q9UKV3	0	0	0	0	0	0	Nucleus. Nucleus speckle. Nucleus,
Q07912	0	0	0	0	0	0	Cell membrane. Nucleus. Endosome. Cell
O54967	0	0	0	0	0	0	Cell membrane. Nucleus. Endosome. Cell
Q8A1G8	0	0	0	0	0	0	Cytoplasm (By similarity).
A6KXS0	0	0	0	0	0	0	Cytoplasm (By similarity).
A7ZDP4	0	0	0	0	0	0	Cytoplasm (By similarity).
A7GYC8	0	0	0	0	0	0	Cytoplasm (By similarity).
A7I2H6	0	0	0	0	0	0	Cytoplasm (By similarity).
A7H4D5	0	0	0	0	0	0	Cytoplasm (By similarity).
B9KFY4	0	0	0	0	0	0	Cytoplasm (By similarity).
Q18B36	0	0	0	0	0	0	Cytoplasm (By similarity).
Q4JXQ4	0	0	0	0	0	0	Cytoplasm (By similarity).
P0CL99	0	0	0	0	0	0
P0CL98	0	0	0	0	0	0
C4Z917	0	0	0	0	0	0	Cytoplasm (By similarity).
Q9ZKU5	0	0	0	0	0	0	Cytoplasm (By similarity).
B9E7B7	0	0	0	0	0	0	Cytoplasm (By similarity).
A6LHA9	0	0	0	0	0	0	Cytoplasm (By similarity).
Q4L752	0	0	0	0	0	0	Cytoplasm (By similarity).
Q8E231	0	0	0	0	0	0	Cytoplasm (By similarity).
C0M6X6	0	0	0	0	0	0	Cytoplasm (By similarity).
Q1JE09	0	0	0	0	0	0	Cytoplasm (By similarity).
Q1JNW6	0	0	0	0	0	0	Cytoplasm (By similarity).
Q1JJ12	0	0	0	0	0	0	Cytoplasm (By similarity).
Q1J8W0	0	0	0	0	0	0	Cytoplasm (By similarity).
C0MEF7	0	0	0	0	0	0	Cytoplasm (By similarity).
Q5JWF8	0	0	0	0	0	0
O96019	0	0	0	0	0	0	Nucleus.
O94805	0	0	0	0	0	0	Nucleus.
Q99MR0	0	0	0	0	0	0	Nucleus.
Q9Y615	0	0	0	0	0	0	Cytoplasm, cytoskeleton (By similarity).
Q9Y614	0	0	0	0	0	0	Cytoplasm, cytoskeleton (By similarity).
Q95JK8	0	0	0	0	0	0	Cytoplasm, cytoskeleton (By similarity).
P53396	0	0	0	0	0	0	Cytoplasm.
Q91V92	0	0	0	0	0	0	Cytoplasm (By similarity).
P11229	0	1	2	0	7	0	Cell membrane; Multi-pass membrane protein.
P08172	0	1	4	0	7	0	Cell membrane; Multi-pass membrane protein.
Q9N2A7	0	1	0	0	7	0	Cell membrane; Multi-pass membrane protein.
Q9N2A3	0	1	5	0	7	0	Cell membrane; Multi-pass membrane protein
P20309	0	1	5	0	7	0	Cell membrane; Multi-pass membrane protein.
Q9N2A4	0	1	4	0	7	0	Cell membrane; Multi-pass membrane protein
Q9N2A2	0	1	4	0	7	0	Cell membrane; Multi-pass membrane protein
P08483	0	1	5	0	7	0	Cell membrane; Multi-pass membrane protein
P08173	0	1	2	0	7	0	Cell membrane; Multi-pass membrane protein.
P08912	0	1	1	0	7	0	Cell membrane; Multi-pass membrane protein.
P08911	0	1	1	0	7	0	Cell membrane; Multi-pass membrane protein.
Q8T8B9	0	0	0	0	0	0
Q8TDX5	0	0	0	0	0	0
Q8R519	0	0	0	0	0	0
P83662	0	0	0	0	0	0
Q8R5M5	0	0	0	0	0	0
P0CM01	0	0	0	0	0	0	Mitochondrion intermembrane space (By
P0CM00	0	0	0	0	0	0	Mitochondrion intermembrane space (By
Q9NRP4	0	0	0	0	0	0	Mitochondrion (Potential).
Q4JVM3	0	0	0	0	0	0
Q8WXI4	0	0	0	0	0	0	Cytoplasm.
Q8VHQ9	0	0	0	0	0	0	Cytoplasm (By similarity).
Q8WYK0	0	0	0	0	0	0	Cytoplasm.
Q9NPJ3	0	0	0	0	0	0	Cytoplasm (By similarity). Mitochondrion (By
P21399	0	0	0	0	0	0	Cytoplasm.
O00767	0	0	0	0	4	0	Endoplasmic reticulum membrane; Multi-pass
Q9ZL64	0	0	0	0	0	0
Q4JVM4	0	0	0	0	0	0
Q99798	0	0	0	0	0	0	Mitochondrion (By similarity).
P37032	0	0	0	0	0	0
Q86TX2	0	0	0	0	0	0	Cytoplasm.
P49753	0	0	0	0	0	0	Mitochondrion.
Q8N9L9	0	0	0	0	0	0	Peroxisome.
Q3I5F7	0	0	0	0	0	0	Cytoplasm.
O14734	0	0	0	0	0	0	Peroxisome.
Q9Y305	0	0	0	0	0	0	Mitochondrion (By similarity).
Q15067	0	0	0	0	0	0	Peroxisome.
Q99424	0	0	0	0	0	0	Peroxisome.
O15254	0	0	0	0	0	0	Peroxisome (Potential).
Q9NUZ1	0	0	0	0	0	0
Q5BLY5	1	2	3	0	0	0	Secreted.
P13798	0	0	0	0	0	0	Cytoplasm.
Q5PFT4	0	0	0	0	0	0
Q8TE99	1	0	1	0	0	0	Secreted (Potential).
Q94519	0	0	0	0	0	0	Mitochondrion.
O14561	0	0	0	0	0	0	Mitochondrion.
Q2GK71	0	0	0	0	0	0	Cytoplasm (By similarity).
Q6G461	0	0	0	0	0	0	Cytoplasm (By similarity).
Q6G084	0	0	0	0	0	0	Cytoplasm (By similarity).
A7ZDS5	0	0	0	0	0	0	Cytoplasm (By similarity).
A7GY16	0	0	0	0	0	0	Cytoplasm (By similarity).
A7I379	0	0	0	0	0	0	Cytoplasm (By similarity).
A7H5D0	0	0	0	0	0	0	Cytoplasm (By similarity).
B9KEZ8	0	0	0	0	0	0	Cytoplasm (By similarity).
A1AE93	0	0	0	0	0	0	Cytoplasm (By similarity).
Q2GG91	0	0	0	0	0	0	Cytoplasm (By similarity).
Q0BTG4	0	0	0	0	0	0	Cytoplasm (By similarity).
Q9ZL36	0	0	0	0	0	0	Cytoplasm (By similarity).
B9E8C4	0	0	0	0	0	0	Cytoplasm (By similarity).
B4RCU9	0	0	0	0	0	0	Cytoplasm (By similarity).
Q6A6U0	0	0	0	0	0	0	Cytoplasm (By similarity).
Q5PIJ4	0	0	0	0	0	0	Cytoplasm (By similarity).
Q4L7V6	0	0	0	0	0	0	Cytoplasm (By similarity).
P63472	0	0	0	0	0	0	Cytoplasm (By similarity).
C0M6I4	0	0	0	0	0	0	Cytoplasm (By similarity).
Q1JA49	0	0	0	0	0	0	Cytoplasm (By similarity).
Q1JK99	0	0	0	0	0	0	Cytoplasm (By similarity).
Q1JF93	0	0	0	0	0	0	Cytoplasm (By similarity).
Q1J544	0	0	0	0	0	0	Cytoplasm (By similarity).
C0MEB8	0	0	0	0	0	0	Cytoplasm (By similarity).
Q5GTK4	0	0	0	0	0	0	Cytoplasm (By similarity).
Q8A2E6	0	0	0	0	0	0	Cytoplasm (By similarity).
A6KZ78	0	0	0	0	0	0	Cytoplasm (By similarity).
Q6G442	0	0	0	0	0	0	Cytoplasm (By similarity).
Q6G056	0	0	0	0	0	0	Cytoplasm (By similarity).
A7ZF37	0	0	0	0	0	0	Cytoplasm (By similarity).
A7GWR1	0	0	0	0	0	0	Cytoplasm (By similarity).
A7HZZ5	0	0	0	0	0	0	Cytoplasm (By similarity).
A7H4T8	0	0	0	0	0	0	Cytoplasm (By similarity).
B9KF13	0	0	0	0	0	0	Cytoplasm (By similarity).
Q0BPZ5	0	0	0	0	0	0	Cytoplasm (By similarity).
Q9ZLS1	0	0	0	0	0	0	Cytoplasm (By similarity).
B4RAG3	0	0	0	0	0	0	Cytoplasm (By similarity).
Q5PGU4	0	0	0	0	0	0	Cytoplasm (By similarity).
Q4L5T4	0	0	0	0	0	0	Cytoplasm (By similarity).
Q83N02	0	0	0	0	0	0	Cytoplasm (By similarity).
Q8NEB7	1	0	0	0	0	0	Secreted (By similarity). Cytoplasmic
Q96QF7	0	0	0	0	0	0	Nucleus (Potential).
P10323	1	6	2	0	0	0
Q08AH3	0	0	0	0	0	0	Mitochondrion matrix (By similarity).
Q68CK6	0	0	0	0	0	0	Mitochondrion matrix.
Q9NUB1	0	0	0	0	0	0	Mitochondrion matrix.
Q6G1W0	0	0	0	0	0	0
Q6FYL4	0	0	0	0	0	0
Q9NR19	0	0	0	0	0	0	Cytoplasm.
Q96CM8	0	0	0	0	0	0	Mitochondrion (Potential).
Q8VCW8	0	0	0	0	0	0	Mitochondrion (Potential).
Q4G176	0	0	0	0	0	0	Mitochondrion.
Q4L235	0	0	0	0	0	0
P33121	0	0	0	0	1	0	Mitochondrion outer membrane; Single-pass
O95573	0	0	0	0	1	0	Mitochondrion outer membrane; Single-pass
O60488	0	0	0	0	1	0	Mitochondrion outer membrane; Single-pass
Q9ULC5	0	0	0	0	1	0	Mitochondrion. Endoplasmic reticulum.
Q9UKU0	0	0	0	0	1	0	Mitochondrion outer membrane; Single-pass
Q08AH1	0	0	0	0	0	0	Mitochondrion matrix (By similarity).
Q53FZ2	0	0	0	0	0	0	Mitochondrion matrix (By similarity).
P0C7M7	0	0	0	0	0	0	Mitochondrion matrix (By similarity).
Q6NUN0	0	0	0	0	0	0	Mitochondrion matrix (By similarity).
Q6P461	0	0	0	0	0	0	Mitochondrion (Potential).
Q9H6R3	0	0	0	0	0	0	Mitochondrion (Potential).
Q8I4X0	0	0	0	0	0	0	Cytoplasm, cytoskeleton.
Q8ILW9	0	0	0	0	0	0	Cytoplasm, cytoskeleton.
P62736	0	0	0	0	0	0	Cytoplasm, cytoskeleton.
Q562R1	0	0	0	0	0	0	Cytoplasm, cytoskeleton (By similarity).
Q9BYX7	0	0	0	0	0	0	Cytoplasm, cytoskeleton (By similarity).
P60709	0	0	0	0	0	0	Cytoplasm, cytoskeleton. Note=Localized in
P60710	0	0	0	0	0	0	Cytoplasm, cytoskeleton. Note=Localized in
P68032	0	0	0	0	0	0	Cytoplasm, cytoskeleton.
P63261	0	0	0	0	0	0	Cytoplasm, cytoskeleton.
Q01718	0	0	2	0	7	0	Cell membrane; Multi-pass membrane protein.
P63267	0	0	0	0	0	0	Cytoplasm, cytoskeleton.
Q9H568	0	0	0	0	0	0	Cytoplasm, cytoskeleton (By similarity).
Q8TC94	0	0	0	0	0	0	Cytoplasm, cytoskeleton (By similarity).
P12814	0	0	0	0	0	0	Cytoplasm, cytoskeleton. Cytoplasm,
P35609	0	0	0	0	0	0	Cytoplasm, myofibril, sarcomere, Z line.
Q08043	0	0	0	0	0	0
O43707	0	0	0	0	0	0	Nucleus. Cytoplasm. Note=Localized in
P00785	1	3	0	0	0	0
A5HII1	1	3	0	0	0	0
P81662	0	0	0	0	0	0	Secreted. Nematocyst. Target cell membrane
A1AIQ8	0	0	0	0	13	0	Cell inner membrane; Multi-pass membrane
Q5PJ05	0	0	0	0	13	0	Cell inner membrane; Multi-pass membrane
P68133	0	0	0	0	0	0	Cytoplasm, cytoskeleton.
Q8TDG2	0	0	0	0	0	0	Cytoplasm, cytoskeleton (By similarity).
Q8TDY3	0	0	0	0	0	0	Cytoplasm, cytoskeleton (By similarity).
P42025	0	0	0	0	0	0	Cytoplasm, cytoskeleton. Cytoplasm,
P61163	0	0	0	0	0	0	Cytoplasm, cytoskeleton. Cytoplasm,
P86700	0	0	0	0	0	0	Cytoplasm, cytoskeleton.
A6R213	0	0	0	0	0	0	Nucleus (By similarity).
C5PHH6	0	0	0	0	0	0	Nucleus (By similarity).
C4JFE4	0	0	0	0	0	0	Nucleus (By similarity).
P36896	1	0	1	0	1	0	Cell membrane; Single-pass type I membrane
Q8NER5	1	0	0	0	1	0	Membrane; Single-pass type I membrane
P37023	1	0	1	0	1	0	Membrane; Single-pass type I membrane
Q04771	1	0	1	0	1	0	Membrane; Single-pass type I membrane
Q03154	0	0	0	0	0	0	Cytoplasm.
P46446	0	0	0	0	0	0	Cytoplasm. Nucleus (By similarity).
P45381	0	0	0	0	0	0	Cytoplasm. Nucleus (By similarity).
Q8R3P0	0	0	0	0	0	0	Cytoplasm. Nucleus (By similarity).
Q96HD9	0	0	0	0	0	0	Apical cell membrane; Peripheral membrane
Q91XE4	0	0	0	0	0	0	Apical cell membrane; Peripheral membrane
P07311	0	0	0	0	0	0
P14621	0	0	0	0	0	0
Q8G4T0	0	0	0	0	0	0
A1A9N7	0	1	0	0	0	0
Q0BUL9	0	0	0	0	0	0
Q5PGB8	0	1	0	0	0	0
Q4L6A9	0	0	0	0	0	0
O14672	1	10	4	0	1	0	Cell membrane; Single-pass type I membrane
O75078	1	7	4	0	1	0	Membrane; Single-pass type I membrane
O43184	1	7	5	0	1	0	Isoform 1
Q13444	1	7	5	0	1	0	Endomembrane system; Single-pass type I
P78536	1	7	9	0	1	0	Membrane; Single-pass type I membrane
Q9Z0F8	1	7	7	0	1	0	Isoform Long
Q9Y3Q7	1	7	12	0	1	0	Membrane; Single-pass type I membrane
Q9H013	1	7	4	0	1	0	Membrane; Single-pass type I membrane
P35348	0	1	3	0	7	0	Cell membrane; Multi-pass membrane protein.
P35368	0	1	4	0	7	0	Cell membrane; Multi-pass membrane protein.
P15823	0	1	3	0	7	0	Cell membrane; Multi-pass membrane protein.
P25100	0	0	2	0	7	0	Cell membrane; Multi-pass membrane protein.
P23944	0	0	2	0	7	0	Cell membrane; Multi-pass membrane protein.
O43506	1	7	6	0	1	0	Membrane; Single-pass type I membrane
Q9UKJ8	1	7	7	0	1	0	Membrane; Single-pass type I membrane
Q9P0K1	1	20	4	0	1	0	Membrane; Single-pass type I membrane
O75077	1	7	8	0	1	0	Cell membrane; Single-pass type I membrane Isoform Gamma
Q9R1V7	1	7	8	0	1	0	Cell membrane; Single-pass type I membrane Isoform Gamma
Q9UKQ2	1	7	5	0	1	0	Isoform 1
Q9XSL6	1	7	6	0	1	0	Membrane; Single-pass type I membrane
Q9JLN6	1	7	7	0	1	0	Membrane; Single-pass type I membrane
Q9UKF5	1	7	9	0	1	0	Membrane; Single-pass type I membrane
Q90WY4	0	1	3	0	7	0	Cell membrane; Multi-pass membrane protein.
P08913	0	1	2	0	7	0	Cell membrane; Multi-pass membrane protein.
Q90WY5	0	1	2	0	7	0	Cell membrane; Multi-pass membrane protein.
P18089	0	1	0	0	7	0	Cell membrane; Multi-pass membrane protein.
P30545	0	1	0	0	7	0	Cell membrane; Multi-pass membrane protein.
Q90WY6	0	1	3	0	7	0	Cell membrane; Multi-pass membrane protein.
P18825	0	1	2	0	7	0	Cell membrane; Multi-pass membrane protein.
Q9UKF2	1	7	5	0	1	0	Membrane; Single-pass type I membrane
Q8TC27	1	7	4	0	1	0	Membrane; Single-pass type I membrane
Q9BZ11	1	7	5	0	1	0	Membrane; Single-pass type I membrane
Q923W9	1	7	6	0	1	0	Membrane; Single-pass type I membrane
Q96M93	0	0	0	0	0	0	Nucleus (By similarity).
Q8NCV1	0	0	0	0	0	0
Q95JV3	0	0	0	0	0	0
Q6DHV7	0	0	0	0	0	0
Q99965	1	7	5	0	1	0	Membrane; Single-pass type I membrane
Q6NVV9	0	0	0	0	0	0
Q9H2U9	1	4	6	0	1	0	Membrane; Single-pass type I membrane
P78325	1	7	4	0	1	0	Membrane; Single-pass type I membrane
Q13443	1	7	6	0	1	0	Isoform 1
O75689	0	0	0	0	0	0	Nucleus. Cytoplasm. Note=Recruited to the
Q9NPF8	0	0	0	0	0	0	Cytoplasm. Cell membrane.
A8MUL3	0	0	0	0	0	0
O00116	0	0	0	0	0	0	Peroxisome membrane. Note=Localized to the
Q9BUB4	0	0	0	0	0	0
Q7Z6V5	0	0	0	0	0	0
Q96EY9	0	0	0	0	0	0
P56658	0	0	0	0	0	0	Cell membrane; Peripheral membrane protein;
P06134	0	0	0	0	0	0
P00813	0	0	0	0	0	0	Cell membrane; Peripheral membrane protein;
P03958	0	0	0	0	0	0	Cell membrane; Peripheral membrane protein;
Q86TW2	1	0	0	0	0	0	Secreted (Potential).
Q7Z695	0	0	0	0	1	0	Membrane; Single-pass membrane protein
Q8NI60	0	0	0	0	0	0	Mitochondrion.
Q60936	0	0	0	0	0	0	Mitochondrion (By similarity).
Q96D53	0	0	0	0	1	0	Membrane; Single-pass membrane protein
Q3MIX3	0	0	0	0	1	0	Membrane; Single-pass membrane protein
Q6P093	1	1	0	0	0	0	Secreted.
Q5VUY0	0	0	0	0	0	0
Q5VUY2	0	0	2	0	1	0	Membrane; Single-pass type II membrane
Q08828	0	0	1	0	12	0	Membrane; Multi-pass membrane protein.
Q08462	0	0	2	0	12	0	Membrane; Multi-pass membrane protein.
O60266	0	0	1	0	12	0	Membrane; Multi-pass membrane protein.
Q8NFM4	0	0	2	0	12	0	Membrane; Multi-pass membrane protein.
O95622	0	0	2	0	12	0	Membrane; Multi-pass membrane protein. Cell
O43306	0	0	1	0	12	0	Membrane; Multi-pass membrane protein. Cell
P51828	0	0	3	0	12	0	Membrane; Multi-pass membrane protein.
P40145	0	0	3	0	12	0	Membrane; Multi-pass membrane protein.
O60503	0	0	3	0	12	0	Membrane; Multi-pass membrane protein.
Q96PN6	0	0	0	0	0	0	Cell membrane; Peripheral membrane protein;
Q96A70	0	0	0	0	0	0
Q8BVM4	0	0	0	0	0	0	Mitochondrion.
Q18AN9	0	0	0	0	0	0
P35611	0	0	0	0	0	0	Cytoplasm, cytoskeleton. Cell membrane;
Q4L4Y3	0	0	0	0	0	0
Q8E061	0	0	0	0	0	0
Q1JCJ8	0	0	0	0	0	0
Q1JMH5	0	0	0	0	0	0
Q1JHM1	0	0	0	0	0	0
Q1J7E4	0	0	0	0	0	0
C0MGY6	0	0	0	0	0	0
Q18AP0	0	0	0	0	0	0
P35612	0	0	0	0	0	0	Cytoplasm, cytoskeleton. Cell membrane;
Q4L4Y2	0	0	0	0	0	0
Q8E062	0	0	0	0	0	0
Q1JCJ9	0	0	0	0	0	0
Q1JMH6	0	0	0	0	0	0
Q1JHM2	0	0	0	0	0	0
Q1J7E5	0	0	0	0	0	0
C0MGY7	0	0	0	0	0	0
Q9UEY8	0	0	0	0	0	0	Cytoplasm, cytoskeleton. Cell membrane;
A1ABG8	0	0	0	0	0	0
P63910	0	0	0	0	0	0
C0M691	0	0	0	0	0	0
C0MHB1	0	0	0	0	0	0
O15204	1	2	4	0	0	0	Secreted (By similarity).
A1AHK5	0	0	0	0	0	0
A5ULK1	0	0	0	0	0	0
Q2NER8	0	0	0	0	0	0
A6LG60	0	0	0	0	0	0
P03252	0	0	0	0	0	0
P10381	0	0	0	0	0	0
P07885	0	0	0	0	0	0
P03253	0	0	0	0	0	0
Q5TJ03	0	0	0	0	0	0
P09569	0	0	0	0	0	0
Q9WF19	0	0	0	0	0	0
P11825	0	0	0	0	0	0
P11826	0	0	0	0	0	0
B9KE87	0	0	0	0	0	0
P07327	0	0	0	0	0	0	Cytoplasm.
P00325	0	0	0	0	0	0	Cytoplasm.
P14139	0	0	0	0	0	0	Cytoplasm.
P00326	0	0	0	0	0	0	Cytoplasm.
P43067	0	0	0	0	0	0	Cytoplasm (Probable).
P08319	0	0	0	0	0	0	Cytoplasm.
Q9QYY9	0	0	0	0	0	0	Cytoplasm (By similarity).
Q64563	0	0	0	0	0	0	Cytoplasm (By similarity).
P28332	0	0	0	0	0	0	Cytoplasm.
P40394	0	0	0	0	0	0	Cytoplasm.
P11766	0	0	0	0	0	0	Cytoplasm.
P80360	0	0	0	0	0	0	Cytoplasm.
P81431	0	0	0	0	0	0	Cytoplasm.
Q0VDE8	0	0	0	0	1	0	Membrane; Single-pass membrane protein
Q15848	1	1	0	6	0	0	Secreted.
Q9Y2D8	0	0	0	0	0	0	Cell junction, adherens junction (By
P55262	0	0	0	0	0	0
P55263	0	0	0	0	0	0
P55264	0	0	0	0	0	0
Q64640	0	0	0	0	0	0
Q7Z4H4	1	1	0	0	0	0	Secreted.
C9JUS6	1	1	0	0	0	0	Secreted (Potential).
P35318	1	1	0	0	0	0	Secreted.
Q6IQ32	0	0	0	0	0	0	Nucleus (Probable).
Q9H2P0	0	0	0	0	0	0	Nucleus (Potential).
Q9Z103	0	0	0	0	0	0	Nucleus (Potential).
Q06278	0	0	0	0	0	0	Cytoplasm.
Q9BRR6	1	0	0	0	0	0	Secreted (Potential).
Q9NRN7	0	0	0	0	0	0	Cytoplasm.
P54922	0	0	0	0	0	0
P54923	0	0	0	0	0	0
Q3LIE5	0	0	0	0	0	0
Q96A54	0	0	0	0	7	0	Membrane; Multi-pass membrane protein.
Q86V24	0	0	0	0	7	0	Membrane; Multi-pass membrane protein.
P08588	0	2	1	0	7	0	Cell membrane; Multi-pass membrane protein.
P07550	0	2	2	0	7	0	Cell membrane; Multi-pass membrane protein.
Q60483	0	2	2	0	7	0	Cell membrane; Multi-pass membrane protein.
P13945	0	2	2	0	7	0	Cell membrane; Multi-pass membrane protein.
Q28524	0	2	2	0	7	0	Cell membrane; Multi-pass membrane protein.
P25962	0	2	2	0	7	0	Cell membrane; Multi-pass membrane protein.
Q16186	0	0	0	0	0	0	Cytoplasm. Nucleus.
Q9JMB5	0	0	0	0	0	0	Cytoplasm (By similarity). Nucleus (By
P22570	0	0	0	0	0	0	Mitochondrion matrix.
P48360	0	0	0	0	0	0	Mitochondrion matrix.
Q12184	0	0	0	0	0	0	Mitochondrion matrix.
Q9Y6U3	0	0	0	0	0	0	Cytoplasm, cytoskeleton.
P12235	0	0	0	0	6	0	Mitochondrion inner membrane; Multi-pass
P48962	0	0	0	0	6	0	Mitochondrion inner membrane; Multi-pass
P05141	0	0	0	0	6	0	Mitochondrion inner membrane; Multi-pass
P51881	0	0	0	0	6	0	Mitochondrion inner membrane; Multi-pass
P18239	0	0	0	0	6	0	Mitochondrion inner membrane; Multi-pass
P12236	0	0	0	0	6	0	Mitochondrion inner membrane; Multi-pass
Q9H0C2	0	0	0	0	6	0	Mitochondrion inner membrane; Multi-pass
Q3V132	0	0	0	0	6	0	Mitochondrion inner membrane; Multi-pass
Q96IZ2	0	0	0	0	6	0	Cell membrane; Multi-pass membrane protein.
Q6P4F2	0	0	0	0	0	0	Mitochondrion matrix (By similarity).
P10109	0	0	0	0	0	0	Mitochondrion matrix.
Q8IUX7	1	0	2	0	0	0	Isoform 1
Q640N1	1	0	1	0	0	0	Isoform 1
Q6ZN18	0	0	0	0	0	0	Nucleus (Probable).
Q96SZ5	0	0	0	0	0	0
Q6UXC1	1	6	6	0	1	0	Membrane; Single-pass type I membrane
A2AJA7	1	6	5	0	1	0	Membrane; Single-pass type I membrane
Q8WTP8	0	0	0	0	0	0	Nucleus. Nucleus, nucleolus. Note=Localized
Q5NDL2	1	0	1	0	0	0	Secreted (Potential).
A1A8E2	0	0	0	0	0	0	Cytoplasm (By similarity).
Q08117	0	0	0	0	0	0	Nucleus (By similarity).
P63002	0	0	0	0	0	0	Nucleus (By similarity).
Q5PFJ2	0	0	0	0	0	0	Cytoplasm (By similarity).
P55197	0	0	0	0	0	0	Nucleus.
P55198	0	0	0	0	0	0	Nucleus (Potential).
Q8TED9	0	0	0	0	0	0
Q8N4X5	0	0	0	0	0	0	Cytoplasm.
Q13015	0	0	0	0	0	0
P0CM09	0	0	0	0	0	0	Cytoplasm (By similarity). Nucleus (By
P0CM08	0	0	0	0	0	0	Cytoplasm (By similarity). Nucleus (By
P42568	0	0	0	0	0	0	Nucleus (By similarity).
P55196	0	0	0	0	0	0	Cell junction, adherens junction. Note=Not
P08180	1	0	0	0	0	0	Fimbrium.
Q57254	1	0	0	0	0	0	Fimbrium.
Q9NQ60	1	0	2	0	1	0	Cytoplasmic vesicle, secretory vesicle,
P84797	0	0	0	0	0	0
P43652	1	17	5	0	0	0	Secreted.
O89020	1	15	5	0	0	0	Secreted. Note=Detected in large and small
Q8N556	0	0	0	0	0	0	Cytoplasm, cytoskeleton. Note=Localizes with
P51825	0	0	0	0	0	0	Nucleus (Potential).
O88573	0	0	0	0	0	0	Nucleus (Potential).
P51816	0	0	0	0	0	0	Nucleus speckle. Note=When splicing is
P51826	0	0	0	0	0	0	Nucleus.
Q9UHB7	0	0	0	0	0	0	Nucleus.
Q9ESC8	0	0	0	0	0	0	Nucleus (By similarity).
Q920A7	0	0	0	0	2	0	Mitochondrion membrane; Multi-pass membrane
Q9Y4W6	0	0	0	0	2	0	Mitochondrion membrane; Multi-pass membrane
Q63HM1	0	0	0	0	0	0	Cytoplasm, cytosol (By similarity). Nucleus
P83412	0	0	0	0	0	0	Secreted.
P84794	0	0	0	0	0	0	Vacuole (By similarity).
P86796	0	0	0	0	0	0
Q10722	0	0	0	0	0	0
Q6ULP2	0	0	0	0	0	0	Cytoplasm. Note=Colocalizes with AP1G1 and
Q5BKT4	0	0	0	0	12	0	Endoplasmic reticulum membrane; Multi-pass
Q5I7T1	0	0	0	0	12	0	Cell membrane; Multi-pass membrane protein
Q1E8D2	1	0	0	0	0	0	Secreted (By similarity).
P0CW95	1	0	0	0	0	0	Secreted.
C9J202	0	0	0	0	0	0
Q5T2P9	0	0	0	0	0	0
Q8TF27	0	0	0	0	0	0
Q8A6L0	1	0	0	0	0	0
Q42656	1	2	0	0	0	0
P06280	1	5	4	0	0	0	Lysosome.
P51569	1	5	3	0	0	0	Lysosome.
Q9UPQ3	0	0	0	0	0	0	Cytoplasm. Note=Associates with the
Q99490	0	0	0	0	0	0	Isoform 1
Q96P47	0	0	0	0	0	0	Cytoplasm. Note=In cells upon oxidative
Q96P64	0	0	0	0	0	0
A6NIR3	0	0	0	0	0	0
Q5VW22	0	0	0	0	0	0
Q5VUJ5	0	0	0	0	0	0
Q5SRD3	0	0	0	0	0	0
Q5VTM2	0	0	0	0	0	0
P52594	0	0	0	1	0	0	Nucleus. Cytoplasmic vesicle.
O95081	0	0	0	0	0	0
Q8JIV9	1	4	1	0	0	0	Secreted (By similarity).
Q8AYA5	1	3	0	0	0	0	Secreted (By similarity).
Q8AYA4	1	4	0	0	0	0	Secreted (By similarity).
Q8AYA3	1	4	0	0	0	0	Secreted (By similarity).
Q8N302	0	0	0	0	0	0	Cytoplasm. Secreted. Note=Cytoplasmic in
Q9H0P7	0	0	0	0	0	0
P33888	0	0	0	0	0	0
P33889	0	0	0	0	0	0
P11218	1	8	1	0	0	0
Q9DEA2	1	4	0	0	0	0	Secreted.
Q9DEA1	1	4	0	0	0	0	Secreted.
Q53H12	0	0	0	0	0	0	Mitochondrion membrane.
P29064	1	0	24	0	0	0
Q9P4V2	0	0	0	0	0	0
O95394	0	0	0	0	0	0
P14998	0	0	0	0	1	0	Host cytoplasm (Potential). Host nucleus
P03085	0	0	0	0	1	0	Host cytoplasm (Potential). Host nucleus
P03086	0	0	0	0	1	0	Host cytoplasm (Potential). Host nucleus
Q9UL18	0	0	0	0	0	0	Cytoplasm, P-body.
Q9UKV8	0	0	0	0	0	0	Cytoplasm, P-body. Nucleus.
Q8CJG0	0	0	0	0	0	0	Cytoplasm, P-body (By similarity). Nucleus
Q9H9G7	0	0	0	0	0	0	Cytoplasm, P-body.
Q9HCK5	0	0	0	0	0	0	Cytoplasm, P-body.
Q8NAT1	1	0	2	0	0	0	Secreted (Potential).
C6LTG5	0	0	0	0	0	0	Cytoplasm (By similarity).
A2RU49	0	0	0	0	0	0	Cytoplasm (Potential).
O95994	1	0	0	0	0	0	Secreted. Endoplasmic reticulum (By
O88312	1	0	0	0	0	0	Secreted (By similarity). Endoplasmic
Q8TD06	1	0	0	0	0	0	Secreted (Probable).
Q4L7S0	0	0	0	0	4	0	Cell membrane; Multi-pass membrane protein
O00468	1	24	4	0	0	0	Secreted, extracellular space, extracellular
O00253	1	5	0	0	0	0	Secreted. Golgi apparatus lumen.
Q9BXM8	0	0	0	0	0	0
Q9BYV1	0	0	0	0	0	0	Mitochondrion (Potential).
P30556	0	1	3	0	7	0	Cell membrane; Multi-pass membrane protein.
Q9GLN9	0	1	3	0	7	0	Cell membrane; Multi-pass membrane protein.
P50052	0	2	5	0	7	0	Cell membrane; Multi-pass membrane protein.
P29754	0	1	3	0	7	0	Cell membrane; Multi-pass membrane protein.
P29755	0	1	3	0	7	0	Cell membrane; Multi-pass membrane protein.
Q5TGY3	0	0	0	0	0	0
Q8N157	0	0	0	0	0	0	Cytoplasm, cytoskeleton, cilium basal body
Q8IVF2	0	0	0	0	0	0	Nucleus (By similarity).
Q09666	0	0	0	0	0	0	Nucleus.
Q4L376	0	2	0	0	0	0
Q0BUC5	0	2	0	0	0	0
A9YTQ3	0	0	0	0	0	0	Cytoplasm. Nucleus. Note=Predominantly in
P35869	0	0	0	0	0	0	Cytoplasm. Nucleus. Note=Initially
P30561	0	0	0	0	0	0	Cytoplasm. Nucleus. Note=Initially
O95433	0	0	0	0	0	0	Cytoplasm, cytosol. Endoplasmic reticulum.
Q719I0	0	0	0	0	0	0
Q9NZD4	0	0	0	0	0	0	Cytoplasm.
Q9KWN0	1	0	0	0	0	0
Q8NCW5	1	0	0	0	0	0	Secreted. Note=In sperm, secretion gradually
Q9GZX7	0	0	0	0	0	0
Q03155	1	0	0	0	14	0	AIDA-I autotransporter
Q96BJ3	0	0	0	0	0	0
Q9BQI0	0	0	0	0	0	0	Cytoplasm, cytoskeleton. Cell projection,
P55008	0	0	0	0	0	0	Cytoplasm, cytoskeleton. Cell projection,
O70200	0	0	0	0	0	0	Cytoplasm, cytoskeleton. Cell projection,
O95831	0	0	0	0	0	0	Mitochondrion intermembrane space.
Q9BRQ8	0	0	0	0	1	0	Cytoplasm. Mitochondrion outer membrane.
Q96NN9	0	0	0	0	0	0	Mitochondrion. Note=Does not translocate to
Q9NVV5	0	0	0	0	6	0	Membrane; Multi-pass membrane protein
Q8N1P7	0	0	0	0	0	0
Q9Y4K1	0	0	0	0	0	0
C5PFU3	0	0	0	0	0	0	Mitochondrion (By similarity).
O14862	0	0	0	0	0	0	Nucleus.
A6RBB3	0	0	0	0	2	0	Mitochondrion membrane; Multi-pass membrane
C5P447	0	0	0	0	2	0	Mitochondrion membrane; Multi-pass membrane
C4JHR1	0	0	0	0	2	0	Mitochondrion membrane; Multi-pass membrane
Q12904	0	0	0	0	0	0	Nucleus. Cytoplasm, cytosol. Cytoplasmic
Q13155	0	0	0	0	0	0	Cytoplasm, cytosol (By similarity). Nucleus
Q16352	0	0	0	0	0	0
Q9NZN9	0	0	0	0	0	0	Cytoplasm. Nucleus.
O00170	0	0	0	0	0	0	Cytoplasm.
O43918	0	0	0	0	0	0	Nucleus. Cytoplasm. Note=Associated with
Q9Z0E3	0	0	0	0	0	0	Nucleus. Cytoplasm. Note=Predominantly
A1ADA4	1	0	0	0	0	0	Periplasm (By similarity).
Q5PC78	1	0	0	0	0	0	Periplasm (By similarity).
Q9UKB5	0	0	0	0	1	0	Basolateral cell membrane; Single-pass type
Q96IF1	0	0	0	0	0	0	Cytoplasm, cytoskeleton. Cell membrane. Cell
Q02040	0	0	0	0	0	0	Nucleus speckle.
P14550	0	0	0	0	0	0
O60218	0	0	0	0	0	0	Lysosome. Secreted. Note=Secreted through a
C9JRZ8	0	0	0	0	0	0
Q04828	0	0	0	0	0	0	Cytoplasm.
P52895	0	0	0	0	0	0	Cytoplasm (Potential).
P42330	0	0	0	0	0	0	Cytoplasm.
P17516	0	0	0	0	0	0	Cytoplasm.
Q1XAA8	0	0	0	0	0	0	Cytoplasm (By similarity).
P51857	0	0	0	0	0	0	Cytoplasm.
O43572	0	0	0	0	0	0	Mitochondrion. Membrane. Cytoplasm.
Q9UKA4	0	0	0	0	0	0	Cytoplasm. Cytoplasm, cytoskeleton,
Q02952	0	0	0	0	0	0	Cytoplasm, cell cortex (Probable).
Q86UN6	0	0	0	0	0	0	Cytoplasm (Probable).
O43687	0	0	0	0	0	0	Isoform Alpha
Q9P0M2	0	0	0	0	0	0	Cytoplasm.
Q92667	0	0	0	0	0	0	Mitochondrion outer membrane (Potential).
Q9Y2D5	0	0	0	0	0	0
O75969	0	0	0	0	0	0	Cytoplasmic vesicle, secretory vesicle,
Q5JQC9	0	0	0	0	0	0	Cell projection, cilium, flagellum.
P24588	0	0	0	0	0	0	Membrane; Lipid-anchor. Note=Associates with
Q13023	0	0	0	0	0	0	Sarcoplasmic reticulum. Nucleus membrane.
O43823	0	0	0	0	0	0	Nucleus matrix. Note=Associated with the
Q99996	0	0	0	0	0	0	Cytoplasm. Cytoplasm, cytoskeleton,
Q5T2L2	0	0	0	0	0	0	Cytoplasm (Potential).
Q96JD6	0	0	0	0	0	0	Cytoplasm (Potential).
Q495B1	0	0	0	0	0	0
A6NHY2	0	0	0	0	0	0
Q5TCS8	0	0	0	0	0	0
Q9P2G1	0	0	0	0	0	0
Q9NQ31	0	0	0	0	0	0	Nucleus. Note=Locates to punctate spots.
Q9JJR5	0	0	0	0	0	0	Nucleus (By similarity). Note=Locates to
Q9NWT8	0	0	0	0	0	0	Nucleus.
Q9H9L7	0	0	0	0	0	0	Nucleus.
Q53H80	0	0	0	0	0	0	Nucleus.
Q7Z591	0	0	0	0	0	0	Nucleus.
Q5T1N1	0	0	0	0	0	0
Q8WP21	0	0	0	0	0	0
Q12802	0	0	0	0	0	0	Cytoplasm. Nucleus. Membrane.
Q9ULX6	0	0	0	0	0	0	Nucleus matrix. Cytoplasm. Note=Colocalizes
P0CS67	0	0	0	0	6	0	Early endosome membrane; Multi-pass membrane
P0CS66	0	0	0	0	6	0	Early endosome membrane; Multi-pass membrane
P31749	0	2	0	0	0	0	Cytoplasm. Nucleus. Cell membrane.
P31750	0	2	0	0	0	0	Cytoplasm. Nucleus. Cell membrane (By
P47196	0	2	0	0	0	0	Cytoplasm (By similarity). Nucleus (By
P31751	0	2	0	0	0	0	Cytoplasm. Nucleus. Cell membrane;
Q9Y243	0	2	0	0	0	0	Nucleus. Cytoplasm. Membrane; Peripheral
Q9WUA6	0	2	0	0	0	0	Nucleus (By similarity). Cytoplasm.
Q9H8T0	0	0	0	0	0	0	Cytoplasm. Cell membrane; Peripheral
Q96B36	0	0	0	0	0	0	Cytoplasm, cytosol (By similarity).
Q9ZJZ7	0	0	0	0	0	0
O60022	1	2	0	0	0	0	Secreted (Potential).
P15437	0	0	0	0	0	0	Cytoplasm.
P00352	0	0	0	0	0	0	Cytoplasm.
O94788	0	0	0	0	0	0	Cytoplasm.
P47895	0	0	0	0	0	0	Cytoplasm (By similarity).
P30837	0	0	0	0	0	0	Mitochondrion matrix.
O75891	0	0	0	0	0	0	Cytoplasm.
Q3SY69	0	0	0	0	0	0	Mitochondrion.
Q60I27	0	0	0	0	0	0	Cytoplasm. Note=Distributed onto the
Q60I26	0	0	0	0	0	0	Cytoplasm. Note=Distributed onto the
Q8N187	0	0	0	0	0	0	Nucleus (Potential).
Q53TS8	0	0	0	0	0	0
Q96Q35	0	0	0	0	0	0
P30838	0	0	0	0	0	0	Cytoplasm.
P51648	0	0	0	0	1	0	Endoplasmic reticulum membrane; Single-pass
P43353	0	0	0	0	0	0
Q80VQ0	0	0	0	0	0	0
P48448	0	0	0	0	0	0
P30038	0	0	0	0	0	0	Mitochondrion matrix.
P20292	0	0	0	0	4	0	Nucleus membrane; Multi-pass membrane
P49419	0	0	0	0	0	0	Mitochondrion. Nucleus. Isoform 2
Q64057	0	0	0	0	0	0	Nucleus (By similarity). Cytoplasm, cytosol
Q9H2A2	0	0	0	0	0	0	Cytoplasm (By similarity).
P49189	0	0	0	0	0	0	Cytoplasm (By similarity).
Q9JLJ2	0	0	0	0	0	0	Cytoplasm (By similarity).
Q9JLJ3	0	0	0	0	0	0	Cytoplasm.
P24298	0	0	0	0	0	0	Cytoplasm.
Q8TD30	0	0	0	0	0	0
Q2NHL8	0	0	0	0	0	0	Cytoplasm (Probable). Chromosome (Probable).
P85982	0	0	0	0	0	0	Secreted.
P02769	1	17	0	0	0	0	Secreted.
P49822	1	17	0	0	0	0	Secreted.
P19121	1	17	1	0	0	0	Secreted.
P49064	1	17	0	0	0	0	Secreted.
P35747	1	17	0	0	0	0	Secreted.
P02768	1	17	24	0	0	0	Secreted.
P02770	1	17	0	0	0	0	Secreted.
P81496	0	0	0	0	0	0	Secreted.
Q4L803	0	0	0	0	0	0
Q4L919	0	0	0	0	0	0
P05091	0	0	0	0	0	0	Mitochondrion matrix.
P42041	0	0	0	0	0	0	Cytoplasm (Probable).
P40108	0	0	0	0	0	0	Cytoplasm (Probable).
P04075	0	0	0	0	0	0
A5A6I5	0	0	0	0	0	0
P05062	0	0	0	0	0	0
P09972	0	0	0	0	0	0
P15121	0	0	0	0	0	0	Cytoplasm.
P84996	0	0	0	0	0	0	Cell membrane; Peripheral membrane protein.
Q4L9B6	0	0	0	0	0	0
Q9URB4	0	0	0	0	0	0	Cytoplasm.
P0CJ44	0	0	0	0	0	0
Q9GP32	0	0	0	0	0	0
Q9ZMQ6	0	0	0	0	0	0
Q7KQL9	0	0	0	0	0	0
P14223	0	0	0	0	0	0
Q2TAA5	0	0	2	0	2	0	Endoplasmic reticulum. Endoplasmic reticulum
Q5R7Z6	0	0	1	0	2	0	Endoplasmic reticulum membrane; Multi-pass
P53954	0	0	4	0	1	0	Endoplasmic reticulum membrane; Single-pass
Q9BV10	0	0	0	0	12	0	Endoplasmic reticulum membrane; Multi-pass
P0CN89	0	0	0	0	0	0	Endoplasmic reticulum (By similarity).
P0CN88	0	0	0	0	0	0	Endoplasmic reticulum (By similarity).
Q9NP73	0	0	0	0	0	0	Isoform 2
P0CM11	0	0	0	0	1	0	Endoplasmic reticulum membrane; Single-pass
P0CM10	0	0	0	0	1	0	Endoplasmic reticulum membrane; Single-pass
Q96F25	0	0	0	0	1	0	Endoplasmic reticulum membrane; Single-pass
Q6GMV1	0	0	0	0	0	0
Q9BT22	0	0	0	0	1	0	Endoplasmic reticulum membrane; Single-pass
Q9H553	0	0	0	0	1	0	Membrane; Single-pass membrane protein
P0CN93	0	0	0	0	10	0	Endoplasmic reticulum membrane; Multi-pass
P0CN92	0	0	0	0	10	0	Endoplasmic reticulum membrane; Multi-pass
Q92685	0	0	0	0	11	0	Endoplasmic reticulum membrane; Multi-pass
Q9Y673	0	0	1	0	1	0	Endoplasmic reticulum membrane; Single-pass
Q9Y672	0	0	0	0	11	0	Endoplasmic reticulum membrane; Multi-pass
Q1DJR8	0	0	0	0	13	0	Endoplasmic reticulum membrane; Multi-pass
Q9BVK2	0	0	0	0	11	0	Endoplasmic reticulum membrane; Multi-pass
Q9H6U8	0	0	2	0	8	0	Endoplasmic reticulum membrane; Multi-pass
Q13686	0	0	0	0	0	0	Mitochondrion. Nucleus (By similarity).
P0CB42	0	0	0	0	0	0	Nucleus. Mitochondrion (By similarity).
Q6NS38	0	0	0	0	0	0	Nucleus. Note=Detected in replication foci
Q96Q83	0	0	0	0	0	0	Cytoplasm. Nucleus.
Q9NXW9	0	0	0	0	0	0	Cytoplasm. Nucleus.
Q6P6C2	0	0	0	0	1	0	Membrane; Single-pass membrane protein
Q3KRA9	0	0	0	0	0	0	Cytoplasm. Nucleus.
Q9BT30	1	0	0	0	0	0	Cytoplasm. Nucleus. Secreted (Potential).
Q96BT7	0	0	0	0	0	0	Cytoplasm. Nucleus. Note=Predominantly
Q95K79	0	0	0	0	0	0	Cytoplasm (By similarity). Nucleus (By
P05050	0	0	0	0	0	0
Q6ZNB7	0	0	0	0	5	0	Endoplasmic reticulum membrane; Multi-pass
Q9UM73	1	0	16	0	1	0	Cell membrane; Single-pass type I membrane
P43237	1	0	1	0	0	0
P43238	1	0	1	0	0	0
Q17282	1	1	0	0	0	0
P49372	0	0	0	0	0	0
Q84ZX5	1	4	0	0	0	0	Secreted (By similarity).
P82257	0	0	0	0	0	0
P80207	0	0	0	0	0	0
O18873	1	1	1	0	0	0	Secreted.
Q95182	1	1	2	0	0	0	Secreted.
P86712	0	0	0	0	0	0
P19963	0	3	1	0	0	0	Secreted.
P82944	0	0	0	0	0	0
P15322	0	0	0	0	0	0
Q9U5P7	0	0	0	0	0	0	Secreted.
P81216	0	0	0	0	0	0	Secreted (Potential).
Q9NFQ4	0	0	0	0	0	0	Secreted.
P81217	0	0	0	0	0	0	Secreted (Potential).
P18153	1	0	0	0	0	0	Secreted.
P92918	0	0	0	0	0	0
Q7M1G9	0	0	0	0	0	0
P82258	0	0	0	0	0	0
P79017	1	0	4	0	0	0	Secreted. Note=Cell-associated.
Q28133	1	2	0	0	0	0	Secreted.
O18874	1	1	1	0	0	0	Secreted.
Q00855	1	3	0	0	0	0	Secreted.
P49278	1	3	0	0	0	0	Secreted.
Q9TZZ2	1	3	0	0	0	0	Secreted (By similarity).
P80384	1	3	0	0	0	0	Secreted.
P82952	0	0	0	0	0	0
Q965E2	1	3	0	0	0	0	Secreted.
O02380	1	3	1	0	0	0	Secreted.
O01949	1	0	0	0	0	0	Secreted (Potential).
P82259	0	0	0	0	0	0
O60024	1	0	0	0	0	0	Secreted (Probable).
Q5VFH6	1	1	2	0	0	0	Secreted.
P80741	0	0	0	0	0	0
P82947	0	0	0	0	0	0
P81943	0	0	1	0	0	0
O96870	0	0	0	0	0	0
P14004	0	0	0	0	0	0
Q39967	0	0	0	0	0	0
Q9U5P2	0	0	0	0	0	0
P83563	0	5	0	0	0	0	Secreted, extracellular space.
O24172	0	3	0	0	0	0
O42799	1	0	0	0	0	0
Q26456	1	0	1	0	0	0	Secreted.
P49273	1	0	1	0	0	0	Secreted.
Q9U1G2	1	0	0	0	0	0	Secreted.
P81430	0	0	0	0	0	0
Q9M7R0	0	0	0	0	0	0
A1A8H1	0	0	0	0	0	0
Q5PCF4	0	0	0	0	0	0
P43187	0	0	0	0	0	0
A1A8H7	0	0	0	0	0	0
Q5PCG0	0	0	0	0	0	0
Q8N6M5	0	0	0	0	0	0
Q9JHX6	0	0	0	0	0	0
P85063	0	0	0	0	0	0
A1A8H2	0	0	0	0	0	0
Q5PCF5	0	0	0	0	0	0
A1A8H0	0	0	0	0	0	0
Q5PCH2	0	0	0	0	0	0
Q96L16	0	0	0	0	0	0
Q8TCU4	0	0	0	0	0	0	Cytoplasm. Cytoplasm, cytoskeleton,
Q8K4E0	0	0	0	0	0	0	Cytoplasm (By similarity). Cytoplasm,
Q9HCF4	0	0	0	0	0	0
Q96QP1	0	0	0	0	0	0
Q86TB3	0	2	0	0	0	0
Q96L96	0	1	0	0	0	0	Nucleus (By similarity).
A7ZCL1	0	0	0	0	0	0
A7GZM8	0	0	0	0	0	0
A7H3E3	0	0	0	0	0	0
A0Q5X2	0	0	0	0	0	0
Q9ZKQ9	0	0	0	0	0	0
P55789	0	4	0	0	0	0	Isoform 1
B9E8C3	0	0	0	0	0	0
Q6A5H2	0	0	0	0	0	0
Q8DY10	0	0	0	0	0	0
C0M6I5	0	0	0	0	0	0
Q1JA50	0	0	0	0	0	0
Q1JKA0	0	0	0	0	0	0
Q1JF94	0	0	0	0	0	0
Q1J545	0	0	0	0	0	0
C0MEB7	0	0	0	0	0	0
Q96Q42	0	0	0	0	0	0
Q5BIW4	0	0	0	0	0	0
P35858	1	0	6	0	0	0	Secreted, extracellular space.
P79085	1	0	0	0	0	0	Secreted.
Q5EZC5	1	0	0	0	0	0	Secreted (By similarity).
Q5EZ82	1	0	0	0	0	0	Secreted (By similarity).
O94095	0	0	0	0	0	0
P42058	0	0	0	0	0	0	Cytoplasm (Probable).
C6KTB7	0	0	0	0	8	0	Membrane; Multi-pass membrane protein
Q15699	0	0	0	0	0	0	Nucleus.
O95076	0	0	0	0	0	0	Nucleus (By similarity).
Q9H161	0	0	0	0	0	0	Nucleus.
Q9UHK6	0	0	0	0	0	0	Peroxisome. Mitochondrion.
Q9NP70	1	0	0	0	0	0	Secreted, extracellular space, extracellular
P02760	1	7	3	2	0	0	Secreted.
P22952	1	2	0	0	0	0	Secreted.
P19021	1	7	1	0	1	0	Isoform 1
Q99217	1	0	0	0	0	0	Secreted, extracellular space, extracellular
Q99218	1	0	0	0	0	0	Secreted, extracellular space, extracellular
Q9Y4X0	0	0	0	0	0	0
Q6DCA0	0	0	0	0	0	0
P26442	1	0	1	0	1	0	Membrane; Single-pass type I membrane
Q9UKV5	0	0	0	0	7	0	Endoplasmic reticulum membrane; Multi-pass
Q86WK6	1	1	5	0	1	0	Membrane; Single-pass type I membrane
Q86SJ2	1	1	8	0	1	0	Cell membrane; Single-pass type I membrane
Q86WK7	1	1	5	0	1	0	Membrane; Single-pass type I membrane
Q16671	1	0	2	0	1	0	Membrane; Single-pass type I membrane
Q9K0V3	1	0	0	0	0	0	Periplasm (By similarity).
Q9ZME1	0	0	0	0	0	0
Q9ZJY8	0	0	0	0	0	0
P85004	0	0	0	0	0	0
Q8IY45	0	0	0	0	0	0
Q9BXJ7	1	0	1	0	1	0	Membrane; Single-pass type I membrane
Q8IY63	0	0	0	0	0	0
Q9Y2J4	0	0	0	0	0	0
Q4VCS5	0	0	0	0	0	0	Cell junction, tight junction.
Q6UB28	0	0	0	0	0	0	Mitochondrion.
P25403	1	3	0	0	0	0	Secreted.
P0CH48	0	0	0	0	0	0	Secreted.
P0CF39	0	4	0	0	0	0	Secreted.
P25404	1	3	0	0	0	0	Secreted.
P0CH49	0	0	0	0	0	0	Secreted.
P0CF37	0	4	0	0	0	0	Secreted.
A1AJG3	0	0	0	0	0	0	Cytoplasm (By similarity).
Q9ZLR1	0	0	0	0	0	0	Cytoplasm (By similarity).
Q6A9W5	0	0	0	0	0	0	Cytoplasm (By similarity).
Q5PJD4	0	0	0	0	0	0	Cytoplasm (By similarity).
Q83G32	0	0	0	0	0	0	Cytoplasm (By similarity).
Q9H4A4	0	0	0	0	0	0	Secreted (By similarity).
P23109	0	0	0	0	0	0
Q01433	0	0	0	0	0	0
Q01432	0	0	0	0	0	0
Q07075	0	0	14	0	1	0	Membrane; Single-pass type II membrane
P49418	0	0	0	0	0	0	Cytoplasmic vesicle, secretory vesicle,
P28838	0	0	0	0	0	0	Cytoplasm.
P53582	0	0	0	0	0	0
A6RGC8	0	0	0	0	0	0	Cytoplasm (By similarity).
C5P8Q4	0	0	0	0	0	0	Cytoplasm (By similarity).
P50579	0	0	0	2	0	0	Cytoplasm. Note=About 30% of expressed
A8QBZ2	0	0	0	0	0	0	Cytoplasm (By similarity).
C4JSX6	0	0	0	0	0	0	Cytoplasm (By similarity).
Q9ZJT0	0	0	0	0	0	0
P79098	0	0	10	0	1	0	Membrane; Single-pass type II membrane
P79143	0	0	3	0	0	0	Membrane; Single-pass type II membrane
P79171	0	0	8	0	1	0	Membrane; Single-pass type II membrane
P15144	0	0	10	0	1	0	Cell membrane; Single-pass type II membrane
Q8N6M6	0	0	0	0	0	0	Cytoplasm (Potential).
Q8BXQ6	0	0	0	0	0	0	Cytoplasm (Potential).
P69527	0	0	0	0	0	0	Cytoplasm (Potential).
A6R035	0	0	0	0	0	0
C5P7J2	0	0	0	0	0	0
A6QYF6	0	0	0	0	0	0
C5PAH2	0	0	0	0	0	0
C4JY72	0	0	0	0	0	0
C5PHM7	0	0	0	0	0	0
C4JF09	0	0	0	0	0	0
Q6Q4G3	0	0	8	0	1	0	Membrane; Single-pass type II membrane
P85072	0	4	3	0	0	0	Secreted (Probable).
P85073	0	4	3	0	0	0	Secreted (Probable).
P85074	0	4	3	0	0	0	Secreted (Probable).
P85075	0	4	3	0	0	0	Secreted (Probable).
O24006	1	12	0	0	0	0	Secreted.
Q9C0C7	0	0	0	0	0	0	Cytoplasmic vesicle, autophagosome (By
P30533	1	0	1	0	0	0	Endoplasmic reticulum. Cytoplasm. Cell
Q6UX39	1	0	0	0	0	0	Secreted (Probable).
P04745	1	5	2	0	0	0	Secreted.
P19961	1	5	0	0	0	0	Secreted (By similarity).
P22861	1	0	11	0	0	0
P04746	1	5	1	0	0	0	Secreted, extracellular space.
P49274	0	0	0	0	0	0	Secreted.
Q400G9	0	0	0	0	0	0
Q8BVF9	0	0	0	0	0	0
Q400C9	0	0	0	0	0	0
Q86W34	0	0	0	0	0	0
Q400C8	0	0	0	0	0	0
Q400C7	0	0	0	0	0	0
Q8IZ07	0	0	0	0	0	0
Q86YJ7	0	0	0	0	0	0
Q8N6S4	0	0	0	0	0	0	Endoplasmic reticulum membrane.
Q6ZTN6	0	0	0	0	0	0
Q8IVF6	0	0	0	0	0	0
A2A2Z9	0	0	0	0	0	0
Q5CZ79	0	0	0	0	0	0
Q9BXX3	0	0	0	0	0	0
Q9BXX2	0	0	0	0	0	0
P39687	0	0	0	0	0	0	Nucleus. Cytoplasm. Endoplasmic reticulum.
Q92688	0	0	0	0	0	0	Isoform 1
O43423	0	0	0	0	0	0
O95626	0	0	0	0	0	0
Q9BTT0	0	0	0	0	0	0	Cytoplasm (By similarity). Nucleus (By
Q8ILI6	0	0	0	0	0	0
A6NCL7	0	0	0	0	0	0
Q69YU3	0	0	0	0	0	0
A5PLL1	0	0	0	0	0	0	Cytoplasm. Nucleus (By similarity).
P0C6C1	0	0	0	0	0	0
A6QL64	0	0	0	0	0	0
Q8N2N9	0	0	0	0	0	0
Q5JPF3	0	0	0	0	0	0
Q9ZJD1	0	0	0	0	1	0	Membrane; Single-pass membrane protein
P54802	1	0	6	0	0	0	Lysosome.
Q7M0J9	0	0	0	0	0	0	Secreted (Probable).
Q9UJX6	0	0	0	0	0	0
Q9GKW8	0	0	0	0	0	0
Q9TT90	0	0	0	0	0	0	Nucleus (By similarity). Cytoplasm (By
P10275	0	0	0	0	0	0	Nucleus. Cytoplasm. Note=Predominantly
P15207	0	0	0	0	0	0	Nucleus. Cytoplasm (By similarity).
P84715	1	0	0	0	0	0	Secreted.
P16859	1	1	0	0	0	0	Secreted.
P16860	1	1	0	0	0	0	Secreted.
P23582	1	1	0	0	0	0	Secreted.
Q61839	1	1	0	0	0	0	Secreted.
Q9P2R3	0	0	0	0	0	0	Cytoplasm. Endosome membrane; Peripheral
P01160	1	1	0	0	0	0	Secreted.
P05125	1	1	0	0	0	0	Secreted.
P01161	1	1	0	0	0	0	Secreted.
Q9UNK9	0	0	0	0	0	0
Q5VTE6	0	0	0	0	0	0
P03950	1	3	0	0	0	0	Secreted.
O95841	1	2	2	0	0	0	Secreted.
Q9UKU9	1	2	2	0	0	0	Secreted.
Q9Y5C1	1	2	3	0	0	0	Secreted (By similarity).
Q9BY76	1	2	1	0	0	0	Secreted. Secreted, extracellular space,
Q86XS5	1	2	3	0	0	0	Secreted (Potential).
Q8NI99	1	2	2	0	0	0	Secreted (Probable).
O43827	1	2	3	0	0	0	Secreted (Probable).
Q15389	1	2	5	0	0	0	Secreted.
O15123	1	3	6	0	0	0	Secreted.
Q9Y264	1	2	9	0	0	0	Secreted (Probable).
Q9TSZ0	1	0	4	0	0	0	Secreted.
P01019	1	0	4	0	0	0	Secreted.
Q9GLN8	1	0	4	0	0	0	Secreted (By similarity).
Q02219	1	0	0	0	0	0	Cell outer membrane; Lipid-anchor
Q7Z1K3	1	3	0	0	0	0	Secreted.
P83885	0	0	0	0	0	0	Secreted.
P16157	0	0	0	0	0	0	Isoform Er1
Q01484	0	0	0	0	0	0	Cytoplasm, cytoskeleton. Membrane.
Q8C8R3	0	0	0	0	0	0	Cytoplasm, cytoskeleton (By similarity).
Q12955	0	0	0	0	0	0	Cytoplasm, cytoskeleton.
Q7Z5J8	0	0	0	0	1	0	Membrane; Single-pass membrane protein
Q8N957	0	0	0	0	0	0
Q8IWZ3	0	0	0	0	0	0	Cytoplasm.
P58368	0	0	0	0	8	0	Membrane; Multi-pass membrane protein (By
Q06527	1	0	0	0	0	0
Q9HCJ1	0	0	0	0	8	0	Membrane; Multi-pass membrane protein
P58369	0	0	0	0	9	0	Membrane; Multi-pass membrane protein (By
P58367	0	0	0	0	8	0	Membrane; Multi-pass membrane protein (By
Q8NFD2	0	0	0	0	0	0
Q8NAG6	0	0	0	0	0	0
Q86XL3	0	0	0	0	1	0	Membrane; Single-pass membrane protein
Q15327	0	0	0	0	0	0	Nucleus.
Q9GZV1	0	0	0	0	0	0
Q9NU02	0	0	0	0	0	0
Q9Y2G4	0	0	0	0	0	0
Q92527	0	0	0	0	0	0
Q96BM1	0	0	0	0	0	0
Q6ZW76	0	0	0	0	0	0
Q68DC2	0	0	0	0	0	0
A6NFN9	0	0	0	0	0	0
Q9P2S6	0	0	0	0	0	0
Q8IV38	0	0	0	0	0	0	Cell projection, cilium (By similarity).
Q9H8Y5	0	0	0	0	0	0
Q9NQW6	0	0	0	0	0	0	Nucleus. Cytoplasm, cytoskeleton. Cytoplasm,
Q6P2P2	0	0	0	0	0	0
Q99873	0	0	0	0	0	0	Nucleus. Cytoplasm, cytosol (By similarity).
P55345	0	0	0	0	0	0	Cytoplasm. Nucleus. Note=Translocates from
O60678	0	0	0	0	0	0	Cytoplasm.
Q9U6Y9	0	0	0	0	0	0	Cytoplasm (Probable).
O14744	0	0	0	0	0	0	Cytoplasm. Nucleus.
Q8CIG8	0	0	0	0	0	0	Cytoplasm (By similarity). Nucleus (By
Q96LA8	0	0	0	0	0	0	Nucleus.
Q9NVM4	0	0	0	0	0	0	Cytoplasm, cytosol. Nucleus.
Q9NR22	0	0	0	0	0	0	Cell membrane; Lipid-anchor; Cytoplasmic
Q184N9	0	0	0	0	0	0
A1ABI5	0	0	0	0	0	0
A0Q7I7	0	0	0	0	0	0
B4RCQ8	0	0	0	0	0	0
Q5PIK4	0	0	0	0	0	0
Q9NW15	0	0	0	0	8	0	Membrane; Multi-pass membrane protein
Q5XXA6	0	0	1	0	8	0	Cell membrane; Multi-pass membrane protein.
Q9NQ90	0	0	4	0	8	0	Cell membrane; Multi-pass membrane protein
Q9BYT9	0	0	4	0	8	0	Membrane; Multi-pass membrane protein
Q32M45	0	0	4	0	8	0	Membrane; Multi-pass membrane protein
Q8C5H1	0	0	3	0	8	0	Membrane; Multi-pass membrane protein
Q75V66	0	0	6	0	8	0	Endoplasmic reticulum membrane; Multi-pass
Q4KMQ2	0	0	6	0	8	0	Membrane; Multi-pass membrane protein
Q6IWH7	0	0	2	0	8	0	Isoform 1
Q9HCE9	0	0	0	0	8	0	Membrane; Multi-pass membrane protein
A1A5B4	0	0	4	0	8	0	Membrane; Multi-pass membrane protein
P0C005	0	0	0	0	0	0	Secreted.
P16066	1	3	7	0	1	0	Membrane; Single-pass type I membrane
P20594	1	3	7	0	1	0	Membrane; Single-pass type I membrane
P17342	1	3	3	0	1	0	Membrane; Single-pass type I membrane
P41740	1	3	3	0	1	0	Membrane; Single-pass type I membrane
Q9NXR5	0	0	0	0	0	0
Q6UB99	0	0	0	0	0	0	Nucleus.
Q6UB98	0	0	0	0	0	0	Nucleus.
Q6P6B7	0	0	0	0	0	0
O75179	0	0	0	0	0	0	Cytoplasm. Nucleus. Note=Detected around the
Q9H560	0	0	0	0	0	0
Q5VYY1	0	0	0	0	0	0
Q86SG2	0	0	0	0	0	0	Nucleus. Note=Sarcomeric I-band and some
Q8TF21	0	0	0	0	0	0
Q9UPS8	0	0	0	0	0	0
Q96NW4	0	0	0	0	0	0	Cytoplasm. Note=Mainly localized to early
O15084	0	0	0	0	0	0	Nucleus, nucleoplasm. Note=Seems to be
Q8N6D5	0	0	0	0	0	0
Q8N7Z5	0	0	0	0	0	0
Q9BQI6	0	0	0	0	0	0
Q7Z3H0	0	0	0	0	0	0
Q8N283	0	0	0	0	0	0
Q7Z713	0	0	0	0	0	0	Nucleus. Cytoplasm.
Q53RE8	0	0	0	0	0	0
Q6AI12	0	0	0	0	0	0
Q8N9B4	0	0	0	0	0	0
Q2M3V2	1	0	0	0	0	0
Q8N8A2	0	0	0	0	0	0
Q5TZF3	0	0	0	0	0	0
Q86W74	0	0	0	0	1	0	Membrane; Single-pass membrane protein
Q76K24	0	0	0	0	1	0	Membrane; Single-pass membrane protein
Q8WVL7	0	0	0	0	0	0
Q8VE42	0	0	0	0	0	0
Q9ULJ7	0	0	0	0	0	0
Q8NB46	0	0	0	0	0	0
Q8N9V6	0	0	0	0	0	0
Q6NXT1	0	0	0	0	0	0
Q3KP44	0	0	0	0	0	0
A6NEL2	0	0	0	0	0	0
Q53LP3	0	0	0	0	0	0
A6NJG2	0	0	0	0	0	0
Q9BZ19	0	0	0	0	0	0
A6NGH8	0	0	0	0	0	0
A6NC57	0	0	0	0	0	0
C9JTQ0	0	0	0	0	0	0
E5RJM6	0	0	0	0	0	0
Q9H9E1	0	0	0	0	0	0	Cytoplasm, cytoskeleton (By similarity).
P61109	1	0	0	0	0	0	Secreted (Potential).
Q92625	0	0	0	0	0	0	Cytoplasm. Cell projection (By similarity).
Q7Z6G8	0	0	0	0	0	0	Cytoplasm. Isoform 2
Q8N8V4	0	0	0	0	0	0
Q02550	0	0	0	0	0	0
P01008	1	3	4	0	0	0	Secreted, extracellular space.
Q9H6X2	1	1	3	0	1	0	Cell membrane; Single-pass type I membrane
P58335	1	1	2	0	1	0	Isoform 1
A6NF34	1	0	0	0	1	0	Membrane; Single-pass type I membrane
Q86XD8	0	0	0	0	0	0
Q9UJ72	0	0	0	0	0	0
Q9QZ10	0	0	0	0	0	0
P50995	0	0	0	0	0	0	Cytoplasm. Melanosome. Nucleus envelope.
P27216	0	0	0	0	0	0	Cell membrane. Note=Associated with the
P04083	0	0	0	0	0	0	Nucleus (By similarity). Cytoplasm (By
A5A6M2	0	0	0	0	0	0	Nucleus (By similarity). Cytoplasm (By
P07150	0	0	0	0	0	0	Nucleus (By similarity). Cytoplasm (By
P04272	0	0	0	0	0	0	Secreted, extracellular space, extracellular
P07355	0	0	0	0	0	0	Secreted, extracellular space, extracellular
P07356	0	0	0	0	0	0	Secreted, extracellular space, extracellular
P12429	0	0	0	0	0	0
P09525	0	0	0	0	0	0
P08758	0	0	0	0	0	0
P08133	0	0	0	0	0	0	Cytoplasm (By similarity). Melanosome.
P20073	0	0	0	0	0	0
P13928	0	0	0	0	0	0
A5A6L7	0	0	0	0	0	0
O76027	0	0	0	0	0	0
Q1HVE7	0	0	0	0	0	0
P03217	0	0	0	0	0	0
Q3KSR5	0	0	0	0	0	0
P16789	0	0	0	0	0	0
P04294	0	0	0	0	0	0	Isoform UL12
P06489	0	0	0	0	0	0	Host nucleus (By similarity).
P24447	0	0	0	0	0	0
P52448	0	0	0	0	0	0
P52346	0	0	0	0	0	0
P09253	0	0	0	0	0	0	Host nucleus (By similarity).
Q4JQS7	0	0	0	0	0	0	Host nucleus (By similarity).
P28039	1	3	5	0	0	0	Secreted.
O35298	1	3	4	0	0	0	Secreted (By similarity).
O18823	1	3	4	0	0	0	Secreted (By similarity).
O75106	1	0	5	0	0	0	Isoform 1
Q16853	0	3	6	1	1	0	Membrane; Single-pass type II membrane
P21397	0	0	0	0	1	0	Mitochondrion outer membrane; Single-pass
P21396	0	0	0	0	1	0	Mitochondrion outer membrane; Single-pass
P56560	0	0	0	0	1	0	Mitochondrion outer membrane; Single-pass
P27338	0	0	0	0	1	0	Mitochondrion outer membrane; Single-pass
Q8A1E9	0	0	0	0	0	0	Cytoplasm (Probable).
O60641	0	0	0	0	0	0	Cell membrane (By similarity). Membrane,
Q63HQ0	0	0	1	0	0	0	Golgi apparatus, trans-Golgi network. Late
Q10567	0	0	0	0	0	0	Golgi apparatus. Cytoplasmic vesicle,
P52303	0	0	0	0	0	0	Golgi apparatus. Cytoplasmic vesicle,
O43747	0	0	0	0	0	0	Golgi apparatus. Cytoplasmic vesicle,
O75843	0	0	0	0	0	0	Golgi apparatus membrane; Peripheral
Q9BXS5	0	0	0	0	0	0	Golgi apparatus. Cytoplasmic vesicle,
Q9Y6Q5	0	0	0	0	0	0	Golgi apparatus. Cytoplasmic vesicle,
P61966	0	0	0	0	0	0	Golgi apparatus. Cytoplasmic vesicle
P56377	0	0	0	0	0	0	Golgi apparatus. Cytoplasmic vesicle
Q96PC3	0	0	0	0	0	0	Golgi apparatus. Cytoplasmic vesicle
O95782	0	0	0	0	0	0	Cell membrane (By similarity). Membrane,
O94973	0	0	0	0	0	0	Cell membrane (By similarity). Membrane,
P05549	0	0	0	0	0	0	Nucleus.
Q8I1N6	0	0	0	0	0	0	Nucleus (Probable).
P58197	0	0	0	0	0	0	Nucleus.
P63010	0	0	0	0	0	0	Cell membrane. Membrane, coated pit;
Q92481	0	0	0	0	0	0	Nucleus (Probable).
Q92754	0	0	0	0	0	0	Nucleus (Probable).
Q7Z6R9	0	0	0	0	0	0	Nucleus (Probable).
Q6VUC0	0	0	0	0	0	0	Nucleus (By similarity).
Q96CW1	0	0	0	0	0	0	Cell membrane. Membrane, coated pit;
P53680	0	0	0	0	0	0	Cell membrane. Membrane, coated pit;
P59632	0	0	0	4	3	0	Virion. Host Golgi apparatus membrane;
O00203	0	0	0	0	0	0	Golgi apparatus. Cytoplasmic vesicle,
Q13367	0	0	0	0	0	0	Golgi apparatus. Cytoplasmic vesicle,
O14617	0	0	0	0	0	0	Cytoplasm (By similarity). Golgi apparatus
Q9Y2T2	0	0	0	0	0	0	Golgi apparatus.
P53677	0	0	0	0	0	0	Golgi apparatus.
Q92572	0	0	0	0	0	0	Golgi apparatus. Cytoplasmic vesicle
P59780	0	0	0	0	0	0	Golgi apparatus. Cytoplasmic vesicle
P50583	0	0	0	0	0	0
Q9Y6B7	0	0	0	0	0	0	Golgi apparatus, trans-Golgi network.
Q9UPM8	0	0	0	0	0	0	Golgi apparatus, trans-Golgi network.
O00189	0	0	0	0	0	0	Golgi apparatus, trans-Golgi network.
Q9Y587	0	0	0	0	0	0	Golgi apparatus, trans-Golgi network.
Q2VPB7	0	0	0	0	0	0
O14727	0	0	0	0	0	0	Cytoplasm.
A1A799	0	0	0	0	0	0
Q5PDE0	0	0	0	0	0	0
A1A798	0	0	0	0	0	0
Q5PDE1	0	0	0	0	0	0
Q02410	0	0	0	0	0	0
Q99767	0	0	0	0	0	0
P98084	0	0	0	0	0	0
O96018	0	0	0	0	0	0
O00213	0	0	0	0	0	0	Cell membrane. Cytoplasm. Nucleus. Cell
Q9QXJ1	0	0	0	0	0	0	Cell membrane. Cytoplasm. Nucleus. Cell
Q92870	0	0	0	0	0	0
O95704	0	0	0	0	0	0
Q92624	0	0	0	0	0	0	Nucleus. Cytoplasm, cytoskeleton. Membrane;
Q9UM13	0	0	0	0	0	0
Q9NYG5	0	0	0	0	0	0	Cytoplasm. Nucleus.
Q9BS18	0	0	0	0	0	0	Nucleus (Probable).
Q96DE5	0	0	0	0	0	0	Cytoplasm. Nucleus.
Q9CPV2	0	0	0	0	0	0	Cytoplasm. Nucleus.
Q9H1A4	0	0	0	0	0	0
O95996	0	0	0	0	0	0	Cytoplasm, cytoskeleton. Golgi apparatus
Q9UJX5	0	0	0	0	0	0
Q9UJX4	0	0	0	0	0	0
Q9UJX3	0	0	0	0	0	0
Q8J025	1	0	3	0	1	0	Cell membrane; Single-pass type I membrane
Q8NCL9	1	0	1	0	1	0	Membrane; Single-pass membrane protein
P25054	0	0	0	0	0	0	Cell junction, adherens junction. Cytoplasm,
Q61315	0	0	0	0	0	0	Cell junction, adherens junction (By
Q9TUI9	1	0	0	0	0	0	Secreted.
Q9ULZ1	1	0	0	0	0	0	Secreted.
A1YES6	0	1	0	0	0	0	Nucleus. Nucleus, nucleolus (By similarity). DNA-(apurinic or apyrimidinic site) lyase,
P27695	0	1	0	0	0	0	Nucleus. Nucleus, nucleolus. Nucleus DNA-(apurinic or apyrimidinic site) lyase,
A1YFZ3	0	1	0	0	0	0	Nucleus. Nucleus, nucleolus (By similarity). DNA-(apurinic or apyrimidinic site) lyase,
A2T6Y4	0	1	0	0	0	0	Nucleus. Nucleus, nucleolus (By similarity). DNA-(apurinic or apyrimidinic site) lyase,
A2T7I6	0	1	0	0	0	0	Nucleus. Nucleus, nucleolus (By similarity). DNA-(apurinic or apyrimidinic site) lyase,
Q9UBZ4	0	0	0	0	0	0	Nucleus. Cytoplasm. Mitochondrion
P80474	0	0	0	0	0	0
A5UKY4	0	0	0	0	0	0
Q2NES7	0	0	0	0	0	0
Q96BI3	0	0	0	0	7	0	Endoplasmic reticulum membrane; Multi-pass
Q8WW43	0	0	0	0	7	0	Membrane; Multi-pass membrane protein
D2TRT2	1	0	0	0	0	0	Periplasm (By similarity).
P16348	0	2	1	0	0	0	Vacuole (By similarity).
Q9BZZ5	0	0	0	0	0	0	Nucleus. Cytoplasm. Note=Mainly nuclear. Can Isoform 3
P59704	1	1	0	0	0	0	Secreted (Potential).
P35414	0	0	2	0	7	0	Cell membrane; Multi-pass membrane protein.
Q9WV08	0	0	2	0	7	0	Cell membrane; Multi-pass membrane protein.
Q9JHG3	0	0	2	0	7	0	Cell membrane; Multi-pass membrane protein.
Q96LR9	0	0	0	0	3	0	Cell membrane; Multi-pass membrane protein
A8JR14	0	0	0	0	0	0
Q8IW19	0	0	0	0	0	0	Nucleus. Cytoplasm, cytosol. Note=Localizes
P51693	1	0	3	3	1	0	Cell membrane; Single-pass type I membrane C30
Q06481	1	3	0	0	1	0	Cell membrane; Single-pass type I membrane
P15943	1	3	0	1	1	0	Membrane; Single-pass type I membrane
Q15847	0	0	0	0	0	0
Q9HDC9	0	0	2	0	1	0	Membrane; Single-pass type II membrane
P50525	0	0	0	0	0	0	Nucleus (By similarity).
P87175	0	0	0	0	0	0	Nucleus (By similarity).
P38207	0	0	0	0	0	0	Nucleus.
P0CF78	1	0	0	0	0	0	Secreted (By similarity).
P86336	0	0	0	0	0	0	Secreted (By similarity).
P0CE37	1	0	0	0	0	0	Secreted (By similarity).
P0CE39	1	0	0	0	0	0	Secreted (By similarity).
P18657	0	0	0	0	0	0	Secreted.
P0CE38	1	0	0	0	0	0	Secreted (By similarity).
P34929	1	0	0	0	0	0	Secreted.
P0CE40	1	0	0	0	0	0	Secreted (By similarity).
P02647	1	0	1	0	0	0	Secreted.
P68292	1	0	0	0	0	0	Secreted.
P02652	1	2	0	0	0	0	Secreted.
P18656	1	0	0	0	0	0	Secreted.
P09813	1	0	0	0	0	0	Secreted.
Q8MIQ5	1	0	0	0	0	0	Secreted.
P06727	1	0	0	0	0	0	Secreted.
P02651	1	0	0	0	0	0	Secreted.
Q6Q788	1	0	0	0	0	0	Secreted.
Q8C7G5	1	0	0	0	0	0	Secreted.
P08519	1	118	39	0	0	0
Q0VD83	0	0	0	0	0	0	Cell membrane; Peripheral membrane protein.
Q8VBT6	0	0	0	0	0	0	Cell membrane; Peripheral membrane protein
P04114	1	8	19	0	0	0	Secreted.
P02654	1	0	0	0	0	0	Secreted.
P19034	1	0	0	0	0	0	Secreted.
P02655	1	0	0	0	0	0	Secreted.
P18658	1	0	0	0	0	0	Secreted.
P19035	1	0	0	0	0	0	Secreted.
P02656	1	0	0	1	0	0	Secreted.
P18659	1	0	0	0	0	0	Secreted.
P55056	1	0	1	0	0	0	Secreted.
P05090	1	3	2	0	0	0	Secreted.
P18649	0	0	0	0	0	0	Secreted.
P02649	1	0	1	3	0	0	Secreted.
Q9GJU3	1	0	0	1	0	0	Secreted.
P18650	1	0	0	0	0	0	Secreted.
Q13790	1	0	1	0	0	0	Secreted.
P02749	1	11	4	1	0	0	Secreted.
Q01339	1	11	5	0	0	0	Secreted.
O14791	1	0	1	0	0	0	Secreted.
Q9BQE5	0	0	0	0	0	0	Cytoplasm (Probable).
O95236	0	0	0	0	0	0	Cytoplasm (Probable).
Q9BPW4	1	0	0	0	0	0	Secreted (Potential).
Q9BWW9	0	0	0	0	0	0	Cytoplasm (Probable).
Q9BWW8	0	0	0	0	0	0	Cytoplasm (Probable).
O95445	1	3	1	0	0	0	Secreted. Note=Present in high density
Q6UXV4	1	0	0	0	0	0	Secreted (Potential).
Q9BUR5	1	0	0	1	1	0	Membrane; Single-pass membrane protein
Q96IL0	0	0	0	0	0	0	Mitochondrion (By similarity).
Q9Y5M1	0	0	0	0	0	0
Q6UW56	1	3	4	0	1	0	Cell membrane; Single-pass membrane protein.
Q8IVJ8	0	0	0	0	1	0	Membrane; Single-pass membrane protein
Q53RT3	0	0	1	0	1	0	Membrane; Single-pass membrane protein
Q13794	0	0	0	0	0	0	Mitochondrion.
Q09790	0	0	0	0	0	0
P61541	0	3	0	0	0	0	Secreted (Probable). Nematocyst (Probable).
P0CL95	0	0	0	0	0	0	Cytoplasm (By similarity).
P0CL94	0	0	0	0	0	0	Cytoplasm (By similarity).
P61797	0	0	0	0	0	0	Nucleus, nucleoplasm (By similarity).
P61798	0	0	0	0	0	0	Nucleus, nucleoplasm (By similarity).
P61802	0	0	0	0	0	0	Nucleus, nucleoplasm (By similarity).
Q7Z2E3	0	0	0	0	0	0	RP INTERACTION WITH XRCC1 AND XRCC4, SUBCELLULAR LOCATION, AND Nucleus, nucleoplasm. Nucleus, nucleolus.
P61800	0	0	0	0	0	0	Nucleus, nucleoplasm (By similarity).
Q8A2N8	0	0	0	0	0	0	Cytoplasm.
A6KZN9	0	0	0	0	0	0	Cytoplasm (By similarity).
Q8G6B5	0	0	0	0	0	0	Cytoplasm.
A7ZCG7	0	0	0	0	0	0	Cytoplasm (By similarity).
A7GXJ2	0	0	0	0	0	0	Cytoplasm (By similarity).
A7I261	0	0	0	0	0	0	Cytoplasm (By similarity).
A7H3C4	0	0	0	0	0	0	Cytoplasm (By similarity).
Q183I0	0	0	0	0	0	0	Cytoplasm (By similarity).
Q4JVE4	0	0	0	0	0	0	Cytoplasm (By similarity).
A1A8D5	0	0	0	0	0	0	Cytoplasm (By similarity).
C4ZF43	0	0	0	0	0	0	Cytoplasm (By similarity).
A0Q8C6	0	0	0	0	0	0	Cytoplasm (By similarity).
Q0BVB8	0	0	0	0	0	0	Cytoplasm (By similarity).
Q9ZLQ9	0	0	0	0	0	0	Cytoplasm.
P07741	0	0	0	0	0	0	Cytoplasm.
B9E711	0	0	0	0	0	0	Cytoplasm (By similarity).
Q6A8K3	0	0	0	0	0	0	Cytoplasm.
Q5PFK3	0	0	0	0	0	0	Cytoplasm.
Q4L6Y0	0	0	0	0	0	0	Cytoplasm (By similarity).
Q8DZA4	0	0	0	0	0	0	Cytoplasm.
C0MAM5	0	0	0	0	0	0	Cytoplasm (By similarity).
Q1JC56	0	0	0	0	0	0	Cytoplasm (By similarity).
Q1JM38	0	0	0	0	0	0	Cytoplasm (By similarity).
Q1JH84	0	0	0	0	0	0	Cytoplasm (By similarity).
Q1J702	0	0	0	0	0	0	Cytoplasm (By similarity).
C0MDK3	0	0	0	0	0	0	Cytoplasm (By similarity).
P50635	1	0	2	0	0	0	Secreted.
E0D877	1	0	1	0	0	0	Secreted.
B3A0N5	1	0	0	0	0	0	Secreted.
Q8IXF9	0	0	0	0	6	0	Membrane; Multi-pass membrane protein
A6NM10	0	0	0	0	6	0	Membrane; Multi-pass membrane protein
Q96PS8	0	0	0	0	5	0	Membrane; Multi-pass membrane protein.
Q8NBQ7	0	0	1	0	6	0	Membrane; Multi-pass membrane protein
P29972	0	0	2	0	6	0	Membrane; Multi-pass membrane protein.
P41181	0	0	1	0	6	0	Apical cell membrane; Multi-pass membrane
Q92482	0	0	1	0	6	0	Basolateral cell membrane; Multi-pass
P55087	0	0	2	0	6	0	Membrane; Multi-pass membrane protein.
P55064	0	0	2	0	6	0	Membrane; Multi-pass membrane protein.
Q13520	0	0	0	0	6	0	Cytoplasmic vesicle membrane; Multi-pass
A6NL99	0	0	0	0	8	0	Membrane; Multi-pass membrane protein
O14520	0	0	0	0	6	0	Membrane; Multi-pass membrane protein.
O94778	0	0	2	0	6	0	Membrane; Multi-pass membrane protein.
O43315	0	0	0	0	6	0	Membrane; Multi-pass membrane protein.
B7XIC4	0	0	0	0	6	0	Cell membrane; Multi-pass membrane protein
O60306	0	0	0	0	0	0	Nucleus. Note=Localizes to speckle-like
Q5H913	0	0	0	0	0	0
Q3SXY8	0	0	0	0	0	0
Q6NSI1	0	0	0	0	0	0
A8MYR8	0	0	0	0	0	0
Q9Y2Y0	0	0	0	0	0	0	Cytoplasm. Mitochondrion intermembrane
Q15041	0	0	0	0	4	0	Endomembrane system; Multi-pass membrane
Q66PJ3	0	0	0	0	0	0
Q8N6S5	0	0	0	0	3	0	Membrane; Multi-pass membrane protein
Q8AAW1	0	0	0	0	0	0
A6L2R5	0	0	0	0	0	0
Q8G7J3	0	0	0	0	0	0
A1A7A9	0	0	0	0	0	0
Q5PDF2	0	0	0	0	0	0
A1A7B0	0	0	0	0	0	0
Q5PDF1	0	0	0	0	0	0
P10398	0	0	0	0	0	0
P83572	0	0	0	0	0	0
P83573	0	0	0	0	0	0
Q96P48	0	0	0	0	0	0	Cytoplasm. Golgi apparatus, Golgi stack
Q8WZ64	0	0	0	0	0	0	Cytoplasm (By similarity).
Q8WWN8	0	0	0	0	0	0	Cytoplasm (By similarity). Cytoplasm,
P25098	0	0	0	0	0	0
P35626	0	0	0	0	0	0
Q92747	0	0	0	0	0	0	Cytoplasm, cytoskeleton (Probable).
O15143	0	0	0	0	0	0	Cytoplasm, cytoskeleton.
P15879	1	0	0	0	0	0	Secreted.
A1AJF5	0	0	0	0	0	0	Cytoplasm (Potential).
P23793	0	0	0	0	0	0	Cytoplasm (Potential).
Q6AA78	0	0	0	0	0	0	Cytoplasm (By similarity).
Q4L9J9	0	0	0	0	0	0	Cytoplasm (Potential).
Q8DWQ2	0	0	0	0	0	0	Cytoplasm (By similarity).
C0MBK4	0	0	0	0	0	0	Cytoplasm (Potential).
Q1JAR2	0	0	0	0	0	0	Cytoplasm (Potential).
Q1JKW3	0	0	0	0	0	0	Cytoplasm (Potential).
Q1JFY9	0	0	0	0	0	0	Cytoplasm (Potential).
Q1J5Q4	0	0	0	0	0	0	Cytoplasm (Potential).
P58827	0	0	0	0	0	0	Cytoplasm (Potential).
P0C0B3	0	0	0	0	0	0	Cytoplasm (Potential).
C0MD79	0	0	0	0	0	0	Cytoplasm (Potential).
Q4L9V7	0	0	0	0	0	0	Cytoplasm (Potential).
Q8IWT0	0	0	0	0	0	0
Q505B7	0	0	0	0	0	0
Q4L9J7	0	0	0	0	0	0	Cytoplasm (By similarity).
D2Q9C6	0	0	0	0	0	0
Q8G3G6	0	0	0	0	0	0
Q4JVP5	0	0	0	0	0	0
Q7LC44	0	0	0	0	0	0	Cytoplasm, cytoskeleton (By similarity).
P15514	1	3	3	0	1	0	Membrane; Single-pass membrane protein.
P84077	0	0	0	0	0	0	Golgi apparatus. Cytoplasm, perinuclear
Q7KQL3	0	0	0	0	0	0	Golgi apparatus (By similarity).
Q94650	0	0	0	0	0	0	Golgi apparatus (By similarity).
P84079	0	0	0	0	0	0	Golgi apparatus. Cytoplasm, perinuclear
P61204	0	0	0	0	0	0	Golgi apparatus. Cytoplasm, perinuclear
P18085	0	0	0	0	0	0	Golgi apparatus.
P84085	0	0	0	0	0	0	Golgi apparatus. Cytoplasm, perinuclear
P62330	0	0	0	0	0	0	Golgi apparatus. Cell membrane; Lipid-
A5UJL1	0	0	0	0	0	0
Q2NF45	0	0	0	0	0	0
Q8N6T3	0	0	0	0	0	0	Cytoplasm (By similarity). Golgi apparatus
Q62848	0	0	0	0	0	0	Cytoplasm. Golgi apparatus. Note=Associates
Q8N6H7	0	0	0	0	0	0	Cytoplasm. Golgi apparatus membrane;
Q9NP61	0	0	0	0	0	0	Cytoplasm. Golgi apparatus membrane;
P53367	0	0	0	0	0	0
P53365	0	0	0	0	0	0
Q13795	0	0	0	0	0	0	Golgi apparatus.
P22274	0	0	0	0	0	0	Golgi apparatus.
P0CM17	0	0	0	0	0	0	Golgi apparatus.
P0CM16	0	0	0	0	0	0	Golgi apparatus.
A8MVX0	0	0	0	0	0	0
A5YM69	0	0	0	0	0	0
Q9HCE6	0	0	0	0	0	0	Cytoplasm.
Q8A2B0	0	0	0	0	0	0	Cytoplasm (By similarity).
A6L013	0	0	0	0	0	0	Cytoplasm (By similarity).
Q6G552	0	0	0	0	0	0	Cytoplasm (By similarity).
Q6G1F7	0	0	0	0	0	0	Cytoplasm (By similarity).
P59295	0	0	0	0	0	0	Cytoplasm (By similarity).
A7GXW0	0	0	0	0	0	0	Cytoplasm (By similarity).
A7I241	0	0	0	0	0	0	Cytoplasm (By similarity).
A7H1S5	0	0	0	0	0	0	Cytoplasm (By similarity).
Q188A2	0	0	0	0	0	0	Cytoplasm (By similarity).
Q4JW02	0	0	0	0	0	0	Cytoplasm (By similarity).
A1AID7	0	0	0	0	0	0	Cytoplasm (By similarity).
Q2GGM8	0	0	0	0	0	0	Cytoplasm (By similarity).
Q0BU70	0	0	0	0	0	0	Cytoplasm (By similarity).
A5UK52	0	0	0	0	0	0	Cytoplasm (By similarity).
Q2NGV4	0	0	0	0	0	0	Cytoplasm (By similarity).
A6L9A0	0	0	0	0	0	0	Cytoplasm (By similarity).
Q6A814	0	0	0	0	0	0	Cytoplasm (By similarity).
Q5PK74	0	0	0	0	0	0	Cytoplasm (By similarity).
Q8A1A7	0	0	0	0	0	0	Cytoplasm (Probable).
A6KXY5	0	0	0	0	0	0	Cytoplasm (Probable).
P59305	0	0	0	0	0	0	Cytoplasm (Probable).
A7H097	0	0	0	0	0	0	Cytoplasm (Probable).
A7I2W9	0	0	0	0	0	0	Cytoplasm (By similarity).
A7H1S3	0	0	0	0	0	0	Cytoplasm (Probable).
Q2GFI0	0	0	0	0	0	0	Cytoplasm (Probable).
C4Z4C2	0	0	0	0	0	0	Cytoplasm (By similarity).
A5ULI7	0	0	0	0	0	0	Cytoplasm (Probable).
Q2NGV2	0	0	0	0	0	0	Cytoplasm (Probable).
A6L849	0	0	0	0	0	0	Cytoplasm (Probable).
Q5PK75	0	0	0	0	0	0	Cytoplasm (Probable).
P59315	0	0	0	0	0	0	Cytoplasm (Probable).
Q5PK76	0	0	0	0	0	0	Cytoplasm (Probable).
A6NJG6	0	0	0	0	0	0	Nucleus (By similarity).
P05089	0	0	0	0	0	0	Cytoplasm.
P78540	0	0	0	0	0	0	Mitochondrion.
Q1E180	0	0	0	0	0	0
P40906	0	0	0	0	0	0
A6R040	0	0	0	0	0	0	Mitochondrion matrix (By similarity).
Q6G5T6	0	0	0	0	0	0	Cytoplasm (Probable).
Q6G0Q6	0	0	0	0	0	0	Cytoplasm (Probable).
Q8G5F0	0	0	0	0	0	0	Cytoplasm (Probable).
C5P7K2	0	0	0	0	0	0	Mitochondrion matrix (By similarity).
Q4JW03	0	0	0	0	0	0	Cytoplasm (Probable).
P0CM21	0	0	0	0	0	0	Mitochondrion matrix (By similarity).
P0CM20	0	0	0	0	0	0	Mitochondrion matrix (By similarity).
A8Q9M0	0	0	0	0	0	0	Mitochondrion matrix (By similarity).
C4JMY4	0	0	0	0	0	0	Mitochondrion matrix (By similarity).
Q9NWB6	0	0	0	0	0	0	Nucleus. Note=Recruited, in an estrogen-
Q5PJI9	0	0	0	0	6	0	Cell inner membrane; Multi-pass membrane
Q5GQ85	1	2	0	0	0	0	Secreted.
Q8A1A4	0	0	0	0	0	0	Cytoplasm (Probable).
A6KXY8	0	0	0	0	0	0	Cytoplasm (Probable).
Q8G5F1	0	0	0	0	0	0	Cytoplasm (Probable).
A1AGD0	0	0	0	0	0	0	Cytoplasm (Probable).
C4Z0G8	0	0	0	0	0	0	Cytoplasm (By similarity).
B9E6Q4	0	0	0	0	0	0	Cytoplasm (By similarity).
A6L852	0	0	0	0	0	0	Cytoplasm (Probable).
Q5PJU3	0	0	0	0	0	0	Cytoplasm (Probable).
Q4L6M1	0	0	0	0	0	0	Cytoplasm (Probable).
C0MGC7	0	0	0	0	0	0	Cytoplasm (By similarity).
A1IGU5	0	0	0	0	0	0
A1IGU4	0	0	0	0	0	0
A1IGU3	0	0	0	0	0	0
Q9NXL2	0	0	0	0	0	0
Q8TER5	0	0	0	0	0	0	Cytoplasm. Note=Concentrated in the
Q92888	0	0	0	0	0	0	Cytoplasm. Membrane. Note=Translocated to
Q92974	0	0	0	0	0	0	Cytoplasm. Cell junction, tight junction.
Q9NR81	0	0	0	0	0	0	Cytoplasm (By similarity).
Q9NR80	0	0	0	0	0	0	Isoform 3
Q12774	0	0	0	0	0	0
Q15052	0	0	0	0	0	0
Q14155	0	0	0	0	0	0	Cell junction, focal adhesion (By
Q7Z628	0	0	0	0	0	0	Cytoplasm (By similarity). Nucleus (By
O43307	0	0	0	0	0	0	Cytoplasm.
O15013	0	0	0	0	0	0
O15085	0	0	0	0	0	0	Cytoplasm. Membrane. Note=Translocated to
Q9NZN5	0	0	0	0	0	0	Cytoplasm (Probable). Membrane (Probable).
O94989	0	0	0	0	0	0	Cell projection, dendrite (By similarity).
Q5VV41	0	0	0	0	0	0	Cytoplasm (Probable).
Q96PE2	0	0	0	0	0	0
Q6ZSZ5	0	0	0	0	0	0	Cytoplasm. Note=Colocalizes with actin
Q8IW93	0	0	0	0	0	0
Q86VW2	0	0	0	0	0	0	Cell membrane (By similarity). Cytoplasm,
Q96DR7	0	0	0	0	0	0	Cell projection, ruffle.
[truncated: 43,230 more rows]
