# Supplementary material for: Genome-Scale Modeling of the Protein Secretory Machinery in Yeast
Source: PLoS One. 2013 May 7;8(5):e63284. doi: 10.1371/journal.pone.0063284 (PMC3646752; doi:10.1371/journal.pone.0063284)
Supplement: Table S9 — Genome-scale protein specific reaction list for 550 yeast potential secretory proteins. This table provide the entire reaction list for the highly potential yeast secretory machinery clients in protein specific manner. (XLSX) [file pone.0063284.s013.xlsx]

## Sheet: Sheet2
Table S9-Genome-scale protien specific reaction list for 550 yeast potential secretory protiens
Reactions	Subsystem	component
S000005235[Cytoplasm] + SRPC[Cytoplasm] => S000005235-SRPC[Cytoplasm]	translocation from cytosol to ER (SRP-dependent)	Srp14p;Srp21p;Srp54p;Sec65p;Srp68p;Srp72p
S000005235-SRPC[Cytoplasm] + SRC[Endoplasmic Reticulum] => S000005235-SRPC-SRC[Cytoplasm]	translocation from cytosol to ER (SRP-dependent)	Srp101p;Srp102p
S000005235-SRPC-SRC[Cytoplasm] + 2 GTP[Cytoplasm] + SEC61C[Endoplasmic Reticulum] => S000005235-SRPC-SRC-SEC61C[Cytoplasm]	translocation from cytosol to ER (SRP-dependent)	Sec61p;Sbh1p;Sss1p;Ssh1p
S000005235-SRPC-SRC-SEC61C[Cytoplasm] => S000005235-SEC61C[Cytoplasm] + Srp14p[Cytoplasm] + Srp21p[Cytoplasm] + Srp68p[Cytoplasm] + Sec65p[Cytoplasm] + Srp72p[Cytoplasm] + scR1[Cytoplasm] + Srp54p[Cytoplasm] + Srp51p[Cytoplasm] + Srp52p[Cytoplasm] + 2 GDP[Cytoplasm] + 2 pi[Cytoplasm]	translocation from cytosol to ER (SRP-dependent)
S000005235-SEC61C[Cytoplasm] + SPC[Endoplasmic Reticulum] => S000005235[Endoplasmic Reticulum] + Sec61p[Endoplasmic Reticulum] + Sbh1p[Endoplasmic Reticulum] + Sss1p[Endoplasmic Reticulum] + Sec11p[Endoplasmic Reticulum] + Spc1p[Endoplasmic Reticulum] + Spc2p[Endoplasmic Reticulum] + Spc3p[Endoplasmic Reticulum] + sp[Cytoplasm]	translocation from cytosol to ER (SRP-dependent)	Sec11p;Spc1p;Spc2p;Spc3p
S000005235-SEC61C[Endoplasmic Reticulum] + 13 Dol-pp-GlcNAc(2)man(9)-Glc(3)[Endoplasmic Reticulum] + OSTC[Endoplasmic Reticulum] => S000005235-G1-SEC61C[Endoplasmic Reticulum] + 13 Dol-ppEndoplasmic Reticulum] + Ost1p[Endoplasmic Reticulum] + Ost2p[Endoplasmic Reticulum] + St3p[Endoplasmic Reticulum] + Ost4p[Endoplasmic Reticulum] + Ost5p[Endoplasmic Reticulum] + Ost6p[Endoplasmic Reticulum] + St…	ER N-glycosylation	Stt3p;Ost1p;Wbp1p;OSt3p;Ost6p;Swp1p;Ost2p;Ost5p;Ost4p
S000005235-G1-SEC61C[Endoplasmic Reticulum] => S000005235-G1[Endoplasmic Reticulum] + SEC61C[Endoplasmic Reticulum]	protein folding
S000005235-G1[Endoplasmic Reticulum] => S000005235-G2[Endoplasmic Reticulum] + Glc[Endoplasmic Reticulum]	protein folding	Cwh41p
S000005235-G2[Endoplasmic Reticulum] => S000005235-G3[Endoplasmic Reticulum] + Glc[Endoplasmic Reticulum]	protein folding	Rot2p
S000005235-G3[Endoplasmic Reticulum] => S000005235-G4[Endoplasmic Reticulum] + Glc[Endoplasmic Reticulum]	protein folding	Rot2p
S000005235-G4[Endoplasmic Reticulum] => S000005235-G5[Endoplasmic Reticulum] + man[Endoplasmic Reticulum]	protein folding	Mns1p
S000005235-G5[Endoplasmic Reticulum] + 5 Kar2p[Endoplasmic Reticulum] + 5 ATP[Endoplasmic Reticulum] + 5 Scj1p[Endoplasmic Reticulum] + 5 Jem1p[Endoplasmic Reticulum] + 5 Sec63p[Endoplasmic Reticulum] => S000005235-G5-Kar2ATPcplx[Endoplasmic Reticulum]	protein folding	Kar2p;Scj1p;Jem1p;Sec63p
S000005235-G5-Kar2ATPcplx-[Endoplasmic Reticulum] => S000005235-F-G5-Kar2ADPcplx[Endoplasmic Reticulum] + 5 Scj1p[Endoplasmic Reticulum] + 5 Jem1p[Endoplasmic Reticulum] + 5 pi[Endoplasmic Reticulum] + Sec63p[Endoplasmic Reticulum]	protein folding
S000005235-F-G5-Kar2ADPcplx[Endoplasmic Reticulum] + 5 Sil1p[Endoplasmic Reticulum] + 5 Lhs1p[Endoplasmic Reticulum] + 5 ATP[Endoplasmic Reticulum] => S000005235-F-G5[Endoplasmic Reticulum] + 5 Sil1p[Endoplasmic Reticulum] + 5 Lhs1p[Endoplasmic Reticulum] + 5 ADP[Endoplasmic Reticulum] + 5 Kar2p[Endoplasmic Reticulum] protein folding	protein folding	Lhs1p;Sil1p
S000005235-F-G5[Endoplasmic Reticulum] + Sar1-GTP[Endoplasmic Reticulum] + Sec23-Sec24C[Cytoplasm] + Bet1p[Endoplasmic Reticulum] + Bos1p[Endoplasmic Reticulum] => S000005235-F-G5-COPII-pbud-cplx[Endoplasmic Reticulum]	COPII (for transmembrane cargo)	Sar1p;Sec23p;Sec24p;Bet1p;Bos1p
S000005235-F-G7orG5-COPII-pbud-cplx[Endoplasmic Reticulum] + Sec13-Sec31C[Cytoplasm] + Sec16p[Endoplasmic Reticulum] + Sed4p[Endoplasmic Reticulum] + Sec17p[Endoplasmic Reticulum] => S000005235-F-G5orG7-COPII[COPII]	COPII(common	Sec13p;Sec31p;Sec16p;Sed4p;Sec17p;Sec22p
S000005235-F-G5-COPII[COPII] + TRAPPIC[COPII] + Ypt1p[COPII] + GTP[COPII] => S000005235-F-G5[Golgi] + sar1-GDP[Cytoplasm] + pi[Cytoplasm] + Sec13-Sec31C[Cytoplasm] + Sec16p[Cytoplasm] + Sec12-Sed24C[Cytoplasm] + Bet3p[Cytoplasm] + Bet5p[Cytoplasm] + Trs20p[Cytoplasm] + Trs23p[Cytoplasm] + Trs31p[Cytoplasm] + Trs33p[Cytoplasm] + Bet1p[Endoplasmic Reticulum] + Bos1p[Endoplasmic Reticulum]	COPII (for transmembrane cargo)	Ypt1p;Uso1p;bug1p;Bet3p;Bet5p;Trs20p;Trs23p;Trs31p;Trs33p
S000005235-misf-G8-cplx[Endoplasmic Reticulum] + 0.1 Hrd1p[Endoplasmic Reticulum] => S000005235-misf-G8-HRDcplx[Endoplasmic Reticulum]	ERADM	Hrd1p
S000005235-misf-G8-HRDcplx[Endoplasmic Reticulum] + 0.1 Ubc7p[Cytoplasm] + 0.1 Cue1p[Cytoplasm] + 0.1 AAAC[Cytoplasm] => S000005235-misf-G8-UBcplx[Endoplasmic Reticulum] + 0.1 Hrd1p[Endoplasmic Reticulum] + 0.1 Usa1p[Endoplasmic Reticulum] + 0.1 Der1p[Endoplasmic Reticulum]	ERADM	Ubc7p; Cue1p;Usa1p; Der1p
S000005235-misf-G8-UBcplx[Endoplasmic Reticulum] + 5 ATP[Cytoplasm] + 5 Ubiquitin[Cytoplasm] => S000005235-misf-G8-Ubiquitin[Cytoplasm] + Ubc7p[Cytoplasm] + 0.1 Cue1p[Cytoplasm] + 0.1 Ubx2p[Endoplasmic Reticulum] + 0.1 Cdc48p[Cytoplasm] + 0.1 Ufd1p[Cytoplasm] + 0.1 Npl4p[Cytoplasm] + 0.1 Usa1p[Endoplasmic Reticulum] + 0.1 Der1p[Endoplasmic Reticulum] + 5 AMP[Cytoplasm] + 5 ppi[Cytoplasm]	ERADM	Ubx2p; Cdc48p; Ufd1p;Npl4p;Ubiquitin
S000005235-misf-G8-Ubiquitin[Cytoplasm] + 0.1 Dsk2p[Cytoplasm] + 0.1 Rad23p[Cytoplasm] + 0.1 Png1p[Cytoplasm] + 5 ATP[Cytoplasm] + 0.1 26sproteosome[Cytoplasm] + 5 H2O[Cytoplasm] => G8[Cytoplasm] + 5 Ubiquitin[Cytoplasm] + 5 ADP[Cytoplasm] + 5 pi[Cytoplasm] + S000005235aa[Cytoplasm]	ERADM	Png1p;26sproteosome
S000005235-G5orG7[Golgi] + GDP-man[Golgi] => S000005235-G9[Golgi] + GDP[Golgi]	Golgi processing	Och1p
S000005235-G9[Golgi] + 5 GDP-man[Golgi] => S000005235-G10[Golgi] + 5 GDP[Golgi]	Golgi processing	Mnn9p;Van1p
S000005235-G10[Golgi] + 40 GDP-man[Golgi] => S000005235-G11[Golgi] + 40 GDP[Golgi]	Golgi processing	Anp1p;Mnn9p;Mnn10p;Mnn11p;Hoc1p
S000005235-G15[Golgi] => S000005235-G16[Golgi] + aminoacid[Golgi]	Golgi processing	Kex1p;Kex2p;Ste13p
S000005235-M1[Golgi] + GTP[Cytoplasm] + clathrinC[Cytoplasm] + Arf1p[Cytoplasm] + EXOC[Cytoplasm] => S000005235-M1[cell membrane] + GDP[Golgi] + 2 Chc1p[Cytoplasm] + Clc1p[Cytoplasm] + Arf1p[Cytoplasm] + Sec3p[Cytoplasm] + Sec5p[Cytoplasm] + Sec6p[Cytoplasm] + Sec8p[Cytoplasm] + Sec10p[Cytoplasm] + Sec15p[Cytoplasm] + Exo70p[Cytoplasm] + Exo84p[Cytoplasm] + Sec4p[Cytoplasm]	LDSV(low density Secretory vesicle)	Arf1p;Sec3p;Sec5p;Sec6p;Sec8p;Sec10p;Sec15p;Exo70p;Exo84p;Sec4p;Chc1p;Clc1p
S000000619[Cytoplasm] + SRPC[Cytoplasm] => S000000619-SRPC[Cytoplasm]	translocation from cytosol to ER (SRP-dependent)	Srp14p;Srp21p;Srp54p;Sec65p;Srp68p;Srp72p
S000000619-SRPC[Cytoplasm] + SRC[Endoplasmic Reticulum] => S000000619-SRPC-SRC[Cytoplasm]	translocation from cytosol to ER (SRP-dependent)	Srp101p;Srp102p
S000000619-SRPC-SRC[Cytoplasm] + 2 GTP[Cytoplasm] + SEC61C[Endoplasmic Reticulum] => S000000619-SRPC-SRC-SEC61C[Cytoplasm]	translocation from cytosol to ER (SRP-dependent)	Sec61p;Sbh1p;Sss1p;Ssh1p
S000000619-SRPC-SRC-SEC61C[Cytoplasm] => S000000619-SEC61C[Cytoplasm] + Srp14p[Cytoplasm] + Srp21p[Cytoplasm] + Srp68p[Cytoplasm] + Sec65p[Cytoplasm] + Srp72p[Cytoplasm] + scR1[Cytoplasm] + Srp54p[Cytoplasm] + Srp51p[Cytoplasm] + Srp52p[Cytoplasm] + 2 GDP[Cytoplasm] + 2 pi[Cytoplasm]	translocation from cytosol to ER (SRP-dependent)
S000000619-SEC61C[Cytoplasm] + SPC[Endoplasmic Reticulum] => S000000619[Endoplasmic Reticulum] + Sec61p[Endoplasmic Reticulum] + Sbh1p[Endoplasmic Reticulum] + Sss1p[Endoplasmic Reticulum] + Sec11p[Endoplasmic Reticulum] + Spc1p[Endoplasmic Reticulum] + Spc2p[Endoplasmic Reticulum] + Spc3p[Endoplasmic Reticulum] + sp[Cytoplasm]	translocation from cytosol to ER (SRP-dependent)	Sec11p;Spc1p;Spc2p;Spc3p
S000000619-G1-SEC61C[Endoplasmic Reticulum] => S000000619-G1[Endoplasmic Reticulum] + SEC61C[Endoplasmic Reticulum]	protein folding
S000000619-G5[Endoplasmic Reticulum] + 5 Kar2p[Endoplasmic Reticulum] + 5 ATP[Endoplasmic Reticulum] + 5 Scj1p[Endoplasmic Reticulum] + 5 Jem1p[Endoplasmic Reticulum] + 5 Sec63p[Endoplasmic Reticulum] => S000000619-G5-Kar2ATPcplx[Endoplasmic Reticulum]	protein folding	Kar2p;Scj1p;Jem1p;Sec63p
S000000619-G5-Kar2ATPcplx-[Endoplasmic Reticulum] => S000000619-F-G5-Kar2ADPcplx[Endoplasmic Reticulum] + 5 Scj1p[Endoplasmic Reticulum] + 5 Jem1p[Endoplasmic Reticulum] + 5 pi[Endoplasmic Reticulum] + Sec63p[Endoplasmic Reticulum]	protein folding
S000000619-F-G5-Kar2ADPcplx[Endoplasmic Reticulum] + 5 Sil1p[Endoplasmic Reticulum] + 5 Lhs1p[Endoplasmic Reticulum] + 5 ATP[Endoplasmic Reticulum] => S000000619-F-G5[Endoplasmic Reticulum] + 5 Sil1p[Endoplasmic Reticulum] + 5 Lhs1p[Endoplasmic Reticulum] + 5 ADP[Endoplasmic Reticulum] + 5 Kar2p[Endoplasmic Reticulum] protein folding	protein folding	Lhs1p;Sil1p
S000000619-F-G5[Endoplasmic Reticulum] + Sar1-GTP[Endoplasmic Reticulum] + Sec23-Sec24C[Cytoplasm] + Bet1p[Endoplasmic Reticulum] + Bos1p[Endoplasmic Reticulum] => S000000619-F-G5-COPII-pbud-cplx[Endoplasmic Reticulum]	COPII (for transmembrane cargo)	Sar1p;Sec23p;Sec24p;Bet1p;Bos1p
S000000619-F-G7orG5-COPII-pbud-cplx[Endoplasmic Reticulum] + Sec13-Sec31C[Cytoplasm] + Sec16p[Endoplasmic Reticulum] + Sed4p[Endoplasmic Reticulum] + Sec17p[Endoplasmic Reticulum] => S000000619-F-G5orG7-COPII[COPII]	COPII(common	Sec13p;Sec31p;Sec16p;Sed4p;Sec17p;Sec22p
S000000619-F-G5-COPII[COPII] + TRAPPIC[COPII] + Ypt1p[COPII] + GTP[COPII] => S000000619-F-G5[Golgi] + sar1-GDP[Cytoplasm] + pi[Cytoplasm] + Sec13-Sec31C[Cytoplasm] + Sec16p[Cytoplasm] + Sec12-Sed24C[Cytoplasm] + Bet3p[Cytoplasm] + Bet5p[Cytoplasm] + Trs20p[Cytoplasm] + Trs23p[Cytoplasm] + Trs31p[Cytoplasm] + Trs33p[Cytoplasm] + Bet1p[Endoplasmic Reticulum] + Bos1p[Endoplasmic Reticulum]	COPII (for transmembrane cargo)	Ypt1p;Uso1p;bug1p;Bet3p;Bet5p;Trs20p;Trs23p;Trs31p;Trs33p
S000000619-misf-G8-cplx[Endoplasmic Reticulum] + 0.1 Hrd1p[Endoplasmic Reticulum] => S000000619-misf-G8-HRDcplx[Endoplasmic Reticulum]	ERADM	Hrd1p
S000000619-misf-G8-HRDcplx[Endoplasmic Reticulum] + 0.1 Ubc7p[Cytoplasm] + 0.1 Cue1p[Cytoplasm] + 0.1 AAAC[Cytoplasm] => S000000619-misf-G8-UBcplx[Endoplasmic Reticulum] + 0.1 Hrd1p[Endoplasmic Reticulum] + 0.1 Usa1p[Endoplasmic Reticulum] + 0.1 Der1p[Endoplasmic Reticulum]	ERADM	Ubc7p; Cue1p;Usa1p; Der1p
S000000619-misf-G8-UBcplx[Endoplasmic Reticulum] + 5 ATP[Cytoplasm] + 5 Ubiquitin[Cytoplasm] => S000000619-misf-G8-Ubiquitin[Cytoplasm] + Ubc7p[Cytoplasm] + 0.1 Cue1p[Cytoplasm] + 0.1 Ubx2p[Endoplasmic Reticulum] + 0.1 Cdc48p[Cytoplasm] + 0.1 Ufd1p[Cytoplasm] + 0.1 Npl4p[Cytoplasm] + 0.1 Usa1p[Endoplasmic Reticulum] + 0.1 Der1p[Endoplasmic Reticulum] + 5 AMP[Cytoplasm] + 5 ppi[Cytoplasm]	ERADM	Ubx2p; Cdc48p; Ufd1p;Npl4p;Ubiquitin
S000000619-misf-G8-Ubiquitin[Cytoplasm] + 0.1 Dsk2p[Cytoplasm] + 0.1 Rad23p[Cytoplasm] + 0.1 Png1p[Cytoplasm] + 5 ATP[Cytoplasm] + 0.1 26sproteosome[Cytoplasm] + 5 H2O[Cytoplasm] => G8[Cytoplasm] + 5 Ubiquitin[Cytoplasm] + 5 ADP[Cytoplasm] + 5 pi[Cytoplasm] + S000000619aa[Cytoplasm]	ERADM	Png1p;26sproteosome
S000000619-G15[Golgi] => S000000619-G16[Golgi] + aminoacid[Golgi]	Golgi processing	Kex1p;Kex2p;Ste13p
S000000619-M1[Golgi] + GTP[Cytoplasm] + clathrinC[Cytoplasm] + Arf1p[Cytoplasm] + EXOC[Cytoplasm] => S000000619-M1[cell membrane] + GDP[Golgi] + 2 Chc1p[Cytoplasm] + Clc1p[Cytoplasm] + Arf1p[Cytoplasm] + Sec3p[Cytoplasm] + Sec5p[Cytoplasm] + Sec6p[Cytoplasm] + Sec8p[Cytoplasm] + Sec10p[Cytoplasm] + Sec15p[Cytoplasm] + Exo70p[Cytoplasm] + Exo84p[Cytoplasm] + Sec4p[Cytoplasm]	LDSV(low density Secretory vesicle)	Arf1p;Sec3p;Sec5p;Sec6p;Sec8p;Sec10p;Sec15p;Exo70p;Exo84p;Sec4p;Chc1p;Clc1p
S000002103[Cytoplasm] + SRPC[Cytoplasm] => S000002103-SRPC[Cytoplasm]	translocation from cytosol to ER (SRP-dependent)	Srp14p;Srp21p;Srp54p;Sec65p;Srp68p;Srp72p
S000002103-SRPC[Cytoplasm] + SRC[Endoplasmic Reticulum] => S000002103-SRPC-SRC[Cytoplasm]	translocation from cytosol to ER (SRP-dependent)	Srp101p;Srp102p
S000002103-SRPC-SRC[Cytoplasm] + 2 GTP[Cytoplasm] + SEC61C[Endoplasmic Reticulum] => S000002103-SRPC-SRC-SEC61C[Cytoplasm]	translocation from cytosol to ER (SRP-dependent)	Sec61p;Sbh1p;Sss1p;Ssh1p
S000002103-SRPC-SRC-SEC61C[Cytoplasm] => S000002103-SEC61C[Cytoplasm] + Srp14p[Cytoplasm] + Srp21p[Cytoplasm] + Srp68p[Cytoplasm] + Sec65p[Cytoplasm] + Srp72p[Cytoplasm] + scR1[Cytoplasm] + Srp54p[Cytoplasm] + Srp51p[Cytoplasm] + Srp52p[Cytoplasm] + 2 GDP[Cytoplasm] + 2 pi[Cytoplasm]	translocation from cytosol to ER (SRP-dependent)
S000002103-SEC61C[Cytoplasm] + SPC[Endoplasmic Reticulum] => S000002103[Endoplasmic Reticulum] + Sec61p[Endoplasmic Reticulum] + Sbh1p[Endoplasmic Reticulum] + Sss1p[Endoplasmic Reticulum] + Sec11p[Endoplasmic Reticulum] + Spc1p[Endoplasmic Reticulum] + Spc2p[Endoplasmic Reticulum] + Spc3p[Endoplasmic Reticulum] + sp[Cytoplasm]	translocation from cytosol to ER (SRP-dependent)	Sec11p;Spc1p;Spc2p;Spc3p
S000002103-G1-SEC61C[Endoplasmic Reticulum] => S000002103-G1[Endoplasmic Reticulum] + SEC61C[Endoplasmic Reticulum]	protein folding
S000002103-G5[Endoplasmic Reticulum] + 5 Kar2p[Endoplasmic Reticulum] + 5 ATP[Endoplasmic Reticulum] + 5 Scj1p[Endoplasmic Reticulum] + 5 Jem1p[Endoplasmic Reticulum] + 5 Sec63p[Endoplasmic Reticulum] => S000002103-G5-Kar2ATPcplx[Endoplasmic Reticulum]	protein folding	Kar2p;Scj1p;Jem1p;Sec63p
S000002103-G5-Kar2ATPcplx-[Endoplasmic Reticulum] => S000002103-F-G5-Kar2ADPcplx[Endoplasmic Reticulum] + 5 Scj1p[Endoplasmic Reticulum] + 5 Jem1p[Endoplasmic Reticulum] + 5 pi[Endoplasmic Reticulum] + Sec63p[Endoplasmic Reticulum]	protein folding
S000002103-F-G5-Kar2ADPcplx[Endoplasmic Reticulum] + 5 Sil1p[Endoplasmic Reticulum] + 5 Lhs1p[Endoplasmic Reticulum] + 5 ATP[Endoplasmic Reticulum] => S000002103-F-G5[Endoplasmic Reticulum] + 5 Sil1p[Endoplasmic Reticulum] + 5 Lhs1p[Endoplasmic Reticulum] + 5 ADP[Endoplasmic Reticulum] + 5 Kar2p[Endoplasmic Reticulum] protein folding	protein folding	Lhs1p;Sil1p
S000002103-F-G5[Endoplasmic Reticulum] + Sar1-GTP[Endoplasmic Reticulum] + Sec23-Sec24C[Cytoplasm] + Bet1p[Endoplasmic Reticulum] + Bos1p[Endoplasmic Reticulum] => S000002103-F-G5-COPII-pbud-cplx[Endoplasmic Reticulum]	COPII (for transmembrane cargo)	Sar1p;Sec23p;Sec24p;Bet1p;Bos1p
S000002103-F-G7orG5-COPII-pbud-cplx[Endoplasmic Reticulum] + Sec13-Sec31C[Cytoplasm] + Sec16p[Endoplasmic Reticulum] + Sed4p[Endoplasmic Reticulum] + Sec17p[Endoplasmic Reticulum] => S000002103-F-G5orG7-COPII[COPII]	COPII(common	Sec13p;Sec31p;Sec16p;Sed4p;Sec17p;Sec22p
S000002103-F-G5-COPII[COPII] + TRAPPIC[COPII] + Ypt1p[COPII] + GTP[COPII] => S000002103-F-G5[Golgi] + sar1-GDP[Cytoplasm] + pi[Cytoplasm] + Sec13-Sec31C[Cytoplasm] + Sec16p[Cytoplasm] + Sec12-Sed24C[Cytoplasm] + Bet3p[Cytoplasm] + Bet5p[Cytoplasm] + Trs20p[Cytoplasm] + Trs23p[Cytoplasm] + Trs31p[Cytoplasm] + Trs33p[Cytoplasm] + Bet1p[Endoplasmic Reticulum] + Bos1p[Endoplasmic Reticulum]	COPII (for transmembrane cargo)	Ypt1p;Uso1p;bug1p;Bet3p;Bet5p;Trs20p;Trs23p;Trs31p;Trs33p
S000002103-misf-G8-cplx[Endoplasmic Reticulum] + 0.1 Hrd1p[Endoplasmic Reticulum] => S000002103-misf-G8-HRDcplx[Endoplasmic Reticulum]	ERADM	Hrd1p
S000002103-misf-G8-HRDcplx[Endoplasmic Reticulum] + 0.1 Ubc7p[Cytoplasm] + 0.1 Cue1p[Cytoplasm] + 0.1 AAAC[Cytoplasm] => S000002103-misf-G8-UBcplx[Endoplasmic Reticulum] + 0.1 Hrd1p[Endoplasmic Reticulum] + 0.1 Usa1p[Endoplasmic Reticulum] + 0.1 Der1p[Endoplasmic Reticulum]	ERADM	Ubc7p; Cue1p;Usa1p; Der1p
S000002103-misf-G8-UBcplx[Endoplasmic Reticulum] + 5 ATP[Cytoplasm] + 5 Ubiquitin[Cytoplasm] => S000002103-misf-G8-Ubiquitin[Cytoplasm] + Ubc7p[Cytoplasm] + 0.1 Cue1p[Cytoplasm] + 0.1 Ubx2p[Endoplasmic Reticulum] + 0.1 Cdc48p[Cytoplasm] + 0.1 Ufd1p[Cytoplasm] + 0.1 Npl4p[Cytoplasm] + 0.1 Usa1p[Endoplasmic Reticulum] + 0.1 Der1p[Endoplasmic Reticulum] + 5 AMP[Cytoplasm] + 5 ppi[Cytoplasm]	ERADM	Ubx2p; Cdc48p; Ufd1p;Npl4p;Ubiquitin
S000002103-misf-G8-Ubiquitin[Cytoplasm] + 0.1 Dsk2p[Cytoplasm] + 0.1 Rad23p[Cytoplasm] + 0.1 Png1p[Cytoplasm] + 5 ATP[Cytoplasm] + 0.1 26sproteosome[Cytoplasm] + 5 H2O[Cytoplasm] => G8[Cytoplasm] + 5 Ubiquitin[Cytoplasm] + 5 ADP[Cytoplasm] + 5 pi[Cytoplasm] + S000002103aa[Cytoplasm]	ERADM	Png1p;26sproteosome
S000002103-G15[Golgi] => S000002103-G16[Golgi] + aminoacid[Golgi]	Golgi processing	Kex1p;Kex2p;Ste13p
S000002103-M1[Golgi] + GTP[Cytoplasm] + clathrinC[Cytoplasm] + Arf1p[Cytoplasm] + EXOC[Cytoplasm] => S000002103-M1[cell membrane] + GDP[Golgi] + 2 Chc1p[Cytoplasm] + Clc1p[Cytoplasm] + Arf1p[Cytoplasm] + Sec3p[Cytoplasm] + Sec5p[Cytoplasm] + Sec6p[Cytoplasm] + Sec8p[Cytoplasm] + Sec10p[Cytoplasm] + Sec15p[Cytoplasm] + Exo70p[Cytoplasm] + Exo84p[Cytoplasm] + Sec4p[Cytoplasm]	LDSV(low density Secretory vesicle)	Arf1p;Sec3p;Sec5p;Sec6p;Sec8p;Sec10p;Sec15p;Exo70p;Exo84p;Sec4p;Chc1p;Clc1p
S000001168[Cytoplasm] + SRPC[Cytoplasm] => S000001168-SRPC[Cytoplasm]	translocation from cytosol to ER (SRP-dependent)	Srp14p;Srp21p;Srp54p;Sec65p;Srp68p;Srp72p
S000001168-SRPC[Cytoplasm] + SRC[Endoplasmic Reticulum] => S000001168-SRPC-SRC[Cytoplasm]	translocation from cytosol to ER (SRP-dependent)	Srp101p;Srp102p
S000001168-SRPC-SRC[Cytoplasm] + 2 GTP[Cytoplasm] + SEC61C[Endoplasmic Reticulum] => S000001168-SRPC-SRC-SEC61C[Cytoplasm]	translocation from cytosol to ER (SRP-dependent)	Sec61p;Sbh1p;Sss1p;Ssh1p
S000001168-SRPC-SRC-SEC61C[Cytoplasm] => S000001168-SEC61C[Cytoplasm] + Srp14p[Cytoplasm] + Srp21p[Cytoplasm] + Srp68p[Cytoplasm] + Sec65p[Cytoplasm] + Srp72p[Cytoplasm] + scR1[Cytoplasm] + Srp54p[Cytoplasm] + Srp51p[Cytoplasm] + Srp52p[Cytoplasm] + 2 GDP[Cytoplasm] + 2 pi[Cytoplasm]	translocation from cytosol to ER (SRP-dependent)
S000001168-SEC61C[Cytoplasm] + SPC[Endoplasmic Reticulum] => S000001168[Endoplasmic Reticulum] + Sec61p[Endoplasmic Reticulum] + Sbh1p[Endoplasmic Reticulum] + Sss1p[Endoplasmic Reticulum] + Sec11p[Endoplasmic Reticulum] + Spc1p[Endoplasmic Reticulum] + Spc2p[Endoplasmic Reticulum] + Spc3p[Endoplasmic Reticulum] + sp[Cytoplasm]	translocation from cytosol to ER (SRP-dependent)	Sec11p;Spc1p;Spc2p;Spc3p
S000001168-G5[Endoplasmic Reticulum] + 2 Acyl-PI-GlcN-(man)4-(EtNP)3[Endoplasmic Reticulum] => S000001168-G6[Endoplasmic Reticulum]	GPI biosynthesis	Gaa1p;Gpi8p;Gpi16p;Gpi17p;Gab1p
S000001168-G6[Endoplasmic Reticulum]=> S000001168-G6[Endoplasmic Reticulum] + ?acyl[Endoplasmic Reticulum]	GPI biosynthesis	Bst1p
S000001168-G1-SEC61C[Endoplasmic Reticulum] => S000001168-G1[Endoplasmic Reticulum] + SEC61C[Endoplasmic Reticulum]	protein folding
S000001168-G5[Endoplasmic Reticulum] + 5 Kar2p[Endoplasmic Reticulum] + 5 ATP[Endoplasmic Reticulum] + 5 Scj1p[Endoplasmic Reticulum] + 5 Jem1p[Endoplasmic Reticulum] + 5 Sec63p[Endoplasmic Reticulum] => S000001168-G5-Kar2ATPcplx[Endoplasmic Reticulum]	protein folding	Kar2p;Scj1p;Jem1p;Sec63p
S000001168-G5-Kar2ATPcplx-[Endoplasmic Reticulum] => S000001168-F-G5-Kar2ADPcplx[Endoplasmic Reticulum] + 5 Scj1p[Endoplasmic Reticulum] + 5 Jem1p[Endoplasmic Reticulum] + 5 pi[Endoplasmic Reticulum] + Sec63p[Endoplasmic Reticulum]	protein folding
S000001168-F-G5-Kar2ADPcplx[Endoplasmic Reticulum] + 5 Sil1p[Endoplasmic Reticulum] + 5 Lhs1p[Endoplasmic Reticulum] + 5 ATP[Endoplasmic Reticulum] => S000001168-F-G5[Endoplasmic Reticulum] + 5 Sil1p[Endoplasmic Reticulum] + 5 Lhs1p[Endoplasmic Reticulum] + 5 ADP[Endoplasmic Reticulum] + 5 Kar2p[Endoplasmic Reticulum] protein folding	protein folding	Lhs1p;Sil1p
S000001168-7-G5[Endoplasmic Reticulum] + Sar1-GTP[Endoplasmic Reticulum] + Sec23-Sec24C[Cytoplasm] + Emp24p[Endoplasmic Reticulum] + Bet1p[Endoplasmic Reticulum] + Bos1p[Endoplasmic Reticulum] => S000001168-F-G7-COPII-pbud-cplx[Endoplasmic Reticulum]	COPII(for GPI-anchored cargo)	Sar1p;Sec23p;Sec24p;Bet1p;Bos1p;Emp24p
S000001168-F-G7orG5-COPII-pbud-cplx[Endoplasmic Reticulum] + Sec13-Sec31C[Cytoplasm] + Sec16p[Endoplasmic Reticulum] + Sed4p[Endoplasmic Reticulum] + Sec17p[Endoplasmic Reticulum] => S000001168-F-G5orG7-COPII[COPII]	COPII(common	Sec13p;Sec31p;Sec16p;Sed4p;Sec17p;Sec22p
S000001168-F-G7-COPII[COPII] + TRAPPIC[COPII] + Ypt1p[COPII] + GTP[COPII] => S000001168-F-G7[Golgi] + sar1-GDP[Cytoplasm] + pi[Cytoplasm] + Sec13-Sec31C[Cytoplasm] + Sec16p[Cytoplasm] + Sec23p[COPII] + Sec24p[COPII] + Emp24p[Endoplasmic Reticulum] + Bet3p[Cytoplasm] + Bet5p[Cytoplasm] + Trs20p[Cytoplasm] + Trs23p[Cytoplasm] + Trs31p[Cytoplasm] + Trs33p[Cytoplasm] + Bet1p[Endoplasmic Reticulum] + …	COPII(for GPI-anchored cargo)	Ypt1p;Uso1p;bug1p;Bet3p;Bet5p;Trs20p;Trs23p;Trs31p;Trs33p
S000001168-misf-G6[Cytoplasm] + 0.1 Ssm4p[Endoplasmic Reticulum] + 0.1 SSH1C[Endoplasmic Reticulum] + 0.1 AAAC[Cytoplasm] => S000001168-misf-G6-UBcplx[Cytoplasm]	ERADC	Sbh1p;Sss1p;Ssh1p;Ubx2p;Cdc48p;Ufd1p;Npl4p;Ssm4p
S000001168-misf-G6-UBcplx[Endoplasmic Reticulum] + 5 ATP[Cytoplasm] + 5 Ubiquitin[Cytoplasm] => S000001168-misf-G6-Ubiquitin[Cytoplasm] + 5 ADP[Cytoplasm] + 0.1 Ssm4p[Endoplasmic Reticulum] + 0.1 Sbh1p[Endoplasmic Reticulum] + 0.1 Sss1p[Endoplasmic Reticulum] + 0.1 Ssh1p[Endoplasmic Reticulum] + 0.1 Ubx2p[Endoplasmic Reticulum] + 0.1 Cdc48p[Cytoplasm] + 0.1 Ufd1p[Cytoplasm] + 0.1 Npl4p[Cytoplasm]…	ERADC	Ubiquitin
S000001168-misf-G6-Ubiquitin[Cytoplasm] + 0.1 Png1p[Cytoplasm] + 5 ATP[Cytoplasm] + 0.1 26sproteosome[Cytoplasm] + 5 H2O[Cytoplasm] => G6[Cytoplasm] + 5 Ubiquitin[Cytoplasm] + 5 ADP[Cytoplasm] + 5 pi[Cytoplasm] + 0.1 S000001168aa[Cytoplasm]	ERADC	Png1p; 26sproteosome
S000001168-G15[Golgi] => S000001168-G16[Golgi] + aminoacid[Golgi]	Golgi processing	Kex1p;Kex2p;Ste13p
S000001168-M1[Golgi] + GTP[Cytoplasm] + clathrinC[Cytoplasm] + Arf1p[Cytoplasm] + EXOC[Cytoplasm] => S000001168-M1[cell membrane] + GDP[Golgi] + 2 Chc1p[Cytoplasm] + Clc1p[Cytoplasm] + Arf1p[Cytoplasm] + Sec3p[Cytoplasm] + Sec5p[Cytoplasm] + Sec6p[Cytoplasm] + Sec8p[Cytoplasm] + Sec10p[Cytoplasm] + Sec15p[Cytoplasm] + Exo70p[Cytoplasm] + Exo84p[Cytoplasm] + Sec4p[Cytoplasm]	LDSV(low density Secretory vesicle)	Arf1p;Sec3p;Sec5p;Sec6p;Sec8p;Sec10p;Sec15p;Exo70p;Exo84p;Sec4p;Chc1p;Clc1p
S000005492[Cytoplasm] + SRPC[Cytoplasm] => S000005492-SRPC[Cytoplasm]	translocation from cytosol to ER (SRP-dependent)	Srp14p;Srp21p;Srp54p;Sec65p;Srp68p;Srp72p
S000005492-SRPC[Cytoplasm] + SRC[Endoplasmic Reticulum] => S000005492-SRPC-SRC[Cytoplasm]	translocation from cytosol to ER (SRP-dependent)	Srp101p;Srp102p
S000005492-SRPC-SRC[Cytoplasm] + 2 GTP[Cytoplasm] + SEC61C[Endoplasmic Reticulum] => S000005492-SRPC-SRC-SEC61C[Cytoplasm]	translocation from cytosol to ER (SRP-dependent)	Sec61p;Sbh1p;Sss1p;Ssh1p
S000005492-SRPC-SRC-SEC61C[Cytoplasm] => S000005492-SEC61C[Cytoplasm] + Srp14p[Cytoplasm] + Srp21p[Cytoplasm] + Srp68p[Cytoplasm] + Sec65p[Cytoplasm] + Srp72p[Cytoplasm] + scR1[Cytoplasm] + Srp54p[Cytoplasm] + Srp51p[Cytoplasm] + Srp52p[Cytoplasm] + 2 GDP[Cytoplasm] + 2 pi[Cytoplasm]	translocation from cytosol to ER (SRP-dependent)
S000005492-SEC61C[Cytoplasm] + SPC[Endoplasmic Reticulum] => S000005492[Endoplasmic Reticulum] + Sec61p[Endoplasmic Reticulum] + Sbh1p[Endoplasmic Reticulum] + Sss1p[Endoplasmic Reticulum] + Sec11p[Endoplasmic Reticulum] + Spc1p[Endoplasmic Reticulum] + Spc2p[Endoplasmic Reticulum] + Spc3p[Endoplasmic Reticulum] + sp[Cytoplasm]	translocation from cytosol to ER (SRP-dependent)	Sec11p;Spc1p;Spc2p;Spc3p
S000005492-G5[Endoplasmic Reticulum] + 1 Acyl-PI-GlcN-(man)4-(EtNP)3[Endoplasmic Reticulum] => S000005492-G6[Endoplasmic Reticulum]	GPI biosynthesis	Gaa1p;Gpi8p;Gpi16p;Gpi17p;Gab1p
S000005492-G6[Endoplasmic Reticulum]=> S000005492-G6[Endoplasmic Reticulum] + ?acyl[Endoplasmic Reticulum]	GPI biosynthesis	Bst1p
S000005492-SEC61C[Endoplasmic Reticulum] + 2 Dol-pp-GlcNAc(2)man(9)-Glc(3)[Endoplasmic Reticulum] + OSTC[Endoplasmic Reticulum] => S000005492-G1-SEC61C[Endoplasmic Reticulum] + 2 Dol-ppEndoplasmic Reticulum] + Ost1p[Endoplasmic Reticulum] + Ost2p[Endoplasmic Reticulum] + St3p[Endoplasmic Reticulum] + Ost4p[Endoplasmic Reticulum] + Ost5p[Endoplasmic Reticulum] + Ost6p[Endoplasmic Reticulum] + Stt3…	ER N-glycosylation	Stt3p;Ost1p;Wbp1p;OSt3p;Ost6p;Swp1p;Ost2p;Ost5p;Ost4p
S000005492-G1-SEC61C[Endoplasmic Reticulum] => S000005492-G1[Endoplasmic Reticulum] + SEC61C[Endoplasmic Reticulum]	protein folding
S000005492-G1[Endoplasmic Reticulum] => S000005492-G2[Endoplasmic Reticulum] + Glc[Endoplasmic Reticulum]	protein folding	Cwh41p
S000005492-G2[Endoplasmic Reticulum] => S000005492-G3[Endoplasmic Reticulum] + Glc[Endoplasmic Reticulum]	protein folding	Rot2p
S000005492-G3[Endoplasmic Reticulum] => S000005492-G4[Endoplasmic Reticulum] + Glc[Endoplasmic Reticulum]	protein folding	Rot2p
S000005492-G4[Endoplasmic Reticulum] => S000005492-G5[Endoplasmic Reticulum] + man[Endoplasmic Reticulum]	protein folding	Mns1p
S000005492-G5[Endoplasmic Reticulum] + 5 Kar2p[Endoplasmic Reticulum] + 5 ATP[Endoplasmic Reticulum] + 5 Scj1p[Endoplasmic Reticulum] + 5 Jem1p[Endoplasmic Reticulum] + 5 Sec63p[Endoplasmic Reticulum] => S000005492-G5-Kar2ATPcplx[Endoplasmic Reticulum]	protein folding	Kar2p;Scj1p;Jem1p;Sec63p
S000005492-G5-Kar2ATPcplx-[Endoplasmic Reticulum] => S000005492-F-G5-Kar2ADPcplx[Endoplasmic Reticulum] + 5 Scj1p[Endoplasmic Reticulum] + 5 Jem1p[Endoplasmic Reticulum] + 5 pi[Endoplasmic Reticulum] + Sec63p[Endoplasmic Reticulum]	protein folding
S000005492-F-G5-Kar2ADPcplx[Endoplasmic Reticulum] + 5 Sil1p[Endoplasmic Reticulum] + 5 Lhs1p[Endoplasmic Reticulum] + 5 ATP[Endoplasmic Reticulum] => S000005492-F-G5[Endoplasmic Reticulum] + 5 Sil1p[Endoplasmic Reticulum] + 5 Lhs1p[Endoplasmic Reticulum] + 5 ADP[Endoplasmic Reticulum] + 5 Kar2p[Endoplasmic Reticulum] protein folding	protein folding	Lhs1p;Sil1p
S000005492-7-G5[Endoplasmic Reticulum] + Sar1-GTP[Endoplasmic Reticulum] + Sec23-Sec24C[Cytoplasm] + Emp24p[Endoplasmic Reticulum] + Bet1p[Endoplasmic Reticulum] + Bos1p[Endoplasmic Reticulum] => S000005492-F-G7-COPII-pbud-cplx[Endoplasmic Reticulum]	COPII(for GPI-anchored cargo)	Sar1p;Sec23p;Sec24p;Bet1p;Bos1p;Emp24p
S000005492-F-G7orG5-COPII-pbud-cplx[Endoplasmic Reticulum] + Sec13-Sec31C[Cytoplasm] + Sec16p[Endoplasmic Reticulum] + Sed4p[Endoplasmic Reticulum] + Sec17p[Endoplasmic Reticulum] => S000005492-F-G5orG7-COPII[COPII]	COPII(common	Sec13p;Sec31p;Sec16p;Sed4p;Sec17p;Sec22p
S000005492-F-G7-COPII[COPII] + TRAPPIC[COPII] + Ypt1p[COPII] + GTP[COPII] => S000005492-F-G7[Golgi] + sar1-GDP[Cytoplasm] + pi[Cytoplasm] + Sec13-Sec31C[Cytoplasm] + Sec16p[Cytoplasm] + Sec23p[COPII] + Sec24p[COPII] + Emp24p[Endoplasmic Reticulum] + Bet3p[Cytoplasm] + Bet5p[Cytoplasm] + Trs20p[Cytoplasm] + Trs23p[Cytoplasm] + Trs31p[Cytoplasm] + Trs33p[Cytoplasm] + Bet1p[Endoplasmic Reticulum] + …	COPII(for GPI-anchored cargo)	Ypt1p;Uso1p;bug1p;Bet3p;Bet5p;Trs20p;Trs23p;Trs31p;Trs33p
S000005492-misf-G6[Cytoplasm] + 0.1 Ssm4p[Endoplasmic Reticulum] + 0.1 SSH1C[Endoplasmic Reticulum] + 0.1 AAAC[Cytoplasm] => S000005492-misf-G6-UBcplx[Cytoplasm]	ERADC	Sbh1p;Sss1p;Ssh1p;Ubx2p;Cdc48p;Ufd1p;Npl4p;Ssm4p
S000005492-misf-G6-UBcplx[Endoplasmic Reticulum] + 5 ATP[Cytoplasm] + 5 Ubiquitin[Cytoplasm] => S000005492-misf-G6-Ubiquitin[Cytoplasm] + 5 ADP[Cytoplasm] + 0.1 Ssm4p[Endoplasmic Reticulum] + 0.1 Sbh1p[Endoplasmic Reticulum] + 0.1 Sss1p[Endoplasmic Reticulum] + 0.1 Ssh1p[Endoplasmic Reticulum] + 0.1 Ubx2p[Endoplasmic Reticulum] + 0.1 Cdc48p[Cytoplasm] + 0.1 Ufd1p[Cytoplasm] + 0.1 Npl4p[Cytoplasm]…	ERADC	Ubiquitin
S000005492-misf-G6-Ubiquitin[Cytoplasm] + 0.1 Png1p[Cytoplasm] + 5 ATP[Cytoplasm] + 0.1 26sproteosome[Cytoplasm] + 5 H2O[Cytoplasm] => G6[Cytoplasm] + 5 Ubiquitin[Cytoplasm] + 5 ADP[Cytoplasm] + 5 pi[Cytoplasm] + 0.1 S000005492aa[Cytoplasm]	ERADC	Png1p; 26sproteosome
S000005492-G5orG7[Golgi] + GDP-man[Golgi] => S000005492-G9[Golgi] + GDP[Golgi]	Golgi processing	Och1p
S000005492-G9[Golgi] + 5 GDP-man[Golgi] => S000005492-G10[Golgi] + 5 GDP[Golgi]	Golgi processing	Mnn9p;Van1p
S000005492-G10[Golgi] + 40 GDP-man[Golgi] => S000005492-G11[Golgi] + 40 GDP[Golgi]	Golgi processing	Anp1p;Mnn9p;Mnn10p;Mnn11p;Hoc1p
S000005492-G15[Golgi] => S000005492-G16[Golgi] + aminoacid[Golgi]	Golgi processing	Kex1p;Kex2p;Ste13p
S000005492-M1[Golgi] + GTP[Cytoplasm] + clathrinC[Cytoplasm] + Arf1p[Cytoplasm] + EXOC[Cytoplasm] => S000005492-M1[cell membrane] + GDP[Golgi] + 2 Chc1p[Cytoplasm] + Clc1p[Cytoplasm] + Arf1p[Cytoplasm] + Sec3p[Cytoplasm] + Sec5p[Cytoplasm] + Sec6p[Cytoplasm] + Sec8p[Cytoplasm] + Sec10p[Cytoplasm] + Sec15p[Cytoplasm] + Exo70p[Cytoplasm] + Exo84p[Cytoplasm] + Sec4p[Cytoplasm]	LDSV(low density Secretory vesicle)	Arf1p;Sec3p;Sec5p;Sec6p;Sec8p;Sec10p;Sec15p;Exo70p;Exo84p;Sec4p;Chc1p;Clc1p
S000005977[Cytoplasm] + SRPC[Cytoplasm] => S000005977-SRPC[Cytoplasm]	translocation from cytosol to ER (SRP-dependent)	Srp14p;Srp21p;Srp54p;Sec65p;Srp68p;Srp72p
S000005977-SRPC[Cytoplasm] + SRC[Endoplasmic Reticulum] => S000005977-SRPC-SRC[Cytoplasm]	translocation from cytosol to ER (SRP-dependent)	Srp101p;Srp102p
S000005977-SRPC-SRC[Cytoplasm] + 2 GTP[Cytoplasm] + SEC61C[Endoplasmic Reticulum] => S000005977-SRPC-SRC-SEC61C[Cytoplasm]	translocation from cytosol to ER (SRP-dependent)	Sec61p;Sbh1p;Sss1p;Ssh1p
S000005977-SRPC-SRC-SEC61C[Cytoplasm] => S000005977-SEC61C[Cytoplasm] + Srp14p[Cytoplasm] + Srp21p[Cytoplasm] + Srp68p[Cytoplasm] + Sec65p[Cytoplasm] + Srp72p[Cytoplasm] + scR1[Cytoplasm] + Srp54p[Cytoplasm] + Srp51p[Cytoplasm] + Srp52p[Cytoplasm] + 2 GDP[Cytoplasm] + 2 pi[Cytoplasm]	translocation from cytosol to ER (SRP-dependent)
S000005977-SEC61C[Cytoplasm] + SPC[Endoplasmic Reticulum] => S000005977[Endoplasmic Reticulum] + Sec61p[Endoplasmic Reticulum] + Sbh1p[Endoplasmic Reticulum] + Sss1p[Endoplasmic Reticulum] + Sec11p[Endoplasmic Reticulum] + Spc1p[Endoplasmic Reticulum] + Spc2p[Endoplasmic Reticulum] + Spc3p[Endoplasmic Reticulum] + sp[Cytoplasm]	translocation from cytosol to ER (SRP-dependent)	Sec11p;Spc1p;Spc2p;Spc3p
S000005977-G5[Endoplasmic Reticulum] + 1 Acyl-PI-GlcN-(man)4-(EtNP)3[Endoplasmic Reticulum] => S000005977-G6[Endoplasmic Reticulum]	GPI biosynthesis	Gaa1p;Gpi8p;Gpi16p;Gpi17p;Gab1p
S000005977-G6[Endoplasmic Reticulum]=> S000005977-G6[Endoplasmic Reticulum] + ?acyl[Endoplasmic Reticulum]	GPI biosynthesis	Bst1p
S000005977-G1-SEC61C[Endoplasmic Reticulum] => S000005977-G1[Endoplasmic Reticulum] + SEC61C[Endoplasmic Reticulum]	protein folding
S000005977-G5[Endoplasmic Reticulum] + 5 Kar2p[Endoplasmic Reticulum] + 5 ATP[Endoplasmic Reticulum] + 5 Scj1p[Endoplasmic Reticulum] + 5 Jem1p[Endoplasmic Reticulum] + 5 Sec63p[Endoplasmic Reticulum] => S000005977-G5-Kar2ATPcplx[Endoplasmic Reticulum]	protein folding	Kar2p;Scj1p;Jem1p;Sec63p
S000005977-G5-Kar2ATPcplx-[Endoplasmic Reticulum] => S000005977-F-G5-Kar2ADPcplx[Endoplasmic Reticulum] + 5 Scj1p[Endoplasmic Reticulum] + 5 Jem1p[Endoplasmic Reticulum] + 5 pi[Endoplasmic Reticulum] + Sec63p[Endoplasmic Reticulum]	protein folding
S000005977-F-G5-Kar2ADPcplx[Endoplasmic Reticulum] + 5 Sil1p[Endoplasmic Reticulum] + 5 Lhs1p[Endoplasmic Reticulum] + 5 ATP[Endoplasmic Reticulum] => S000005977-F-G5[Endoplasmic Reticulum] + 5 Sil1p[Endoplasmic Reticulum] + 5 Lhs1p[Endoplasmic Reticulum] + 5 ADP[Endoplasmic Reticulum] + 5 Kar2p[Endoplasmic Reticulum] protein folding	protein folding	Lhs1p;Sil1p
S000005977-7-G5[Endoplasmic Reticulum] + Sar1-GTP[Endoplasmic Reticulum] + Sec23-Sec24C[Cytoplasm] + Emp24p[Endoplasmic Reticulum] + Bet1p[Endoplasmic Reticulum] + Bos1p[Endoplasmic Reticulum] => S000005977-F-G7-COPII-pbud-cplx[Endoplasmic Reticulum]	COPII(for GPI-anchored cargo)	Sar1p;Sec23p;Sec24p;Bet1p;Bos1p;Emp24p
S000005977-F-G7orG5-COPII-pbud-cplx[Endoplasmic Reticulum] + Sec13-Sec31C[Cytoplasm] + Sec16p[Endoplasmic Reticulum] + Sed4p[Endoplasmic Reticulum] + Sec17p[Endoplasmic Reticulum] => S000005977-F-G5orG7-COPII[COPII]	COPII(common	Sec13p;Sec31p;Sec16p;Sed4p;Sec17p;Sec22p
S000005977-F-G7-COPII[COPII] + TRAPPIC[COPII] + Ypt1p[COPII] + GTP[COPII] => S000005977-F-G7[Golgi] + sar1-GDP[Cytoplasm] + pi[Cytoplasm] + Sec13-Sec31C[Cytoplasm] + Sec16p[Cytoplasm] + Sec23p[COPII] + Sec24p[COPII] + Emp24p[Endoplasmic Reticulum] + Bet3p[Cytoplasm] + Bet5p[Cytoplasm] + Trs20p[Cytoplasm] + Trs23p[Cytoplasm] + Trs31p[Cytoplasm] + Trs33p[Cytoplasm] + Bet1p[Endoplasmic Reticulum] + …	COPII(for GPI-anchored cargo)	Ypt1p;Uso1p;bug1p;Bet3p;Bet5p;Trs20p;Trs23p;Trs31p;Trs33p
S000005977-misf-G6[Cytoplasm] + 0.1 Ssm4p[Endoplasmic Reticulum] + 0.1 SSH1C[Endoplasmic Reticulum] + 0.1 AAAC[Cytoplasm] => S000005977-misf-G6-UBcplx[Cytoplasm]	ERADC	Sbh1p;Sss1p;Ssh1p;Ubx2p;Cdc48p;Ufd1p;Npl4p;Ssm4p
S000005977-misf-G6-UBcplx[Endoplasmic Reticulum] + 5 ATP[Cytoplasm] + 5 Ubiquitin[Cytoplasm] => S000005977-misf-G6-Ubiquitin[Cytoplasm] + 5 ADP[Cytoplasm] + 0.1 Ssm4p[Endoplasmic Reticulum] + 0.1 Sbh1p[Endoplasmic Reticulum] + 0.1 Sss1p[Endoplasmic Reticulum] + 0.1 Ssh1p[Endoplasmic Reticulum] + 0.1 Ubx2p[Endoplasmic Reticulum] + 0.1 Cdc48p[Cytoplasm] + 0.1 Ufd1p[Cytoplasm] + 0.1 Npl4p[Cytoplasm]…	ERADC	Ubiquitin
S000005977-misf-G6-Ubiquitin[Cytoplasm] + 0.1 Png1p[Cytoplasm] + 5 ATP[Cytoplasm] + 0.1 26sproteosome[Cytoplasm] + 5 H2O[Cytoplasm] => G6[Cytoplasm] + 5 Ubiquitin[Cytoplasm] + 5 ADP[Cytoplasm] + 5 pi[Cytoplasm] + 0.1 S000005977aa[Cytoplasm]	ERADC	Png1p; 26sproteosome
S000005977-G15[Golgi] => S000005977-G16[Golgi] + aminoacid[Golgi]	Golgi processing	Kex1p;Kex2p;Ste13p
S000005977-M1[Golgi] + GTP[Cytoplasm] + clathrinC[Cytoplasm] + Arf1p[Cytoplasm] + EXOC[Cytoplasm] => S000005977-M1[cell membrane] + GDP[Golgi] + 2 Chc1p[Cytoplasm] + Clc1p[Cytoplasm] + Arf1p[Cytoplasm] + Sec3p[Cytoplasm] + Sec5p[Cytoplasm] + Sec6p[Cytoplasm] + Sec8p[Cytoplasm] + Sec10p[Cytoplasm] + Sec15p[Cytoplasm] + Exo70p[Cytoplasm] + Exo84p[Cytoplasm] + Sec4p[Cytoplasm]	LDSV(low density Secretory vesicle)	Arf1p;Sec3p;Sec5p;Sec6p;Sec8p;Sec10p;Sec15p;Exo70p;Exo84p;Sec4p;Chc1p;Clc1p
S000004610[Cytoplasm] + SRPC[Cytoplasm] => S000004610-SRPC[Cytoplasm]	translocation from cytosol to ER (SRP-dependent)	Srp14p;Srp21p;Srp54p;Sec65p;Srp68p;Srp72p
S000004610-SRPC[Cytoplasm] + SRC[Endoplasmic Reticulum] => S000004610-SRPC-SRC[Cytoplasm]	translocation from cytosol to ER (SRP-dependent)	Srp101p;Srp102p
S000004610-SRPC-SRC[Cytoplasm] + 2 GTP[Cytoplasm] + SEC61C[Endoplasmic Reticulum] => S000004610-SRPC-SRC-SEC61C[Cytoplasm]	translocation from cytosol to ER (SRP-dependent)	Sec61p;Sbh1p;Sss1p;Ssh1p
S000004610-SRPC-SRC-SEC61C[Cytoplasm] => S000004610-SEC61C[Cytoplasm] + Srp14p[Cytoplasm] + Srp21p[Cytoplasm] + Srp68p[Cytoplasm] + Sec65p[Cytoplasm] + Srp72p[Cytoplasm] + scR1[Cytoplasm] + Srp54p[Cytoplasm] + Srp51p[Cytoplasm] + Srp52p[Cytoplasm] + 2 GDP[Cytoplasm] + 2 pi[Cytoplasm]	translocation from cytosol to ER (SRP-dependent)
S000004610-SEC61C[Cytoplasm] + SPC[Endoplasmic Reticulum] => S000004610[Endoplasmic Reticulum] + Sec61p[Endoplasmic Reticulum] + Sbh1p[Endoplasmic Reticulum] + Sss1p[Endoplasmic Reticulum] + Sec11p[Endoplasmic Reticulum] + Spc1p[Endoplasmic Reticulum] + Spc2p[Endoplasmic Reticulum] + Spc3p[Endoplasmic Reticulum] + sp[Cytoplasm]	translocation from cytosol to ER (SRP-dependent)	Sec11p;Spc1p;Spc2p;Spc3p
S000004610-G5[Endoplasmic Reticulum] + 1 Acyl-PI-GlcN-(man)4-(EtNP)3[Endoplasmic Reticulum] => S000004610-G6[Endoplasmic Reticulum]	GPI biosynthesis	Gaa1p;Gpi8p;Gpi16p;Gpi17p;Gab1p
S000004610-G6[Endoplasmic Reticulum]=> S000004610-G6[Endoplasmic Reticulum] + ?acyl[Endoplasmic Reticulum]	GPI biosynthesis	Bst1p
S000004610-SEC61C[Endoplasmic Reticulum] + 19 Dol-pp-GlcNAc(2)man(9)-Glc(3)[Endoplasmic Reticulum] + OSTC[Endoplasmic Reticulum] => S000004610-G1-SEC61C[Endoplasmic Reticulum] + 19 Dol-ppEndoplasmic Reticulum] + Ost1p[Endoplasmic Reticulum] + Ost2p[Endoplasmic Reticulum] + St3p[Endoplasmic Reticulum] + Ost4p[Endoplasmic Reticulum] + Ost5p[Endoplasmic Reticulum] + Ost6p[Endoplasmic Reticulum] + St…	ER N-glycosylation	Stt3p;Ost1p;Wbp1p;OSt3p;Ost6p;Swp1p;Ost2p;Ost5p;Ost4p
S000004610-G1-SEC61C[Endoplasmic Reticulum] => S000004610-G1[Endoplasmic Reticulum] + SEC61C[Endoplasmic Reticulum]	protein folding
S000004610-G1[Endoplasmic Reticulum] => S000004610-G2[Endoplasmic Reticulum] + Glc[Endoplasmic Reticulum]	protein folding	Cwh41p
S000004610-G2[Endoplasmic Reticulum] => S000004610-G3[Endoplasmic Reticulum] + Glc[Endoplasmic Reticulum]	protein folding	Rot2p
S000004610-G3[Endoplasmic Reticulum] => S000004610-G4[Endoplasmic Reticulum] + Glc[Endoplasmic Reticulum]	protein folding	Rot2p
S000004610-G4[Endoplasmic Reticulum] => S000004610-G5[Endoplasmic Reticulum] + man[Endoplasmic Reticulum]	protein folding	Mns1p
S000004610-G5[Endoplasmic Reticulum] + 5 Kar2p[Endoplasmic Reticulum] + 5 ATP[Endoplasmic Reticulum] + 5 Scj1p[Endoplasmic Reticulum] + 5 Jem1p[Endoplasmic Reticulum] + 5 Sec63p[Endoplasmic Reticulum] => S000004610-G5-Kar2ATPcplx[Endoplasmic Reticulum]	protein folding	Kar2p;Scj1p;Jem1p;Sec63p
S000004610-G5-Kar2ATPcplx-[Endoplasmic Reticulum] => S000004610-F-G5-Kar2ADPcplx[Endoplasmic Reticulum] + 5 Scj1p[Endoplasmic Reticulum] + 5 Jem1p[Endoplasmic Reticulum] + 5 pi[Endoplasmic Reticulum] + Sec63p[Endoplasmic Reticulum]	protein folding
S000004610-F-G5-Kar2ADPcplx[Endoplasmic Reticulum] + 5 Sil1p[Endoplasmic Reticulum] + 5 Lhs1p[Endoplasmic Reticulum] + 5 ATP[Endoplasmic Reticulum] => S000004610-F-G5[Endoplasmic Reticulum] + 5 Sil1p[Endoplasmic Reticulum] + 5 Lhs1p[Endoplasmic Reticulum] + 5 ADP[Endoplasmic Reticulum] + 5 Kar2p[Endoplasmic Reticulum] protein folding	protein folding	Lhs1p;Sil1p
S000004610-7-G5[Endoplasmic Reticulum] + Sar1-GTP[Endoplasmic Reticulum] + Sec23-Sec24C[Cytoplasm] + Emp24p[Endoplasmic Reticulum] + Bet1p[Endoplasmic Reticulum] + Bos1p[Endoplasmic Reticulum] => S000004610-F-G7-COPII-pbud-cplx[Endoplasmic Reticulum]	COPII(for GPI-anchored cargo)	Sar1p;Sec23p;Sec24p;Bet1p;Bos1p;Emp24p
S000004610-F-G7orG5-COPII-pbud-cplx[Endoplasmic Reticulum] + Sec13-Sec31C[Cytoplasm] + Sec16p[Endoplasmic Reticulum] + Sed4p[Endoplasmic Reticulum] + Sec17p[Endoplasmic Reticulum] => S000004610-F-G5orG7-COPII[COPII]	COPII(common	Sec13p;Sec31p;Sec16p;Sed4p;Sec17p;Sec22p
S000004610-F-G7-COPII[COPII] + TRAPPIC[COPII] + Ypt1p[COPII] + GTP[COPII] => S000004610-F-G7[Golgi] + sar1-GDP[Cytoplasm] + pi[Cytoplasm] + Sec13-Sec31C[Cytoplasm] + Sec16p[Cytoplasm] + Sec23p[COPII] + Sec24p[COPII] + Emp24p[Endoplasmic Reticulum] + Bet3p[Cytoplasm] + Bet5p[Cytoplasm] + Trs20p[Cytoplasm] + Trs23p[Cytoplasm] + Trs31p[Cytoplasm] + Trs33p[Cytoplasm] + Bet1p[Endoplasmic Reticulum] + …	COPII(for GPI-anchored cargo)	Ypt1p;Uso1p;bug1p;Bet3p;Bet5p;Trs20p;Trs23p;Trs31p;Trs33p
S000004610-misf-G6[Cytoplasm] + 0.1 Ssm4p[Endoplasmic Reticulum] + 0.1 SSH1C[Endoplasmic Reticulum] + 0.1 AAAC[Cytoplasm] => S000004610-misf-G6-UBcplx[Cytoplasm]	ERADC	Sbh1p;Sss1p;Ssh1p;Ubx2p;Cdc48p;Ufd1p;Npl4p;Ssm4p
S000004610-misf-G6-UBcplx[Endoplasmic Reticulum] + 5 ATP[Cytoplasm] + 5 Ubiquitin[Cytoplasm] => S000004610-misf-G6-Ubiquitin[Cytoplasm] + 5 ADP[Cytoplasm] + 0.1 Ssm4p[Endoplasmic Reticulum] + 0.1 Sbh1p[Endoplasmic Reticulum] + 0.1 Sss1p[Endoplasmic Reticulum] + 0.1 Ssh1p[Endoplasmic Reticulum] + 0.1 Ubx2p[Endoplasmic Reticulum] + 0.1 Cdc48p[Cytoplasm] + 0.1 Ufd1p[Cytoplasm] + 0.1 Npl4p[Cytoplasm]…	ERADC	Ubiquitin
S000004610-misf-G6-Ubiquitin[Cytoplasm] + 0.1 Png1p[Cytoplasm] + 5 ATP[Cytoplasm] + 0.1 26sproteosome[Cytoplasm] + 5 H2O[Cytoplasm] => G6[Cytoplasm] + 5 Ubiquitin[Cytoplasm] + 5 ADP[Cytoplasm] + 5 pi[Cytoplasm] + 0.1 S000004610aa[Cytoplasm]	ERADC	Png1p; 26sproteosome
S000004610-G5orG7[Golgi] + GDP-man[Golgi] => S000004610-G9[Golgi] + GDP[Golgi]	Golgi processing	Och1p
S000004610-G9[Golgi] + 5 GDP-man[Golgi] => S000004610-G10[Golgi] + 5 GDP[Golgi]	Golgi processing	Mnn9p;Van1p
S000004610-G10[Golgi] + 40 GDP-man[Golgi] => S000004610-G11[Golgi] + 40 GDP[Golgi]	Golgi processing	Anp1p;Mnn9p;Mnn10p;Mnn11p;Hoc1p
S000004610-G15[Golgi] => S000004610-G16[Golgi] + aminoacid[Golgi]	Golgi processing	Kex1p;Kex2p;Ste13p
S000004610-M1[Golgi] + GTP[Cytoplasm] + clathrinC[Cytoplasm] + Arf1p[Cytoplasm] + EXOC[Cytoplasm] => S000004610-M1[cell membrane] + GDP[Golgi] + 2 Chc1p[Cytoplasm] + Clc1p[Cytoplasm] + Arf1p[Cytoplasm] + Sec3p[Cytoplasm] + Sec5p[Cytoplasm] + Sec6p[Cytoplasm] + Sec8p[Cytoplasm] + Sec10p[Cytoplasm] + Sec15p[Cytoplasm] + Exo70p[Cytoplasm] + Exo84p[Cytoplasm] + Sec4p[Cytoplasm]	LDSV(low density Secretory vesicle)	Arf1p;Sec3p;Sec5p;Sec6p;Sec8p;Sec10p;Sec15p;Exo70p;Exo84p;Sec4p;Chc1p;Clc1p
S000005371[Cytoplasm] + SRPC[Cytoplasm] => S000005371-SRPC[Cytoplasm]	translocation from cytosol to ER (SRP-dependent)	Srp14p;Srp21p;Srp54p;Sec65p;Srp68p;Srp72p
S000005371-SRPC[Cytoplasm] + SRC[Endoplasmic Reticulum] => S000005371-SRPC-SRC[Cytoplasm]	translocation from cytosol to ER (SRP-dependent)	Srp101p;Srp102p
S000005371-SRPC-SRC[Cytoplasm] + 2 GTP[Cytoplasm] + SEC61C[Endoplasmic Reticulum] => S000005371-SRPC-SRC-SEC61C[Cytoplasm]	translocation from cytosol to ER (SRP-dependent)	Sec61p;Sbh1p;Sss1p;Ssh1p
S000005371-SRPC-SRC-SEC61C[Cytoplasm] => S000005371-SEC61C[Cytoplasm] + Srp14p[Cytoplasm] + Srp21p[Cytoplasm] + Srp68p[Cytoplasm] + Sec65p[Cytoplasm] + Srp72p[Cytoplasm] + scR1[Cytoplasm] + Srp54p[Cytoplasm] + Srp51p[Cytoplasm] + Srp52p[Cytoplasm] + 2 GDP[Cytoplasm] + 2 pi[Cytoplasm]	translocation from cytosol to ER (SRP-dependent)
S000005371-SEC61C[Cytoplasm] + SPC[Endoplasmic Reticulum] => S000005371[Endoplasmic Reticulum] + Sec61p[Endoplasmic Reticulum] + Sbh1p[Endoplasmic Reticulum] + Sss1p[Endoplasmic Reticulum] + Sec11p[Endoplasmic Reticulum] + Spc1p[Endoplasmic Reticulum] + Spc2p[Endoplasmic Reticulum] + Spc3p[Endoplasmic Reticulum] + sp[Cytoplasm]	translocation from cytosol to ER (SRP-dependent)	Sec11p;Spc1p;Spc2p;Spc3p
S000005371-G5[Endoplasmic Reticulum] + 1 Acyl-PI-GlcN-(man)4-(EtNP)3[Endoplasmic Reticulum] => S000005371-G6[Endoplasmic Reticulum]	GPI biosynthesis	Gaa1p;Gpi8p;Gpi16p;Gpi17p;Gab1p
S000005371-G6[Endoplasmic Reticulum]=> S000005371-G6[Endoplasmic Reticulum] + ?acyl[Endoplasmic Reticulum]	GPI biosynthesis	Bst1p
S000005371-SEC61C[Endoplasmic Reticulum] + 14 Dol-pp-GlcNAc(2)man(9)-Glc(3)[Endoplasmic Reticulum] + OSTC[Endoplasmic Reticulum] => S000005371-G1-SEC61C[Endoplasmic Reticulum] + 14 Dol-ppEndoplasmic Reticulum] + Ost1p[Endoplasmic Reticulum] + Ost2p[Endoplasmic Reticulum] + St3p[Endoplasmic Reticulum] + Ost4p[Endoplasmic Reticulum] + Ost5p[Endoplasmic Reticulum] + Ost6p[Endoplasmic Reticulum] + St…	ER N-glycosylation	Stt3p;Ost1p;Wbp1p;OSt3p;Ost6p;Swp1p;Ost2p;Ost5p;Ost4p
S000005371-G1-SEC61C[Endoplasmic Reticulum] => S000005371-G1[Endoplasmic Reticulum] + SEC61C[Endoplasmic Reticulum]	protein folding
S000005371-G1[Endoplasmic Reticulum] => S000005371-G2[Endoplasmic Reticulum] + Glc[Endoplasmic Reticulum]	protein folding	Cwh41p
S000005371-G2[Endoplasmic Reticulum] => S000005371-G3[Endoplasmic Reticulum] + Glc[Endoplasmic Reticulum]	protein folding	Rot2p
S000005371-G3[Endoplasmic Reticulum] => S000005371-G4[Endoplasmic Reticulum] + Glc[Endoplasmic Reticulum]	protein folding	Rot2p
S000005371-G4[Endoplasmic Reticulum] => S000005371-G5[Endoplasmic Reticulum] + man[Endoplasmic Reticulum]	protein folding	Mns1p
S000005371-G5[Endoplasmic Reticulum] + 5 Kar2p[Endoplasmic Reticulum] + 5 ATP[Endoplasmic Reticulum] + 5 Scj1p[Endoplasmic Reticulum] + 5 Jem1p[Endoplasmic Reticulum] + 5 Sec63p[Endoplasmic Reticulum] => S000005371-G5-Kar2ATPcplx[Endoplasmic Reticulum]	protein folding	Kar2p;Scj1p;Jem1p;Sec63p
S000005371-G5-Kar2ATPcplx-[Endoplasmic Reticulum] => S000005371-F-G5-Kar2ADPcplx[Endoplasmic Reticulum] + 5 Scj1p[Endoplasmic Reticulum] + 5 Jem1p[Endoplasmic Reticulum] + 5 pi[Endoplasmic Reticulum] + Sec63p[Endoplasmic Reticulum]	protein folding
S000005371-F-G5-Kar2ADPcplx[Endoplasmic Reticulum] + 5 Sil1p[Endoplasmic Reticulum] + 5 Lhs1p[Endoplasmic Reticulum] + 5 ATP[Endoplasmic Reticulum] => S000005371-F-G5[Endoplasmic Reticulum] + 5 Sil1p[Endoplasmic Reticulum] + 5 Lhs1p[Endoplasmic Reticulum] + 5 ADP[Endoplasmic Reticulum] + 5 Kar2p[Endoplasmic Reticulum] protein folding	protein folding	Lhs1p;Sil1p
S000005371-7-G5[Endoplasmic Reticulum] + Sar1-GTP[Endoplasmic Reticulum] + Sec23-Sec24C[Cytoplasm] + Emp24p[Endoplasmic Reticulum] + Bet1p[Endoplasmic Reticulum] + Bos1p[Endoplasmic Reticulum] => S000005371-F-G7-COPII-pbud-cplx[Endoplasmic Reticulum]	COPII(for GPI-anchored cargo)	Sar1p;Sec23p;Sec24p;Bet1p;Bos1p;Emp24p
S000005371-F-G7orG5-COPII-pbud-cplx[Endoplasmic Reticulum] + Sec13-Sec31C[Cytoplasm] + Sec16p[Endoplasmic Reticulum] + Sed4p[Endoplasmic Reticulum] + Sec17p[Endoplasmic Reticulum] => S000005371-F-G5orG7-COPII[COPII]	COPII(common	Sec13p;Sec31p;Sec16p;Sed4p;Sec17p;Sec22p
S000005371-F-G7-COPII[COPII] + TRAPPIC[COPII] + Ypt1p[COPII] + GTP[COPII] => S000005371-F-G7[Golgi] + sar1-GDP[Cytoplasm] + pi[Cytoplasm] + Sec13-Sec31C[Cytoplasm] + Sec16p[Cytoplasm] + Sec23p[COPII] + Sec24p[COPII] + Emp24p[Endoplasmic Reticulum] + Bet3p[Cytoplasm] + Bet5p[Cytoplasm] + Trs20p[Cytoplasm] + Trs23p[Cytoplasm] + Trs31p[Cytoplasm] + Trs33p[Cytoplasm] + Bet1p[Endoplasmic Reticulum] + …	COPII(for GPI-anchored cargo)	Ypt1p;Uso1p;bug1p;Bet3p;Bet5p;Trs20p;Trs23p;Trs31p;Trs33p
S000005371-misf-G6[Cytoplasm] + 0.1 Ssm4p[Endoplasmic Reticulum] + 0.1 SSH1C[Endoplasmic Reticulum] + 0.1 AAAC[Cytoplasm] => S000005371-misf-G6-UBcplx[Cytoplasm]	ERADC	Sbh1p;Sss1p;Ssh1p;Ubx2p;Cdc48p;Ufd1p;Npl4p;Ssm4p
S000005371-misf-G6-UBcplx[Endoplasmic Reticulum] + 5 ATP[Cytoplasm] + 5 Ubiquitin[Cytoplasm] => S000005371-misf-G6-Ubiquitin[Cytoplasm] + 5 ADP[Cytoplasm] + 0.1 Ssm4p[Endoplasmic Reticulum] + 0.1 Sbh1p[Endoplasmic Reticulum] + 0.1 Sss1p[Endoplasmic Reticulum] + 0.1 Ssh1p[Endoplasmic Reticulum] + 0.1 Ubx2p[Endoplasmic Reticulum] + 0.1 Cdc48p[Cytoplasm] + 0.1 Ufd1p[Cytoplasm] + 0.1 Npl4p[Cytoplasm]…	ERADC	Ubiquitin
S000005371-misf-G6-Ubiquitin[Cytoplasm] + 0.1 Png1p[Cytoplasm] + 5 ATP[Cytoplasm] + 0.1 26sproteosome[Cytoplasm] + 5 H2O[Cytoplasm] => G6[Cytoplasm] + 5 Ubiquitin[Cytoplasm] + 5 ADP[Cytoplasm] + 5 pi[Cytoplasm] + 0.1 S000005371aa[Cytoplasm]	ERADC	Png1p; 26sproteosome
S000005371-G5orG7[Golgi] + GDP-man[Golgi] => S000005371-G9[Golgi] + GDP[Golgi]	Golgi processing	Och1p
S000005371-G9[Golgi] + 5 GDP-man[Golgi] => S000005371-G10[Golgi] + 5 GDP[Golgi]	Golgi processing	Mnn9p;Van1p
S000005371-G10[Golgi] + 40 GDP-man[Golgi] => S000005371-G11[Golgi] + 40 GDP[Golgi]	Golgi processing	Anp1p;Mnn9p;Mnn10p;Mnn11p;Hoc1p
S000005371-G15[Golgi] => S000005371-G16[Golgi] + aminoacid[Golgi]	Golgi processing	Kex1p;Kex2p;Ste13p
S000005371-M1[Golgi] + GTP[Cytoplasm] + clathrinC[Cytoplasm] + Arf1p[Cytoplasm] + EXOC[Cytoplasm] => S000005371-M1[cell membrane] + GDP[Golgi] + 2 Chc1p[Cytoplasm] + Clc1p[Cytoplasm] + Arf1p[Cytoplasm] + Sec3p[Cytoplasm] + Sec5p[Cytoplasm] + Sec6p[Cytoplasm] + Sec8p[Cytoplasm] + Sec10p[Cytoplasm] + Sec15p[Cytoplasm] + Exo70p[Cytoplasm] + Exo84p[Cytoplasm] + Sec4p[Cytoplasm]	LDSV(low density Secretory vesicle)	Arf1p;Sec3p;Sec5p;Sec6p;Sec8p;Sec10p;Sec15p;Exo70p;Exo84p;Sec4p;Chc1p;Clc1p
S000000553[Cytoplasm] + SRPC[Cytoplasm] => S000000553-SRPC[Cytoplasm]	translocation from cytosol to ER (SRP-dependent)	Srp14p;Srp21p;Srp54p;Sec65p;Srp68p;Srp72p
S000000553-SRPC[Cytoplasm] + SRC[Endoplasmic Reticulum] => S000000553-SRPC-SRC[Cytoplasm]	translocation from cytosol to ER (SRP-dependent)	Srp101p;Srp102p
S000000553-SRPC-SRC[Cytoplasm] + 2 GTP[Cytoplasm] + SEC61C[Endoplasmic Reticulum] => S000000553-SRPC-SRC-SEC61C[Cytoplasm]	translocation from cytosol to ER (SRP-dependent)	Sec61p;Sbh1p;Sss1p;Ssh1p
S000000553-SRPC-SRC-SEC61C[Cytoplasm] => S000000553-SEC61C[Cytoplasm] + Srp14p[Cytoplasm] + Srp21p[Cytoplasm] + Srp68p[Cytoplasm] + Sec65p[Cytoplasm] + Srp72p[Cytoplasm] + scR1[Cytoplasm] + Srp54p[Cytoplasm] + Srp51p[Cytoplasm] + Srp52p[Cytoplasm] + 2 GDP[Cytoplasm] + 2 pi[Cytoplasm]	translocation from cytosol to ER (SRP-dependent)
S000000553-SEC61C[Cytoplasm] + SPC[Endoplasmic Reticulum] => S000000553[Endoplasmic Reticulum] + Sec61p[Endoplasmic Reticulum] + Sbh1p[Endoplasmic Reticulum] + Sss1p[Endoplasmic Reticulum] + Sec11p[Endoplasmic Reticulum] + Spc1p[Endoplasmic Reticulum] + Spc2p[Endoplasmic Reticulum] + Spc3p[Endoplasmic Reticulum] + sp[Cytoplasm]	translocation from cytosol to ER (SRP-dependent)	Sec11p;Spc1p;Spc2p;Spc3p
S000000553-G5[Endoplasmic Reticulum] + 1 Acyl-PI-GlcN-(man)4-(EtNP)3[Endoplasmic Reticulum] => S000000553-G6[Endoplasmic Reticulum]	GPI biosynthesis	Gaa1p;Gpi8p;Gpi16p;Gpi17p;Gab1p
S000000553-G6[Endoplasmic Reticulum]=> S000000553-G6[Endoplasmic Reticulum] + ?acyl[Endoplasmic Reticulum]	GPI biosynthesis	Bst1p
S000000553-SEC61C[Endoplasmic Reticulum] + 3 Dol-pp-GlcNAc(2)man(9)-Glc(3)[Endoplasmic Reticulum] + OSTC[Endoplasmic Reticulum] => S000000553-G1-SEC61C[Endoplasmic Reticulum] + 3 Dol-ppEndoplasmic Reticulum] + Ost1p[Endoplasmic Reticulum] + Ost2p[Endoplasmic Reticulum] + St3p[Endoplasmic Reticulum] + Ost4p[Endoplasmic Reticulum] + Ost5p[Endoplasmic Reticulum] + Ost6p[Endoplasmic Reticulum] + Stt3…	ER N-glycosylation	Stt3p;Ost1p;Wbp1p;OSt3p;Ost6p;Swp1p;Ost2p;Ost5p;Ost4p
S000000553-G1-SEC61C[Endoplasmic Reticulum] => S000000553-G1[Endoplasmic Reticulum] + SEC61C[Endoplasmic Reticulum]	protein folding
S000000553-G1[Endoplasmic Reticulum] => S000000553-G2[Endoplasmic Reticulum] + Glc[Endoplasmic Reticulum]	protein folding	Cwh41p
S000000553-G2[Endoplasmic Reticulum] => S000000553-G3[Endoplasmic Reticulum] + Glc[Endoplasmic Reticulum]	protein folding	Rot2p
S000000553-G3[Endoplasmic Reticulum] => S000000553-G4[Endoplasmic Reticulum] + Glc[Endoplasmic Reticulum]	protein folding	Rot2p
S000000553-G4[Endoplasmic Reticulum] => S000000553-G5[Endoplasmic Reticulum] + man[Endoplasmic Reticulum]	protein folding	Mns1p
S000000553-G5[Endoplasmic Reticulum] + 5 Kar2p[Endoplasmic Reticulum] + 5 ATP[Endoplasmic Reticulum] + 5 Scj1p[Endoplasmic Reticulum] + 5 Jem1p[Endoplasmic Reticulum] + 5 Sec63p[Endoplasmic Reticulum] => S000000553-G5-Kar2ATPcplx[Endoplasmic Reticulum]	protein folding	Kar2p;Scj1p;Jem1p;Sec63p
S000000553-G5-Kar2ATPcplx-[Endoplasmic Reticulum] => S000000553-F-G5-Kar2ADPcplx[Endoplasmic Reticulum] + 5 Scj1p[Endoplasmic Reticulum] + 5 Jem1p[Endoplasmic Reticulum] + 5 pi[Endoplasmic Reticulum] + Sec63p[Endoplasmic Reticulum]	protein folding
S000000553-F-G5-Kar2ADPcplx[Endoplasmic Reticulum] + 5 Sil1p[Endoplasmic Reticulum] + 5 Lhs1p[Endoplasmic Reticulum] + 5 ATP[Endoplasmic Reticulum] => S000000553-F-G5[Endoplasmic Reticulum] + 5 Sil1p[Endoplasmic Reticulum] + 5 Lhs1p[Endoplasmic Reticulum] + 5 ADP[Endoplasmic Reticulum] + 5 Kar2p[Endoplasmic Reticulum] protein folding	protein folding	Lhs1p;Sil1p
S000000553-7-G5[Endoplasmic Reticulum] + Sar1-GTP[Endoplasmic Reticulum] + Sec23-Sec24C[Cytoplasm] + Emp24p[Endoplasmic Reticulum] + Bet1p[Endoplasmic Reticulum] + Bos1p[Endoplasmic Reticulum] => S000000553-F-G7-COPII-pbud-cplx[Endoplasmic Reticulum]	COPII(for GPI-anchored cargo)	Sar1p;Sec23p;Sec24p;Bet1p;Bos1p;Emp24p
S000000553-F-G7orG5-COPII-pbud-cplx[Endoplasmic Reticulum] + Sec13-Sec31C[Cytoplasm] + Sec16p[Endoplasmic Reticulum] + Sed4p[Endoplasmic Reticulum] + Sec17p[Endoplasmic Reticulum] => S000000553-F-G5orG7-COPII[COPII]	COPII(common	Sec13p;Sec31p;Sec16p;Sed4p;Sec17p;Sec22p
S000000553-F-G7-COPII[COPII] + TRAPPIC[COPII] + Ypt1p[COPII] + GTP[COPII] => S000000553-F-G7[Golgi] + sar1-GDP[Cytoplasm] + pi[Cytoplasm] + Sec13-Sec31C[Cytoplasm] + Sec16p[Cytoplasm] + Sec23p[COPII] + Sec24p[COPII] + Emp24p[Endoplasmic Reticulum] + Bet3p[Cytoplasm] + Bet5p[Cytoplasm] + Trs20p[Cytoplasm] + Trs23p[Cytoplasm] + Trs31p[Cytoplasm] + Trs33p[Cytoplasm] + Bet1p[Endoplasmic Reticulum] + …	COPII(for GPI-anchored cargo)	Ypt1p;Uso1p;bug1p;Bet3p;Bet5p;Trs20p;Trs23p;Trs31p;Trs33p
S000000553-misf-G6[Cytoplasm] + 0.1 Ssm4p[Endoplasmic Reticulum] + 0.1 SSH1C[Endoplasmic Reticulum] + 0.1 AAAC[Cytoplasm] => S000000553-misf-G6-UBcplx[Cytoplasm]	ERADC	Sbh1p;Sss1p;Ssh1p;Ubx2p;Cdc48p;Ufd1p;Npl4p;Ssm4p
S000000553-misf-G6-UBcplx[Endoplasmic Reticulum] + 5 ATP[Cytoplasm] + 5 Ubiquitin[Cytoplasm] => S000000553-misf-G6-Ubiquitin[Cytoplasm] + 5 ADP[Cytoplasm] + 0.1 Ssm4p[Endoplasmic Reticulum] + 0.1 Sbh1p[Endoplasmic Reticulum] + 0.1 Sss1p[Endoplasmic Reticulum] + 0.1 Ssh1p[Endoplasmic Reticulum] + 0.1 Ubx2p[Endoplasmic Reticulum] + 0.1 Cdc48p[Cytoplasm] + 0.1 Ufd1p[Cytoplasm] + 0.1 Npl4p[Cytoplasm]…	ERADC	Ubiquitin
S000000553-misf-G6-Ubiquitin[Cytoplasm] + 0.1 Png1p[Cytoplasm] + 5 ATP[Cytoplasm] + 0.1 26sproteosome[Cytoplasm] + 5 H2O[Cytoplasm] => G6[Cytoplasm] + 5 Ubiquitin[Cytoplasm] + 5 ADP[Cytoplasm] + 5 pi[Cytoplasm] + 0.1 S000000553aa[Cytoplasm]	ERADC	Png1p; 26sproteosome
S000000553-G5orG7[Golgi] + GDP-man[Golgi] => S000000553-G9[Golgi] + GDP[Golgi]	Golgi processing	Och1p
S000000553-G9[Golgi] + 5 GDP-man[Golgi] => S000000553-G10[Golgi] + 5 GDP[Golgi]	Golgi processing	Mnn9p;Van1p
S000000553-G10[Golgi] + 40 GDP-man[Golgi] => S000000553-G11[Golgi] + 40 GDP[Golgi]	Golgi processing	Anp1p;Mnn9p;Mnn10p;Mnn11p;Hoc1p
S000000553-G15[Golgi] => S000000553-G16[Golgi] + aminoacid[Golgi]	Golgi processing	Kex1p;Kex2p;Ste13p
S000000553-M1[Golgi] + GTP[Cytoplasm] + clathrinC[Cytoplasm] + Arf1p[Cytoplasm] + EXOC[Cytoplasm] => S000000553-M1[cell membrane] + GDP[Golgi] + 2 Chc1p[Cytoplasm] + Clc1p[Cytoplasm] + Arf1p[Cytoplasm] + Sec3p[Cytoplasm] + Sec5p[Cytoplasm] + Sec6p[Cytoplasm] + Sec8p[Cytoplasm] + Sec10p[Cytoplasm] + Sec15p[Cytoplasm] + Exo70p[Cytoplasm] + Exo84p[Cytoplasm] + Sec4p[Cytoplasm]	LDSV(low density Secretory vesicle)	Arf1p;Sec3p;Sec5p;Sec6p;Sec8p;Sec10p;Sec15p;Exo70p;Exo84p;Sec4p;Chc1p;Clc1p
S000002930[Cytoplasm] + SRPC[Cytoplasm] => S000002930-SRPC[Cytoplasm]	translocation from cytosol to ER (SRP-dependent)	Srp14p;Srp21p;Srp54p;Sec65p;Srp68p;Srp72p
S000002930-SRPC[Cytoplasm] + SRC[Endoplasmic Reticulum] => S000002930-SRPC-SRC[Cytoplasm]	translocation from cytosol to ER (SRP-dependent)	Srp101p;Srp102p
S000002930-SRPC-SRC[Cytoplasm] + 2 GTP[Cytoplasm] + SEC61C[Endoplasmic Reticulum] => S000002930-SRPC-SRC-SEC61C[Cytoplasm]	translocation from cytosol to ER (SRP-dependent)	Sec61p;Sbh1p;Sss1p;Ssh1p
S000002930-SRPC-SRC-SEC61C[Cytoplasm] => S000002930-SEC61C[Cytoplasm] + Srp14p[Cytoplasm] + Srp21p[Cytoplasm] + Srp68p[Cytoplasm] + Sec65p[Cytoplasm] + Srp72p[Cytoplasm] + scR1[Cytoplasm] + Srp54p[Cytoplasm] + Srp51p[Cytoplasm] + Srp52p[Cytoplasm] + 2 GDP[Cytoplasm] + 2 pi[Cytoplasm]	translocation from cytosol to ER (SRP-dependent)
S000002930-SEC61C[Cytoplasm] + SPC[Endoplasmic Reticulum] => S000002930[Endoplasmic Reticulum] + Sec61p[Endoplasmic Reticulum] + Sbh1p[Endoplasmic Reticulum] + Sss1p[Endoplasmic Reticulum] + Sec11p[Endoplasmic Reticulum] + Spc1p[Endoplasmic Reticulum] + Spc2p[Endoplasmic Reticulum] + Spc3p[Endoplasmic Reticulum] + sp[Cytoplasm]	translocation from cytosol to ER (SRP-dependent)	Sec11p;Spc1p;Spc2p;Spc3p
S000002930-G5[Endoplasmic Reticulum] + 1 Acyl-PI-GlcN-(man)4-(EtNP)3[Endoplasmic Reticulum] => S000002930-G6[Endoplasmic Reticulum]	GPI biosynthesis	Gaa1p;Gpi8p;Gpi16p;Gpi17p;Gab1p
S000002930-G6[Endoplasmic Reticulum]=> S000002930-G6[Endoplasmic Reticulum] + ?acyl[Endoplasmic Reticulum]	GPI biosynthesis	Bst1p
S000002930-SEC61C[Endoplasmic Reticulum] + 7 Dol-pp-GlcNAc(2)man(9)-Glc(3)[Endoplasmic Reticulum] + OSTC[Endoplasmic Reticulum] => S000002930-G1-SEC61C[Endoplasmic Reticulum] + 7 Dol-ppEndoplasmic Reticulum] + Ost1p[Endoplasmic Reticulum] + Ost2p[Endoplasmic Reticulum] + St3p[Endoplasmic Reticulum] + Ost4p[Endoplasmic Reticulum] + Ost5p[Endoplasmic Reticulum] + Ost6p[Endoplasmic Reticulum] + Stt3…	ER N-glycosylation	Stt3p;Ost1p;Wbp1p;OSt3p;Ost6p;Swp1p;Ost2p;Ost5p;Ost4p
S000002930-G1-SEC61C[Endoplasmic Reticulum] => S000002930-G1[Endoplasmic Reticulum] + SEC61C[Endoplasmic Reticulum]	protein folding
S000002930-G1[Endoplasmic Reticulum] => S000002930-G2[Endoplasmic Reticulum] + Glc[Endoplasmic Reticulum]	protein folding	Cwh41p
S000002930-G2[Endoplasmic Reticulum] => S000002930-G3[Endoplasmic Reticulum] + Glc[Endoplasmic Reticulum]	protein folding	Rot2p
S000002930-G3[Endoplasmic Reticulum] => S000002930-G4[Endoplasmic Reticulum] + Glc[Endoplasmic Reticulum]	protein folding	Rot2p
S000002930-G4[Endoplasmic Reticulum] => S000002930-G5[Endoplasmic Reticulum] + man[Endoplasmic Reticulum]	protein folding	Mns1p
S000002930-G5[Endoplasmic Reticulum] + 5 Kar2p[Endoplasmic Reticulum] + 5 ATP[Endoplasmic Reticulum] + 5 Scj1p[Endoplasmic Reticulum] + 5 Jem1p[Endoplasmic Reticulum] + 5 Sec63p[Endoplasmic Reticulum] => S000002930-G5-Kar2ATPcplx[Endoplasmic Reticulum]	protein folding	Kar2p;Scj1p;Jem1p;Sec63p
S000002930-G5-Kar2ATPcplx-[Endoplasmic Reticulum] => S000002930-F-G5-Kar2ADPcplx[Endoplasmic Reticulum] + 5 Scj1p[Endoplasmic Reticulum] + 5 Jem1p[Endoplasmic Reticulum] + 5 pi[Endoplasmic Reticulum] + Sec63p[Endoplasmic Reticulum]	protein folding
S000002930-F-G5-Kar2ADPcplx[Endoplasmic Reticulum] + 5 Sil1p[Endoplasmic Reticulum] + 5 Lhs1p[Endoplasmic Reticulum] + 5 ATP[Endoplasmic Reticulum] => S000002930-F-G5[Endoplasmic Reticulum] + 5 Sil1p[Endoplasmic Reticulum] + 5 Lhs1p[Endoplasmic Reticulum] + 5 ADP[Endoplasmic Reticulum] + 5 Kar2p[Endoplasmic Reticulum] protein folding	protein folding	Lhs1p;Sil1p
S000002930-7-G5[Endoplasmic Reticulum] + Sar1-GTP[Endoplasmic Reticulum] + Sec23-Sec24C[Cytoplasm] + Emp24p[Endoplasmic Reticulum] + Bet1p[Endoplasmic Reticulum] + Bos1p[Endoplasmic Reticulum] => S000002930-F-G7-COPII-pbud-cplx[Endoplasmic Reticulum]	COPII(for GPI-anchored cargo)	Sar1p;Sec23p;Sec24p;Bet1p;Bos1p;Emp24p
S000002930-F-G7orG5-COPII-pbud-cplx[Endoplasmic Reticulum] + Sec13-Sec31C[Cytoplasm] + Sec16p[Endoplasmic Reticulum] + Sed4p[Endoplasmic Reticulum] + Sec17p[Endoplasmic Reticulum] => S000002930-F-G5orG7-COPII[COPII]	COPII(common	Sec13p;Sec31p;Sec16p;Sed4p;Sec17p;Sec22p
S000002930-F-G7-COPII[COPII] + TRAPPIC[COPII] + Ypt1p[COPII] + GTP[COPII] => S000002930-F-G7[Golgi] + sar1-GDP[Cytoplasm] + pi[Cytoplasm] + Sec13-Sec31C[Cytoplasm] + Sec16p[Cytoplasm] + Sec23p[COPII] + Sec24p[COPII] + Emp24p[Endoplasmic Reticulum] + Bet3p[Cytoplasm] + Bet5p[Cytoplasm] + Trs20p[Cytoplasm] + Trs23p[Cytoplasm] + Trs31p[Cytoplasm] + Trs33p[Cytoplasm] + Bet1p[Endoplasmic Reticulum] + …	COPII(for GPI-anchored cargo)	Ypt1p;Uso1p;bug1p;Bet3p;Bet5p;Trs20p;Trs23p;Trs31p;Trs33p
S000002930-misf-G6[Cytoplasm] + 0.1 Ssm4p[Endoplasmic Reticulum] + 0.1 SSH1C[Endoplasmic Reticulum] + 0.1 AAAC[Cytoplasm] => S000002930-misf-G6-UBcplx[Cytoplasm]	ERADC	Sbh1p;Sss1p;Ssh1p;Ubx2p;Cdc48p;Ufd1p;Npl4p;Ssm4p
S000002930-misf-G6-UBcplx[Endoplasmic Reticulum] + 5 ATP[Cytoplasm] + 5 Ubiquitin[Cytoplasm] => S000002930-misf-G6-Ubiquitin[Cytoplasm] + 5 ADP[Cytoplasm] + 0.1 Ssm4p[Endoplasmic Reticulum] + 0.1 Sbh1p[Endoplasmic Reticulum] + 0.1 Sss1p[Endoplasmic Reticulum] + 0.1 Ssh1p[Endoplasmic Reticulum] + 0.1 Ubx2p[Endoplasmic Reticulum] + 0.1 Cdc48p[Cytoplasm] + 0.1 Ufd1p[Cytoplasm] + 0.1 Npl4p[Cytoplasm]…	ERADC	Ubiquitin
S000002930-misf-G6-Ubiquitin[Cytoplasm] + 0.1 Png1p[Cytoplasm] + 5 ATP[Cytoplasm] + 0.1 26sproteosome[Cytoplasm] + 5 H2O[Cytoplasm] => G6[Cytoplasm] + 5 Ubiquitin[Cytoplasm] + 5 ADP[Cytoplasm] + 5 pi[Cytoplasm] + 0.1 S000002930aa[Cytoplasm]	ERADC	Png1p; 26sproteosome
S000002930-G5orG7[Golgi] + GDP-man[Golgi] => S000002930-G9[Golgi] + GDP[Golgi]	Golgi processing	Och1p
S000002930-G9[Golgi] + 5 GDP-man[Golgi] => S000002930-G10[Golgi] + 5 GDP[Golgi]	Golgi processing	Mnn9p;Van1p
S000002930-G10[Golgi] + 40 GDP-man[Golgi] => S000002930-G11[Golgi] + 40 GDP[Golgi]	Golgi processing	Anp1p;Mnn9p;Mnn10p;Mnn11p;Hoc1p
S000002930-G15[Golgi] => S000002930-G16[Golgi] + aminoacid[Golgi]	Golgi processing	Kex1p;Kex2p;Ste13p
S000002930-M1[Golgi] + GTP[Cytoplasm] + clathrinC[Cytoplasm] + Arf1p[Cytoplasm] + EXOC[Cytoplasm] => S000002930-M1[cell membrane] + GDP[Golgi] + 2 Chc1p[Cytoplasm] + Clc1p[Cytoplasm] + Arf1p[Cytoplasm] + Sec3p[Cytoplasm] + Sec5p[Cytoplasm] + Sec6p[Cytoplasm] + Sec8p[Cytoplasm] + Sec10p[Cytoplasm] + Sec15p[Cytoplasm] + Exo70p[Cytoplasm] + Exo84p[Cytoplasm] + Sec4p[Cytoplasm]	LDSV(low density Secretory vesicle)	Arf1p;Sec3p;Sec5p;Sec6p;Sec8p;Sec10p;Sec15p;Exo70p;Exo84p;Sec4p;Chc1p;Clc1p
S000002144[Cytoplasm] + SRPC[Cytoplasm] => S000002144-SRPC[Cytoplasm]	translocation from cytosol to ER (SRP-dependent)	Srp14p;Srp21p;Srp54p;Sec65p;Srp68p;Srp72p
S000002144-SRPC[Cytoplasm] + SRC[Endoplasmic Reticulum] => S000002144-SRPC-SRC[Cytoplasm]	translocation from cytosol to ER (SRP-dependent)	Srp101p;Srp102p
S000002144-SRPC-SRC[Cytoplasm] + 2 GTP[Cytoplasm] + SEC61C[Endoplasmic Reticulum] => S000002144-SRPC-SRC-SEC61C[Cytoplasm]	translocation from cytosol to ER (SRP-dependent)	Sec61p;Sbh1p;Sss1p;Ssh1p
S000002144-SRPC-SRC-SEC61C[Cytoplasm] => S000002144-SEC61C[Cytoplasm] + Srp14p[Cytoplasm] + Srp21p[Cytoplasm] + Srp68p[Cytoplasm] + Sec65p[Cytoplasm] + Srp72p[Cytoplasm] + scR1[Cytoplasm] + Srp54p[Cytoplasm] + Srp51p[Cytoplasm] + Srp52p[Cytoplasm] + 2 GDP[Cytoplasm] + 2 pi[Cytoplasm]	translocation from cytosol to ER (SRP-dependent)
S000002144-SEC61C[Cytoplasm] + SPC[Endoplasmic Reticulum] => S000002144[Endoplasmic Reticulum] + Sec61p[Endoplasmic Reticulum] + Sbh1p[Endoplasmic Reticulum] + Sss1p[Endoplasmic Reticulum] + Sec11p[Endoplasmic Reticulum] + Spc1p[Endoplasmic Reticulum] + Spc2p[Endoplasmic Reticulum] + Spc3p[Endoplasmic Reticulum] + sp[Cytoplasm]	translocation from cytosol to ER (SRP-dependent)	Sec11p;Spc1p;Spc2p;Spc3p
S000002144-G5[Endoplasmic Reticulum] + 2 Acyl-PI-GlcN-(man)4-(EtNP)3[Endoplasmic Reticulum] => S000002144-G6[Endoplasmic Reticulum]	GPI biosynthesis	Gaa1p;Gpi8p;Gpi16p;Gpi17p;Gab1p
S000002144-G6[Endoplasmic Reticulum]=> S000002144-G6[Endoplasmic Reticulum] + ?acyl[Endoplasmic Reticulum]	GPI biosynthesis	Bst1p
S000002144-SEC61C[Endoplasmic Reticulum] + 2 Dol-pp-GlcNAc(2)man(9)-Glc(3)[Endoplasmic Reticulum] + OSTC[Endoplasmic Reticulum] => S000002144-G1-SEC61C[Endoplasmic Reticulum] + 2 Dol-ppEndoplasmic Reticulum] + Ost1p[Endoplasmic Reticulum] + Ost2p[Endoplasmic Reticulum] + St3p[Endoplasmic Reticulum] + Ost4p[Endoplasmic Reticulum] + Ost5p[Endoplasmic Reticulum] + Ost6p[Endoplasmic Reticulum] + Stt3…	ER N-glycosylation	Stt3p;Ost1p;Wbp1p;OSt3p;Ost6p;Swp1p;Ost2p;Ost5p;Ost4p
S000002144-G1-SEC61C[Endoplasmic Reticulum] => S000002144-G1[Endoplasmic Reticulum] + SEC61C[Endoplasmic Reticulum]	protein folding
S000002144-G1[Endoplasmic Reticulum] => S000002144-G2[Endoplasmic Reticulum] + Glc[Endoplasmic Reticulum]	protein folding	Cwh41p
S000002144-G2[Endoplasmic Reticulum] => S000002144-G3[Endoplasmic Reticulum] + Glc[Endoplasmic Reticulum]	protein folding	Rot2p
S000002144-G3[Endoplasmic Reticulum] => S000002144-G4[Endoplasmic Reticulum] + Glc[Endoplasmic Reticulum]	protein folding	Rot2p
S000002144-G4[Endoplasmic Reticulum] => S000002144-G5[Endoplasmic Reticulum] + man[Endoplasmic Reticulum]	protein folding	Mns1p
S000002144-G5[Endoplasmic Reticulum] + 5 Kar2p[Endoplasmic Reticulum] + 5 ATP[Endoplasmic Reticulum] + 5 Scj1p[Endoplasmic Reticulum] + 5 Jem1p[Endoplasmic Reticulum] + 5 Sec63p[Endoplasmic Reticulum] => S000002144-G5-Kar2ATPcplx[Endoplasmic Reticulum]	protein folding	Kar2p;Scj1p;Jem1p;Sec63p
S000002144-G5-Kar2ATPcplx-[Endoplasmic Reticulum] => S000002144-F-G5-Kar2ADPcplx[Endoplasmic Reticulum] + 5 Scj1p[Endoplasmic Reticulum] + 5 Jem1p[Endoplasmic Reticulum] + 5 pi[Endoplasmic Reticulum] + Sec63p[Endoplasmic Reticulum]	protein folding
S000002144-F-G5-Kar2ADPcplx[Endoplasmic Reticulum] + 5 Sil1p[Endoplasmic Reticulum] + 5 Lhs1p[Endoplasmic Reticulum] + 5 ATP[Endoplasmic Reticulum] => S000002144-F-G5[Endoplasmic Reticulum] + 5 Sil1p[Endoplasmic Reticulum] + 5 Lhs1p[Endoplasmic Reticulum] + 5 ADP[Endoplasmic Reticulum] + 5 Kar2p[Endoplasmic Reticulum] protein folding	protein folding	Lhs1p;Sil1p
S000002144-7-G5[Endoplasmic Reticulum] + Sar1-GTP[Endoplasmic Reticulum] + Sec23-Sec24C[Cytoplasm] + Emp24p[Endoplasmic Reticulum] + Bet1p[Endoplasmic Reticulum] + Bos1p[Endoplasmic Reticulum] => S000002144-F-G7-COPII-pbud-cplx[Endoplasmic Reticulum]	COPII(for GPI-anchored cargo)	Sar1p;Sec23p;Sec24p;Bet1p;Bos1p;Emp24p
S000002144-F-G7orG5-COPII-pbud-cplx[Endoplasmic Reticulum] + Sec13-Sec31C[Cytoplasm] + Sec16p[Endoplasmic Reticulum] + Sed4p[Endoplasmic Reticulum] + Sec17p[Endoplasmic Reticulum] => S000002144-F-G5orG7-COPII[COPII]	COPII(common	Sec13p;Sec31p;Sec16p;Sed4p;Sec17p;Sec22p
S000002144-F-G7-COPII[COPII] + TRAPPIC[COPII] + Ypt1p[COPII] + GTP[COPII] => S000002144-F-G7[Golgi] + sar1-GDP[Cytoplasm] + pi[Cytoplasm] + Sec13-Sec31C[Cytoplasm] + Sec16p[Cytoplasm] + Sec23p[COPII] + Sec24p[COPII] + Emp24p[Endoplasmic Reticulum] + Bet3p[Cytoplasm] + Bet5p[Cytoplasm] + Trs20p[Cytoplasm] + Trs23p[Cytoplasm] + Trs31p[Cytoplasm] + Trs33p[Cytoplasm] + Bet1p[Endoplasmic Reticulum] + …	COPII(for GPI-anchored cargo)	Ypt1p;Uso1p;bug1p;Bet3p;Bet5p;Trs20p;Trs23p;Trs31p;Trs33p
S000002144-misf-G6[Cytoplasm] + 0.1 Ssm4p[Endoplasmic Reticulum] + 0.1 SSH1C[Endoplasmic Reticulum] + 0.1 AAAC[Cytoplasm] => S000002144-misf-G6-UBcplx[Cytoplasm]	ERADC	Sbh1p;Sss1p;Ssh1p;Ubx2p;Cdc48p;Ufd1p;Npl4p;Ssm4p
S000002144-misf-G6-UBcplx[Endoplasmic Reticulum] + 5 ATP[Cytoplasm] + 5 Ubiquitin[Cytoplasm] => S000002144-misf-G6-Ubiquitin[Cytoplasm] + 5 ADP[Cytoplasm] + 0.1 Ssm4p[Endoplasmic Reticulum] + 0.1 Sbh1p[Endoplasmic Reticulum] + 0.1 Sss1p[Endoplasmic Reticulum] + 0.1 Ssh1p[Endoplasmic Reticulum] + 0.1 Ubx2p[Endoplasmic Reticulum] + 0.1 Cdc48p[Cytoplasm] + 0.1 Ufd1p[Cytoplasm] + 0.1 Npl4p[Cytoplasm]…	ERADC	Ubiquitin
S000002144-misf-G6-Ubiquitin[Cytoplasm] + 0.1 Png1p[Cytoplasm] + 5 ATP[Cytoplasm] + 0.1 26sproteosome[Cytoplasm] + 5 H2O[Cytoplasm] => G6[Cytoplasm] + 5 Ubiquitin[Cytoplasm] + 5 ADP[Cytoplasm] + 5 pi[Cytoplasm] + 0.1 S000002144aa[Cytoplasm]	ERADC	Png1p; 26sproteosome
S000002144-G5orG7[Golgi] + GDP-man[Golgi] => S000002144-G9[Golgi] + GDP[Golgi]	Golgi processing	Och1p
S000002144-G9[Golgi] + 5 GDP-man[Golgi] => S000002144-G10[Golgi] + 5 GDP[Golgi]	Golgi processing	Mnn9p;Van1p
S000002144-G10[Golgi] + 40 GDP-man[Golgi] => S000002144-G11[Golgi] + 40 GDP[Golgi]	Golgi processing	Anp1p;Mnn9p;Mnn10p;Mnn11p;Hoc1p
S000002144-G15[Golgi] => S000002144-G16[Golgi] + aminoacid[Golgi]	Golgi processing	Kex1p;Kex2p;Ste13p
S000002144-M1[Golgi] + GTP[Cytoplasm] + clathrinC[Cytoplasm] + Arf1p[Cytoplasm] + EXOC[Cytoplasm] => S000002144-M1[cell membrane] + GDP[Golgi] + 2 Chc1p[Cytoplasm] + Clc1p[Cytoplasm] + Arf1p[Cytoplasm] + Sec3p[Cytoplasm] + Sec5p[Cytoplasm] + Sec6p[Cytoplasm] + Sec8p[Cytoplasm] + Sec10p[Cytoplasm] + Sec15p[Cytoplasm] + Exo70p[Cytoplasm] + Exo84p[Cytoplasm] + Sec4p[Cytoplasm]	LDSV(low density Secretory vesicle)	Arf1p;Sec3p;Sec5p;Sec6p;Sec8p;Sec10p;Sec15p;Exo70p;Exo84p;Sec4p;Chc1p;Clc1p
S000087203[Cytoplasm] + SRPC[Cytoplasm] => S000087203-SRPC[Cytoplasm]	translocation from cytosol to ER (SRP-dependent)	Srp14p;Srp21p;Srp54p;Sec65p;Srp68p;Srp72p
S000087203-SRPC[Cytoplasm] + SRC[Endoplasmic Reticulum] => S000087203-SRPC-SRC[Cytoplasm]	translocation from cytosol to ER (SRP-dependent)	Srp101p;Srp102p
S000087203-SRPC-SRC[Cytoplasm] + 2 GTP[Cytoplasm] + SEC61C[Endoplasmic Reticulum] => S000087203-SRPC-SRC-SEC61C[Cytoplasm]	translocation from cytosol to ER (SRP-dependent)	Sec61p;Sbh1p;Sss1p;Ssh1p
S000087203-SRPC-SRC-SEC61C[Cytoplasm] => S000087203-SEC61C[Cytoplasm] + Srp14p[Cytoplasm] + Srp21p[Cytoplasm] + Srp68p[Cytoplasm] + Sec65p[Cytoplasm] + Srp72p[Cytoplasm] + scR1[Cytoplasm] + Srp54p[Cytoplasm] + Srp51p[Cytoplasm] + Srp52p[Cytoplasm] + 2 GDP[Cytoplasm] + 2 pi[Cytoplasm]	translocation from cytosol to ER (SRP-dependent)
S000087203-SEC61C[Cytoplasm] + SPC[Endoplasmic Reticulum] => S000087203[Endoplasmic Reticulum] + Sec61p[Endoplasmic Reticulum] + Sbh1p[Endoplasmic Reticulum] + Sss1p[Endoplasmic Reticulum] + Sec11p[Endoplasmic Reticulum] + Spc1p[Endoplasmic Reticulum] + Spc2p[Endoplasmic Reticulum] + Spc3p[Endoplasmic Reticulum] + sp[Cytoplasm]	translocation from cytosol to ER (SRP-dependent)	Sec11p;Spc1p;Spc2p;Spc3p
S000087203-G5[Endoplasmic Reticulum] + 1 Acyl-PI-GlcN-(man)4-(EtNP)3[Endoplasmic Reticulum] => S000087203-G6[Endoplasmic Reticulum]	GPI biosynthesis	Gaa1p;Gpi8p;Gpi16p;Gpi17p;Gab1p
S000087203-G6[Endoplasmic Reticulum]=> S000087203-G6[Endoplasmic Reticulum] + ?acyl[Endoplasmic Reticulum]	GPI biosynthesis	Bst1p
S000087203-SEC61C[Endoplasmic Reticulum] + 4 Dol-pp-GlcNAc(2)man(9)-Glc(3)[Endoplasmic Reticulum] + OSTC[Endoplasmic Reticulum] => S000087203-G1-SEC61C[Endoplasmic Reticulum] + 4 Dol-ppEndoplasmic Reticulum] + Ost1p[Endoplasmic Reticulum] + Ost2p[Endoplasmic Reticulum] + St3p[Endoplasmic Reticulum] + Ost4p[Endoplasmic Reticulum] + Ost5p[Endoplasmic Reticulum] + Ost6p[Endoplasmic Reticulum] + Stt3…	ER N-glycosylation	Stt3p;Ost1p;Wbp1p;OSt3p;Ost6p;Swp1p;Ost2p;Ost5p;Ost4p
S000087203-G1-SEC61C[Endoplasmic Reticulum] => S000087203-G1[Endoplasmic Reticulum] + SEC61C[Endoplasmic Reticulum]	protein folding
S000087203-G1[Endoplasmic Reticulum] => S000087203-G2[Endoplasmic Reticulum] + Glc[Endoplasmic Reticulum]	protein folding	Cwh41p
S000087203-G2[Endoplasmic Reticulum] => S000087203-G3[Endoplasmic Reticulum] + Glc[Endoplasmic Reticulum]	protein folding	Rot2p
S000087203-G3[Endoplasmic Reticulum] => S000087203-G4[Endoplasmic Reticulum] + Glc[Endoplasmic Reticulum]	protein folding	Rot2p
S000087203-G4[Endoplasmic Reticulum] => S000087203-G5[Endoplasmic Reticulum] + man[Endoplasmic Reticulum]	protein folding	Mns1p
S000087203-G5[Endoplasmic Reticulum] + 5 Kar2p[Endoplasmic Reticulum] + 5 ATP[Endoplasmic Reticulum] + 5 Scj1p[Endoplasmic Reticulum] + 5 Jem1p[Endoplasmic Reticulum] + 5 Sec63p[Endoplasmic Reticulum] => S000087203-G5-Kar2ATPcplx[Endoplasmic Reticulum]	protein folding	Kar2p;Scj1p;Jem1p;Sec63p
S000087203-G5-Kar2ATPcplx-[Endoplasmic Reticulum] => S000087203-F-G5-Kar2ADPcplx[Endoplasmic Reticulum] + 5 Scj1p[Endoplasmic Reticulum] + 5 Jem1p[Endoplasmic Reticulum] + 5 pi[Endoplasmic Reticulum] + Sec63p[Endoplasmic Reticulum]	protein folding
S000087203-F-G5-Kar2ADPcplx[Endoplasmic Reticulum] + 5 Sil1p[Endoplasmic Reticulum] + 5 Lhs1p[Endoplasmic Reticulum] + 5 ATP[Endoplasmic Reticulum] => S000087203-F-G5[Endoplasmic Reticulum] + 5 Sil1p[Endoplasmic Reticulum] + 5 Lhs1p[Endoplasmic Reticulum] + 5 ADP[Endoplasmic Reticulum] + 5 Kar2p[Endoplasmic Reticulum] protein folding	protein folding	Lhs1p;Sil1p
S000087203-7-G5[Endoplasmic Reticulum] + Sar1-GTP[Endoplasmic Reticulum] + Sec23-Sec24C[Cytoplasm] + Emp24p[Endoplasmic Reticulum] + Bet1p[Endoplasmic Reticulum] + Bos1p[Endoplasmic Reticulum] => S000087203-F-G7-COPII-pbud-cplx[Endoplasmic Reticulum]	COPII(for GPI-anchored cargo)	Sar1p;Sec23p;Sec24p;Bet1p;Bos1p;Emp24p
S000087203-F-G7orG5-COPII-pbud-cplx[Endoplasmic Reticulum] + Sec13-Sec31C[Cytoplasm] + Sec16p[Endoplasmic Reticulum] + Sed4p[Endoplasmic Reticulum] + Sec17p[Endoplasmic Reticulum] => S000087203-F-G5orG7-COPII[COPII]	COPII(common	Sec13p;Sec31p;Sec16p;Sed4p;Sec17p;Sec22p
S000087203-F-G7-COPII[COPII] + TRAPPIC[COPII] + Ypt1p[COPII] + GTP[COPII] => S000087203-F-G7[Golgi] + sar1-GDP[Cytoplasm] + pi[Cytoplasm] + Sec13-Sec31C[Cytoplasm] + Sec16p[Cytoplasm] + Sec23p[COPII] + Sec24p[COPII] + Emp24p[Endoplasmic Reticulum] + Bet3p[Cytoplasm] + Bet5p[Cytoplasm] + Trs20p[Cytoplasm] + Trs23p[Cytoplasm] + Trs31p[Cytoplasm] + Trs33p[Cytoplasm] + Bet1p[Endoplasmic Reticulum] + …	COPII(for GPI-anchored cargo)	Ypt1p;Uso1p;bug1p;Bet3p;Bet5p;Trs20p;Trs23p;Trs31p;Trs33p
S000087203-misf-G6[Cytoplasm] + 0.1 Ssm4p[Endoplasmic Reticulum] + 0.1 SSH1C[Endoplasmic Reticulum] + 0.1 AAAC[Cytoplasm] => S000087203-misf-G6-UBcplx[Cytoplasm]	ERADC	Sbh1p;Sss1p;Ssh1p;Ubx2p;Cdc48p;Ufd1p;Npl4p;Ssm4p
S000087203-misf-G6-UBcplx[Endoplasmic Reticulum] + 5 ATP[Cytoplasm] + 5 Ubiquitin[Cytoplasm] => S000087203-misf-G6-Ubiquitin[Cytoplasm] + 5 ADP[Cytoplasm] + 0.1 Ssm4p[Endoplasmic Reticulum] + 0.1 Sbh1p[Endoplasmic Reticulum] + 0.1 Sss1p[Endoplasmic Reticulum] + 0.1 Ssh1p[Endoplasmic Reticulum] + 0.1 Ubx2p[Endoplasmic Reticulum] + 0.1 Cdc48p[Cytoplasm] + 0.1 Ufd1p[Cytoplasm] + 0.1 Npl4p[Cytoplasm]…	ERADC	Ubiquitin
S000087203-misf-G6-Ubiquitin[Cytoplasm] + 0.1 Png1p[Cytoplasm] + 5 ATP[Cytoplasm] + 0.1 26sproteosome[Cytoplasm] + 5 H2O[Cytoplasm] => G6[Cytoplasm] + 5 Ubiquitin[Cytoplasm] + 5 ADP[Cytoplasm] + 5 pi[Cytoplasm] + 0.1 S000087203aa[Cytoplasm]	ERADC	Png1p; 26sproteosome
S000087203-G5orG7[Golgi] + GDP-man[Golgi] => S000087203-G9[Golgi] + GDP[Golgi]	Golgi processing	Och1p
S000087203-G9[Golgi] + 5 GDP-man[Golgi] => S000087203-G10[Golgi] + 5 GDP[Golgi]	Golgi processing	Mnn9p;Van1p
S000087203-G10[Golgi] + 40 GDP-man[Golgi] => S000087203-G11[Golgi] + 40 GDP[Golgi]	Golgi processing	Anp1p;Mnn9p;Mnn10p;Mnn11p;Hoc1p
S000087203-G15[Golgi] => S000087203-G16[Golgi] + aminoacid[Golgi]	Golgi processing	Kex1p;Kex2p;Ste13p
S000087203-M1[Golgi] + GTP[Cytoplasm] + clathrinC[Cytoplasm] + Arf1p[Cytoplasm] + EXOC[Cytoplasm] => S000087203-M1[cell membrane] + GDP[Golgi] + 2 Chc1p[Cytoplasm] + Clc1p[Cytoplasm] + Arf1p[Cytoplasm] + Sec3p[Cytoplasm] + Sec5p[Cytoplasm] + Sec6p[Cytoplasm] + Sec8p[Cytoplasm] + Sec10p[Cytoplasm] + Sec15p[Cytoplasm] + Exo70p[Cytoplasm] + Exo84p[Cytoplasm] + Sec4p[Cytoplasm]	LDSV(low density Secretory vesicle)	Arf1p;Sec3p;Sec5p;Sec6p;Sec8p;Sec10p;Sec15p;Exo70p;Exo84p;Sec4p;Chc1p;Clc1p
S000028739[Cytoplasm] + SRPC[Cytoplasm] => S000028739-SRPC[Cytoplasm]	translocation from cytosol to ER (SRP-dependent)	Srp14p;Srp21p;Srp54p;Sec65p;Srp68p;Srp72p
S000028739-SRPC[Cytoplasm] + SRC[Endoplasmic Reticulum] => S000028739-SRPC-SRC[Cytoplasm]	translocation from cytosol to ER (SRP-dependent)	Srp101p;Srp102p
S000028739-SRPC-SRC[Cytoplasm] + 2 GTP[Cytoplasm] + SEC61C[Endoplasmic Reticulum] => S000028739-SRPC-SRC-SEC61C[Cytoplasm]	translocation from cytosol to ER (SRP-dependent)	Sec61p;Sbh1p;Sss1p;Ssh1p
S000028739-SRPC-SRC-SEC61C[Cytoplasm] => S000028739-SEC61C[Cytoplasm] + Srp14p[Cytoplasm] + Srp21p[Cytoplasm] + Srp68p[Cytoplasm] + Sec65p[Cytoplasm] + Srp72p[Cytoplasm] + scR1[Cytoplasm] + Srp54p[Cytoplasm] + Srp51p[Cytoplasm] + Srp52p[Cytoplasm] + 2 GDP[Cytoplasm] + 2 pi[Cytoplasm]	translocation from cytosol to ER (SRP-dependent)
S000028739-SEC61C[Cytoplasm] + SPC[Endoplasmic Reticulum] => S000028739[Endoplasmic Reticulum] + Sec61p[Endoplasmic Reticulum] + Sbh1p[Endoplasmic Reticulum] + Sss1p[Endoplasmic Reticulum] + Sec11p[Endoplasmic Reticulum] + Spc1p[Endoplasmic Reticulum] + Spc2p[Endoplasmic Reticulum] + Spc3p[Endoplasmic Reticulum] + sp[Cytoplasm]	translocation from cytosol to ER (SRP-dependent)	Sec11p;Spc1p;Spc2p;Spc3p
S000028739-G5[Endoplasmic Reticulum] + 1 Acyl-PI-GlcN-(man)4-(EtNP)3[Endoplasmic Reticulum] => S000028739-G6[Endoplasmic Reticulum]	GPI biosynthesis	Gaa1p;Gpi8p;Gpi16p;Gpi17p;Gab1p
S000028739-G6[Endoplasmic Reticulum]=> S000028739-G6[Endoplasmic Reticulum] + ?acyl[Endoplasmic Reticulum]	GPI biosynthesis	Bst1p
S000028739-SEC61C[Endoplasmic Reticulum] + 5 Dol-pp-GlcNAc(2)man(9)-Glc(3)[Endoplasmic Reticulum] + OSTC[Endoplasmic Reticulum] => S000028739-G1-SEC61C[Endoplasmic Reticulum] + 5 Dol-ppEndoplasmic Reticulum] + Ost1p[Endoplasmic Reticulum] + Ost2p[Endoplasmic Reticulum] + St3p[Endoplasmic Reticulum] + Ost4p[Endoplasmic Reticulum] + Ost5p[Endoplasmic Reticulum] + Ost6p[Endoplasmic Reticulum] + Stt3…	ER N-glycosylation	Stt3p;Ost1p;Wbp1p;OSt3p;Ost6p;Swp1p;Ost2p;Ost5p;Ost4p
S000028739-G1-SEC61C[Endoplasmic Reticulum] => S000028739-G1[Endoplasmic Reticulum] + SEC61C[Endoplasmic Reticulum]	protein folding
S000028739-G1[Endoplasmic Reticulum] => S000028739-G2[Endoplasmic Reticulum] + Glc[Endoplasmic Reticulum]	protein folding	Cwh41p
S000028739-G2[Endoplasmic Reticulum] => S000028739-G3[Endoplasmic Reticulum] + Glc[Endoplasmic Reticulum]	protein folding	Rot2p
S000028739-G3[Endoplasmic Reticulum] => S000028739-G4[Endoplasmic Reticulum] + Glc[Endoplasmic Reticulum]	protein folding	Rot2p
S000028739-G4[Endoplasmic Reticulum] => S000028739-G5[Endoplasmic Reticulum] + man[Endoplasmic Reticulum]	protein folding	Mns1p
S000028739-G5[Endoplasmic Reticulum] + 5 Kar2p[Endoplasmic Reticulum] + 5 ATP[Endoplasmic Reticulum] + 5 Scj1p[Endoplasmic Reticulum] + 5 Jem1p[Endoplasmic Reticulum] + 5 Sec63p[Endoplasmic Reticulum] => S000028739-G5-Kar2ATPcplx[Endoplasmic Reticulum]	protein folding	Kar2p;Scj1p;Jem1p;Sec63p
S000028739-G5-Kar2ATPcplx-[Endoplasmic Reticulum] => S000028739-F-G5-Kar2ADPcplx[Endoplasmic Reticulum] + 5 Scj1p[Endoplasmic Reticulum] + 5 Jem1p[Endoplasmic Reticulum] + 5 pi[Endoplasmic Reticulum] + Sec63p[Endoplasmic Reticulum]	protein folding
S000028739-F-G5-Kar2ADPcplx[Endoplasmic Reticulum] + 5 Sil1p[Endoplasmic Reticulum] + 5 Lhs1p[Endoplasmic Reticulum] + 5 ATP[Endoplasmic Reticulum] => S000028739-F-G5[Endoplasmic Reticulum] + 5 Sil1p[Endoplasmic Reticulum] + 5 Lhs1p[Endoplasmic Reticulum] + 5 ADP[Endoplasmic Reticulum] + 5 Kar2p[Endoplasmic Reticulum] protein folding	protein folding	Lhs1p;Sil1p
S000028739-7-G5[Endoplasmic Reticulum] + Sar1-GTP[Endoplasmic Reticulum] + Sec23-Sec24C[Cytoplasm] + Emp24p[Endoplasmic Reticulum] + Bet1p[Endoplasmic Reticulum] + Bos1p[Endoplasmic Reticulum] => S000028739-F-G7-COPII-pbud-cplx[Endoplasmic Reticulum]	COPII(for GPI-anchored cargo)	Sar1p;Sec23p;Sec24p;Bet1p;Bos1p;Emp24p
S000028739-F-G7orG5-COPII-pbud-cplx[Endoplasmic Reticulum] + Sec13-Sec31C[Cytoplasm] + Sec16p[Endoplasmic Reticulum] + Sed4p[Endoplasmic Reticulum] + Sec17p[Endoplasmic Reticulum] => S000028739-F-G5orG7-COPII[COPII]	COPII(common	Sec13p;Sec31p;Sec16p;Sed4p;Sec17p;Sec22p
S000028739-F-G7-COPII[COPII] + TRAPPIC[COPII] + Ypt1p[COPII] + GTP[COPII] => S000028739-F-G7[Golgi] + sar1-GDP[Cytoplasm] + pi[Cytoplasm] + Sec13-Sec31C[Cytoplasm] + Sec16p[Cytoplasm] + Sec23p[COPII] + Sec24p[COPII] + Emp24p[Endoplasmic Reticulum] + Bet3p[Cytoplasm] + Bet5p[Cytoplasm] + Trs20p[Cytoplasm] + Trs23p[Cytoplasm] + Trs31p[Cytoplasm] + Trs33p[Cytoplasm] + Bet1p[Endoplasmic Reticulum] + …	COPII(for GPI-anchored cargo)	Ypt1p;Uso1p;bug1p;Bet3p;Bet5p;Trs20p;Trs23p;Trs31p;Trs33p
S000028739-misf-G6[Cytoplasm] + 0.1 Ssm4p[Endoplasmic Reticulum] + 0.1 SSH1C[Endoplasmic Reticulum] + 0.1 AAAC[Cytoplasm] => S000028739-misf-G6-UBcplx[Cytoplasm]	ERADC	Sbh1p;Sss1p;Ssh1p;Ubx2p;Cdc48p;Ufd1p;Npl4p;Ssm4p
S000028739-misf-G6-UBcplx[Endoplasmic Reticulum] + 5 ATP[Cytoplasm] + 5 Ubiquitin[Cytoplasm] => S000028739-misf-G6-Ubiquitin[Cytoplasm] + 5 ADP[Cytoplasm] + 0.1 Ssm4p[Endoplasmic Reticulum] + 0.1 Sbh1p[Endoplasmic Reticulum] + 0.1 Sss1p[Endoplasmic Reticulum] + 0.1 Ssh1p[Endoplasmic Reticulum] + 0.1 Ubx2p[Endoplasmic Reticulum] + 0.1 Cdc48p[Cytoplasm] + 0.1 Ufd1p[Cytoplasm] + 0.1 Npl4p[Cytoplasm]…	ERADC	Ubiquitin
S000028739-misf-G6-Ubiquitin[Cytoplasm] + 0.1 Png1p[Cytoplasm] + 5 ATP[Cytoplasm] + 0.1 26sproteosome[Cytoplasm] + 5 H2O[Cytoplasm] => G6[Cytoplasm] + 5 Ubiquitin[Cytoplasm] + 5 ADP[Cytoplasm] + 5 pi[Cytoplasm] + 0.1 S000028739aa[Cytoplasm]	ERADC	Png1p; 26sproteosome
S000028739-G5orG7[Golgi] + GDP-man[Golgi] => S000028739-G9[Golgi] + GDP[Golgi]	Golgi processing	Och1p
S000028739-G9[Golgi] + 5 GDP-man[Golgi] => S000028739-G10[Golgi] + 5 GDP[Golgi]	Golgi processing	Mnn9p;Van1p
S000028739-G10[Golgi] + 40 GDP-man[Golgi] => S000028739-G11[Golgi] + 40 GDP[Golgi]	Golgi processing	Anp1p;Mnn9p;Mnn10p;Mnn11p;Hoc1p
S000028739-G15[Golgi] => S000028739-G16[Golgi] + aminoacid[Golgi]	Golgi processing	Kex1p;Kex2p;Ste13p
S000028739-M1[Golgi] + GTP[Cytoplasm] + clathrinC[Cytoplasm] + Arf1p[Cytoplasm] + EXOC[Cytoplasm] => S000028739-M1[cell membrane] + GDP[Golgi] + 2 Chc1p[Cytoplasm] + Clc1p[Cytoplasm] + Arf1p[Cytoplasm] + Sec3p[Cytoplasm] + Sec5p[Cytoplasm] + Sec6p[Cytoplasm] + Sec8p[Cytoplasm] + Sec10p[Cytoplasm] + Sec15p[Cytoplasm] + Exo70p[Cytoplasm] + Exo84p[Cytoplasm] + Sec4p[Cytoplasm]	LDSV(low density Secretory vesicle)	Arf1p;Sec3p;Sec5p;Sec6p;Sec8p;Sec10p;Sec15p;Exo70p;Exo84p;Sec4p;Chc1p;Clc1p
S000001257[Cytoplasm] + SRPC[Cytoplasm] => S000001257-SRPC[Cytoplasm]	translocation from cytosol to ER (SRP-dependent)	Srp14p;Srp21p;Srp54p;Sec65p;Srp68p;Srp72p
S000001257-SRPC[Cytoplasm] + SRC[Endoplasmic Reticulum] => S000001257-SRPC-SRC[Cytoplasm]	translocation from cytosol to ER (SRP-dependent)	Srp101p;Srp102p
S000001257-SRPC-SRC[Cytoplasm] + 2 GTP[Cytoplasm] + SEC61C[Endoplasmic Reticulum] => S000001257-SRPC-SRC-SEC61C[Cytoplasm]	translocation from cytosol to ER (SRP-dependent)	Sec61p;Sbh1p;Sss1p;Ssh1p
S000001257-SRPC-SRC-SEC61C[Cytoplasm] => S000001257-SEC61C[Cytoplasm] + Srp14p[Cytoplasm] + Srp21p[Cytoplasm] + Srp68p[Cytoplasm] + Sec65p[Cytoplasm] + Srp72p[Cytoplasm] + scR1[Cytoplasm] + Srp54p[Cytoplasm] + Srp51p[Cytoplasm] + Srp52p[Cytoplasm] + 2 GDP[Cytoplasm] + 2 pi[Cytoplasm]	translocation from cytosol to ER (SRP-dependent)
S000001257-SEC61C[Cytoplasm] + SPC[Endoplasmic Reticulum] => S000001257[Endoplasmic Reticulum] + Sec61p[Endoplasmic Reticulum] + Sbh1p[Endoplasmic Reticulum] + Sss1p[Endoplasmic Reticulum] + Sec11p[Endoplasmic Reticulum] + Spc1p[Endoplasmic Reticulum] + Spc2p[Endoplasmic Reticulum] + Spc3p[Endoplasmic Reticulum] + sp[Cytoplasm]	translocation from cytosol to ER (SRP-dependent)	Sec11p;Spc1p;Spc2p;Spc3p
S000001257-G5[Endoplasmic Reticulum] + 2 Acyl-PI-GlcN-(man)4-(EtNP)3[Endoplasmic Reticulum] => S000001257-G6[Endoplasmic Reticulum]	GPI biosynthesis	Gaa1p;Gpi8p;Gpi16p;Gpi17p;Gab1p
S000001257-G6[Endoplasmic Reticulum]=> S000001257-G6[Endoplasmic Reticulum] + ?acyl[Endoplasmic Reticulum]	GPI biosynthesis	Bst1p
S000001257-SEC61C[Endoplasmic Reticulum] + 2 Dol-pp-GlcNAc(2)man(9)-Glc(3)[Endoplasmic Reticulum] + OSTC[Endoplasmic Reticulum] => S000001257-G1-SEC61C[Endoplasmic Reticulum] + 2 Dol-ppEndoplasmic Reticulum] + Ost1p[Endoplasmic Reticulum] + Ost2p[Endoplasmic Reticulum] + St3p[Endoplasmic Reticulum] + Ost4p[Endoplasmic Reticulum] + Ost5p[Endoplasmic Reticulum] + Ost6p[Endoplasmic Reticulum] + Stt3…	ER N-glycosylation	Stt3p;Ost1p;Wbp1p;OSt3p;Ost6p;Swp1p;Ost2p;Ost5p;Ost4p
S000001257-G1-SEC61C[Endoplasmic Reticulum] => S000001257-G1[Endoplasmic Reticulum] + SEC61C[Endoplasmic Reticulum]	protein folding
S000001257-G1[Endoplasmic Reticulum] => S000001257-G2[Endoplasmic Reticulum] + Glc[Endoplasmic Reticulum]	protein folding	Cwh41p
S000001257-G2[Endoplasmic Reticulum] => S000001257-G3[Endoplasmic Reticulum] + Glc[Endoplasmic Reticulum]	protein folding	Rot2p
S000001257-G3[Endoplasmic Reticulum] => S000001257-G4[Endoplasmic Reticulum] + Glc[Endoplasmic Reticulum]	protein folding	Rot2p
S000001257-G4[Endoplasmic Reticulum] => S000001257-G5[Endoplasmic Reticulum] + man[Endoplasmic Reticulum]	protein folding	Mns1p
S000001257-G5[Endoplasmic Reticulum] + 5 Kar2p[Endoplasmic Reticulum] + 5 ATP[Endoplasmic Reticulum] + 5 Scj1p[Endoplasmic Reticulum] + 5 Jem1p[Endoplasmic Reticulum] + 5 Sec63p[Endoplasmic Reticulum] => S000001257-G5-Kar2ATPcplx[Endoplasmic Reticulum]	protein folding	Kar2p;Scj1p;Jem1p;Sec63p
S000001257-G5-Kar2ATPcplx-[Endoplasmic Reticulum] => S000001257-F-G5-Kar2ADPcplx[Endoplasmic Reticulum] + 5 Scj1p[Endoplasmic Reticulum] + 5 Jem1p[Endoplasmic Reticulum] + 5 pi[Endoplasmic Reticulum] + Sec63p[Endoplasmic Reticulum]	protein folding
S000001257-F-G5-Kar2ADPcplx[Endoplasmic Reticulum] + 5 Sil1p[Endoplasmic Reticulum] + 5 Lhs1p[Endoplasmic Reticulum] + 5 ATP[Endoplasmic Reticulum] => S000001257-F-G5[Endoplasmic Reticulum] + 5 Sil1p[Endoplasmic Reticulum] + 5 Lhs1p[Endoplasmic Reticulum] + 5 ADP[Endoplasmic Reticulum] + 5 Kar2p[Endoplasmic Reticulum] protein folding	protein folding	Lhs1p;Sil1p
S000001257-7-G5[Endoplasmic Reticulum] + Sar1-GTP[Endoplasmic Reticulum] + Sec23-Sec24C[Cytoplasm] + Emp24p[Endoplasmic Reticulum] + Bet1p[Endoplasmic Reticulum] + Bos1p[Endoplasmic Reticulum] => S000001257-F-G7-COPII-pbud-cplx[Endoplasmic Reticulum]	COPII(for GPI-anchored cargo)	Sar1p;Sec23p;Sec24p;Bet1p;Bos1p;Emp24p
S000001257-F-G7orG5-COPII-pbud-cplx[Endoplasmic Reticulum] + Sec13-Sec31C[Cytoplasm] + Sec16p[Endoplasmic Reticulum] + Sed4p[Endoplasmic Reticulum] + Sec17p[Endoplasmic Reticulum] => S000001257-F-G5orG7-COPII[COPII]	COPII(common	Sec13p;Sec31p;Sec16p;Sed4p;Sec17p;Sec22p
S000001257-F-G7-COPII[COPII] + TRAPPIC[COPII] + Ypt1p[COPII] + GTP[COPII] => S000001257-F-G7[Golgi] + sar1-GDP[Cytoplasm] + pi[Cytoplasm] + Sec13-Sec31C[Cytoplasm] + Sec16p[Cytoplasm] + Sec23p[COPII] + Sec24p[COPII] + Emp24p[Endoplasmic Reticulum] + Bet3p[Cytoplasm] + Bet5p[Cytoplasm] + Trs20p[Cytoplasm] + Trs23p[Cytoplasm] + Trs31p[Cytoplasm] + Trs33p[Cytoplasm] + Bet1p[Endoplasmic Reticulum] + …	COPII(for GPI-anchored cargo)	Ypt1p;Uso1p;bug1p;Bet3p;Bet5p;Trs20p;Trs23p;Trs31p;Trs33p
S000001257-misf-G6[Cytoplasm] + 0.1 Ssm4p[Endoplasmic Reticulum] + 0.1 SSH1C[Endoplasmic Reticulum] + 0.1 AAAC[Cytoplasm] => S000001257-misf-G6-UBcplx[Cytoplasm]	ERADC	Sbh1p;Sss1p;Ssh1p;Ubx2p;Cdc48p;Ufd1p;Npl4p;Ssm4p
S000001257-misf-G6-UBcplx[Endoplasmic Reticulum] + 5 ATP[Cytoplasm] + 5 Ubiquitin[Cytoplasm] => S000001257-misf-G6-Ubiquitin[Cytoplasm] + 5 ADP[Cytoplasm] + 0.1 Ssm4p[Endoplasmic Reticulum] + 0.1 Sbh1p[Endoplasmic Reticulum] + 0.1 Sss1p[Endoplasmic Reticulum] + 0.1 Ssh1p[Endoplasmic Reticulum] + 0.1 Ubx2p[Endoplasmic Reticulum] + 0.1 Cdc48p[Cytoplasm] + 0.1 Ufd1p[Cytoplasm] + 0.1 Npl4p[Cytoplasm]…	ERADC	Ubiquitin
S000001257-misf-G6-Ubiquitin[Cytoplasm] + 0.1 Png1p[Cytoplasm] + 5 ATP[Cytoplasm] + 0.1 26sproteosome[Cytoplasm] + 5 H2O[Cytoplasm] => G6[Cytoplasm] + 5 Ubiquitin[Cytoplasm] + 5 ADP[Cytoplasm] + 5 pi[Cytoplasm] + 0.1 S000001257aa[Cytoplasm]	ERADC	Png1p; 26sproteosome
S000001257-G5orG7[Golgi] + GDP-man[Golgi] => S000001257-G9[Golgi] + GDP[Golgi]	Golgi processing	Och1p
S000001257-G9[Golgi] + 5 GDP-man[Golgi] => S000001257-G10[Golgi] + 5 GDP[Golgi]	Golgi processing	Mnn9p;Van1p
S000001257-G10[Golgi] + 40 GDP-man[Golgi] => S000001257-G11[Golgi] + 40 GDP[Golgi]	Golgi processing	Anp1p;Mnn9p;Mnn10p;Mnn11p;Hoc1p
S000001257-G15[Golgi] => S000001257-G16[Golgi] + aminoacid[Golgi]	Golgi processing	Kex1p;Kex2p;Ste13p
S000001257-M1[Golgi] + GTP[Cytoplasm] + clathrinC[Cytoplasm] + Arf1p[Cytoplasm] + EXOC[Cytoplasm] => S000001257-M1[cell membrane] + GDP[Golgi] + 2 Chc1p[Cytoplasm] + Clc1p[Cytoplasm] + Arf1p[Cytoplasm] + Sec3p[Cytoplasm] + Sec5p[Cytoplasm] + Sec6p[Cytoplasm] + Sec8p[Cytoplasm] + Sec10p[Cytoplasm] + Sec15p[Cytoplasm] + Exo70p[Cytoplasm] + Exo84p[Cytoplasm] + Sec4p[Cytoplasm]	LDSV(low density Secretory vesicle)	Arf1p;Sec3p;Sec5p;Sec6p;Sec8p;Sec10p;Sec15p;Exo70p;Exo84p;Sec4p;Chc1p;Clc1p
S000003707[Cytoplasm] + SRPC[Cytoplasm] => S000003707-SRPC[Cytoplasm]	translocation from cytosol to ER (SRP-dependent)	Srp14p;Srp21p;Srp54p;Sec65p;Srp68p;Srp72p
S000003707-SRPC[Cytoplasm] + SRC[Endoplasmic Reticulum] => S000003707-SRPC-SRC[Cytoplasm]	translocation from cytosol to ER (SRP-dependent)	Srp101p;Srp102p
S000003707-SRPC-SRC[Cytoplasm] + 2 GTP[Cytoplasm] + SEC61C[Endoplasmic Reticulum] => S000003707-SRPC-SRC-SEC61C[Cytoplasm]	translocation from cytosol to ER (SRP-dependent)	Sec61p;Sbh1p;Sss1p;Ssh1p
S000003707-SRPC-SRC-SEC61C[Cytoplasm] => S000003707-SEC61C[Cytoplasm] + Srp14p[Cytoplasm] + Srp21p[Cytoplasm] + Srp68p[Cytoplasm] + Sec65p[Cytoplasm] + Srp72p[Cytoplasm] + scR1[Cytoplasm] + Srp54p[Cytoplasm] + Srp51p[Cytoplasm] + Srp52p[Cytoplasm] + 2 GDP[Cytoplasm] + 2 pi[Cytoplasm]	translocation from cytosol to ER (SRP-dependent)
S000003707-SEC61C[Cytoplasm] + SPC[Endoplasmic Reticulum] => S000003707[Endoplasmic Reticulum] + Sec61p[Endoplasmic Reticulum] + Sbh1p[Endoplasmic Reticulum] + Sss1p[Endoplasmic Reticulum] + Sec11p[Endoplasmic Reticulum] + Spc1p[Endoplasmic Reticulum] + Spc2p[Endoplasmic Reticulum] + Spc3p[Endoplasmic Reticulum] + sp[Cytoplasm]	translocation from cytosol to ER (SRP-dependent)	Sec11p;Spc1p;Spc2p;Spc3p
S000003707-G5[Endoplasmic Reticulum] + 1 Acyl-PI-GlcN-(man)4-(EtNP)3[Endoplasmic Reticulum] => S000003707-G6[Endoplasmic Reticulum]	GPI biosynthesis	Gaa1p;Gpi8p;Gpi16p;Gpi17p;Gab1p
S000003707-G6[Endoplasmic Reticulum]=> S000003707-G6[Endoplasmic Reticulum] + ?acyl[Endoplasmic Reticulum]	GPI biosynthesis	Bst1p
S000003707-SEC61C[Endoplasmic Reticulum] + 11 Dol-pp-GlcNAc(2)man(9)-Glc(3)[Endoplasmic Reticulum] + OSTC[Endoplasmic Reticulum] => S000003707-G1-SEC61C[Endoplasmic Reticulum] + 11 Dol-ppEndoplasmic Reticulum] + Ost1p[Endoplasmic Reticulum] + Ost2p[Endoplasmic Reticulum] + St3p[Endoplasmic Reticulum] + Ost4p[Endoplasmic Reticulum] + Ost5p[Endoplasmic Reticulum] + Ost6p[Endoplasmic Reticulum] + St…	ER N-glycosylation	Stt3p;Ost1p;Wbp1p;OSt3p;Ost6p;Swp1p;Ost2p;Ost5p;Ost4p
S000003707-G1-SEC61C[Endoplasmic Reticulum] => S000003707-G1[Endoplasmic Reticulum] + SEC61C[Endoplasmic Reticulum]	protein folding
S000003707-G1[Endoplasmic Reticulum] => S000003707-G2[Endoplasmic Reticulum] + Glc[Endoplasmic Reticulum]	protein folding	Cwh41p
S000003707-G2[Endoplasmic Reticulum] => S000003707-G3[Endoplasmic Reticulum] + Glc[Endoplasmic Reticulum]	protein folding	Rot2p
S000003707-G3[Endoplasmic Reticulum] => S000003707-G4[Endoplasmic Reticulum] + Glc[Endoplasmic Reticulum]	protein folding	Rot2p
S000003707-G4[Endoplasmic Reticulum] => S000003707-G5[Endoplasmic Reticulum] + man[Endoplasmic Reticulum]	protein folding	Mns1p
S000003707-G5[Endoplasmic Reticulum] + 5 Kar2p[Endoplasmic Reticulum] + 5 ATP[Endoplasmic Reticulum] + 5 Scj1p[Endoplasmic Reticulum] + 5 Jem1p[Endoplasmic Reticulum] + 5 Sec63p[Endoplasmic Reticulum] => S000003707-G5-Kar2ATPcplx[Endoplasmic Reticulum]	protein folding	Kar2p;Scj1p;Jem1p;Sec63p
S000003707-G5-Kar2ATPcplx-[Endoplasmic Reticulum] => S000003707-F-G5-Kar2ADPcplx[Endoplasmic Reticulum] + 5 Scj1p[Endoplasmic Reticulum] + 5 Jem1p[Endoplasmic Reticulum] + 5 pi[Endoplasmic Reticulum] + Sec63p[Endoplasmic Reticulum]	protein folding
S000003707-F-G5-Kar2ADPcplx[Endoplasmic Reticulum] + 5 Sil1p[Endoplasmic Reticulum] + 5 Lhs1p[Endoplasmic Reticulum] + 5 ATP[Endoplasmic Reticulum] => S000003707-F-G5[Endoplasmic Reticulum] + 5 Sil1p[Endoplasmic Reticulum] + 5 Lhs1p[Endoplasmic Reticulum] + 5 ADP[Endoplasmic Reticulum] + 5 Kar2p[Endoplasmic Reticulum] protein folding	protein folding	Lhs1p;Sil1p
S000003707-7-G5[Endoplasmic Reticulum] + Sar1-GTP[Endoplasmic Reticulum] + Sec23-Sec24C[Cytoplasm] + Emp24p[Endoplasmic Reticulum] + Bet1p[Endoplasmic Reticulum] + Bos1p[Endoplasmic Reticulum] => S000003707-F-G7-COPII-pbud-cplx[Endoplasmic Reticulum]	COPII(for GPI-anchored cargo)	Sar1p;Sec23p;Sec24p;Bet1p;Bos1p;Emp24p
S000003707-F-G7orG5-COPII-pbud-cplx[Endoplasmic Reticulum] + Sec13-Sec31C[Cytoplasm] + Sec16p[Endoplasmic Reticulum] + Sed4p[Endoplasmic Reticulum] + Sec17p[Endoplasmic Reticulum] => S000003707-F-G5orG7-COPII[COPII]	COPII(common	Sec13p;Sec31p;Sec16p;Sed4p;Sec17p;Sec22p
S000003707-F-G7-COPII[COPII] + TRAPPIC[COPII] + Ypt1p[COPII] + GTP[COPII] => S000003707-F-G7[Golgi] + sar1-GDP[Cytoplasm] + pi[Cytoplasm] + Sec13-Sec31C[Cytoplasm] + Sec16p[Cytoplasm] + Sec23p[COPII] + Sec24p[COPII] + Emp24p[Endoplasmic Reticulum] + Bet3p[Cytoplasm] + Bet5p[Cytoplasm] + Trs20p[Cytoplasm] + Trs23p[Cytoplasm] + Trs31p[Cytoplasm] + Trs33p[Cytoplasm] + Bet1p[Endoplasmic Reticulum] + …	COPII(for GPI-anchored cargo)	Ypt1p;Uso1p;bug1p;Bet3p;Bet5p;Trs20p;Trs23p;Trs31p;Trs33p
S000003707-misf-G6[Cytoplasm] + 0.1 Ssm4p[Endoplasmic Reticulum] + 0.1 SSH1C[Endoplasmic Reticulum] + 0.1 AAAC[Cytoplasm] => S000003707-misf-G6-UBcplx[Cytoplasm]	ERADC	Sbh1p;Sss1p;Ssh1p;Ubx2p;Cdc48p;Ufd1p;Npl4p;Ssm4p
S000003707-misf-G6-UBcplx[Endoplasmic Reticulum] + 5 ATP[Cytoplasm] + 5 Ubiquitin[Cytoplasm] => S000003707-misf-G6-Ubiquitin[Cytoplasm] + 5 ADP[Cytoplasm] + 0.1 Ssm4p[Endoplasmic Reticulum] + 0.1 Sbh1p[Endoplasmic Reticulum] + 0.1 Sss1p[Endoplasmic Reticulum] + 0.1 Ssh1p[Endoplasmic Reticulum] + 0.1 Ubx2p[Endoplasmic Reticulum] + 0.1 Cdc48p[Cytoplasm] + 0.1 Ufd1p[Cytoplasm] + 0.1 Npl4p[Cytoplasm]…	ERADC	Ubiquitin
S000003707-misf-G6-Ubiquitin[Cytoplasm] + 0.1 Png1p[Cytoplasm] + 5 ATP[Cytoplasm] + 0.1 26sproteosome[Cytoplasm] + 5 H2O[Cytoplasm] => G6[Cytoplasm] + 5 Ubiquitin[Cytoplasm] + 5 ADP[Cytoplasm] + 5 pi[Cytoplasm] + 0.1 S000003707aa[Cytoplasm]	ERADC	Png1p; 26sproteosome
S000003707-G5orG7[Golgi] + GDP-man[Golgi] => S000003707-G9[Golgi] + GDP[Golgi]	Golgi processing	Och1p
S000003707-G9[Golgi] + 5 GDP-man[Golgi] => S000003707-G10[Golgi] + 5 GDP[Golgi]	Golgi processing	Mnn9p;Van1p
S000003707-G10[Golgi] + 40 GDP-man[Golgi] => S000003707-G11[Golgi] + 40 GDP[Golgi]	Golgi processing	Anp1p;Mnn9p;Mnn10p;Mnn11p;Hoc1p
S000003707-G15[Golgi] => S000003707-G16[Golgi] + aminoacid[Golgi]	Golgi processing	Kex1p;Kex2p;Ste13p
S000003707-M1[Golgi] + GTP[Cytoplasm] + clathrinC[Cytoplasm] + Arf1p[Cytoplasm] + EXOC[Cytoplasm] => S000003707-M1[cell membrane] + GDP[Golgi] + 2 Chc1p[Cytoplasm] + Clc1p[Cytoplasm] + Arf1p[Cytoplasm] + Sec3p[Cytoplasm] + Sec5p[Cytoplasm] + Sec6p[Cytoplasm] + Sec8p[Cytoplasm] + Sec10p[Cytoplasm] + Sec15p[Cytoplasm] + Exo70p[Cytoplasm] + Exo84p[Cytoplasm] + Sec4p[Cytoplasm]	LDSV(low density Secretory vesicle)	Arf1p;Sec3p;Sec5p;Sec6p;Sec8p;Sec10p;Sec15p;Exo70p;Exo84p;Sec4p;Chc1p;Clc1p
S000001478[Cytoplasm] + SRPC[Cytoplasm] => S000001478-SRPC[Cytoplasm]	translocation from cytosol to ER (SRP-dependent)	Srp14p;Srp21p;Srp54p;Sec65p;Srp68p;Srp72p
S000001478-SRPC[Cytoplasm] + SRC[Endoplasmic Reticulum] => S000001478-SRPC-SRC[Cytoplasm]	translocation from cytosol to ER (SRP-dependent)	Srp101p;Srp102p
S000001478-SRPC-SRC[Cytoplasm] + 2 GTP[Cytoplasm] + SEC61C[Endoplasmic Reticulum] => S000001478-SRPC-SRC-SEC61C[Cytoplasm]	translocation from cytosol to ER (SRP-dependent)	Sec61p;Sbh1p;Sss1p;Ssh1p
S000001478-SRPC-SRC-SEC61C[Cytoplasm] => S000001478-SEC61C[Cytoplasm] + Srp14p[Cytoplasm] + Srp21p[Cytoplasm] + Srp68p[Cytoplasm] + Sec65p[Cytoplasm] + Srp72p[Cytoplasm] + scR1[Cytoplasm] + Srp54p[Cytoplasm] + Srp51p[Cytoplasm] + Srp52p[Cytoplasm] + 2 GDP[Cytoplasm] + 2 pi[Cytoplasm]	translocation from cytosol to ER (SRP-dependent)
S000001478-SEC61C[Cytoplasm] + SPC[Endoplasmic Reticulum] => S000001478[Endoplasmic Reticulum] + Sec61p[Endoplasmic Reticulum] + Sbh1p[Endoplasmic Reticulum] + Sss1p[Endoplasmic Reticulum] + Sec11p[Endoplasmic Reticulum] + Spc1p[Endoplasmic Reticulum] + Spc2p[Endoplasmic Reticulum] + Spc3p[Endoplasmic Reticulum] + sp[Cytoplasm]	translocation from cytosol to ER (SRP-dependent)	Sec11p;Spc1p;Spc2p;Spc3p
S000001478-G5[Endoplasmic Reticulum] + 1 Acyl-PI-GlcN-(man)4-(EtNP)3[Endoplasmic Reticulum] => S000001478-G6[Endoplasmic Reticulum]	GPI biosynthesis	Gaa1p;Gpi8p;Gpi16p;Gpi17p;Gab1p
S000001478-G6[Endoplasmic Reticulum]=> S000001478-G6[Endoplasmic Reticulum] + ?acyl[Endoplasmic Reticulum]	GPI biosynthesis	Bst1p
S000001478-SEC61C[Endoplasmic Reticulum] + 11 Dol-pp-GlcNAc(2)man(9)-Glc(3)[Endoplasmic Reticulum] + OSTC[Endoplasmic Reticulum] => S000001478-G1-SEC61C[Endoplasmic Reticulum] + 11 Dol-ppEndoplasmic Reticulum] + Ost1p[Endoplasmic Reticulum] + Ost2p[Endoplasmic Reticulum] + St3p[Endoplasmic Reticulum] + Ost4p[Endoplasmic Reticulum] + Ost5p[Endoplasmic Reticulum] + Ost6p[Endoplasmic Reticulum] + St…	ER N-glycosylation	Stt3p;Ost1p;Wbp1p;OSt3p;Ost6p;Swp1p;Ost2p;Ost5p;Ost4p
S000001478-G1-SEC61C[Endoplasmic Reticulum] => S000001478-G1[Endoplasmic Reticulum] + SEC61C[Endoplasmic Reticulum]	protein folding
S000001478-G1[Endoplasmic Reticulum] => S000001478-G2[Endoplasmic Reticulum] + Glc[Endoplasmic Reticulum]	protein folding	Cwh41p
S000001478-G2[Endoplasmic Reticulum] => S000001478-G3[Endoplasmic Reticulum] + Glc[Endoplasmic Reticulum]	protein folding	Rot2p
S000001478-G3[Endoplasmic Reticulum] => S000001478-G4[Endoplasmic Reticulum] + Glc[Endoplasmic Reticulum]	protein folding	Rot2p
S000001478-G4[Endoplasmic Reticulum] => S000001478-G5[Endoplasmic Reticulum] + man[Endoplasmic Reticulum]	protein folding	Mns1p
S000001478-G5[Endoplasmic Reticulum] + 5 Kar2p[Endoplasmic Reticulum] + 5 ATP[Endoplasmic Reticulum] + 5 Scj1p[Endoplasmic Reticulum] + 5 Jem1p[Endoplasmic Reticulum] + 5 Sec63p[Endoplasmic Reticulum] => S000001478-G5-Kar2ATPcplx[Endoplasmic Reticulum]	protein folding	Kar2p;Scj1p;Jem1p;Sec63p
S000001478-G5-Kar2ATPcplx-[Endoplasmic Reticulum] => S000001478-F-G5-Kar2ADPcplx[Endoplasmic Reticulum] + 5 Scj1p[Endoplasmic Reticulum] + 5 Jem1p[Endoplasmic Reticulum] + 5 pi[Endoplasmic Reticulum] + Sec63p[Endoplasmic Reticulum]	protein folding
S000001478-F-G5-Kar2ADPcplx[Endoplasmic Reticulum] + 5 Sil1p[Endoplasmic Reticulum] + 5 Lhs1p[Endoplasmic Reticulum] + 5 ATP[Endoplasmic Reticulum] => S000001478-F-G5[Endoplasmic Reticulum] + 5 Sil1p[Endoplasmic Reticulum] + 5 Lhs1p[Endoplasmic Reticulum] + 5 ADP[Endoplasmic Reticulum] + 5 Kar2p[Endoplasmic Reticulum] protein folding	protein folding	Lhs1p;Sil1p
S000001478-7-G5[Endoplasmic Reticulum] + Sar1-GTP[Endoplasmic Reticulum] + Sec23-Sec24C[Cytoplasm] + Emp24p[Endoplasmic Reticulum] + Bet1p[Endoplasmic Reticulum] + Bos1p[Endoplasmic Reticulum] => S000001478-F-G7-COPII-pbud-cplx[Endoplasmic Reticulum]	COPII(for GPI-anchored cargo)	Sar1p;Sec23p;Sec24p;Bet1p;Bos1p;Emp24p
S000001478-F-G7orG5-COPII-pbud-cplx[Endoplasmic Reticulum] + Sec13-Sec31C[Cytoplasm] + Sec16p[Endoplasmic Reticulum] + Sed4p[Endoplasmic Reticulum] + Sec17p[Endoplasmic Reticulum] => S000001478-F-G5orG7-COPII[COPII]	COPII(common	Sec13p;Sec31p;Sec16p;Sed4p;Sec17p;Sec22p
S000001478-F-G7-COPII[COPII] + TRAPPIC[COPII] + Ypt1p[COPII] + GTP[COPII] => S000001478-F-G7[Golgi] + sar1-GDP[Cytoplasm] + pi[Cytoplasm] + Sec13-Sec31C[Cytoplasm] + Sec16p[Cytoplasm] + Sec23p[COPII] + Sec24p[COPII] + Emp24p[Endoplasmic Reticulum] + Bet3p[Cytoplasm] + Bet5p[Cytoplasm] + Trs20p[Cytoplasm] + Trs23p[Cytoplasm] + Trs31p[Cytoplasm] + Trs33p[Cytoplasm] + Bet1p[Endoplasmic Reticulum] + …	COPII(for GPI-anchored cargo)	Ypt1p;Uso1p;bug1p;Bet3p;Bet5p;Trs20p;Trs23p;Trs31p;Trs33p
S000001478-misf-G6[Cytoplasm] + 0.1 Ssm4p[Endoplasmic Reticulum] + 0.1 SSH1C[Endoplasmic Reticulum] + 0.1 AAAC[Cytoplasm] => S000001478-misf-G6-UBcplx[Cytoplasm]	ERADC	Sbh1p;Sss1p;Ssh1p;Ubx2p;Cdc48p;Ufd1p;Npl4p;Ssm4p
S000001478-misf-G6-UBcplx[Endoplasmic Reticulum] + 5 ATP[Cytoplasm] + 5 Ubiquitin[Cytoplasm] => S000001478-misf-G6-Ubiquitin[Cytoplasm] + 5 ADP[Cytoplasm] + 0.1 Ssm4p[Endoplasmic Reticulum] + 0.1 Sbh1p[Endoplasmic Reticulum] + 0.1 Sss1p[Endoplasmic Reticulum] + 0.1 Ssh1p[Endoplasmic Reticulum] + 0.1 Ubx2p[Endoplasmic Reticulum] + 0.1 Cdc48p[Cytoplasm] + 0.1 Ufd1p[Cytoplasm] + 0.1 Npl4p[Cytoplasm]…	ERADC	Ubiquitin
S000001478-misf-G6-Ubiquitin[Cytoplasm] + 0.1 Png1p[Cytoplasm] + 5 ATP[Cytoplasm] + 0.1 26sproteosome[Cytoplasm] + 5 H2O[Cytoplasm] => G6[Cytoplasm] + 5 Ubiquitin[Cytoplasm] + 5 ADP[Cytoplasm] + 5 pi[Cytoplasm] + 0.1 S000001478aa[Cytoplasm]	ERADC	Png1p; 26sproteosome
S000001478-G5orG7[Golgi] + GDP-man[Golgi] => S000001478-G9[Golgi] + GDP[Golgi]	Golgi processing	Och1p
S000001478-G9[Golgi] + 5 GDP-man[Golgi] => S000001478-G10[Golgi] + 5 GDP[Golgi]	Golgi processing	Mnn9p;Van1p
S000001478-G10[Golgi] + 40 GDP-man[Golgi] => S000001478-G11[Golgi] + 40 GDP[Golgi]	Golgi processing	Anp1p;Mnn9p;Mnn10p;Mnn11p;Hoc1p
S000001478-G15[Golgi] => S000001478-G16[Golgi] + aminoacid[Golgi]	Golgi processing	Kex1p;Kex2p;Ste13p
S000001478-M1[Golgi] + GTP[Cytoplasm] + clathrinC[Cytoplasm] + Arf1p[Cytoplasm] + EXOC[Cytoplasm] => S000001478-M1[cell membrane] + GDP[Golgi] + 2 Chc1p[Cytoplasm] + Clc1p[Cytoplasm] + Arf1p[Cytoplasm] + Sec3p[Cytoplasm] + Sec5p[Cytoplasm] + Sec6p[Cytoplasm] + Sec8p[Cytoplasm] + Sec10p[Cytoplasm] + Sec15p[Cytoplasm] + Exo70p[Cytoplasm] + Exo84p[Cytoplasm] + Sec4p[Cytoplasm]	LDSV(low density Secretory vesicle)	Arf1p;Sec3p;Sec5p;Sec6p;Sec8p;Sec10p;Sec15p;Exo70p;Exo84p;Sec4p;Chc1p;Clc1p
S000004335[Cytoplasm] + SRPC[Cytoplasm] => S000004335-SRPC[Cytoplasm]	translocation from cytosol to ER (SRP-dependent)	Srp14p;Srp21p;Srp54p;Sec65p;Srp68p;Srp72p
S000004335-SRPC[Cytoplasm] + SRC[Endoplasmic Reticulum] => S000004335-SRPC-SRC[Cytoplasm]	translocation from cytosol to ER (SRP-dependent)	Srp101p;Srp102p
S000004335-SRPC-SRC[Cytoplasm] + 2 GTP[Cytoplasm] + SEC61C[Endoplasmic Reticulum] => S000004335-SRPC-SRC-SEC61C[Cytoplasm]	translocation from cytosol to ER (SRP-dependent)	Sec61p;Sbh1p;Sss1p;Ssh1p
S000004335-SRPC-SRC-SEC61C[Cytoplasm] => S000004335-SEC61C[Cytoplasm] + Srp14p[Cytoplasm] + Srp21p[Cytoplasm] + Srp68p[Cytoplasm] + Sec65p[Cytoplasm] + Srp72p[Cytoplasm] + scR1[Cytoplasm] + Srp54p[Cytoplasm] + Srp51p[Cytoplasm] + Srp52p[Cytoplasm] + 2 GDP[Cytoplasm] + 2 pi[Cytoplasm]	translocation from cytosol to ER (SRP-dependent)
S000004335-SEC61C[Cytoplasm] + SPC[Endoplasmic Reticulum] => S000004335[Endoplasmic Reticulum] + Sec61p[Endoplasmic Reticulum] + Sbh1p[Endoplasmic Reticulum] + Sss1p[Endoplasmic Reticulum] + Sec11p[Endoplasmic Reticulum] + Spc1p[Endoplasmic Reticulum] + Spc2p[Endoplasmic Reticulum] + Spc3p[Endoplasmic Reticulum] + sp[Cytoplasm]	translocation from cytosol to ER (SRP-dependent)	Sec11p;Spc1p;Spc2p;Spc3p
S000004335-G5[Endoplasmic Reticulum] + 1 Acyl-PI-GlcN-(man)4-(EtNP)3[Endoplasmic Reticulum] => S000004335-G6[Endoplasmic Reticulum]	GPI biosynthesis	Gaa1p;Gpi8p;Gpi16p;Gpi17p;Gab1p
S000004335-G6[Endoplasmic Reticulum]=> S000004335-G6[Endoplasmic Reticulum] + ?acyl[Endoplasmic Reticulum]	GPI biosynthesis	Bst1p
S000004335-SEC61C[Endoplasmic Reticulum] + 1 Dol-pp-GlcNAc(2)man(9)-Glc(3)[Endoplasmic Reticulum] + OSTC[Endoplasmic Reticulum] => S000004335-G1-SEC61C[Endoplasmic Reticulum] + 1 Dol-ppEndoplasmic Reticulum] + Ost1p[Endoplasmic Reticulum] + Ost2p[Endoplasmic Reticulum] + St3p[Endoplasmic Reticulum] + Ost4p[Endoplasmic Reticulum] + Ost5p[Endoplasmic Reticulum] + Ost6p[Endoplasmic Reticulum] + Stt3…	ER N-glycosylation	Stt3p;Ost1p;Wbp1p;OSt3p;Ost6p;Swp1p;Ost2p;Ost5p;Ost4p
S000004335-G1-SEC61C[Endoplasmic Reticulum] => S000004335-G1[Endoplasmic Reticulum] + SEC61C[Endoplasmic Reticulum]	protein folding
S000004335-G1[Endoplasmic Reticulum] => S000004335-G2[Endoplasmic Reticulum] + Glc[Endoplasmic Reticulum]	protein folding	Cwh41p
S000004335-G2[Endoplasmic Reticulum] => S000004335-G3[Endoplasmic Reticulum] + Glc[Endoplasmic Reticulum]	protein folding	Rot2p
S000004335-G3[Endoplasmic Reticulum] => S000004335-G4[Endoplasmic Reticulum] + Glc[Endoplasmic Reticulum]	protein folding	Rot2p
S000004335-G4[Endoplasmic Reticulum] => S000004335-G5[Endoplasmic Reticulum] + man[Endoplasmic Reticulum]	protein folding	Mns1p
S000004335-G5[Endoplasmic Reticulum] + 5 Kar2p[Endoplasmic Reticulum] + 5 ATP[Endoplasmic Reticulum] + 5 Scj1p[Endoplasmic Reticulum] + 5 Jem1p[Endoplasmic Reticulum] + 5 Sec63p[Endoplasmic Reticulum] => S000004335-G5-Kar2ATPcplx[Endoplasmic Reticulum]	protein folding	Kar2p;Scj1p;Jem1p;Sec63p
S000004335-G5-Kar2ATPcplx[Endoplasmic Reticulum] + Pdi1p[Endoplasmic Reticulum] + Ero1p[Endoplasmic Reticulum] + ?O2[Endoplasmic Reticulum] + 7 FADH[Endoplasmic Reticulum] + Erv2p[Endoplasmic Reticulum] => S000004335-S-G5-Kar2ATPcplx[Endoplasmic Reticulum] + ?H2O[Endoplasmic Reticulum] + 7 FAD[Endoplasmic Reticulum]	protein folding	Pdi1p;Ero1p;Erv2p;Kar2p
S000004335-S-G5-Kar2ATPcplx-[Endoplasmic Reticulum] => S000004335-F-G5-Kar2ADPcplx[Endoplasmic Reticulum] + 5 Scj1p[Endoplasmic Reticulum] + 5 Jem1p[Endoplasmic Reticulum] + 5 pi[Endoplasmic Reticulum] + Sec63p[Endoplasmic Reticulum] + Pdi1p[Endoplasmic Reticulum] + Ero1p[Endoplasmic Reticulum] + Erv2p[Endoplasmic Reticulum]	protein folding	Scj1p;Jem1p;Sec63p
S000004335-F-G5-Kar2ADPcplx[Endoplasmic Reticulum] + 5 Sil1p[Endoplasmic Reticulum] + 5 Lhs1p[Endoplasmic Reticulum] + 5 ATP[Endoplasmic Reticulum] => S000004335-F-G5[Endoplasmic Reticulum] + 5 Sil1p[Endoplasmic Reticulum] + 5 Lhs1p[Endoplasmic Reticulum] + 5 ADP[Endoplasmic Reticulum] + 5 Kar2p[Endoplasmic Reticulum] protein folding	protein folding	Lhs1p;Sil1p
S000004335-7-G5[Endoplasmic Reticulum] + Sar1-GTP[Endoplasmic Reticulum] + Sec23-Sec24C[Cytoplasm] + Emp24p[Endoplasmic Reticulum] + Bet1p[Endoplasmic Reticulum] + Bos1p[Endoplasmic Reticulum] => S000004335-F-G7-COPII-pbud-cplx[Endoplasmic Reticulum]	COPII(for GPI-anchored cargo)	Sar1p;Sec23p;Sec24p;Bet1p;Bos1p;Emp24p
S000004335-F-G7orG5-COPII-pbud-cplx[Endoplasmic Reticulum] + Sec13-Sec31C[Cytoplasm] + Sec16p[Endoplasmic Reticulum] + Sed4p[Endoplasmic Reticulum] + Sec17p[Endoplasmic Reticulum] => S000004335-F-G5orG7-COPII[COPII]	COPII(common	Sec13p;Sec31p;Sec16p;Sed4p;Sec17p;Sec22p
S000004335-F-G7-COPII[COPII] + TRAPPIC[COPII] + Ypt1p[COPII] + GTP[COPII] => S000004335-F-G7[Golgi] + sar1-GDP[Cytoplasm] + pi[Cytoplasm] + Sec13-Sec31C[Cytoplasm] + Sec16p[Cytoplasm] + Sec23p[COPII] + Sec24p[COPII] + Emp24p[Endoplasmic Reticulum] + Bet3p[Cytoplasm] + Bet5p[Cytoplasm] + Trs20p[Cytoplasm] + Trs23p[Cytoplasm] + Trs31p[Cytoplasm] + Trs33p[Cytoplasm] + Bet1p[Endoplasmic Reticulum] + …	COPII(for GPI-anchored cargo)	Ypt1p;Uso1p;bug1p;Bet3p;Bet5p;Trs20p;Trs23p;Trs31p;Trs33p
S000004335-misf-G6[Cytoplasm] + 0.1 Ssm4p[Endoplasmic Reticulum] + 0.1 SSH1C[Endoplasmic Reticulum] + 0.1 AAAC[Cytoplasm] => S000004335-misf-G6-UBcplx[Cytoplasm]	ERADC	Sbh1p;Sss1p;Ssh1p;Ubx2p;Cdc48p;Ufd1p;Npl4p;Ssm4p
S000004335-misf-G6-UBcplx[Endoplasmic Reticulum] + 5 ATP[Cytoplasm] + 5 Ubiquitin[Cytoplasm] => S000004335-misf-G6-Ubiquitin[Cytoplasm] + 5 ADP[Cytoplasm] + 0.1 Ssm4p[Endoplasmic Reticulum] + 0.1 Sbh1p[Endoplasmic Reticulum] + 0.1 Sss1p[Endoplasmic Reticulum] + 0.1 Ssh1p[Endoplasmic Reticulum] + 0.1 Ubx2p[Endoplasmic Reticulum] + 0.1 Cdc48p[Cytoplasm] + 0.1 Ufd1p[Cytoplasm] + 0.1 Npl4p[Cytoplasm]…	ERADC	Ubiquitin
S000004335-misf-G6-Ubiquitin[Cytoplasm] + 0.1 Png1p[Cytoplasm] + 5 ATP[Cytoplasm] + 0.1 26sproteosome[Cytoplasm] + 5 H2O[Cytoplasm] => G6[Cytoplasm] + 5 Ubiquitin[Cytoplasm] + 5 ADP[Cytoplasm] + 5 pi[Cytoplasm] + 0.1 S000004335aa[Cytoplasm]	ERADC	Png1p; 26sproteosome
S000004335-G5orG7[Golgi] + GDP-man[Golgi] => S000004335-G9[Golgi] + GDP[Golgi]	Golgi processing	Och1p
S000004335-G9[Golgi] + 5 GDP-man[Golgi] => S000004335-G10[Golgi] + 5 GDP[Golgi]	Golgi processing	Mnn9p;Van1p
S000004335-G10[Golgi] + 40 GDP-man[Golgi] => S000004335-G11[Golgi] + 40 GDP[Golgi]	Golgi processing	Anp1p;Mnn9p;Mnn10p;Mnn11p;Hoc1p
S000004335-G15[Golgi] => S000004335-G16[Golgi] + aminoacid[Golgi]	Golgi processing	Kex1p;Kex2p;Ste13p
S000004335-M1[Golgi] + GTP[Cytoplasm] + clathrinC[Cytoplasm] + Arf1p[Cytoplasm] + EXOC[Cytoplasm] => S000004335-M1[cell membrane] + GDP[Golgi] + 2 Chc1p[Cytoplasm] + Clc1p[Cytoplasm] + Arf1p[Cytoplasm] + Sec3p[Cytoplasm] + Sec5p[Cytoplasm] + Sec6p[Cytoplasm] + Sec8p[Cytoplasm] + Sec10p[Cytoplasm] + Sec15p[Cytoplasm] + Exo70p[Cytoplasm] + Exo84p[Cytoplasm] + Sec4p[Cytoplasm]	LDSV(low density Secretory vesicle)	Arf1p;Sec3p;Sec5p;Sec6p;Sec8p;Sec10p;Sec15p;Exo70p;Exo84p;Sec4p;Chc1p;Clc1p
S000001529[Cytoplasm] + SRPC[Cytoplasm] => S000001529-SRPC[Cytoplasm]	translocation from cytosol to ER (SRP-dependent)	Srp14p;Srp21p;Srp54p;Sec65p;Srp68p;Srp72p
S000001529-SRPC[Cytoplasm] + SRC[Endoplasmic Reticulum] => S000001529-SRPC-SRC[Cytoplasm]	translocation from cytosol to ER (SRP-dependent)	Srp101p;Srp102p
S000001529-SRPC-SRC[Cytoplasm] + 2 GTP[Cytoplasm] + SEC61C[Endoplasmic Reticulum] => S000001529-SRPC-SRC-SEC61C[Cytoplasm]	translocation from cytosol to ER (SRP-dependent)	Sec61p;Sbh1p;Sss1p;Ssh1p
S000001529-SRPC-SRC-SEC61C[Cytoplasm] => S000001529-SEC61C[Cytoplasm] + Srp14p[Cytoplasm] + Srp21p[Cytoplasm] + Srp68p[Cytoplasm] + Sec65p[Cytoplasm] + Srp72p[Cytoplasm] + scR1[Cytoplasm] + Srp54p[Cytoplasm] + Srp51p[Cytoplasm] + Srp52p[Cytoplasm] + 2 GDP[Cytoplasm] + 2 pi[Cytoplasm]	translocation from cytosol to ER (SRP-dependent)
S000001529-SEC61C[Cytoplasm] + SPC[Endoplasmic Reticulum] => S000001529[Endoplasmic Reticulum] + Sec61p[Endoplasmic Reticulum] + Sbh1p[Endoplasmic Reticulum] + Sss1p[Endoplasmic Reticulum] + Sec11p[Endoplasmic Reticulum] + Spc1p[Endoplasmic Reticulum] + Spc2p[Endoplasmic Reticulum] + Spc3p[Endoplasmic Reticulum] + sp[Cytoplasm]	translocation from cytosol to ER (SRP-dependent)	Sec11p;Spc1p;Spc2p;Spc3p
S000001529-G5[Endoplasmic Reticulum] + 1 Acyl-PI-GlcN-(man)4-(EtNP)3[Endoplasmic Reticulum] => S000001529-G6[Endoplasmic Reticulum]	GPI biosynthesis	Gaa1p;Gpi8p;Gpi16p;Gpi17p;Gab1p
S000001529-G6[Endoplasmic Reticulum]=> S000001529-G6[Endoplasmic Reticulum] + ?acyl[Endoplasmic Reticulum]	GPI biosynthesis	Bst1p
S000001529-SEC61C[Endoplasmic Reticulum] + 12 Dol-pp-GlcNAc(2)man(9)-Glc(3)[Endoplasmic Reticulum] + OSTC[Endoplasmic Reticulum] => S000001529-G1-SEC61C[Endoplasmic Reticulum] + 12 Dol-ppEndoplasmic Reticulum] + Ost1p[Endoplasmic Reticulum] + Ost2p[Endoplasmic Reticulum] + St3p[Endoplasmic Reticulum] + Ost4p[Endoplasmic Reticulum] + Ost5p[Endoplasmic Reticulum] + Ost6p[Endoplasmic Reticulum] + St…	ER N-glycosylation	Stt3p;Ost1p;Wbp1p;OSt3p;Ost6p;Swp1p;Ost2p;Ost5p;Ost4p
S000001529-G1-SEC61C[Endoplasmic Reticulum] => S000001529-G1[Endoplasmic Reticulum] + SEC61C[Endoplasmic Reticulum]	protein folding
S000001529-G1[Endoplasmic Reticulum] => S000001529-G2[Endoplasmic Reticulum] + Glc[Endoplasmic Reticulum]	protein folding	Cwh41p
S000001529-G2[Endoplasmic Reticulum] => S000001529-G3[Endoplasmic Reticulum] + Glc[Endoplasmic Reticulum]	protein folding	Rot2p
S000001529-G3[Endoplasmic Reticulum] => S000001529-G4[Endoplasmic Reticulum] + Glc[Endoplasmic Reticulum]	protein folding	Rot2p
S000001529-G4[Endoplasmic Reticulum] => S000001529-G5[Endoplasmic Reticulum] + man[Endoplasmic Reticulum]	protein folding	Mns1p
S000001529-G5[Endoplasmic Reticulum] + 5 Kar2p[Endoplasmic Reticulum] + 5 ATP[Endoplasmic Reticulum] + 5 Scj1p[Endoplasmic Reticulum] + 5 Jem1p[Endoplasmic Reticulum] + 5 Sec63p[Endoplasmic Reticulum] => S000001529-G5-Kar2ATPcplx[Endoplasmic Reticulum]	protein folding	Kar2p;Scj1p;Jem1p;Sec63p
S000001529-G5-Kar2ATPcplx-[Endoplasmic Reticulum] => S000001529-F-G5-Kar2ADPcplx[Endoplasmic Reticulum] + 5 Scj1p[Endoplasmic Reticulum] + 5 Jem1p[Endoplasmic Reticulum] + 5 pi[Endoplasmic Reticulum] + Sec63p[Endoplasmic Reticulum]	protein folding
S000001529-F-G5-Kar2ADPcplx[Endoplasmic Reticulum] + 5 Sil1p[Endoplasmic Reticulum] + 5 Lhs1p[Endoplasmic Reticulum] + 5 ATP[Endoplasmic Reticulum] => S000001529-F-G5[Endoplasmic Reticulum] + 5 Sil1p[Endoplasmic Reticulum] + 5 Lhs1p[Endoplasmic Reticulum] + 5 ADP[Endoplasmic Reticulum] + 5 Kar2p[Endoplasmic Reticulum] protein folding	protein folding	Lhs1p;Sil1p
S000001529-7-G5[Endoplasmic Reticulum] + Sar1-GTP[Endoplasmic Reticulum] + Sec23-Sec24C[Cytoplasm] + Emp24p[Endoplasmic Reticulum] + Bet1p[Endoplasmic Reticulum] + Bos1p[Endoplasmic Reticulum] => S000001529-F-G7-COPII-pbud-cplx[Endoplasmic Reticulum]	COPII(for GPI-anchored cargo)	Sar1p;Sec23p;Sec24p;Bet1p;Bos1p;Emp24p
S000001529-F-G7orG5-COPII-pbud-cplx[Endoplasmic Reticulum] + Sec13-Sec31C[Cytoplasm] + Sec16p[Endoplasmic Reticulum] + Sed4p[Endoplasmic Reticulum] + Sec17p[Endoplasmic Reticulum] => S000001529-F-G5orG7-COPII[COPII]	COPII(common	Sec13p;Sec31p;Sec16p;Sed4p;Sec17p;Sec22p
S000001529-F-G7-COPII[COPII] + TRAPPIC[COPII] + Ypt1p[COPII] + GTP[COPII] => S000001529-F-G7[Golgi] + sar1-GDP[Cytoplasm] + pi[Cytoplasm] + Sec13-Sec31C[Cytoplasm] + Sec16p[Cytoplasm] + Sec23p[COPII] + Sec24p[COPII] + Emp24p[Endoplasmic Reticulum] + Bet3p[Cytoplasm] + Bet5p[Cytoplasm] + Trs20p[Cytoplasm] + Trs23p[Cytoplasm] + Trs31p[Cytoplasm] + Trs33p[Cytoplasm] + Bet1p[Endoplasmic Reticulum] + …	COPII(for GPI-anchored cargo)	Ypt1p;Uso1p;bug1p;Bet3p;Bet5p;Trs20p;Trs23p;Trs31p;Trs33p
S000001529-misf-G6[Cytoplasm] + 0.1 Ssm4p[Endoplasmic Reticulum] + 0.1 SSH1C[Endoplasmic Reticulum] + 0.1 AAAC[Cytoplasm] => S000001529-misf-G6-UBcplx[Cytoplasm]	ERADC	Sbh1p;Sss1p;Ssh1p;Ubx2p;Cdc48p;Ufd1p;Npl4p;Ssm4p
S000001529-misf-G6-UBcplx[Endoplasmic Reticulum] + 5 ATP[Cytoplasm] + 5 Ubiquitin[Cytoplasm] => S000001529-misf-G6-Ubiquitin[Cytoplasm] + 5 ADP[Cytoplasm] + 0.1 Ssm4p[Endoplasmic Reticulum] + 0.1 Sbh1p[Endoplasmic Reticulum] + 0.1 Sss1p[Endoplasmic Reticulum] + 0.1 Ssh1p[Endoplasmic Reticulum] + 0.1 Ubx2p[Endoplasmic Reticulum] + 0.1 Cdc48p[Cytoplasm] + 0.1 Ufd1p[Cytoplasm] + 0.1 Npl4p[Cytoplasm]…	ERADC	Ubiquitin
S000001529-misf-G6-Ubiquitin[Cytoplasm] + 0.1 Png1p[Cytoplasm] + 5 ATP[Cytoplasm] + 0.1 26sproteosome[Cytoplasm] + 5 H2O[Cytoplasm] => G6[Cytoplasm] + 5 Ubiquitin[Cytoplasm] + 5 ADP[Cytoplasm] + 5 pi[Cytoplasm] + 0.1 S000001529aa[Cytoplasm]	ERADC	Png1p; 26sproteosome
S000001529-G5orG7[Golgi] + GDP-man[Golgi] => S000001529-G9[Golgi] + GDP[Golgi]	Golgi processing	Och1p
S000001529-G9[Golgi] + 5 GDP-man[Golgi] => S000001529-G10[Golgi] + 5 GDP[Golgi]	Golgi processing	Mnn9p;Van1p
S000001529-G10[Golgi] + 40 GDP-man[Golgi] => S000001529-G11[Golgi] + 40 GDP[Golgi]	Golgi processing	Anp1p;Mnn9p;Mnn10p;Mnn11p;Hoc1p
S000001529-G15[Golgi] => S000001529-G16[Golgi] + aminoacid[Golgi]	Golgi processing	Kex1p;Kex2p;Ste13p
S000001529-M1[Golgi] + GTP[Cytoplasm] + clathrinC[Cytoplasm] + Arf1p[Cytoplasm] + EXOC[Cytoplasm] => S000001529-M1[cell membrane] + GDP[Golgi] + 2 Chc1p[Cytoplasm] + Clc1p[Cytoplasm] + Arf1p[Cytoplasm] + Sec3p[Cytoplasm] + Sec5p[Cytoplasm] + Sec6p[Cytoplasm] + Sec8p[Cytoplasm] + Sec10p[Cytoplasm] + Sec15p[Cytoplasm] + Exo70p[Cytoplasm] + Exo84p[Cytoplasm] + Sec4p[Cytoplasm]	LDSV(low density Secretory vesicle)	Arf1p;Sec3p;Sec5p;Sec6p;Sec8p;Sec10p;Sec15p;Exo70p;Exo84p;Sec4p;Chc1p;Clc1p
S000004851[Cytoplasm] + SRPC[Cytoplasm] => S000004851-SRPC[Cytoplasm]	translocation from cytosol to ER (SRP-dependent)	Srp14p;Srp21p;Srp54p;Sec65p;Srp68p;Srp72p
S000004851-SRPC[Cytoplasm] + SRC[Endoplasmic Reticulum] => S000004851-SRPC-SRC[Cytoplasm]	translocation from cytosol to ER (SRP-dependent)	Srp101p;Srp102p
S000004851-SRPC-SRC[Cytoplasm] + 2 GTP[Cytoplasm] + SEC61C[Endoplasmic Reticulum] => S000004851-SRPC-SRC-SEC61C[Cytoplasm]	translocation from cytosol to ER (SRP-dependent)	Sec61p;Sbh1p;Sss1p;Ssh1p
S000004851-SRPC-SRC-SEC61C[Cytoplasm] => S000004851-SEC61C[Cytoplasm] + Srp14p[Cytoplasm] + Srp21p[Cytoplasm] + Srp68p[Cytoplasm] + Sec65p[Cytoplasm] + Srp72p[Cytoplasm] + scR1[Cytoplasm] + Srp54p[Cytoplasm] + Srp51p[Cytoplasm] + Srp52p[Cytoplasm] + 2 GDP[Cytoplasm] + 2 pi[Cytoplasm]	translocation from cytosol to ER (SRP-dependent)
S000004851-SEC61C[Cytoplasm] + SPC[Endoplasmic Reticulum] => S000004851[Endoplasmic Reticulum] + Sec61p[Endoplasmic Reticulum] + Sbh1p[Endoplasmic Reticulum] + Sss1p[Endoplasmic Reticulum] + Sec11p[Endoplasmic Reticulum] + Spc1p[Endoplasmic Reticulum] + Spc2p[Endoplasmic Reticulum] + Spc3p[Endoplasmic Reticulum] + sp[Cytoplasm]	translocation from cytosol to ER (SRP-dependent)	Sec11p;Spc1p;Spc2p;Spc3p
S000004851-G5[Endoplasmic Reticulum] + 1 Acyl-PI-GlcN-(man)4-(EtNP)3[Endoplasmic Reticulum] => S000004851-G6[Endoplasmic Reticulum]	GPI biosynthesis	Gaa1p;Gpi8p;Gpi16p;Gpi17p;Gab1p
S000004851-G6[Endoplasmic Reticulum]=> S000004851-G6[Endoplasmic Reticulum] + ?acyl[Endoplasmic Reticulum]	GPI biosynthesis	Bst1p
S000004851-SEC61C[Endoplasmic Reticulum] + 9 Dol-pp-GlcNAc(2)man(9)-Glc(3)[Endoplasmic Reticulum] + OSTC[Endoplasmic Reticulum] => S000004851-G1-SEC61C[Endoplasmic Reticulum] + 9 Dol-ppEndoplasmic Reticulum] + Ost1p[Endoplasmic Reticulum] + Ost2p[Endoplasmic Reticulum] + St3p[Endoplasmic Reticulum] + Ost4p[Endoplasmic Reticulum] + Ost5p[Endoplasmic Reticulum] + Ost6p[Endoplasmic Reticulum] + Stt3…	ER N-glycosylation	Stt3p;Ost1p;Wbp1p;OSt3p;Ost6p;Swp1p;Ost2p;Ost5p;Ost4p
S000004851-G1-SEC61C[Endoplasmic Reticulum] => S000004851-G1[Endoplasmic Reticulum] + SEC61C[Endoplasmic Reticulum]	protein folding
S000004851-G1[Endoplasmic Reticulum] => S000004851-G2[Endoplasmic Reticulum] + Glc[Endoplasmic Reticulum]	protein folding	Cwh41p
S000004851-G2[Endoplasmic Reticulum] => S000004851-G3[Endoplasmic Reticulum] + Glc[Endoplasmic Reticulum]	protein folding	Rot2p
S000004851-G3[Endoplasmic Reticulum] => S000004851-G4[Endoplasmic Reticulum] + Glc[Endoplasmic Reticulum]	protein folding	Rot2p
S000004851-G4[Endoplasmic Reticulum] => S000004851-G5[Endoplasmic Reticulum] + man[Endoplasmic Reticulum]	protein folding	Mns1p
S000004851-G5[Endoplasmic Reticulum] + 5 Kar2p[Endoplasmic Reticulum] + 5 ATP[Endoplasmic Reticulum] + 5 Scj1p[Endoplasmic Reticulum] + 5 Jem1p[Endoplasmic Reticulum] + 5 Sec63p[Endoplasmic Reticulum] => S000004851-G5-Kar2ATPcplx[Endoplasmic Reticulum]	protein folding	Kar2p;Scj1p;Jem1p;Sec63p
S000004851-G5-Kar2ATPcplx-[Endoplasmic Reticulum] => S000004851-F-G5-Kar2ADPcplx[Endoplasmic Reticulum] + 5 Scj1p[Endoplasmic Reticulum] + 5 Jem1p[Endoplasmic Reticulum] + 5 pi[Endoplasmic Reticulum] + Sec63p[Endoplasmic Reticulum]	protein folding
S000004851-F-G5-Kar2ADPcplx[Endoplasmic Reticulum] + 5 Sil1p[Endoplasmic Reticulum] + 5 Lhs1p[Endoplasmic Reticulum] + 5 ATP[Endoplasmic Reticulum] => S000004851-F-G5[Endoplasmic Reticulum] + 5 Sil1p[Endoplasmic Reticulum] + 5 Lhs1p[Endoplasmic Reticulum] + 5 ADP[Endoplasmic Reticulum] + 5 Kar2p[Endoplasmic Reticulum] protein folding	protein folding	Lhs1p;Sil1p
S000004851-7-G5[Endoplasmic Reticulum] + Sar1-GTP[Endoplasmic Reticulum] + Sec23-Sec24C[Cytoplasm] + Emp24p[Endoplasmic Reticulum] + Bet1p[Endoplasmic Reticulum] + Bos1p[Endoplasmic Reticulum] => S000004851-F-G7-COPII-pbud-cplx[Endoplasmic Reticulum]	COPII(for GPI-anchored cargo)	Sar1p;Sec23p;Sec24p;Bet1p;Bos1p;Emp24p
S000004851-F-G7orG5-COPII-pbud-cplx[Endoplasmic Reticulum] + Sec13-Sec31C[Cytoplasm] + Sec16p[Endoplasmic Reticulum] + Sed4p[Endoplasmic Reticulum] + Sec17p[Endoplasmic Reticulum] => S000004851-F-G5orG7-COPII[COPII]	COPII(common	Sec13p;Sec31p;Sec16p;Sed4p;Sec17p;Sec22p
S000004851-F-G7-COPII[COPII] + TRAPPIC[COPII] + Ypt1p[COPII] + GTP[COPII] => S000004851-F-G7[Golgi] + sar1-GDP[Cytoplasm] + pi[Cytoplasm] + Sec13-Sec31C[Cytoplasm] + Sec16p[Cytoplasm] + Sec23p[COPII] + Sec24p[COPII] + Emp24p[Endoplasmic Reticulum] + Bet3p[Cytoplasm] + Bet5p[Cytoplasm] + Trs20p[Cytoplasm] + Trs23p[Cytoplasm] + Trs31p[Cytoplasm] + Trs33p[Cytoplasm] + Bet1p[Endoplasmic Reticulum] + …	COPII(for GPI-anchored cargo)	Ypt1p;Uso1p;bug1p;Bet3p;Bet5p;Trs20p;Trs23p;Trs31p;Trs33p
S000004851-misf-G6[Cytoplasm] + 0.1 Ssm4p[Endoplasmic Reticulum] + 0.1 SSH1C[Endoplasmic Reticulum] + 0.1 AAAC[Cytoplasm] => S000004851-misf-G6-UBcplx[Cytoplasm]	ERADC	Sbh1p;Sss1p;Ssh1p;Ubx2p;Cdc48p;Ufd1p;Npl4p;Ssm4p
S000004851-misf-G6-UBcplx[Endoplasmic Reticulum] + 5 ATP[Cytoplasm] + 5 Ubiquitin[Cytoplasm] => S000004851-misf-G6-Ubiquitin[Cytoplasm] + 5 ADP[Cytoplasm] + 0.1 Ssm4p[Endoplasmic Reticulum] + 0.1 Sbh1p[Endoplasmic Reticulum] + 0.1 Sss1p[Endoplasmic Reticulum] + 0.1 Ssh1p[Endoplasmic Reticulum] + 0.1 Ubx2p[Endoplasmic Reticulum] + 0.1 Cdc48p[Cytoplasm] + 0.1 Ufd1p[Cytoplasm] + 0.1 Npl4p[Cytoplasm]…	ERADC	Ubiquitin
S000004851-misf-G6-Ubiquitin[Cytoplasm] + 0.1 Png1p[Cytoplasm] + 5 ATP[Cytoplasm] + 0.1 26sproteosome[Cytoplasm] + 5 H2O[Cytoplasm] => G6[Cytoplasm] + 5 Ubiquitin[Cytoplasm] + 5 ADP[Cytoplasm] + 5 pi[Cytoplasm] + 0.1 S000004851aa[Cytoplasm]	ERADC	Png1p; 26sproteosome
S000004851-G5orG7[Golgi] + GDP-man[Golgi] => S000004851-G9[Golgi] + GDP[Golgi]	Golgi processing	Och1p
S000004851-G9[Golgi] + 5 GDP-man[Golgi] => S000004851-G10[Golgi] + 5 GDP[Golgi]	Golgi processing	Mnn9p;Van1p
S000004851-G10[Golgi] + 40 GDP-man[Golgi] => S000004851-G11[Golgi] + 40 GDP[Golgi]	Golgi processing	Anp1p;Mnn9p;Mnn10p;Mnn11p;Hoc1p
S000004851-G15[Golgi] => S000004851-G16[Golgi] + aminoacid[Golgi]	Golgi processing	Kex1p;Kex2p;Ste13p
S000004851-M1[Golgi] + GTP[Cytoplasm] + clathrinC[Cytoplasm] + Arf1p[Cytoplasm] + EXOC[Cytoplasm] => S000004851-M1[cell membrane] + GDP[Golgi] + 2 Chc1p[Cytoplasm] + Clc1p[Cytoplasm] + Arf1p[Cytoplasm] + Sec3p[Cytoplasm] + Sec5p[Cytoplasm] + Sec6p[Cytoplasm] + Sec8p[Cytoplasm] + Sec10p[Cytoplasm] + Sec15p[Cytoplasm] + Exo70p[Cytoplasm] + Exo84p[Cytoplasm] + Sec4p[Cytoplasm]	LDSV(low density Secretory vesicle)	Arf1p;Sec3p;Sec5p;Sec6p;Sec8p;Sec10p;Sec15p;Exo70p;Exo84p;Sec4p;Chc1p;Clc1p
S000000282[Cytoplasm] + SRPC[Cytoplasm] => S000000282-SRPC[Cytoplasm]	translocation from cytosol to ER (SRP-dependent)	Srp14p;Srp21p;Srp54p;Sec65p;Srp68p;Srp72p
S000000282-SRPC[Cytoplasm] + SRC[Endoplasmic Reticulum] => S000000282-SRPC-SRC[Cytoplasm]	translocation from cytosol to ER (SRP-dependent)	Srp101p;Srp102p
S000000282-SRPC-SRC[Cytoplasm] + 2 GTP[Cytoplasm] + SEC61C[Endoplasmic Reticulum] => S000000282-SRPC-SRC-SEC61C[Cytoplasm]	translocation from cytosol to ER (SRP-dependent)	Sec61p;Sbh1p;Sss1p;Ssh1p
S000000282-SRPC-SRC-SEC61C[Cytoplasm] => S000000282-SEC61C[Cytoplasm] + Srp14p[Cytoplasm] + Srp21p[Cytoplasm] + Srp68p[Cytoplasm] + Sec65p[Cytoplasm] + Srp72p[Cytoplasm] + scR1[Cytoplasm] + Srp54p[Cytoplasm] + Srp51p[Cytoplasm] + Srp52p[Cytoplasm] + 2 GDP[Cytoplasm] + 2 pi[Cytoplasm]	translocation from cytosol to ER (SRP-dependent)
S000000282-SEC61C[Cytoplasm] + SPC[Endoplasmic Reticulum] => S000000282[Endoplasmic Reticulum] + Sec61p[Endoplasmic Reticulum] + Sbh1p[Endoplasmic Reticulum] + Sss1p[Endoplasmic Reticulum] + Sec11p[Endoplasmic Reticulum] + Spc1p[Endoplasmic Reticulum] + Spc2p[Endoplasmic Reticulum] + Spc3p[Endoplasmic Reticulum] + sp[Cytoplasm]	translocation from cytosol to ER (SRP-dependent)	Sec11p;Spc1p;Spc2p;Spc3p
S000000282-G5[Endoplasmic Reticulum] + 1 Acyl-PI-GlcN-(man)4-(EtNP)3[Endoplasmic Reticulum] => S000000282-G6[Endoplasmic Reticulum]	GPI biosynthesis	Gaa1p;Gpi8p;Gpi16p;Gpi17p;Gab1p
S000000282-G6[Endoplasmic Reticulum]=> S000000282-G6[Endoplasmic Reticulum] + ?acyl[Endoplasmic Reticulum]	GPI biosynthesis	Bst1p
S000000282-SEC61C[Endoplasmic Reticulum] + 13 Dol-pp-GlcNAc(2)man(9)-Glc(3)[Endoplasmic Reticulum] + OSTC[Endoplasmic Reticulum] => S000000282-G1-SEC61C[Endoplasmic Reticulum] + 13 Dol-ppEndoplasmic Reticulum] + Ost1p[Endoplasmic Reticulum] + Ost2p[Endoplasmic Reticulum] + St3p[Endoplasmic Reticulum] + Ost4p[Endoplasmic Reticulum] + Ost5p[Endoplasmic Reticulum] + Ost6p[Endoplasmic Reticulum] + St…	ER N-glycosylation	Stt3p;Ost1p;Wbp1p;OSt3p;Ost6p;Swp1p;Ost2p;Ost5p;Ost4p
S000000282-G1-SEC61C[Endoplasmic Reticulum] => S000000282-G1[Endoplasmic Reticulum] + SEC61C[Endoplasmic Reticulum]	protein folding
S000000282-G1[Endoplasmic Reticulum] => S000000282-G2[Endoplasmic Reticulum] + Glc[Endoplasmic Reticulum]	protein folding	Cwh41p
S000000282-G2[Endoplasmic Reticulum] => S000000282-G3[Endoplasmic Reticulum] + Glc[Endoplasmic Reticulum]	protein folding	Rot2p
S000000282-G3[Endoplasmic Reticulum] => S000000282-G4[Endoplasmic Reticulum] + Glc[Endoplasmic Reticulum]	protein folding	Rot2p
S000000282-G4[Endoplasmic Reticulum] => S000000282-G5[Endoplasmic Reticulum] + man[Endoplasmic Reticulum]	protein folding	Mns1p
S000000282-G5[Endoplasmic Reticulum] + 5 Kar2p[Endoplasmic Reticulum] + 5 ATP[Endoplasmic Reticulum] + 5 Scj1p[Endoplasmic Reticulum] + 5 Jem1p[Endoplasmic Reticulum] + 5 Sec63p[Endoplasmic Reticulum] => S000000282-G5-Kar2ATPcplx[Endoplasmic Reticulum]	protein folding	Kar2p;Scj1p;Jem1p;Sec63p
S000000282-G5-Kar2ATPcplx-[Endoplasmic Reticulum] => S000000282-F-G5-Kar2ADPcplx[Endoplasmic Reticulum] + 5 Scj1p[Endoplasmic Reticulum] + 5 Jem1p[Endoplasmic Reticulum] + 5 pi[Endoplasmic Reticulum] + Sec63p[Endoplasmic Reticulum]	protein folding
S000000282-F-G5-Kar2ADPcplx[Endoplasmic Reticulum] + 5 Sil1p[Endoplasmic Reticulum] + 5 Lhs1p[Endoplasmic Reticulum] + 5 ATP[Endoplasmic Reticulum] => S000000282-F-G5[Endoplasmic Reticulum] + 5 Sil1p[Endoplasmic Reticulum] + 5 Lhs1p[Endoplasmic Reticulum] + 5 ADP[Endoplasmic Reticulum] + 5 Kar2p[Endoplasmic Reticulum] protein folding	protein folding	Lhs1p;Sil1p
S000000282-7-G5[Endoplasmic Reticulum] + Sar1-GTP[Endoplasmic Reticulum] + Sec23-Sec24C[Cytoplasm] + Emp24p[Endoplasmic Reticulum] + Bet1p[Endoplasmic Reticulum] + Bos1p[Endoplasmic Reticulum] => S000000282-F-G7-COPII-pbud-cplx[Endoplasmic Reticulum]	COPII(for GPI-anchored cargo)	Sar1p;Sec23p;Sec24p;Bet1p;Bos1p;Emp24p
S000000282-F-G7orG5-COPII-pbud-cplx[Endoplasmic Reticulum] + Sec13-Sec31C[Cytoplasm] + Sec16p[Endoplasmic Reticulum] + Sed4p[Endoplasmic Reticulum] + Sec17p[Endoplasmic Reticulum] => S000000282-F-G5orG7-COPII[COPII]	COPII(common	Sec13p;Sec31p;Sec16p;Sed4p;Sec17p;Sec22p
S000000282-F-G7-COPII[COPII] + TRAPPIC[COPII] + Ypt1p[COPII] + GTP[COPII] => S000000282-F-G7[Golgi] + sar1-GDP[Cytoplasm] + pi[Cytoplasm] + Sec13-Sec31C[Cytoplasm] + Sec16p[Cytoplasm] + Sec23p[COPII] + Sec24p[COPII] + Emp24p[Endoplasmic Reticulum] + Bet3p[Cytoplasm] + Bet5p[Cytoplasm] + Trs20p[Cytoplasm] + Trs23p[Cytoplasm] + Trs31p[Cytoplasm] + Trs33p[Cytoplasm] + Bet1p[Endoplasmic Reticulum] + …	COPII(for GPI-anchored cargo)	Ypt1p;Uso1p;bug1p;Bet3p;Bet5p;Trs20p;Trs23p;Trs31p;Trs33p
S000000282-misf-G6[Cytoplasm] + 0.1 Ssm4p[Endoplasmic Reticulum] + 0.1 SSH1C[Endoplasmic Reticulum] + 0.1 AAAC[Cytoplasm] => S000000282-misf-G6-UBcplx[Cytoplasm]	ERADC	Sbh1p;Sss1p;Ssh1p;Ubx2p;Cdc48p;Ufd1p;Npl4p;Ssm4p
S000000282-misf-G6-UBcplx[Endoplasmic Reticulum] + 5 ATP[Cytoplasm] + 5 Ubiquitin[Cytoplasm] => S000000282-misf-G6-Ubiquitin[Cytoplasm] + 5 ADP[Cytoplasm] + 0.1 Ssm4p[Endoplasmic Reticulum] + 0.1 Sbh1p[Endoplasmic Reticulum] + 0.1 Sss1p[Endoplasmic Reticulum] + 0.1 Ssh1p[Endoplasmic Reticulum] + 0.1 Ubx2p[Endoplasmic Reticulum] + 0.1 Cdc48p[Cytoplasm] + 0.1 Ufd1p[Cytoplasm] + 0.1 Npl4p[Cytoplasm]…	ERADC	Ubiquitin
S000000282-misf-G6-Ubiquitin[Cytoplasm] + 0.1 Png1p[Cytoplasm] + 5 ATP[Cytoplasm] + 0.1 26sproteosome[Cytoplasm] + 5 H2O[Cytoplasm] => G6[Cytoplasm] + 5 Ubiquitin[Cytoplasm] + 5 ADP[Cytoplasm] + 5 pi[Cytoplasm] + 0.1 S000000282aa[Cytoplasm]	ERADC	Png1p; 26sproteosome
S000000282-G5orG7[Golgi] + GDP-man[Golgi] => S000000282-G9[Golgi] + GDP[Golgi]	Golgi processing	Och1p
S000000282-G9[Golgi] + 5 GDP-man[Golgi] => S000000282-G10[Golgi] + 5 GDP[Golgi]	Golgi processing	Mnn9p;Van1p
S000000282-G10[Golgi] + 40 GDP-man[Golgi] => S000000282-G11[Golgi] + 40 GDP[Golgi]	Golgi processing	Anp1p;Mnn9p;Mnn10p;Mnn11p;Hoc1p
S000000282-G15[Golgi] => S000000282-G16[Golgi] + aminoacid[Golgi]	Golgi processing	Kex1p;Kex2p;Ste13p
S000000282-M1[Golgi] + GTP[Cytoplasm] + clathrinC[Cytoplasm] + Arf1p[Cytoplasm] + EXOC[Cytoplasm] => S000000282-M1[cell membrane] + GDP[Golgi] + 2 Chc1p[Cytoplasm] + Clc1p[Cytoplasm] + Arf1p[Cytoplasm] + Sec3p[Cytoplasm] + Sec5p[Cytoplasm] + Sec6p[Cytoplasm] + Sec8p[Cytoplasm] + Sec10p[Cytoplasm] + Sec15p[Cytoplasm] + Exo70p[Cytoplasm] + Exo84p[Cytoplasm] + Sec4p[Cytoplasm]	LDSV(low density Secretory vesicle)	Arf1p;Sec3p;Sec5p;Sec6p;Sec8p;Sec10p;Sec15p;Exo70p;Exo84p;Sec4p;Chc1p;Clc1p
S000000084[Cytoplasm] + SRPC[Cytoplasm] => S000000084-SRPC[Cytoplasm]	translocation from cytosol to ER (SRP-dependent)	Srp14p;Srp21p;Srp54p;Sec65p;Srp68p;Srp72p
S000000084-SRPC[Cytoplasm] + SRC[Endoplasmic Reticulum] => S000000084-SRPC-SRC[Cytoplasm]	translocation from cytosol to ER (SRP-dependent)	Srp101p;Srp102p
S000000084-SRPC-SRC[Cytoplasm] + 2 GTP[Cytoplasm] + SEC61C[Endoplasmic Reticulum] => S000000084-SRPC-SRC-SEC61C[Cytoplasm]	translocation from cytosol to ER (SRP-dependent)	Sec61p;Sbh1p;Sss1p;Ssh1p
S000000084-SRPC-SRC-SEC61C[Cytoplasm] => S000000084-SEC61C[Cytoplasm] + Srp14p[Cytoplasm] + Srp21p[Cytoplasm] + Srp68p[Cytoplasm] + Sec65p[Cytoplasm] + Srp72p[Cytoplasm] + scR1[Cytoplasm] + Srp54p[Cytoplasm] + Srp51p[Cytoplasm] + Srp52p[Cytoplasm] + 2 GDP[Cytoplasm] + 2 pi[Cytoplasm]	translocation from cytosol to ER (SRP-dependent)
S000000084-SEC61C[Cytoplasm] + SPC[Endoplasmic Reticulum] => S000000084[Endoplasmic Reticulum] + Sec61p[Endoplasmic Reticulum] + Sbh1p[Endoplasmic Reticulum] + Sss1p[Endoplasmic Reticulum] + Sec11p[Endoplasmic Reticulum] + Spc1p[Endoplasmic Reticulum] + Spc2p[Endoplasmic Reticulum] + Spc3p[Endoplasmic Reticulum] + sp[Cytoplasm]	translocation from cytosol to ER (SRP-dependent)	Sec11p;Spc1p;Spc2p;Spc3p
S000000084-G5[Endoplasmic Reticulum] + 1 Acyl-PI-GlcN-(man)4-(EtNP)3[Endoplasmic Reticulum] => S000000084-G6[Endoplasmic Reticulum]	GPI biosynthesis	Gaa1p;Gpi8p;Gpi16p;Gpi17p;Gab1p
S000000084-G6[Endoplasmic Reticulum]=> S000000084-G6[Endoplasmic Reticulum] + ?acyl[Endoplasmic Reticulum]	GPI biosynthesis	Bst1p
S000000084-SEC61C[Endoplasmic Reticulum] + 14 Dol-pp-GlcNAc(2)man(9)-Glc(3)[Endoplasmic Reticulum] + OSTC[Endoplasmic Reticulum] => S000000084-G1-SEC61C[Endoplasmic Reticulum] + 14 Dol-ppEndoplasmic Reticulum] + Ost1p[Endoplasmic Reticulum] + Ost2p[Endoplasmic Reticulum] + St3p[Endoplasmic Reticulum] + Ost4p[Endoplasmic Reticulum] + Ost5p[Endoplasmic Reticulum] + Ost6p[Endoplasmic Reticulum] + St…	ER N-glycosylation	Stt3p;Ost1p;Wbp1p;OSt3p;Ost6p;Swp1p;Ost2p;Ost5p;Ost4p
S000000084-G1-SEC61C[Endoplasmic Reticulum] => S000000084-G1[Endoplasmic Reticulum] + SEC61C[Endoplasmic Reticulum]	protein folding
S000000084-G1[Endoplasmic Reticulum] => S000000084-G2[Endoplasmic Reticulum] + Glc[Endoplasmic Reticulum]	protein folding	Cwh41p
S000000084-G2[Endoplasmic Reticulum] => S000000084-G3[Endoplasmic Reticulum] + Glc[Endoplasmic Reticulum]	protein folding	Rot2p
S000000084-G3[Endoplasmic Reticulum] => S000000084-G4[Endoplasmic Reticulum] + Glc[Endoplasmic Reticulum]	protein folding	Rot2p
S000000084-G4[Endoplasmic Reticulum] => S000000084-G5[Endoplasmic Reticulum] + man[Endoplasmic Reticulum]	protein folding	Mns1p
S000000084-G5[Endoplasmic Reticulum] + 5 Kar2p[Endoplasmic Reticulum] + 5 ATP[Endoplasmic Reticulum] + 5 Scj1p[Endoplasmic Reticulum] + 5 Jem1p[Endoplasmic Reticulum] + 5 Sec63p[Endoplasmic Reticulum] => S000000084-G5-Kar2ATPcplx[Endoplasmic Reticulum]	protein folding	Kar2p;Scj1p;Jem1p;Sec63p
S000000084-G5-Kar2ATPcplx-[Endoplasmic Reticulum] => S000000084-F-G5-Kar2ADPcplx[Endoplasmic Reticulum] + 5 Scj1p[Endoplasmic Reticulum] + 5 Jem1p[Endoplasmic Reticulum] + 5 pi[Endoplasmic Reticulum] + Sec63p[Endoplasmic Reticulum]	protein folding
S000000084-F-G5-Kar2ADPcplx[Endoplasmic Reticulum] + 5 Sil1p[Endoplasmic Reticulum] + 5 Lhs1p[Endoplasmic Reticulum] + 5 ATP[Endoplasmic Reticulum] => S000000084-F-G5[Endoplasmic Reticulum] + 5 Sil1p[Endoplasmic Reticulum] + 5 Lhs1p[Endoplasmic Reticulum] + 5 ADP[Endoplasmic Reticulum] + 5 Kar2p[Endoplasmic Reticulum] protein folding	protein folding	Lhs1p;Sil1p
S000000084-7-G5[Endoplasmic Reticulum] + Sar1-GTP[Endoplasmic Reticulum] + Sec23-Sec24C[Cytoplasm] + Emp24p[Endoplasmic Reticulum] + Bet1p[Endoplasmic Reticulum] + Bos1p[Endoplasmic Reticulum] => S000000084-F-G7-COPII-pbud-cplx[Endoplasmic Reticulum]	COPII(for GPI-anchored cargo)	Sar1p;Sec23p;Sec24p;Bet1p;Bos1p;Emp24p
S000000084-F-G7orG5-COPII-pbud-cplx[Endoplasmic Reticulum] + Sec13-Sec31C[Cytoplasm] + Sec16p[Endoplasmic Reticulum] + Sed4p[Endoplasmic Reticulum] + Sec17p[Endoplasmic Reticulum] => S000000084-F-G5orG7-COPII[COPII]	COPII(common	Sec13p;Sec31p;Sec16p;Sed4p;Sec17p;Sec22p
S000000084-F-G7-COPII[COPII] + TRAPPIC[COPII] + Ypt1p[COPII] + GTP[COPII] => S000000084-F-G7[Golgi] + sar1-GDP[Cytoplasm] + pi[Cytoplasm] + Sec13-Sec31C[Cytoplasm] + Sec16p[Cytoplasm] + Sec23p[COPII] + Sec24p[COPII] + Emp24p[Endoplasmic Reticulum] + Bet3p[Cytoplasm] + Bet5p[Cytoplasm] + Trs20p[Cytoplasm] + Trs23p[Cytoplasm] + Trs31p[Cytoplasm] + Trs33p[Cytoplasm] + Bet1p[Endoplasmic Reticulum] + …	COPII(for GPI-anchored cargo)	Ypt1p;Uso1p;bug1p;Bet3p;Bet5p;Trs20p;Trs23p;Trs31p;Trs33p
S000000084-misf-G6[Cytoplasm] + 0.1 Ssm4p[Endoplasmic Reticulum] + 0.1 SSH1C[Endoplasmic Reticulum] + 0.1 AAAC[Cytoplasm] => S000000084-misf-G6-UBcplx[Cytoplasm]	ERADC	Sbh1p;Sss1p;Ssh1p;Ubx2p;Cdc48p;Ufd1p;Npl4p;Ssm4p
S000000084-misf-G6-UBcplx[Endoplasmic Reticulum] + 5 ATP[Cytoplasm] + 5 Ubiquitin[Cytoplasm] => S000000084-misf-G6-Ubiquitin[Cytoplasm] + 5 ADP[Cytoplasm] + 0.1 Ssm4p[Endoplasmic Reticulum] + 0.1 Sbh1p[Endoplasmic Reticulum] + 0.1 Sss1p[Endoplasmic Reticulum] + 0.1 Ssh1p[Endoplasmic Reticulum] + 0.1 Ubx2p[Endoplasmic Reticulum] + 0.1 Cdc48p[Cytoplasm] + 0.1 Ufd1p[Cytoplasm] + 0.1 Npl4p[Cytoplasm]…	ERADC	Ubiquitin
S000000084-misf-G6-Ubiquitin[Cytoplasm] + 0.1 Png1p[Cytoplasm] + 5 ATP[Cytoplasm] + 0.1 26sproteosome[Cytoplasm] + 5 H2O[Cytoplasm] => G6[Cytoplasm] + 5 Ubiquitin[Cytoplasm] + 5 ADP[Cytoplasm] + 5 pi[Cytoplasm] + 0.1 S000000084aa[Cytoplasm]	ERADC	Png1p; 26sproteosome
S000000084-G5orG7[Golgi] + GDP-man[Golgi] => S000000084-G9[Golgi] + GDP[Golgi]	Golgi processing	Och1p
S000000084-G9[Golgi] + 5 GDP-man[Golgi] => S000000084-G10[Golgi] + 5 GDP[Golgi]	Golgi processing	Mnn9p;Van1p
S000000084-G10[Golgi] + 40 GDP-man[Golgi] => S000000084-G11[Golgi] + 40 GDP[Golgi]	Golgi processing	Anp1p;Mnn9p;Mnn10p;Mnn11p;Hoc1p
S000000084-G15[Golgi] => S000000084-G16[Golgi] + aminoacid[Golgi]	Golgi processing	Kex1p;Kex2p;Ste13p
S000000084-M1[Golgi] + GTP[Cytoplasm] + clathrinC[Cytoplasm] + Arf1p[Cytoplasm] + EXOC[Cytoplasm] => S000000084-M1[cell membrane] + GDP[Golgi] + 2 Chc1p[Cytoplasm] + Clc1p[Cytoplasm] + Arf1p[Cytoplasm] + Sec3p[Cytoplasm] + Sec5p[Cytoplasm] + Sec6p[Cytoplasm] + Sec8p[Cytoplasm] + Sec10p[Cytoplasm] + Sec15p[Cytoplasm] + Exo70p[Cytoplasm] + Exo84p[Cytoplasm] + Sec4p[Cytoplasm]	LDSV(low density Secretory vesicle)	Arf1p;Sec3p;Sec5p;Sec6p;Sec8p;Sec10p;Sec15p;Exo70p;Exo84p;Sec4p;Chc1p;Clc1p
S000004924[Cytoplasm] + SRPC[Cytoplasm] => S000004924-SRPC[Cytoplasm]	translocation from cytosol to ER (SRP-dependent)	Srp14p;Srp21p;Srp54p;Sec65p;Srp68p;Srp72p
S000004924-SRPC[Cytoplasm] + SRC[Endoplasmic Reticulum] => S000004924-SRPC-SRC[Cytoplasm]	translocation from cytosol to ER (SRP-dependent)	Srp101p;Srp102p
S000004924-SRPC-SRC[Cytoplasm] + 2 GTP[Cytoplasm] + SEC61C[Endoplasmic Reticulum] => S000004924-SRPC-SRC-SEC61C[Cytoplasm]	translocation from cytosol to ER (SRP-dependent)	Sec61p;Sbh1p;Sss1p;Ssh1p
S000004924-SRPC-SRC-SEC61C[Cytoplasm] => S000004924-SEC61C[Cytoplasm] + Srp14p[Cytoplasm] + Srp21p[Cytoplasm] + Srp68p[Cytoplasm] + Sec65p[Cytoplasm] + Srp72p[Cytoplasm] + scR1[Cytoplasm] + Srp54p[Cytoplasm] + Srp51p[Cytoplasm] + Srp52p[Cytoplasm] + 2 GDP[Cytoplasm] + 2 pi[Cytoplasm]	translocation from cytosol to ER (SRP-dependent)
S000004924-SEC61C[Cytoplasm] + SPC[Endoplasmic Reticulum] => S000004924[Endoplasmic Reticulum] + Sec61p[Endoplasmic Reticulum] + Sbh1p[Endoplasmic Reticulum] + Sss1p[Endoplasmic Reticulum] + Sec11p[Endoplasmic Reticulum] + Spc1p[Endoplasmic Reticulum] + Spc2p[Endoplasmic Reticulum] + Spc3p[Endoplasmic Reticulum] + sp[Cytoplasm]	translocation from cytosol to ER (SRP-dependent)	Sec11p;Spc1p;Spc2p;Spc3p
S000004924-G5[Endoplasmic Reticulum] + 1 Acyl-PI-GlcN-(man)4-(EtNP)3[Endoplasmic Reticulum] => S000004924-G6[Endoplasmic Reticulum]	GPI biosynthesis	Gaa1p;Gpi8p;Gpi16p;Gpi17p;Gab1p
S000004924-G6[Endoplasmic Reticulum]=> S000004924-G6[Endoplasmic Reticulum] + ?acyl[Endoplasmic Reticulum]	GPI biosynthesis	Bst1p
S000004924-SEC61C[Endoplasmic Reticulum] + 10 Dol-pp-GlcNAc(2)man(9)-Glc(3)[Endoplasmic Reticulum] + OSTC[Endoplasmic Reticulum] => S000004924-G1-SEC61C[Endoplasmic Reticulum] + 10 Dol-ppEndoplasmic Reticulum] + Ost1p[Endoplasmic Reticulum] + Ost2p[Endoplasmic Reticulum] + St3p[Endoplasmic Reticulum] + Ost4p[Endoplasmic Reticulum] + Ost5p[Endoplasmic Reticulum] + Ost6p[Endoplasmic Reticulum] + St…	ER N-glycosylation	Stt3p;Ost1p;Wbp1p;OSt3p;Ost6p;Swp1p;Ost2p;Ost5p;Ost4p
S000004924-G1-SEC61C[Endoplasmic Reticulum] => S000004924-G1[Endoplasmic Reticulum] + SEC61C[Endoplasmic Reticulum]	protein folding
S000004924-G1[Endoplasmic Reticulum] => S000004924-G2[Endoplasmic Reticulum] + Glc[Endoplasmic Reticulum]	protein folding	Cwh41p
S000004924-G2[Endoplasmic Reticulum] => S000004924-G3[Endoplasmic Reticulum] + Glc[Endoplasmic Reticulum]	protein folding	Rot2p
S000004924-G3[Endoplasmic Reticulum] => S000004924-G4[Endoplasmic Reticulum] + Glc[Endoplasmic Reticulum]	protein folding	Rot2p
S000004924-G4[Endoplasmic Reticulum] => S000004924-G5[Endoplasmic Reticulum] + man[Endoplasmic Reticulum]	protein folding	Mns1p
S000004924-G5[Endoplasmic Reticulum] + 5 Kar2p[Endoplasmic Reticulum] + 5 ATP[Endoplasmic Reticulum] + 5 Scj1p[Endoplasmic Reticulum] + 5 Jem1p[Endoplasmic Reticulum] + 5 Sec63p[Endoplasmic Reticulum] => S000004924-G5-Kar2ATPcplx[Endoplasmic Reticulum]	protein folding	Kar2p;Scj1p;Jem1p;Sec63p
S000004924-G5-Kar2ATPcplx[Endoplasmic Reticulum] + Pdi1p[Endoplasmic Reticulum] + Ero1p[Endoplasmic Reticulum] + ?O2[Endoplasmic Reticulum] + 7 FADH[Endoplasmic Reticulum] + Erv2p[Endoplasmic Reticulum] => S000004924-S-G5-Kar2ATPcplx[Endoplasmic Reticulum] + ?H2O[Endoplasmic Reticulum] + 7 FAD[Endoplasmic Reticulum]	protein folding	Pdi1p;Ero1p;Erv2p;Kar2p
S000004924-S-G5-Kar2ATPcplx-[Endoplasmic Reticulum] => S000004924-F-G5-Kar2ADPcplx[Endoplasmic Reticulum] + 5 Scj1p[Endoplasmic Reticulum] + 5 Jem1p[Endoplasmic Reticulum] + 5 pi[Endoplasmic Reticulum] + Sec63p[Endoplasmic Reticulum] + Pdi1p[Endoplasmic Reticulum] + Ero1p[Endoplasmic Reticulum] + Erv2p[Endoplasmic Reticulum]	protein folding	Scj1p;Jem1p;Sec63p
S000004924-F-G5-Kar2ADPcplx[Endoplasmic Reticulum] + 5 Sil1p[Endoplasmic Reticulum] + 5 Lhs1p[Endoplasmic Reticulum] + 5 ATP[Endoplasmic Reticulum] => S000004924-F-G5[Endoplasmic Reticulum] + 5 Sil1p[Endoplasmic Reticulum] + 5 Lhs1p[Endoplasmic Reticulum] + 5 ADP[Endoplasmic Reticulum] + 5 Kar2p[Endoplasmic Reticulum] protein folding	protein folding	Lhs1p;Sil1p
S000004924-7-G5[Endoplasmic Reticulum] + Sar1-GTP[Endoplasmic Reticulum] + Sec23-Sec24C[Cytoplasm] + Emp24p[Endoplasmic Reticulum] + Bet1p[Endoplasmic Reticulum] + Bos1p[Endoplasmic Reticulum] => S000004924-F-G7-COPII-pbud-cplx[Endoplasmic Reticulum]	COPII(for GPI-anchored cargo)	Sar1p;Sec23p;Sec24p;Bet1p;Bos1p;Emp24p
S000004924-F-G7orG5-COPII-pbud-cplx[Endoplasmic Reticulum] + Sec13-Sec31C[Cytoplasm] + Sec16p[Endoplasmic Reticulum] + Sed4p[Endoplasmic Reticulum] + Sec17p[Endoplasmic Reticulum] => S000004924-F-G5orG7-COPII[COPII]	COPII(common	Sec13p;Sec31p;Sec16p;Sed4p;Sec17p;Sec22p
S000004924-F-G7-COPII[COPII] + TRAPPIC[COPII] + Ypt1p[COPII] + GTP[COPII] => S000004924-F-G7[Golgi] + sar1-GDP[Cytoplasm] + pi[Cytoplasm] + Sec13-Sec31C[Cytoplasm] + Sec16p[Cytoplasm] + Sec23p[COPII] + Sec24p[COPII] + Emp24p[Endoplasmic Reticulum] + Bet3p[Cytoplasm] + Bet5p[Cytoplasm] + Trs20p[Cytoplasm] + Trs23p[Cytoplasm] + Trs31p[Cytoplasm] + Trs33p[Cytoplasm] + Bet1p[Endoplasmic Reticulum] + …	COPII(for GPI-anchored cargo)	Ypt1p;Uso1p;bug1p;Bet3p;Bet5p;Trs20p;Trs23p;Trs31p;Trs33p
S000004924-misf-G6[Cytoplasm] + 0.1 Ssm4p[Endoplasmic Reticulum] + 0.1 SSH1C[Endoplasmic Reticulum] + 0.1 AAAC[Cytoplasm] => S000004924-misf-G6-UBcplx[Cytoplasm]	ERADC	Sbh1p;Sss1p;Ssh1p;Ubx2p;Cdc48p;Ufd1p;Npl4p;Ssm4p
S000004924-misf-G6-UBcplx[Endoplasmic Reticulum] + 5 ATP[Cytoplasm] + 5 Ubiquitin[Cytoplasm] => S000004924-misf-G6-Ubiquitin[Cytoplasm] + 5 ADP[Cytoplasm] + 0.1 Ssm4p[Endoplasmic Reticulum] + 0.1 Sbh1p[Endoplasmic Reticulum] + 0.1 Sss1p[Endoplasmic Reticulum] + 0.1 Ssh1p[Endoplasmic Reticulum] + 0.1 Ubx2p[Endoplasmic Reticulum] + 0.1 Cdc48p[Cytoplasm] + 0.1 Ufd1p[Cytoplasm] + 0.1 Npl4p[Cytoplasm]…	ERADC	Ubiquitin
S000004924-misf-G6-Ubiquitin[Cytoplasm] + 0.1 Png1p[Cytoplasm] + 5 ATP[Cytoplasm] + 0.1 26sproteosome[Cytoplasm] + 5 H2O[Cytoplasm] => G6[Cytoplasm] + 5 Ubiquitin[Cytoplasm] + 5 ADP[Cytoplasm] + 5 pi[Cytoplasm] + 0.1 S000004924aa[Cytoplasm]	ERADC	Png1p; 26sproteosome
S000004924-G5orG7[Golgi] + GDP-man[Golgi] => S000004924-G9[Golgi] + GDP[Golgi]	Golgi processing	Och1p
S000004924-G9[Golgi] + 5 GDP-man[Golgi] => S000004924-G10[Golgi] + 5 GDP[Golgi]	Golgi processing	Mnn9p;Van1p
S000004924-G10[Golgi] + 40 GDP-man[Golgi] => S000004924-G11[Golgi] + 40 GDP[Golgi]	Golgi processing	Anp1p;Mnn9p;Mnn10p;Mnn11p;Hoc1p
S000004924-G15[Golgi] => S000004924-G16[Golgi] + aminoacid[Golgi]	Golgi processing	Kex1p;Kex2p;Ste13p
S000004924-M1[Golgi] + GTP[Cytoplasm] + clathrinC[Cytoplasm] + Arf1p[Cytoplasm] + EXOC[Cytoplasm] => S000004924-M1[cell membrane] + GDP[Golgi] + 2 Chc1p[Cytoplasm] + Clc1p[Cytoplasm] + Arf1p[Cytoplasm] + Sec3p[Cytoplasm] + Sec5p[Cytoplasm] + Sec6p[Cytoplasm] + Sec8p[Cytoplasm] + Sec10p[Cytoplasm] + Sec15p[Cytoplasm] + Exo70p[Cytoplasm] + Exo84p[Cytoplasm] + Sec4p[Cytoplasm]	LDSV(low density Secretory vesicle)	Arf1p;Sec3p;Sec5p;Sec6p;Sec8p;Sec10p;Sec15p;Exo70p;Exo84p;Sec4p;Chc1p;Clc1p
S000005266[Cytoplasm] + SRPC[Cytoplasm] => S000005266-SRPC[Cytoplasm]	translocation from cytosol to ER (SRP-dependent)	Srp14p;Srp21p;Srp54p;Sec65p;Srp68p;Srp72p
S000005266-SRPC[Cytoplasm] + SRC[Endoplasmic Reticulum] => S000005266-SRPC-SRC[Cytoplasm]	translocation from cytosol to ER (SRP-dependent)	Srp101p;Srp102p
S000005266-SRPC-SRC[Cytoplasm] + 2 GTP[Cytoplasm] + SEC61C[Endoplasmic Reticulum] => S000005266-SRPC-SRC-SEC61C[Cytoplasm]	translocation from cytosol to ER (SRP-dependent)	Sec61p;Sbh1p;Sss1p;Ssh1p
S000005266-SRPC-SRC-SEC61C[Cytoplasm] => S000005266-SEC61C[Cytoplasm] + Srp14p[Cytoplasm] + Srp21p[Cytoplasm] + Srp68p[Cytoplasm] + Sec65p[Cytoplasm] + Srp72p[Cytoplasm] + scR1[Cytoplasm] + Srp54p[Cytoplasm] + Srp51p[Cytoplasm] + Srp52p[Cytoplasm] + 2 GDP[Cytoplasm] + 2 pi[Cytoplasm]	translocation from cytosol to ER (SRP-dependent)
S000005266-SEC61C[Cytoplasm] + SPC[Endoplasmic Reticulum] => S000005266[Endoplasmic Reticulum] + Sec61p[Endoplasmic Reticulum] + Sbh1p[Endoplasmic Reticulum] + Sss1p[Endoplasmic Reticulum] + Sec11p[Endoplasmic Reticulum] + Spc1p[Endoplasmic Reticulum] + Spc2p[Endoplasmic Reticulum] + Spc3p[Endoplasmic Reticulum] + sp[Cytoplasm]	translocation from cytosol to ER (SRP-dependent)	Sec11p;Spc1p;Spc2p;Spc3p
S000005266-G5[Endoplasmic Reticulum] + 1 Acyl-PI-GlcN-(man)4-(EtNP)3[Endoplasmic Reticulum] => S000005266-G6[Endoplasmic Reticulum]	GPI biosynthesis	Gaa1p;Gpi8p;Gpi16p;Gpi17p;Gab1p
S000005266-G6[Endoplasmic Reticulum]=> S000005266-G6[Endoplasmic Reticulum] + ?acyl[Endoplasmic Reticulum]	GPI biosynthesis	Bst1p
S000005266-G1-SEC61C[Endoplasmic Reticulum] => S000005266-G1[Endoplasmic Reticulum] + SEC61C[Endoplasmic Reticulum]	protein folding
S000005266-G5[Endoplasmic Reticulum] + 5 Kar2p[Endoplasmic Reticulum] + 5 ATP[Endoplasmic Reticulum] + 5 Scj1p[Endoplasmic Reticulum] + 5 Jem1p[Endoplasmic Reticulum] + 5 Sec63p[Endoplasmic Reticulum] => S000005266-G5-Kar2ATPcplx[Endoplasmic Reticulum]	protein folding	Kar2p;Scj1p;Jem1p;Sec63p
S000005266-G5-Kar2ATPcplx-[Endoplasmic Reticulum] => S000005266-F-G5-Kar2ADPcplx[Endoplasmic Reticulum] + 5 Scj1p[Endoplasmic Reticulum] + 5 Jem1p[Endoplasmic Reticulum] + 5 pi[Endoplasmic Reticulum] + Sec63p[Endoplasmic Reticulum]	protein folding
S000005266-F-G5-Kar2ADPcplx[Endoplasmic Reticulum] + 5 Sil1p[Endoplasmic Reticulum] + 5 Lhs1p[Endoplasmic Reticulum] + 5 ATP[Endoplasmic Reticulum] => S000005266-F-G5[Endoplasmic Reticulum] + 5 Sil1p[Endoplasmic Reticulum] + 5 Lhs1p[Endoplasmic Reticulum] + 5 ADP[Endoplasmic Reticulum] + 5 Kar2p[Endoplasmic Reticulum] protein folding	protein folding	Lhs1p;Sil1p
S000005266-7-G5[Endoplasmic Reticulum] + Sar1-GTP[Endoplasmic Reticulum] + Sec23-Sec24C[Cytoplasm] + Emp24p[Endoplasmic Reticulum] + Bet1p[Endoplasmic Reticulum] + Bos1p[Endoplasmic Reticulum] => S000005266-F-G7-COPII-pbud-cplx[Endoplasmic Reticulum]	COPII(for GPI-anchored cargo)	Sar1p;Sec23p;Sec24p;Bet1p;Bos1p;Emp24p
S000005266-F-G7orG5-COPII-pbud-cplx[Endoplasmic Reticulum] + Sec13-Sec31C[Cytoplasm] + Sec16p[Endoplasmic Reticulum] + Sed4p[Endoplasmic Reticulum] + Sec17p[Endoplasmic Reticulum] => S000005266-F-G5orG7-COPII[COPII]	COPII(common	Sec13p;Sec31p;Sec16p;Sed4p;Sec17p;Sec22p
S000005266-F-G7-COPII[COPII] + TRAPPIC[COPII] + Ypt1p[COPII] + GTP[COPII] => S000005266-F-G7[Golgi] + sar1-GDP[Cytoplasm] + pi[Cytoplasm] + Sec13-Sec31C[Cytoplasm] + Sec16p[Cytoplasm] + Sec23p[COPII] + Sec24p[COPII] + Emp24p[Endoplasmic Reticulum] + Bet3p[Cytoplasm] + Bet5p[Cytoplasm] + Trs20p[Cytoplasm] + Trs23p[Cytoplasm] + Trs31p[Cytoplasm] + Trs33p[Cytoplasm] + Bet1p[Endoplasmic Reticulum] + …	COPII(for GPI-anchored cargo)	Ypt1p;Uso1p;bug1p;Bet3p;Bet5p;Trs20p;Trs23p;Trs31p;Trs33p
S000005266-misf-G6[Cytoplasm] + 0.1 Ssm4p[Endoplasmic Reticulum] + 0.1 SSH1C[Endoplasmic Reticulum] + 0.1 AAAC[Cytoplasm] => S000005266-misf-G6-UBcplx[Cytoplasm]	ERADC	Sbh1p;Sss1p;Ssh1p;Ubx2p;Cdc48p;Ufd1p;Npl4p;Ssm4p
S000005266-misf-G6-UBcplx[Endoplasmic Reticulum] + 5 ATP[Cytoplasm] + 5 Ubiquitin[Cytoplasm] => S000005266-misf-G6-Ubiquitin[Cytoplasm] + 5 ADP[Cytoplasm] + 0.1 Ssm4p[Endoplasmic Reticulum] + 0.1 Sbh1p[Endoplasmic Reticulum] + 0.1 Sss1p[Endoplasmic Reticulum] + 0.1 Ssh1p[Endoplasmic Reticulum] + 0.1 Ubx2p[Endoplasmic Reticulum] + 0.1 Cdc48p[Cytoplasm] + 0.1 Ufd1p[Cytoplasm] + 0.1 Npl4p[Cytoplasm]…	ERADC	Ubiquitin
S000005266-misf-G6-Ubiquitin[Cytoplasm] + 0.1 Png1p[Cytoplasm] + 5 ATP[Cytoplasm] + 0.1 26sproteosome[Cytoplasm] + 5 H2O[Cytoplasm] => G6[Cytoplasm] + 5 Ubiquitin[Cytoplasm] + 5 ADP[Cytoplasm] + 5 pi[Cytoplasm] + 0.1 S000005266aa[Cytoplasm]	ERADC	Png1p; 26sproteosome
S000005266-G15[Golgi] => S000005266-G16[Golgi] + aminoacid[Golgi]	Golgi processing	Kex1p;Kex2p;Ste13p
S000005266-M1[Golgi] + GTP[Cytoplasm] + clathrinC[Cytoplasm] + Arf1p[Cytoplasm] + EXOC[Cytoplasm] => S000005266-M1[cell membrane] + GDP[Golgi] + 2 Chc1p[Cytoplasm] + Clc1p[Cytoplasm] + Arf1p[Cytoplasm] + Sec3p[Cytoplasm] + Sec5p[Cytoplasm] + Sec6p[Cytoplasm] + Sec8p[Cytoplasm] + Sec10p[Cytoplasm] + Sec15p[Cytoplasm] + Exo70p[Cytoplasm] + Exo84p[Cytoplasm] + Sec4p[Cytoplasm]	LDSV(low density Secretory vesicle)	Arf1p;Sec3p;Sec5p;Sec6p;Sec8p;Sec10p;Sec15p;Exo70p;Exo84p;Sec4p;Chc1p;Clc1p
S000002551[Cytoplasm] + SRPC[Cytoplasm] => S000002551-SRPC[Cytoplasm]	translocation from cytosol to ER (SRP-dependent)	Srp14p;Srp21p;Srp54p;Sec65p;Srp68p;Srp72p
S000002551-SRPC[Cytoplasm] + SRC[Endoplasmic Reticulum] => S000002551-SRPC-SRC[Cytoplasm]	translocation from cytosol to ER (SRP-dependent)	Srp101p;Srp102p
S000002551-SRPC-SRC[Cytoplasm] + 2 GTP[Cytoplasm] + SEC61C[Endoplasmic Reticulum] => S000002551-SRPC-SRC-SEC61C[Cytoplasm]	translocation from cytosol to ER (SRP-dependent)	Sec61p;Sbh1p;Sss1p;Ssh1p
S000002551-SRPC-SRC-SEC61C[Cytoplasm] => S000002551-SEC61C[Cytoplasm] + Srp14p[Cytoplasm] + Srp21p[Cytoplasm] + Srp68p[Cytoplasm] + Sec65p[Cytoplasm] + Srp72p[Cytoplasm] + scR1[Cytoplasm] + Srp54p[Cytoplasm] + Srp51p[Cytoplasm] + Srp52p[Cytoplasm] + 2 GDP[Cytoplasm] + 2 pi[Cytoplasm]	translocation from cytosol to ER (SRP-dependent)
S000002551-SEC61C[Cytoplasm] + SPC[Endoplasmic Reticulum] => S000002551[Endoplasmic Reticulum] + Sec61p[Endoplasmic Reticulum] + Sbh1p[Endoplasmic Reticulum] + Sss1p[Endoplasmic Reticulum] + Sec11p[Endoplasmic Reticulum] + Spc1p[Endoplasmic Reticulum] + Spc2p[Endoplasmic Reticulum] + Spc3p[Endoplasmic Reticulum] + sp[Cytoplasm]	translocation from cytosol to ER (SRP-dependent)	Sec11p;Spc1p;Spc2p;Spc3p
S000002551-G5[Endoplasmic Reticulum] + 1 Acyl-PI-GlcN-(man)4-(EtNP)3[Endoplasmic Reticulum] => S000002551-G6[Endoplasmic Reticulum]	GPI biosynthesis	Gaa1p;Gpi8p;Gpi16p;Gpi17p;Gab1p
S000002551-G6[Endoplasmic Reticulum]=> S000002551-G6[Endoplasmic Reticulum] + ?acyl[Endoplasmic Reticulum]	GPI biosynthesis	Bst1p
S000002551-SEC61C[Endoplasmic Reticulum] + 9 Dol-pp-GlcNAc(2)man(9)-Glc(3)[Endoplasmic Reticulum] + OSTC[Endoplasmic Reticulum] => S000002551-G1-SEC61C[Endoplasmic Reticulum] + 9 Dol-ppEndoplasmic Reticulum] + Ost1p[Endoplasmic Reticulum] + Ost2p[Endoplasmic Reticulum] + St3p[Endoplasmic Reticulum] + Ost4p[Endoplasmic Reticulum] + Ost5p[Endoplasmic Reticulum] + Ost6p[Endoplasmic Reticulum] + Stt3…	ER N-glycosylation	Stt3p;Ost1p;Wbp1p;OSt3p;Ost6p;Swp1p;Ost2p;Ost5p;Ost4p
S000002551-G1-SEC61C[Endoplasmic Reticulum] => S000002551-G1[Endoplasmic Reticulum] + SEC61C[Endoplasmic Reticulum]	protein folding
S000002551-G1[Endoplasmic Reticulum] => S000002551-G2[Endoplasmic Reticulum] + Glc[Endoplasmic Reticulum]	protein folding	Cwh41p
S000002551-G2[Endoplasmic Reticulum] => S000002551-G3[Endoplasmic Reticulum] + Glc[Endoplasmic Reticulum]	protein folding	Rot2p
S000002551-G3[Endoplasmic Reticulum] => S000002551-G4[Endoplasmic Reticulum] + Glc[Endoplasmic Reticulum]	protein folding	Rot2p
S000002551-G4[Endoplasmic Reticulum] => S000002551-G5[Endoplasmic Reticulum] + man[Endoplasmic Reticulum]	protein folding	Mns1p
S000002551-G5[Endoplasmic Reticulum] + 5 Kar2p[Endoplasmic Reticulum] + 5 ATP[Endoplasmic Reticulum] + 5 Scj1p[Endoplasmic Reticulum] + 5 Jem1p[Endoplasmic Reticulum] + 5 Sec63p[Endoplasmic Reticulum] => S000002551-G5-Kar2ATPcplx[Endoplasmic Reticulum]	protein folding	Kar2p;Scj1p;Jem1p;Sec63p
S000002551-G5-Kar2ATPcplx-[Endoplasmic Reticulum] => S000002551-F-G5-Kar2ADPcplx[Endoplasmic Reticulum] + 5 Scj1p[Endoplasmic Reticulum] + 5 Jem1p[Endoplasmic Reticulum] + 5 pi[Endoplasmic Reticulum] + Sec63p[Endoplasmic Reticulum]	protein folding
S000002551-F-G5-Kar2ADPcplx[Endoplasmic Reticulum] + 5 Sil1p[Endoplasmic Reticulum] + 5 Lhs1p[Endoplasmic Reticulum] + 5 ATP[Endoplasmic Reticulum] => S000002551-F-G5[Endoplasmic Reticulum] + 5 Sil1p[Endoplasmic Reticulum] + 5 Lhs1p[Endoplasmic Reticulum] + 5 ADP[Endoplasmic Reticulum] + 5 Kar2p[Endoplasmic Reticulum] protein folding	protein folding	Lhs1p;Sil1p
S000002551-7-G5[Endoplasmic Reticulum] + Sar1-GTP[Endoplasmic Reticulum] + Sec23-Sec24C[Cytoplasm] + Emp24p[Endoplasmic Reticulum] + Bet1p[Endoplasmic Reticulum] + Bos1p[Endoplasmic Reticulum] => S000002551-F-G7-COPII-pbud-cplx[Endoplasmic Reticulum]	COPII(for GPI-anchored cargo)	Sar1p;Sec23p;Sec24p;Bet1p;Bos1p;Emp24p
S000002551-F-G7orG5-COPII-pbud-cplx[Endoplasmic Reticulum] + Sec13-Sec31C[Cytoplasm] + Sec16p[Endoplasmic Reticulum] + Sed4p[Endoplasmic Reticulum] + Sec17p[Endoplasmic Reticulum] => S000002551-F-G5orG7-COPII[COPII]	COPII(common	Sec13p;Sec31p;Sec16p;Sed4p;Sec17p;Sec22p
S000002551-F-G7-COPII[COPII] + TRAPPIC[COPII] + Ypt1p[COPII] + GTP[COPII] => S000002551-F-G7[Golgi] + sar1-GDP[Cytoplasm] + pi[Cytoplasm] + Sec13-Sec31C[Cytoplasm] + Sec16p[Cytoplasm] + Sec23p[COPII] + Sec24p[COPII] + Emp24p[Endoplasmic Reticulum] + Bet3p[Cytoplasm] + Bet5p[Cytoplasm] + Trs20p[Cytoplasm] + Trs23p[Cytoplasm] + Trs31p[Cytoplasm] + Trs33p[Cytoplasm] + Bet1p[Endoplasmic Reticulum] + …	COPII(for GPI-anchored cargo)	Ypt1p;Uso1p;bug1p;Bet3p;Bet5p;Trs20p;Trs23p;Trs31p;Trs33p
S000002551-misf-G6[Cytoplasm] + 0.1 Ssm4p[Endoplasmic Reticulum] + 0.1 SSH1C[Endoplasmic Reticulum] + 0.1 AAAC[Cytoplasm] => S000002551-misf-G6-UBcplx[Cytoplasm]	ERADC	Sbh1p;Sss1p;Ssh1p;Ubx2p;Cdc48p;Ufd1p;Npl4p;Ssm4p
S000002551-misf-G6-UBcplx[Endoplasmic Reticulum] + 5 ATP[Cytoplasm] + 5 Ubiquitin[Cytoplasm] => S000002551-misf-G6-Ubiquitin[Cytoplasm] + 5 ADP[Cytoplasm] + 0.1 Ssm4p[Endoplasmic Reticulum] + 0.1 Sbh1p[Endoplasmic Reticulum] + 0.1 Sss1p[Endoplasmic Reticulum] + 0.1 Ssh1p[Endoplasmic Reticulum] + 0.1 Ubx2p[Endoplasmic Reticulum] + 0.1 Cdc48p[Cytoplasm] + 0.1 Ufd1p[Cytoplasm] + 0.1 Npl4p[Cytoplasm]…	ERADC	Ubiquitin
S000002551-misf-G6-Ubiquitin[Cytoplasm] + 0.1 Png1p[Cytoplasm] + 5 ATP[Cytoplasm] + 0.1 26sproteosome[Cytoplasm] + 5 H2O[Cytoplasm] => G6[Cytoplasm] + 5 Ubiquitin[Cytoplasm] + 5 ADP[Cytoplasm] + 5 pi[Cytoplasm] + 0.1 S000002551aa[Cytoplasm]	ERADC	Png1p; 26sproteosome
S000002551-G5orG7[Golgi] + GDP-man[Golgi] => S000002551-G9[Golgi] + GDP[Golgi]	Golgi processing	Och1p
S000002551-G9[Golgi] + 5 GDP-man[Golgi] => S000002551-G10[Golgi] + 5 GDP[Golgi]	Golgi processing	Mnn9p;Van1p
S000002551-G10[Golgi] + 40 GDP-man[Golgi] => S000002551-G11[Golgi] + 40 GDP[Golgi]	Golgi processing	Anp1p;Mnn9p;Mnn10p;Mnn11p;Hoc1p
S000002551-G15[Golgi] => S000002551-G16[Golgi] + aminoacid[Golgi]	Golgi processing	Kex1p;Kex2p;Ste13p
S000002551-M1[Golgi] + GTP[Cytoplasm] + clathrinC[Cytoplasm] + Arf1p[Cytoplasm] + EXOC[Cytoplasm] => S000002551-M1[cell membrane] + GDP[Golgi] + 2 Chc1p[Cytoplasm] + Clc1p[Cytoplasm] + Arf1p[Cytoplasm] + Sec3p[Cytoplasm] + Sec5p[Cytoplasm] + Sec6p[Cytoplasm] + Sec8p[Cytoplasm] + Sec10p[Cytoplasm] + Sec15p[Cytoplasm] + Exo70p[Cytoplasm] + Exo84p[Cytoplasm] + Sec4p[Cytoplasm]	LDSV(low density Secretory vesicle)	Arf1p;Sec3p;Sec5p;Sec6p;Sec8p;Sec10p;Sec15p;Exo70p;Exo84p;Sec4p;Chc1p;Clc1p
S000002462[Cytoplasm] + SRPC[Cytoplasm] => S000002462-SRPC[Cytoplasm]	translocation from cytosol to ER (SRP-dependent)	Srp14p;Srp21p;Srp54p;Sec65p;Srp68p;Srp72p
S000002462-SRPC[Cytoplasm] + SRC[Endoplasmic Reticulum] => S000002462-SRPC-SRC[Cytoplasm]	translocation from cytosol to ER (SRP-dependent)	Srp101p;Srp102p
S000002462-SRPC-SRC[Cytoplasm] + 2 GTP[Cytoplasm] + SEC61C[Endoplasmic Reticulum] => S000002462-SRPC-SRC-SEC61C[Cytoplasm]	translocation from cytosol to ER (SRP-dependent)	Sec61p;Sbh1p;Sss1p;Ssh1p
S000002462-SRPC-SRC-SEC61C[Cytoplasm] => S000002462-SEC61C[Cytoplasm] + Srp14p[Cytoplasm] + Srp21p[Cytoplasm] + Srp68p[Cytoplasm] + Sec65p[Cytoplasm] + Srp72p[Cytoplasm] + scR1[Cytoplasm] + Srp54p[Cytoplasm] + Srp51p[Cytoplasm] + Srp52p[Cytoplasm] + 2 GDP[Cytoplasm] + 2 pi[Cytoplasm]	translocation from cytosol to ER (SRP-dependent)
S000002462-SEC61C[Cytoplasm] + SPC[Endoplasmic Reticulum] => S000002462[Endoplasmic Reticulum] + Sec61p[Endoplasmic Reticulum] + Sbh1p[Endoplasmic Reticulum] + Sss1p[Endoplasmic Reticulum] + Sec11p[Endoplasmic Reticulum] + Spc1p[Endoplasmic Reticulum] + Spc2p[Endoplasmic Reticulum] + Spc3p[Endoplasmic Reticulum] + sp[Cytoplasm]	translocation from cytosol to ER (SRP-dependent)	Sec11p;Spc1p;Spc2p;Spc3p
S000002462-G5[Endoplasmic Reticulum] + 1 Acyl-PI-GlcN-(man)4-(EtNP)3[Endoplasmic Reticulum] => S000002462-G6[Endoplasmic Reticulum]	GPI biosynthesis	Gaa1p;Gpi8p;Gpi16p;Gpi17p;Gab1p
S000002462-G6[Endoplasmic Reticulum]=> S000002462-G6[Endoplasmic Reticulum] + ?acyl[Endoplasmic Reticulum]	GPI biosynthesis	Bst1p
S000002462-SEC61C[Endoplasmic Reticulum] + 15 Dol-pp-GlcNAc(2)man(9)-Glc(3)[Endoplasmic Reticulum] + OSTC[Endoplasmic Reticulum] => S000002462-G1-SEC61C[Endoplasmic Reticulum] + 15 Dol-ppEndoplasmic Reticulum] + Ost1p[Endoplasmic Reticulum] + Ost2p[Endoplasmic Reticulum] + St3p[Endoplasmic Reticulum] + Ost4p[Endoplasmic Reticulum] + Ost5p[Endoplasmic Reticulum] + Ost6p[Endoplasmic Reticulum] + St…	ER N-glycosylation	Stt3p;Ost1p;Wbp1p;OSt3p;Ost6p;Swp1p;Ost2p;Ost5p;Ost4p
S000002462-G1-SEC61C[Endoplasmic Reticulum] => S000002462-G1[Endoplasmic Reticulum] + SEC61C[Endoplasmic Reticulum]	protein folding
S000002462-G1[Endoplasmic Reticulum] => S000002462-G2[Endoplasmic Reticulum] + Glc[Endoplasmic Reticulum]	protein folding	Cwh41p
S000002462-G2[Endoplasmic Reticulum] => S000002462-G3[Endoplasmic Reticulum] + Glc[Endoplasmic Reticulum]	protein folding	Rot2p
S000002462-G3[Endoplasmic Reticulum] => S000002462-G4[Endoplasmic Reticulum] + Glc[Endoplasmic Reticulum]	protein folding	Rot2p
S000002462-G4[Endoplasmic Reticulum] => S000002462-G5[Endoplasmic Reticulum] + man[Endoplasmic Reticulum]	protein folding	Mns1p
S000002462-G5[Endoplasmic Reticulum] + 5 Kar2p[Endoplasmic Reticulum] + 5 ATP[Endoplasmic Reticulum] + 5 Scj1p[Endoplasmic Reticulum] + 5 Jem1p[Endoplasmic Reticulum] + 5 Sec63p[Endoplasmic Reticulum] => S000002462-G5-Kar2ATPcplx[Endoplasmic Reticulum]	protein folding	Kar2p;Scj1p;Jem1p;Sec63p
S000002462-G5-Kar2ATPcplx-[Endoplasmic Reticulum] => S000002462-F-G5-Kar2ADPcplx[Endoplasmic Reticulum] + 5 Scj1p[Endoplasmic Reticulum] + 5 Jem1p[Endoplasmic Reticulum] + 5 pi[Endoplasmic Reticulum] + Sec63p[Endoplasmic Reticulum]	protein folding
S000002462-F-G5-Kar2ADPcplx[Endoplasmic Reticulum] + 5 Sil1p[Endoplasmic Reticulum] + 5 Lhs1p[Endoplasmic Reticulum] + 5 ATP[Endoplasmic Reticulum] => S000002462-F-G5[Endoplasmic Reticulum] + 5 Sil1p[Endoplasmic Reticulum] + 5 Lhs1p[Endoplasmic Reticulum] + 5 ADP[Endoplasmic Reticulum] + 5 Kar2p[Endoplasmic Reticulum] protein folding	protein folding	Lhs1p;Sil1p
S000002462-7-G5[Endoplasmic Reticulum] + Sar1-GTP[Endoplasmic Reticulum] + Sec23-Sec24C[Cytoplasm] + Emp24p[Endoplasmic Reticulum] + Bet1p[Endoplasmic Reticulum] + Bos1p[Endoplasmic Reticulum] => S000002462-F-G7-COPII-pbud-cplx[Endoplasmic Reticulum]	COPII(for GPI-anchored cargo)	Sar1p;Sec23p;Sec24p;Bet1p;Bos1p;Emp24p
S000002462-F-G7orG5-COPII-pbud-cplx[Endoplasmic Reticulum] + Sec13-Sec31C[Cytoplasm] + Sec16p[Endoplasmic Reticulum] + Sed4p[Endoplasmic Reticulum] + Sec17p[Endoplasmic Reticulum] => S000002462-F-G5orG7-COPII[COPII]	COPII(common	Sec13p;Sec31p;Sec16p;Sed4p;Sec17p;Sec22p
S000002462-F-G7-COPII[COPII] + TRAPPIC[COPII] + Ypt1p[COPII] + GTP[COPII] => S000002462-F-G7[Golgi] + sar1-GDP[Cytoplasm] + pi[Cytoplasm] + Sec13-Sec31C[Cytoplasm] + Sec16p[Cytoplasm] + Sec23p[COPII] + Sec24p[COPII] + Emp24p[Endoplasmic Reticulum] + Bet3p[Cytoplasm] + Bet5p[Cytoplasm] + Trs20p[Cytoplasm] + Trs23p[Cytoplasm] + Trs31p[Cytoplasm] + Trs33p[Cytoplasm] + Bet1p[Endoplasmic Reticulum] + …	COPII(for GPI-anchored cargo)	Ypt1p;Uso1p;bug1p;Bet3p;Bet5p;Trs20p;Trs23p;Trs31p;Trs33p
S000002462-misf-G6[Cytoplasm] + 0.1 Ssm4p[Endoplasmic Reticulum] + 0.1 SSH1C[Endoplasmic Reticulum] + 0.1 AAAC[Cytoplasm] => S000002462-misf-G6-UBcplx[Cytoplasm]	ERADC	Sbh1p;Sss1p;Ssh1p;Ubx2p;Cdc48p;Ufd1p;Npl4p;Ssm4p
S000002462-misf-G6-UBcplx[Endoplasmic Reticulum] + 5 ATP[Cytoplasm] + 5 Ubiquitin[Cytoplasm] => S000002462-misf-G6-Ubiquitin[Cytoplasm] + 5 ADP[Cytoplasm] + 0.1 Ssm4p[Endoplasmic Reticulum] + 0.1 Sbh1p[Endoplasmic Reticulum] + 0.1 Sss1p[Endoplasmic Reticulum] + 0.1 Ssh1p[Endoplasmic Reticulum] + 0.1 Ubx2p[Endoplasmic Reticulum] + 0.1 Cdc48p[Cytoplasm] + 0.1 Ufd1p[Cytoplasm] + 0.1 Npl4p[Cytoplasm]…	ERADC	Ubiquitin
S000002462-misf-G6-Ubiquitin[Cytoplasm] + 0.1 Png1p[Cytoplasm] + 5 ATP[Cytoplasm] + 0.1 26sproteosome[Cytoplasm] + 5 H2O[Cytoplasm] => G6[Cytoplasm] + 5 Ubiquitin[Cytoplasm] + 5 ADP[Cytoplasm] + 5 pi[Cytoplasm] + 0.1 S000002462aa[Cytoplasm]	ERADC	Png1p; 26sproteosome
S000002462-G5orG7[Golgi] + GDP-man[Golgi] => S000002462-G9[Golgi] + GDP[Golgi]	Golgi processing	Och1p
S000002462-G9[Golgi] + 5 GDP-man[Golgi] => S000002462-G10[Golgi] + 5 GDP[Golgi]	Golgi processing	Mnn9p;Van1p
S000002462-G10[Golgi] + 40 GDP-man[Golgi] => S000002462-G11[Golgi] + 40 GDP[Golgi]	Golgi processing	Anp1p;Mnn9p;Mnn10p;Mnn11p;Hoc1p
S000002462-G15[Golgi] => S000002462-G16[Golgi] + aminoacid[Golgi]	Golgi processing	Kex1p;Kex2p;Ste13p
S000002462-M1[Golgi] + GTP[Cytoplasm] + clathrinC[Cytoplasm] + Arf1p[Cytoplasm] + EXOC[Cytoplasm] => S000002462-M1[cell membrane] + GDP[Golgi] + 2 Chc1p[Cytoplasm] + Clc1p[Cytoplasm] + Arf1p[Cytoplasm] + Sec3p[Cytoplasm] + Sec5p[Cytoplasm] + Sec6p[Cytoplasm] + Sec8p[Cytoplasm] + Sec10p[Cytoplasm] + Sec15p[Cytoplasm] + Exo70p[Cytoplasm] + Exo84p[Cytoplasm] + Sec4p[Cytoplasm]	LDSV(low density Secretory vesicle)	Arf1p;Sec3p;Sec5p;Sec6p;Sec8p;Sec10p;Sec15p;Exo70p;Exo84p;Sec4p;Chc1p;Clc1p
S000004184[Cytoplasm] + SRPC[Cytoplasm] => S000004184-SRPC[Cytoplasm]	translocation from cytosol to ER (SRP-dependent)	Srp14p;Srp21p;Srp54p;Sec65p;Srp68p;Srp72p
S000004184-SRPC[Cytoplasm] + SRC[Endoplasmic Reticulum] => S000004184-SRPC-SRC[Cytoplasm]	translocation from cytosol to ER (SRP-dependent)	Srp101p;Srp102p
S000004184-SRPC-SRC[Cytoplasm] + 2 GTP[Cytoplasm] + SEC61C[Endoplasmic Reticulum] => S000004184-SRPC-SRC-SEC61C[Cytoplasm]	translocation from cytosol to ER (SRP-dependent)	Sec61p;Sbh1p;Sss1p;Ssh1p
S000004184-SRPC-SRC-SEC61C[Cytoplasm] => S000004184-SEC61C[Cytoplasm] + Srp14p[Cytoplasm] + Srp21p[Cytoplasm] + Srp68p[Cytoplasm] + Sec65p[Cytoplasm] + Srp72p[Cytoplasm] + scR1[Cytoplasm] + Srp54p[Cytoplasm] + Srp51p[Cytoplasm] + Srp52p[Cytoplasm] + 2 GDP[Cytoplasm] + 2 pi[Cytoplasm]	translocation from cytosol to ER (SRP-dependent)
S000004184-SEC61C[Cytoplasm] + SPC[Endoplasmic Reticulum] => S000004184[Endoplasmic Reticulum] + Sec61p[Endoplasmic Reticulum] + Sbh1p[Endoplasmic Reticulum] + Sss1p[Endoplasmic Reticulum] + Sec11p[Endoplasmic Reticulum] + Spc1p[Endoplasmic Reticulum] + Spc2p[Endoplasmic Reticulum] + Spc3p[Endoplasmic Reticulum] + sp[Cytoplasm]	translocation from cytosol to ER (SRP-dependent)	Sec11p;Spc1p;Spc2p;Spc3p
S000004184-G5[Endoplasmic Reticulum] + 1 Acyl-PI-GlcN-(man)4-(EtNP)3[Endoplasmic Reticulum] => S000004184-G6[Endoplasmic Reticulum]	GPI biosynthesis	Gaa1p;Gpi8p;Gpi16p;Gpi17p;Gab1p
S000004184-G6[Endoplasmic Reticulum]=> S000004184-G6[Endoplasmic Reticulum] + ?acyl[Endoplasmic Reticulum]	GPI biosynthesis	Bst1p
S000004184-SEC61C[Endoplasmic Reticulum] + 1 Dol-pp-GlcNAc(2)man(9)-Glc(3)[Endoplasmic Reticulum] + OSTC[Endoplasmic Reticulum] => S000004184-G1-SEC61C[Endoplasmic Reticulum] + 1 Dol-ppEndoplasmic Reticulum] + Ost1p[Endoplasmic Reticulum] + Ost2p[Endoplasmic Reticulum] + St3p[Endoplasmic Reticulum] + Ost4p[Endoplasmic Reticulum] + Ost5p[Endoplasmic Reticulum] + Ost6p[Endoplasmic Reticulum] + Stt3…	ER N-glycosylation	Stt3p;Ost1p;Wbp1p;OSt3p;Ost6p;Swp1p;Ost2p;Ost5p;Ost4p
S000004184-G1-SEC61C[Endoplasmic Reticulum] => S000004184-G1[Endoplasmic Reticulum] + SEC61C[Endoplasmic Reticulum]	protein folding
S000004184-G1[Endoplasmic Reticulum] => S000004184-G2[Endoplasmic Reticulum] + Glc[Endoplasmic Reticulum]	protein folding	Cwh41p
S000004184-G2[Endoplasmic Reticulum] => S000004184-G3[Endoplasmic Reticulum] + Glc[Endoplasmic Reticulum]	protein folding	Rot2p
S000004184-G3[Endoplasmic Reticulum] => S000004184-G4[Endoplasmic Reticulum] + Glc[Endoplasmic Reticulum]	protein folding	Rot2p
S000004184-G4[Endoplasmic Reticulum] => S000004184-G5[Endoplasmic Reticulum] + man[Endoplasmic Reticulum]	protein folding	Mns1p
S000004184-G5[Endoplasmic Reticulum] + 5 Kar2p[Endoplasmic Reticulum] + 5 ATP[Endoplasmic Reticulum] + 5 Scj1p[Endoplasmic Reticulum] + 5 Jem1p[Endoplasmic Reticulum] + 5 Sec63p[Endoplasmic Reticulum] => S000004184-G5-Kar2ATPcplx[Endoplasmic Reticulum]	protein folding	Kar2p;Scj1p;Jem1p;Sec63p
S000004184-G5-Kar2ATPcplx-[Endoplasmic Reticulum] => S000004184-F-G5-Kar2ADPcplx[Endoplasmic Reticulum] + 5 Scj1p[Endoplasmic Reticulum] + 5 Jem1p[Endoplasmic Reticulum] + 5 pi[Endoplasmic Reticulum] + Sec63p[Endoplasmic Reticulum]	protein folding
S000004184-F-G5-Kar2ADPcplx[Endoplasmic Reticulum] + 5 Sil1p[Endoplasmic Reticulum] + 5 Lhs1p[Endoplasmic Reticulum] + 5 ATP[Endoplasmic Reticulum] => S000004184-F-G5[Endoplasmic Reticulum] + 5 Sil1p[Endoplasmic Reticulum] + 5 Lhs1p[Endoplasmic Reticulum] + 5 ADP[Endoplasmic Reticulum] + 5 Kar2p[Endoplasmic Reticulum] protein folding	protein folding	Lhs1p;Sil1p
S000004184-7-G5[Endoplasmic Reticulum] + Sar1-GTP[Endoplasmic Reticulum] + Sec23-Sec24C[Cytoplasm] + Emp24p[Endoplasmic Reticulum] + Bet1p[Endoplasmic Reticulum] + Bos1p[Endoplasmic Reticulum] => S000004184-F-G7-COPII-pbud-cplx[Endoplasmic Reticulum]	COPII(for GPI-anchored cargo)	Sar1p;Sec23p;Sec24p;Bet1p;Bos1p;Emp24p
S000004184-F-G7orG5-COPII-pbud-cplx[Endoplasmic Reticulum] + Sec13-Sec31C[Cytoplasm] + Sec16p[Endoplasmic Reticulum] + Sed4p[Endoplasmic Reticulum] + Sec17p[Endoplasmic Reticulum] => S000004184-F-G5orG7-COPII[COPII]	COPII(common	Sec13p;Sec31p;Sec16p;Sed4p;Sec17p;Sec22p
S000004184-F-G7-COPII[COPII] + TRAPPIC[COPII] + Ypt1p[COPII] + GTP[COPII] => S000004184-F-G7[Golgi] + sar1-GDP[Cytoplasm] + pi[Cytoplasm] + Sec13-Sec31C[Cytoplasm] + Sec16p[Cytoplasm] + Sec23p[COPII] + Sec24p[COPII] + Emp24p[Endoplasmic Reticulum] + Bet3p[Cytoplasm] + Bet5p[Cytoplasm] + Trs20p[Cytoplasm] + Trs23p[Cytoplasm] + Trs31p[Cytoplasm] + Trs33p[Cytoplasm] + Bet1p[Endoplasmic Reticulum] + …	COPII(for GPI-anchored cargo)	Ypt1p;Uso1p;bug1p;Bet3p;Bet5p;Trs20p;Trs23p;Trs31p;Trs33p
S000004184-misf-G6[Cytoplasm] + 0.1 Ssm4p[Endoplasmic Reticulum] + 0.1 SSH1C[Endoplasmic Reticulum] + 0.1 AAAC[Cytoplasm] => S000004184-misf-G6-UBcplx[Cytoplasm]	ERADC	Sbh1p;Sss1p;Ssh1p;Ubx2p;Cdc48p;Ufd1p;Npl4p;Ssm4p
S000004184-misf-G6-UBcplx[Endoplasmic Reticulum] + 5 ATP[Cytoplasm] + 5 Ubiquitin[Cytoplasm] => S000004184-misf-G6-Ubiquitin[Cytoplasm] + 5 ADP[Cytoplasm] + 0.1 Ssm4p[Endoplasmic Reticulum] + 0.1 Sbh1p[Endoplasmic Reticulum] + 0.1 Sss1p[Endoplasmic Reticulum] + 0.1 Ssh1p[Endoplasmic Reticulum] + 0.1 Ubx2p[Endoplasmic Reticulum] + 0.1 Cdc48p[Cytoplasm] + 0.1 Ufd1p[Cytoplasm] + 0.1 Npl4p[Cytoplasm]…	ERADC	Ubiquitin
S000004184-misf-G6-Ubiquitin[Cytoplasm] + 0.1 Png1p[Cytoplasm] + 5 ATP[Cytoplasm] + 0.1 26sproteosome[Cytoplasm] + 5 H2O[Cytoplasm] => G6[Cytoplasm] + 5 Ubiquitin[Cytoplasm] + 5 ADP[Cytoplasm] + 5 pi[Cytoplasm] + 0.1 S000004184aa[Cytoplasm]	ERADC	Png1p; 26sproteosome
S000004184-G5orG7[Golgi] + GDP-man[Golgi] => S000004184-G9[Golgi] + GDP[Golgi]	Golgi processing	Och1p
S000004184-G9[Golgi] + 5 GDP-man[Golgi] => S000004184-G10[Golgi] + 5 GDP[Golgi]	Golgi processing	Mnn9p;Van1p
S000004184-G10[Golgi] + 40 GDP-man[Golgi] => S000004184-G11[Golgi] + 40 GDP[Golgi]	Golgi processing	Anp1p;Mnn9p;Mnn10p;Mnn11p;Hoc1p
S000004184-G15[Golgi] => S000004184-G16[Golgi] + aminoacid[Golgi]	Golgi processing	Kex1p;Kex2p;Ste13p
S000004184-M1[Golgi] + GTP[Cytoplasm] + clathrinC[Cytoplasm] + Arf1p[Cytoplasm] + EXOC[Cytoplasm] => S000004184-M1[cell membrane] + GDP[Golgi] + 2 Chc1p[Cytoplasm] + Clc1p[Cytoplasm] + Arf1p[Cytoplasm] + Sec3p[Cytoplasm] + Sec5p[Cytoplasm] + Sec6p[Cytoplasm] + Sec8p[Cytoplasm] + Sec10p[Cytoplasm] + Sec15p[Cytoplasm] + Exo70p[Cytoplasm] + Exo84p[Cytoplasm] + Sec4p[Cytoplasm]	LDSV(low density Secretory vesicle)	Arf1p;Sec3p;Sec5p;Sec6p;Sec8p;Sec10p;Sec15p;Exo70p;Exo84p;Sec4p;Chc1p;Clc1p
S000004110[Cytoplasm] + SRPC[Cytoplasm] => S000004110-SRPC[Cytoplasm]	translocation from cytosol to ER (SRP-dependent)	Srp14p;Srp21p;Srp54p;Sec65p;Srp68p;Srp72p
S000004110-SRPC[Cytoplasm] + SRC[Endoplasmic Reticulum] => S000004110-SRPC-SRC[Cytoplasm]	translocation from cytosol to ER (SRP-dependent)	Srp101p;Srp102p
S000004110-SRPC-SRC[Cytoplasm] + 2 GTP[Cytoplasm] + SEC61C[Endoplasmic Reticulum] => S000004110-SRPC-SRC-SEC61C[Cytoplasm]	translocation from cytosol to ER (SRP-dependent)	Sec61p;Sbh1p;Sss1p;Ssh1p
S000004110-SRPC-SRC-SEC61C[Cytoplasm] => S000004110-SEC61C[Cytoplasm] + Srp14p[Cytoplasm] + Srp21p[Cytoplasm] + Srp68p[Cytoplasm] + Sec65p[Cytoplasm] + Srp72p[Cytoplasm] + scR1[Cytoplasm] + Srp54p[Cytoplasm] + Srp51p[Cytoplasm] + Srp52p[Cytoplasm] + 2 GDP[Cytoplasm] + 2 pi[Cytoplasm]	translocation from cytosol to ER (SRP-dependent)
S000004110-SEC61C[Cytoplasm] + SPC[Endoplasmic Reticulum] => S000004110[Endoplasmic Reticulum] + Sec61p[Endoplasmic Reticulum] + Sbh1p[Endoplasmic Reticulum] + Sss1p[Endoplasmic Reticulum] + Sec11p[Endoplasmic Reticulum] + Spc1p[Endoplasmic Reticulum] + Spc2p[Endoplasmic Reticulum] + Spc3p[Endoplasmic Reticulum] + sp[Cytoplasm]	translocation from cytosol to ER (SRP-dependent)	Sec11p;Spc1p;Spc2p;Spc3p
S000004110-G5[Endoplasmic Reticulum] + 1 Acyl-PI-GlcN-(man)4-(EtNP)3[Endoplasmic Reticulum] => S000004110-G6[Endoplasmic Reticulum]	GPI biosynthesis	Gaa1p;Gpi8p;Gpi16p;Gpi17p;Gab1p
S000004110-G6[Endoplasmic Reticulum]=> S000004110-G6[Endoplasmic Reticulum] + ?acyl[Endoplasmic Reticulum]	GPI biosynthesis	Bst1p
S000004110-SEC61C[Endoplasmic Reticulum] + 10 Dol-pp-GlcNAc(2)man(9)-Glc(3)[Endoplasmic Reticulum] + OSTC[Endoplasmic Reticulum] => S000004110-G1-SEC61C[Endoplasmic Reticulum] + 10 Dol-ppEndoplasmic Reticulum] + Ost1p[Endoplasmic Reticulum] + Ost2p[Endoplasmic Reticulum] + St3p[Endoplasmic Reticulum] + Ost4p[Endoplasmic Reticulum] + Ost5p[Endoplasmic Reticulum] + Ost6p[Endoplasmic Reticulum] + St…	ER N-glycosylation	Stt3p;Ost1p;Wbp1p;OSt3p;Ost6p;Swp1p;Ost2p;Ost5p;Ost4p
S000004110-G1-SEC61C[Endoplasmic Reticulum] => S000004110-G1[Endoplasmic Reticulum] + SEC61C[Endoplasmic Reticulum]	protein folding
S000004110-G1[Endoplasmic Reticulum] => S000004110-G2[Endoplasmic Reticulum] + Glc[Endoplasmic Reticulum]	protein folding	Cwh41p
S000004110-G2[Endoplasmic Reticulum] => S000004110-G3[Endoplasmic Reticulum] + Glc[Endoplasmic Reticulum]	protein folding	Rot2p
S000004110-G3[Endoplasmic Reticulum] => S000004110-G4[Endoplasmic Reticulum] + Glc[Endoplasmic Reticulum]	protein folding	Rot2p
S000004110-G4[Endoplasmic Reticulum] => S000004110-G5[Endoplasmic Reticulum] + man[Endoplasmic Reticulum]	protein folding	Mns1p
S000004110-G5[Endoplasmic Reticulum] + 5 Kar2p[Endoplasmic Reticulum] + 5 ATP[Endoplasmic Reticulum] + 5 Scj1p[Endoplasmic Reticulum] + 5 Jem1p[Endoplasmic Reticulum] + 5 Sec63p[Endoplasmic Reticulum] => S000004110-G5-Kar2ATPcplx[Endoplasmic Reticulum]	protein folding	Kar2p;Scj1p;Jem1p;Sec63p
S000004110-G5-Kar2ATPcplx-[Endoplasmic Reticulum] => S000004110-F-G5-Kar2ADPcplx[Endoplasmic Reticulum] + 5 Scj1p[Endoplasmic Reticulum] + 5 Jem1p[Endoplasmic Reticulum] + 5 pi[Endoplasmic Reticulum] + Sec63p[Endoplasmic Reticulum]	protein folding
S000004110-F-G5-Kar2ADPcplx[Endoplasmic Reticulum] + 5 Sil1p[Endoplasmic Reticulum] + 5 Lhs1p[Endoplasmic Reticulum] + 5 ATP[Endoplasmic Reticulum] => S000004110-F-G5[Endoplasmic Reticulum] + 5 Sil1p[Endoplasmic Reticulum] + 5 Lhs1p[Endoplasmic Reticulum] + 5 ADP[Endoplasmic Reticulum] + 5 Kar2p[Endoplasmic Reticulum] protein folding	protein folding	Lhs1p;Sil1p
S000004110-7-G5[Endoplasmic Reticulum] + Sar1-GTP[Endoplasmic Reticulum] + Sec23-Sec24C[Cytoplasm] + Emp24p[Endoplasmic Reticulum] + Bet1p[Endoplasmic Reticulum] + Bos1p[Endoplasmic Reticulum] => S000004110-F-G7-COPII-pbud-cplx[Endoplasmic Reticulum]	COPII(for GPI-anchored cargo)	Sar1p;Sec23p;Sec24p;Bet1p;Bos1p;Emp24p
S000004110-F-G7orG5-COPII-pbud-cplx[Endoplasmic Reticulum] + Sec13-Sec31C[Cytoplasm] + Sec16p[Endoplasmic Reticulum] + Sed4p[Endoplasmic Reticulum] + Sec17p[Endoplasmic Reticulum] => S000004110-F-G5orG7-COPII[COPII]	COPII(common	Sec13p;Sec31p;Sec16p;Sed4p;Sec17p;Sec22p
S000004110-F-G7-COPII[COPII] + TRAPPIC[COPII] + Ypt1p[COPII] + GTP[COPII] => S000004110-F-G7[Golgi] + sar1-GDP[Cytoplasm] + pi[Cytoplasm] + Sec13-Sec31C[Cytoplasm] + Sec16p[Cytoplasm] + Sec23p[COPII] + Sec24p[COPII] + Emp24p[Endoplasmic Reticulum] + Bet3p[Cytoplasm] + Bet5p[Cytoplasm] + Trs20p[Cytoplasm] + Trs23p[Cytoplasm] + Trs31p[Cytoplasm] + Trs33p[Cytoplasm] + Bet1p[Endoplasmic Reticulum] + …	COPII(for GPI-anchored cargo)	Ypt1p;Uso1p;bug1p;Bet3p;Bet5p;Trs20p;Trs23p;Trs31p;Trs33p
S000004110-misf-G6[Cytoplasm] + 0.1 Ssm4p[Endoplasmic Reticulum] + 0.1 SSH1C[Endoplasmic Reticulum] + 0.1 AAAC[Cytoplasm] => S000004110-misf-G6-UBcplx[Cytoplasm]	ERADC	Sbh1p;Sss1p;Ssh1p;Ubx2p;Cdc48p;Ufd1p;Npl4p;Ssm4p
S000004110-misf-G6-UBcplx[Endoplasmic Reticulum] + 5 ATP[Cytoplasm] + 5 Ubiquitin[Cytoplasm] => S000004110-misf-G6-Ubiquitin[Cytoplasm] + 5 ADP[Cytoplasm] + 0.1 Ssm4p[Endoplasmic Reticulum] + 0.1 Sbh1p[Endoplasmic Reticulum] + 0.1 Sss1p[Endoplasmic Reticulum] + 0.1 Ssh1p[Endoplasmic Reticulum] + 0.1 Ubx2p[Endoplasmic Reticulum] + 0.1 Cdc48p[Cytoplasm] + 0.1 Ufd1p[Cytoplasm] + 0.1 Npl4p[Cytoplasm]…	ERADC	Ubiquitin
S000004110-misf-G6-Ubiquitin[Cytoplasm] + 0.1 Png1p[Cytoplasm] + 5 ATP[Cytoplasm] + 0.1 26sproteosome[Cytoplasm] + 5 H2O[Cytoplasm] => G6[Cytoplasm] + 5 Ubiquitin[Cytoplasm] + 5 ADP[Cytoplasm] + 5 pi[Cytoplasm] + 0.1 S000004110aa[Cytoplasm]	ERADC	Png1p; 26sproteosome
S000004110-G5orG7[Golgi] + GDP-man[Golgi] => S000004110-G9[Golgi] + GDP[Golgi]	Golgi processing	Och1p
S000004110-G9[Golgi] + 5 GDP-man[Golgi] => S000004110-G10[Golgi] + 5 GDP[Golgi]	Golgi processing	Mnn9p;Van1p
S000004110-G10[Golgi] + 40 GDP-man[Golgi] => S000004110-G11[Golgi] + 40 GDP[Golgi]	Golgi processing	Anp1p;Mnn9p;Mnn10p;Mnn11p;Hoc1p
S000004110-G15[Golgi] => S000004110-G16[Golgi] + aminoacid[Golgi]	Golgi processing	Kex1p;Kex2p;Ste13p
S000004110-M1[Golgi] + GTP[Cytoplasm] + clathrinC[Cytoplasm] + Arf1p[Cytoplasm] + EXOC[Cytoplasm] => S000004110-M1[cell membrane] + GDP[Golgi] + 2 Chc1p[Cytoplasm] + Clc1p[Cytoplasm] + Arf1p[Cytoplasm] + Sec3p[Cytoplasm] + Sec5p[Cytoplasm] + Sec6p[Cytoplasm] + Sec8p[Cytoplasm] + Sec10p[Cytoplasm] + Sec15p[Cytoplasm] + Exo70p[Cytoplasm] + Exo84p[Cytoplasm] + Sec4p[Cytoplasm]	LDSV(low density Secretory vesicle)	Arf1p;Sec3p;Sec5p;Sec6p;Sec8p;Sec10p;Sec15p;Exo70p;Exo84p;Sec4p;Chc1p;Clc1p
S000004111[Cytoplasm] + SRPC[Cytoplasm] => S000004111-SRPC[Cytoplasm]	translocation from cytosol to ER (SRP-dependent)	Srp14p;Srp21p;Srp54p;Sec65p;Srp68p;Srp72p
S000004111-SRPC[Cytoplasm] + SRC[Endoplasmic Reticulum] => S000004111-SRPC-SRC[Cytoplasm]	translocation from cytosol to ER (SRP-dependent)	Srp101p;Srp102p
S000004111-SRPC-SRC[Cytoplasm] + 2 GTP[Cytoplasm] + SEC61C[Endoplasmic Reticulum] => S000004111-SRPC-SRC-SEC61C[Cytoplasm]	translocation from cytosol to ER (SRP-dependent)	Sec61p;Sbh1p;Sss1p;Ssh1p
S000004111-SRPC-SRC-SEC61C[Cytoplasm] => S000004111-SEC61C[Cytoplasm] + Srp14p[Cytoplasm] + Srp21p[Cytoplasm] + Srp68p[Cytoplasm] + Sec65p[Cytoplasm] + Srp72p[Cytoplasm] + scR1[Cytoplasm] + Srp54p[Cytoplasm] + Srp51p[Cytoplasm] + Srp52p[Cytoplasm] + 2 GDP[Cytoplasm] + 2 pi[Cytoplasm]	translocation from cytosol to ER (SRP-dependent)
S000004111-SEC61C[Cytoplasm] + SPC[Endoplasmic Reticulum] => S000004111[Endoplasmic Reticulum] + Sec61p[Endoplasmic Reticulum] + Sbh1p[Endoplasmic Reticulum] + Sss1p[Endoplasmic Reticulum] + Sec11p[Endoplasmic Reticulum] + Spc1p[Endoplasmic Reticulum] + Spc2p[Endoplasmic Reticulum] + Spc3p[Endoplasmic Reticulum] + sp[Cytoplasm]	translocation from cytosol to ER (SRP-dependent)	Sec11p;Spc1p;Spc2p;Spc3p
S000004111-G5[Endoplasmic Reticulum] + 1 Acyl-PI-GlcN-(man)4-(EtNP)3[Endoplasmic Reticulum] => S000004111-G6[Endoplasmic Reticulum]	GPI biosynthesis	Gaa1p;Gpi8p;Gpi16p;Gpi17p;Gab1p
S000004111-G6[Endoplasmic Reticulum]=> S000004111-G6[Endoplasmic Reticulum] + ?acyl[Endoplasmic Reticulum]	GPI biosynthesis	Bst1p
S000004111-SEC61C[Endoplasmic Reticulum] + 11 Dol-pp-GlcNAc(2)man(9)-Glc(3)[Endoplasmic Reticulum] + OSTC[Endoplasmic Reticulum] => S000004111-G1-SEC61C[Endoplasmic Reticulum] + 11 Dol-ppEndoplasmic Reticulum] + Ost1p[Endoplasmic Reticulum] + Ost2p[Endoplasmic Reticulum] + St3p[Endoplasmic Reticulum] + Ost4p[Endoplasmic Reticulum] + Ost5p[Endoplasmic Reticulum] + Ost6p[Endoplasmic Reticulum] + St…	ER N-glycosylation	Stt3p;Ost1p;Wbp1p;OSt3p;Ost6p;Swp1p;Ost2p;Ost5p;Ost4p
S000004111-G1-SEC61C[Endoplasmic Reticulum] => S000004111-G1[Endoplasmic Reticulum] + SEC61C[Endoplasmic Reticulum]	protein folding
S000004111-G1[Endoplasmic Reticulum] => S000004111-G2[Endoplasmic Reticulum] + Glc[Endoplasmic Reticulum]	protein folding	Cwh41p
S000004111-G2[Endoplasmic Reticulum] => S000004111-G3[Endoplasmic Reticulum] + Glc[Endoplasmic Reticulum]	protein folding	Rot2p
S000004111-G3[Endoplasmic Reticulum] => S000004111-G4[Endoplasmic Reticulum] + Glc[Endoplasmic Reticulum]	protein folding	Rot2p
S000004111-G4[Endoplasmic Reticulum] => S000004111-G5[Endoplasmic Reticulum] + man[Endoplasmic Reticulum]	protein folding	Mns1p
S000004111-G5[Endoplasmic Reticulum] + 5 Kar2p[Endoplasmic Reticulum] + 5 ATP[Endoplasmic Reticulum] + 5 Scj1p[Endoplasmic Reticulum] + 5 Jem1p[Endoplasmic Reticulum] + 5 Sec63p[Endoplasmic Reticulum] => S000004111-G5-Kar2ATPcplx[Endoplasmic Reticulum]	protein folding	Kar2p;Scj1p;Jem1p;Sec63p
S000004111-G5-Kar2ATPcplx-[Endoplasmic Reticulum] => S000004111-F-G5-Kar2ADPcplx[Endoplasmic Reticulum] + 5 Scj1p[Endoplasmic Reticulum] + 5 Jem1p[Endoplasmic Reticulum] + 5 pi[Endoplasmic Reticulum] + Sec63p[Endoplasmic Reticulum]	protein folding
S000004111-F-G5-Kar2ADPcplx[Endoplasmic Reticulum] + 5 Sil1p[Endoplasmic Reticulum] + 5 Lhs1p[Endoplasmic Reticulum] + 5 ATP[Endoplasmic Reticulum] => S000004111-F-G5[Endoplasmic Reticulum] + 5 Sil1p[Endoplasmic Reticulum] + 5 Lhs1p[Endoplasmic Reticulum] + 5 ADP[Endoplasmic Reticulum] + 5 Kar2p[Endoplasmic Reticulum] protein folding	protein folding	Lhs1p;Sil1p
S000004111-7-G5[Endoplasmic Reticulum] + Sar1-GTP[Endoplasmic Reticulum] + Sec23-Sec24C[Cytoplasm] + Emp24p[Endoplasmic Reticulum] + Bet1p[Endoplasmic Reticulum] + Bos1p[Endoplasmic Reticulum] => S000004111-F-G7-COPII-pbud-cplx[Endoplasmic Reticulum]	COPII(for GPI-anchored cargo)	Sar1p;Sec23p;Sec24p;Bet1p;Bos1p;Emp24p
S000004111-F-G7orG5-COPII-pbud-cplx[Endoplasmic Reticulum] + Sec13-Sec31C[Cytoplasm] + Sec16p[Endoplasmic Reticulum] + Sed4p[Endoplasmic Reticulum] + Sec17p[Endoplasmic Reticulum] => S000004111-F-G5orG7-COPII[COPII]	COPII(common	Sec13p;Sec31p;Sec16p;Sed4p;Sec17p;Sec22p
S000004111-F-G7-COPII[COPII] + TRAPPIC[COPII] + Ypt1p[COPII] + GTP[COPII] => S000004111-F-G7[Golgi] + sar1-GDP[Cytoplasm] + pi[Cytoplasm] + Sec13-Sec31C[Cytoplasm] + Sec16p[Cytoplasm] + Sec23p[COPII] + Sec24p[COPII] + Emp24p[Endoplasmic Reticulum] + Bet3p[Cytoplasm] + Bet5p[Cytoplasm] + Trs20p[Cytoplasm] + Trs23p[Cytoplasm] + Trs31p[Cytoplasm] + Trs33p[Cytoplasm] + Bet1p[Endoplasmic Reticulum] + …	COPII(for GPI-anchored cargo)	Ypt1p;Uso1p;bug1p;Bet3p;Bet5p;Trs20p;Trs23p;Trs31p;Trs33p
S000004111-misf-G6[Cytoplasm] + 0.1 Ssm4p[Endoplasmic Reticulum] + 0.1 SSH1C[Endoplasmic Reticulum] + 0.1 AAAC[Cytoplasm] => S000004111-misf-G6-UBcplx[Cytoplasm]	ERADC	Sbh1p;Sss1p;Ssh1p;Ubx2p;Cdc48p;Ufd1p;Npl4p;Ssm4p
S000004111-misf-G6-UBcplx[Endoplasmic Reticulum] + 5 ATP[Cytoplasm] + 5 Ubiquitin[Cytoplasm] => S000004111-misf-G6-Ubiquitin[Cytoplasm] + 5 ADP[Cytoplasm] + 0.1 Ssm4p[Endoplasmic Reticulum] + 0.1 Sbh1p[Endoplasmic Reticulum] + 0.1 Sss1p[Endoplasmic Reticulum] + 0.1 Ssh1p[Endoplasmic Reticulum] + 0.1 Ubx2p[Endoplasmic Reticulum] + 0.1 Cdc48p[Cytoplasm] + 0.1 Ufd1p[Cytoplasm] + 0.1 Npl4p[Cytoplasm]…	ERADC	Ubiquitin
S000004111-misf-G6-Ubiquitin[Cytoplasm] + 0.1 Png1p[Cytoplasm] + 5 ATP[Cytoplasm] + 0.1 26sproteosome[Cytoplasm] + 5 H2O[Cytoplasm] => G6[Cytoplasm] + 5 Ubiquitin[Cytoplasm] + 5 ADP[Cytoplasm] + 5 pi[Cytoplasm] + 0.1 S000004111aa[Cytoplasm]	ERADC	Png1p; 26sproteosome
S000004111-G5orG7[Golgi] + GDP-man[Golgi] => S000004111-G9[Golgi] + GDP[Golgi]	Golgi processing	Och1p
S000004111-G9[Golgi] + 5 GDP-man[Golgi] => S000004111-G10[Golgi] + 5 GDP[Golgi]	Golgi processing	Mnn9p;Van1p
S000004111-G10[Golgi] + 40 GDP-man[Golgi] => S000004111-G11[Golgi] + 40 GDP[Golgi]	Golgi processing	Anp1p;Mnn9p;Mnn10p;Mnn11p;Hoc1p
S000004111-G15[Golgi] => S000004111-G16[Golgi] + aminoacid[Golgi]	Golgi processing	Kex1p;Kex2p;Ste13p
S000004111-M1[Golgi] + GTP[Cytoplasm] + clathrinC[Cytoplasm] + Arf1p[Cytoplasm] + EXOC[Cytoplasm] => S000004111-M1[cell membrane] + GDP[Golgi] + 2 Chc1p[Cytoplasm] + Clc1p[Cytoplasm] + Arf1p[Cytoplasm] + Sec3p[Cytoplasm] + Sec5p[Cytoplasm] + Sec6p[Cytoplasm] + Sec8p[Cytoplasm] + Sec10p[Cytoplasm] + Sec15p[Cytoplasm] + Exo70p[Cytoplasm] + Exo84p[Cytoplasm] + Sec4p[Cytoplasm]	LDSV(low density Secretory vesicle)	Arf1p;Sec3p;Sec5p;Sec6p;Sec8p;Sec10p;Sec15p;Exo70p;Exo84p;Sec4p;Chc1p;Clc1p
S000005343[Cytoplasm] + SRPC[Cytoplasm] => S000005343-SRPC[Cytoplasm]	translocation from cytosol to ER (SRP-dependent)	Srp14p;Srp21p;Srp54p;Sec65p;Srp68p;Srp72p
S000005343-SRPC[Cytoplasm] + SRC[Endoplasmic Reticulum] => S000005343-SRPC-SRC[Cytoplasm]	translocation from cytosol to ER (SRP-dependent)	Srp101p;Srp102p
S000005343-SRPC-SRC[Cytoplasm] + 2 GTP[Cytoplasm] + SEC61C[Endoplasmic Reticulum] => S000005343-SRPC-SRC-SEC61C[Cytoplasm]	translocation from cytosol to ER (SRP-dependent)	Sec61p;Sbh1p;Sss1p;Ssh1p
S000005343-SRPC-SRC-SEC61C[Cytoplasm] => S000005343-SEC61C[Cytoplasm] + Srp14p[Cytoplasm] + Srp21p[Cytoplasm] + Srp68p[Cytoplasm] + Sec65p[Cytoplasm] + Srp72p[Cytoplasm] + scR1[Cytoplasm] + Srp54p[Cytoplasm] + Srp51p[Cytoplasm] + Srp52p[Cytoplasm] + 2 GDP[Cytoplasm] + 2 pi[Cytoplasm]	translocation from cytosol to ER (SRP-dependent)
S000005343-SEC61C[Cytoplasm] + SPC[Endoplasmic Reticulum] => S000005343[Endoplasmic Reticulum] + Sec61p[Endoplasmic Reticulum] + Sbh1p[Endoplasmic Reticulum] + Sss1p[Endoplasmic Reticulum] + Sec11p[Endoplasmic Reticulum] + Spc1p[Endoplasmic Reticulum] + Spc2p[Endoplasmic Reticulum] + Spc3p[Endoplasmic Reticulum] + sp[Cytoplasm]	translocation from cytosol to ER (SRP-dependent)	Sec11p;Spc1p;Spc2p;Spc3p
S000005343-SEC61C[Endoplasmic Reticulum] + 6 Dol-pp-GlcNAc(2)man(9)-Glc(3)[Endoplasmic Reticulum] + OSTC[Endoplasmic Reticulum] => S000005343-G1-SEC61C[Endoplasmic Reticulum] + 6 Dol-ppEndoplasmic Reticulum] + Ost1p[Endoplasmic Reticulum] + Ost2p[Endoplasmic Reticulum] + St3p[Endoplasmic Reticulum] + Ost4p[Endoplasmic Reticulum] + Ost5p[Endoplasmic Reticulum] + Ost6p[Endoplasmic Reticulum] + Stt3…	ER N-glycosylation	Stt3p;Ost1p;Wbp1p;OSt3p;Ost6p;Swp1p;Ost2p;Ost5p;Ost4p
S000005343-G1-SEC61C[Endoplasmic Reticulum] => S000005343-G1[Endoplasmic Reticulum] + SEC61C[Endoplasmic Reticulum]	protein folding
S000005343-G1[Endoplasmic Reticulum] => S000005343-G2[Endoplasmic Reticulum] + Glc[Endoplasmic Reticulum]	protein folding	Cwh41p
S000005343-G2[Endoplasmic Reticulum] => S000005343-G3[Endoplasmic Reticulum] + Glc[Endoplasmic Reticulum]	protein folding	Rot2p
S000005343-G3[Endoplasmic Reticulum] => S000005343-G4[Endoplasmic Reticulum] + Glc[Endoplasmic Reticulum]	protein folding	Rot2p
S000005343-G4[Endoplasmic Reticulum] => S000005343-G5[Endoplasmic Reticulum] + man[Endoplasmic Reticulum]	protein folding	Mns1p
S000005343-G5[Endoplasmic Reticulum] + 5 Kar2p[Endoplasmic Reticulum] + 5 ATP[Endoplasmic Reticulum] + 5 Scj1p[Endoplasmic Reticulum] + 5 Jem1p[Endoplasmic Reticulum] + 5 Sec63p[Endoplasmic Reticulum] => S000005343-G5-Kar2ATPcplx[Endoplasmic Reticulum]	protein folding	Kar2p;Scj1p;Jem1p;Sec63p
S000005343-G5-Kar2ATPcplx-[Endoplasmic Reticulum] => S000005343-F-G5-Kar2ADPcplx[Endoplasmic Reticulum] + 5 Scj1p[Endoplasmic Reticulum] + 5 Jem1p[Endoplasmic Reticulum] + 5 pi[Endoplasmic Reticulum] + Sec63p[Endoplasmic Reticulum]	protein folding
S000005343-F-G5-Kar2ADPcplx[Endoplasmic Reticulum] + 5 Sil1p[Endoplasmic Reticulum] + 5 Lhs1p[Endoplasmic Reticulum] + 5 ATP[Endoplasmic Reticulum] => S000005343-F-G5[Endoplasmic Reticulum] + 5 Sil1p[Endoplasmic Reticulum] + 5 Lhs1p[Endoplasmic Reticulum] + 5 ADP[Endoplasmic Reticulum] + 5 Kar2p[Endoplasmic Reticulum] protein folding	protein folding	Lhs1p;Sil1p
S000005343-F-G5[Endoplasmic Reticulum] + Sar1-GTP[Endoplasmic Reticulum] + Sec23-Sec24C[Cytoplasm] + Bet1p[Endoplasmic Reticulum] + Bos1p[Endoplasmic Reticulum] => S000005343-F-G5-COPII-pbud-cplx[Endoplasmic Reticulum]	COPII (for transmembrane cargo)	Sar1p;Sec23p;Sec24p;Bet1p;Bos1p
S000005343-F-G7orG5-COPII-pbud-cplx[Endoplasmic Reticulum] + Sec13-Sec31C[Cytoplasm] + Sec16p[Endoplasmic Reticulum] + Sed4p[Endoplasmic Reticulum] + Sec17p[Endoplasmic Reticulum] => S000005343-F-G5orG7-COPII[COPII]	COPII(common	Sec13p;Sec31p;Sec16p;Sed4p;Sec17p;Sec22p
S000005343-F-G5-COPII[COPII] + TRAPPIC[COPII] + Ypt1p[COPII] + GTP[COPII] => S000005343-F-G5[Golgi] + sar1-GDP[Cytoplasm] + pi[Cytoplasm] + Sec13-Sec31C[Cytoplasm] + Sec16p[Cytoplasm] + Sec12-Sed24C[Cytoplasm] + Bet3p[Cytoplasm] + Bet5p[Cytoplasm] + Trs20p[Cytoplasm] + Trs23p[Cytoplasm] + Trs31p[Cytoplasm] + Trs33p[Cytoplasm] + Bet1p[Endoplasmic Reticulum] + Bos1p[Endoplasmic Reticulum]	COPII (for transmembrane cargo)	Ypt1p;Uso1p;bug1p;Bet3p;Bet5p;Trs20p;Trs23p;Trs31p;Trs33p
S000005343-misf-G8-cplx[Endoplasmic Reticulum] + 0.1 Hrd1p[Endoplasmic Reticulum] => S000005343-misf-G8-HRDcplx[Endoplasmic Reticulum]	ERADM	Hrd1p
S000005343-misf-G8-HRDcplx[Endoplasmic Reticulum] + 0.1 Ubc7p[Cytoplasm] + 0.1 Cue1p[Cytoplasm] + 0.1 AAAC[Cytoplasm] => S000005343-misf-G8-UBcplx[Endoplasmic Reticulum] + 0.1 Hrd1p[Endoplasmic Reticulum] + 0.1 Usa1p[Endoplasmic Reticulum] + 0.1 Der1p[Endoplasmic Reticulum]	ERADM	Ubc7p; Cue1p;Usa1p; Der1p
S000005343-misf-G8-UBcplx[Endoplasmic Reticulum] + 5 ATP[Cytoplasm] + 5 Ubiquitin[Cytoplasm] => S000005343-misf-G8-Ubiquitin[Cytoplasm] + Ubc7p[Cytoplasm] + 0.1 Cue1p[Cytoplasm] + 0.1 Ubx2p[Endoplasmic Reticulum] + 0.1 Cdc48p[Cytoplasm] + 0.1 Ufd1p[Cytoplasm] + 0.1 Npl4p[Cytoplasm] + 0.1 Usa1p[Endoplasmic Reticulum] + 0.1 Der1p[Endoplasmic Reticulum] + 5 AMP[Cytoplasm] + 5 ppi[Cytoplasm]	ERADM	Ubx2p; Cdc48p; Ufd1p;Npl4p;Ubiquitin
S000005343-misf-G8-Ubiquitin[Cytoplasm] + 0.1 Dsk2p[Cytoplasm] + 0.1 Rad23p[Cytoplasm] + 0.1 Png1p[Cytoplasm] + 5 ATP[Cytoplasm] + 0.1 26sproteosome[Cytoplasm] + 5 H2O[Cytoplasm] => G8[Cytoplasm] + 5 Ubiquitin[Cytoplasm] + 5 ADP[Cytoplasm] + 5 pi[Cytoplasm] + S000005343aa[Cytoplasm]	ERADM	Png1p;26sproteosome
S000005343-G5orG7[Golgi] + GDP-man[Golgi] => S000005343-G9[Golgi] + GDP[Golgi]	Golgi processing	Och1p
S000005343-G9[Golgi] + 5 GDP-man[Golgi] => S000005343-G10[Golgi] + 5 GDP[Golgi]	Golgi processing	Mnn9p;Van1p
S000005343-G10[Golgi] + 40 GDP-man[Golgi] => S000005343-G11[Golgi] + 40 GDP[Golgi]	Golgi processing	Anp1p;Mnn9p;Mnn10p;Mnn11p;Hoc1p
S000005343-G15[Golgi] => S000005343-G16[Golgi] + aminoacid[Golgi]	Golgi processing	Kex1p;Kex2p;Ste13p
S000005343-M1[Golgi] + GTP[Cytoplasm] + clathrinC[Cytoplasm] + Arf1p[Cytoplasm] + EXOC[Cytoplasm] => S000005343-M1[cell membrane] + GDP[Golgi] + 2 Chc1p[Cytoplasm] + Clc1p[Cytoplasm] + Arf1p[Cytoplasm] + Sec3p[Cytoplasm] + Sec5p[Cytoplasm] + Sec6p[Cytoplasm] + Sec8p[Cytoplasm] + Sec10p[Cytoplasm] + Sec15p[Cytoplasm] + Exo70p[Cytoplasm] + Exo84p[Cytoplasm] + Sec4p[Cytoplasm]	LDSV(low density Secretory vesicle)	Arf1p;Sec3p;Sec5p;Sec6p;Sec8p;Sec10p;Sec15p;Exo70p;Exo84p;Sec4p;Chc1p;Clc1p
S000005911[Cytoplasm] + SRPC[Cytoplasm] => S000005911-SRPC[Cytoplasm]	translocation from cytosol to ER (SRP-dependent)	Srp14p;Srp21p;Srp54p;Sec65p;Srp68p;Srp72p
S000005911-SRPC[Cytoplasm] + SRC[Endoplasmic Reticulum] => S000005911-SRPC-SRC[Cytoplasm]	translocation from cytosol to ER (SRP-dependent)	Srp101p;Srp102p
S000005911-SRPC-SRC[Cytoplasm] + 2 GTP[Cytoplasm] + SEC61C[Endoplasmic Reticulum] => S000005911-SRPC-SRC-SEC61C[Cytoplasm]	translocation from cytosol to ER (SRP-dependent)	Sec61p;Sbh1p;Sss1p;Ssh1p
S000005911-SRPC-SRC-SEC61C[Cytoplasm] => S000005911-SEC61C[Cytoplasm] + Srp14p[Cytoplasm] + Srp21p[Cytoplasm] + Srp68p[Cytoplasm] + Sec65p[Cytoplasm] + Srp72p[Cytoplasm] + scR1[Cytoplasm] + Srp54p[Cytoplasm] + Srp51p[Cytoplasm] + Srp52p[Cytoplasm] + 2 GDP[Cytoplasm] + 2 pi[Cytoplasm]	translocation from cytosol to ER (SRP-dependent)
S000005911-SEC61C[Cytoplasm] + SPC[Endoplasmic Reticulum] => S000005911[Endoplasmic Reticulum] + Sec61p[Endoplasmic Reticulum] + Sbh1p[Endoplasmic Reticulum] + Sss1p[Endoplasmic Reticulum] + Sec11p[Endoplasmic Reticulum] + Spc1p[Endoplasmic Reticulum] + Spc2p[Endoplasmic Reticulum] + Spc3p[Endoplasmic Reticulum] + sp[Cytoplasm]	translocation from cytosol to ER (SRP-dependent)	Sec11p;Spc1p;Spc2p;Spc3p
S000005911-SEC61C[Endoplasmic Reticulum] + 1 Dol-pp-GlcNAc(2)man(9)-Glc(3)[Endoplasmic Reticulum] + OSTC[Endoplasmic Reticulum] => S000005911-G1-SEC61C[Endoplasmic Reticulum] + 1 Dol-ppEndoplasmic Reticulum] + Ost1p[Endoplasmic Reticulum] + Ost2p[Endoplasmic Reticulum] + St3p[Endoplasmic Reticulum] + Ost4p[Endoplasmic Reticulum] + Ost5p[Endoplasmic Reticulum] + Ost6p[Endoplasmic Reticulum] + Stt3…	ER N-glycosylation	Stt3p;Ost1p;Wbp1p;OSt3p;Ost6p;Swp1p;Ost2p;Ost5p;Ost4p
S000005911-G1-SEC61C[Endoplasmic Reticulum] => S000005911-G1[Endoplasmic Reticulum] + SEC61C[Endoplasmic Reticulum]	protein folding
S000005911-G1[Endoplasmic Reticulum] => S000005911-G2[Endoplasmic Reticulum] + Glc[Endoplasmic Reticulum]	protein folding	Cwh41p
S000005911-G2[Endoplasmic Reticulum] => S000005911-G3[Endoplasmic Reticulum] + Glc[Endoplasmic Reticulum]	protein folding	Rot2p
S000005911-G3[Endoplasmic Reticulum] => S000005911-G4[Endoplasmic Reticulum] + Glc[Endoplasmic Reticulum]	protein folding	Rot2p
S000005911-G4[Endoplasmic Reticulum] => S000005911-G5[Endoplasmic Reticulum] + man[Endoplasmic Reticulum]	protein folding	Mns1p
S000005911-G5[Endoplasmic Reticulum] + 5 Kar2p[Endoplasmic Reticulum] + 5 ATP[Endoplasmic Reticulum] + 5 Scj1p[Endoplasmic Reticulum] + 5 Jem1p[Endoplasmic Reticulum] + 5 Sec63p[Endoplasmic Reticulum] => S000005911-G5-Kar2ATPcplx[Endoplasmic Reticulum]	protein folding	Kar2p;Scj1p;Jem1p;Sec63p
S000005911-G5-Kar2ATPcplx-[Endoplasmic Reticulum] => S000005911-F-G5-Kar2ADPcplx[Endoplasmic Reticulum] + 5 Scj1p[Endoplasmic Reticulum] + 5 Jem1p[Endoplasmic Reticulum] + 5 pi[Endoplasmic Reticulum] + Sec63p[Endoplasmic Reticulum]	protein folding
S000005911-F-G5-Kar2ADPcplx[Endoplasmic Reticulum] + 5 Sil1p[Endoplasmic Reticulum] + 5 Lhs1p[Endoplasmic Reticulum] + 5 ATP[Endoplasmic Reticulum] => S000005911-F-G5[Endoplasmic Reticulum] + 5 Sil1p[Endoplasmic Reticulum] + 5 Lhs1p[Endoplasmic Reticulum] + 5 ADP[Endoplasmic Reticulum] + 5 Kar2p[Endoplasmic Reticulum] protein folding	protein folding	Lhs1p;Sil1p
S000005911-F-G5[Endoplasmic Reticulum] + Sar1-GTP[Endoplasmic Reticulum] + Sec23-Sec24C[Cytoplasm] + Bet1p[Endoplasmic Reticulum] + Bos1p[Endoplasmic Reticulum] => S000005911-F-G5-COPII-pbud-cplx[Endoplasmic Reticulum]	COPII (for transmembrane cargo)	Sar1p;Sec23p;Sec24p;Bet1p;Bos1p
S000005911-F-G7orG5-COPII-pbud-cplx[Endoplasmic Reticulum] + Sec13-Sec31C[Cytoplasm] + Sec16p[Endoplasmic Reticulum] + Sed4p[Endoplasmic Reticulum] + Sec17p[Endoplasmic Reticulum] => S000005911-F-G5orG7-COPII[COPII]	COPII(common	Sec13p;Sec31p;Sec16p;Sed4p;Sec17p;Sec22p
S000005911-F-G5-COPII[COPII] + TRAPPIC[COPII] + Ypt1p[COPII] + GTP[COPII] => S000005911-F-G5[Golgi] + sar1-GDP[Cytoplasm] + pi[Cytoplasm] + Sec13-Sec31C[Cytoplasm] + Sec16p[Cytoplasm] + Sec12-Sed24C[Cytoplasm] + Bet3p[Cytoplasm] + Bet5p[Cytoplasm] + Trs20p[Cytoplasm] + Trs23p[Cytoplasm] + Trs31p[Cytoplasm] + Trs33p[Cytoplasm] + Bet1p[Endoplasmic Reticulum] + Bos1p[Endoplasmic Reticulum]	COPII (for transmembrane cargo)	Ypt1p;Uso1p;bug1p;Bet3p;Bet5p;Trs20p;Trs23p;Trs31p;Trs33p
S000005911-misf-G8-cplx[Endoplasmic Reticulum] + 0.1 Hrd1p[Endoplasmic Reticulum] => S000005911-misf-G8-HRDcplx[Endoplasmic Reticulum]	ERADM	Hrd1p
S000005911-misf-G8-HRDcplx[Endoplasmic Reticulum] + 0.1 Ubc7p[Cytoplasm] + 0.1 Cue1p[Cytoplasm] + 0.1 AAAC[Cytoplasm] => S000005911-misf-G8-UBcplx[Endoplasmic Reticulum] + 0.1 Hrd1p[Endoplasmic Reticulum] + 0.1 Usa1p[Endoplasmic Reticulum] + 0.1 Der1p[Endoplasmic Reticulum]	ERADM	Ubc7p; Cue1p;Usa1p; Der1p
S000005911-misf-G8-UBcplx[Endoplasmic Reticulum] + 5 ATP[Cytoplasm] + 5 Ubiquitin[Cytoplasm] => S000005911-misf-G8-Ubiquitin[Cytoplasm] + Ubc7p[Cytoplasm] + 0.1 Cue1p[Cytoplasm] + 0.1 Ubx2p[Endoplasmic Reticulum] + 0.1 Cdc48p[Cytoplasm] + 0.1 Ufd1p[Cytoplasm] + 0.1 Npl4p[Cytoplasm] + 0.1 Usa1p[Endoplasmic Reticulum] + 0.1 Der1p[Endoplasmic Reticulum] + 5 AMP[Cytoplasm] + 5 ppi[Cytoplasm]	ERADM	Ubx2p; Cdc48p; Ufd1p;Npl4p;Ubiquitin
S000005911-misf-G8-Ubiquitin[Cytoplasm] + 0.1 Dsk2p[Cytoplasm] + 0.1 Rad23p[Cytoplasm] + 0.1 Png1p[Cytoplasm] + 5 ATP[Cytoplasm] + 0.1 26sproteosome[Cytoplasm] + 5 H2O[Cytoplasm] => G8[Cytoplasm] + 5 Ubiquitin[Cytoplasm] + 5 ADP[Cytoplasm] + 5 pi[Cytoplasm] + S000005911aa[Cytoplasm]	ERADM	Png1p;26sproteosome
S000005911-G5orG7[Golgi] + GDP-man[Golgi] => S000005911-G9[Golgi] + GDP[Golgi]	Golgi processing	Och1p
S000005911-G9[Golgi] + 5 GDP-man[Golgi] => S000005911-G10[Golgi] + 5 GDP[Golgi]	Golgi processing	Mnn9p;Van1p
S000005911-G10[Golgi] + 40 GDP-man[Golgi] => S000005911-G11[Golgi] + 40 GDP[Golgi]	Golgi processing	Anp1p;Mnn9p;Mnn10p;Mnn11p;Hoc1p
S000005911-G15[Golgi] => S000005911-G16[Golgi] + aminoacid[Golgi]	Golgi processing	Kex1p;Kex2p;Ste13p
S000005911-M1[Golgi] + GTP[Cytoplasm] + clathrinC[Cytoplasm] + Arf1p[Cytoplasm] + EXOC[Cytoplasm] => S000005911-M1[cell membrane] + GDP[Golgi] + 2 Chc1p[Cytoplasm] + Clc1p[Cytoplasm] + Arf1p[Cytoplasm] + Sec3p[Cytoplasm] + Sec5p[Cytoplasm] + Sec6p[Cytoplasm] + Sec8p[Cytoplasm] + Sec10p[Cytoplasm] + Sec15p[Cytoplasm] + Exo70p[Cytoplasm] + Exo84p[Cytoplasm] + Sec4p[Cytoplasm]	LDSV(low density Secretory vesicle)	Arf1p;Sec3p;Sec5p;Sec6p;Sec8p;Sec10p;Sec15p;Exo70p;Exo84p;Sec4p;Chc1p;Clc1p
S000004405[Cytoplasm] + SRPC[Cytoplasm] => S000004405-SRPC[Cytoplasm]	translocation from cytosol to ER (SRP-dependent)	Srp14p;Srp21p;Srp54p;Sec65p;Srp68p;Srp72p
S000004405-SRPC[Cytoplasm] + SRC[Endoplasmic Reticulum] => S000004405-SRPC-SRC[Cytoplasm]	translocation from cytosol to ER (SRP-dependent)	Srp101p;Srp102p
S000004405-SRPC-SRC[Cytoplasm] + 2 GTP[Cytoplasm] + SEC61C[Endoplasmic Reticulum] => S000004405-SRPC-SRC-SEC61C[Cytoplasm]	translocation from cytosol to ER (SRP-dependent)	Sec61p;Sbh1p;Sss1p;Ssh1p
S000004405-SRPC-SRC-SEC61C[Cytoplasm] => S000004405-SEC61C[Cytoplasm] + Srp14p[Cytoplasm] + Srp21p[Cytoplasm] + Srp68p[Cytoplasm] + Sec65p[Cytoplasm] + Srp72p[Cytoplasm] + scR1[Cytoplasm] + Srp54p[Cytoplasm] + Srp51p[Cytoplasm] + Srp52p[Cytoplasm] + 2 GDP[Cytoplasm] + 2 pi[Cytoplasm]	translocation from cytosol to ER (SRP-dependent)
S000004405-SEC61C[Cytoplasm] + SPC[Endoplasmic Reticulum] => S000004405[Endoplasmic Reticulum] + Sec61p[Endoplasmic Reticulum] + Sbh1p[Endoplasmic Reticulum] + Sss1p[Endoplasmic Reticulum] + Sec11p[Endoplasmic Reticulum] + Spc1p[Endoplasmic Reticulum] + Spc2p[Endoplasmic Reticulum] + Spc3p[Endoplasmic Reticulum] + sp[Cytoplasm]	translocation from cytosol to ER (SRP-dependent)	Sec11p;Spc1p;Spc2p;Spc3p
S000004405-SEC61C[Endoplasmic Reticulum] + 18 Dol-pp-GlcNAc(2)man(9)-Glc(3)[Endoplasmic Reticulum] + OSTC[Endoplasmic Reticulum] => S000004405-G1-SEC61C[Endoplasmic Reticulum] + 18 Dol-ppEndoplasmic Reticulum] + Ost1p[Endoplasmic Reticulum] + Ost2p[Endoplasmic Reticulum] + St3p[Endoplasmic Reticulum] + Ost4p[Endoplasmic Reticulum] + Ost5p[Endoplasmic Reticulum] + Ost6p[Endoplasmic Reticulum] + St…	ER N-glycosylation	Stt3p;Ost1p;Wbp1p;OSt3p;Ost6p;Swp1p;Ost2p;Ost5p;Ost4p
S000004405-G1-SEC61C[Endoplasmic Reticulum] => S000004405-G1[Endoplasmic Reticulum] + SEC61C[Endoplasmic Reticulum]	protein folding
S000004405-G1[Endoplasmic Reticulum] => S000004405-G2[Endoplasmic Reticulum] + Glc[Endoplasmic Reticulum]	protein folding	Cwh41p
S000004405-G2[Endoplasmic Reticulum] => S000004405-G3[Endoplasmic Reticulum] + Glc[Endoplasmic Reticulum]	protein folding	Rot2p
S000004405-G3[Endoplasmic Reticulum] => S000004405-G4[Endoplasmic Reticulum] + Glc[Endoplasmic Reticulum]	protein folding	Rot2p
S000004405-G4[Endoplasmic Reticulum] => S000004405-G5[Endoplasmic Reticulum] + man[Endoplasmic Reticulum]	protein folding	Mns1p
S000004405-G5[Endoplasmic Reticulum] + 5 Kar2p[Endoplasmic Reticulum] + 5 ATP[Endoplasmic Reticulum] + 5 Scj1p[Endoplasmic Reticulum] + 5 Jem1p[Endoplasmic Reticulum] + 5 Sec63p[Endoplasmic Reticulum] => S000004405-G5-Kar2ATPcplx[Endoplasmic Reticulum]	protein folding	Kar2p;Scj1p;Jem1p;Sec63p
S000004405-G5-Kar2ATPcplx-[Endoplasmic Reticulum] => S000004405-F-G5-Kar2ADPcplx[Endoplasmic Reticulum] + 5 Scj1p[Endoplasmic Reticulum] + 5 Jem1p[Endoplasmic Reticulum] + 5 pi[Endoplasmic Reticulum] + Sec63p[Endoplasmic Reticulum]	protein folding
S000004405-F-G5-Kar2ADPcplx[Endoplasmic Reticulum] + 5 Sil1p[Endoplasmic Reticulum] + 5 Lhs1p[Endoplasmic Reticulum] + 5 ATP[Endoplasmic Reticulum] => S000004405-F-G5[Endoplasmic Reticulum] + 5 Sil1p[Endoplasmic Reticulum] + 5 Lhs1p[Endoplasmic Reticulum] + 5 ADP[Endoplasmic Reticulum] + 5 Kar2p[Endoplasmic Reticulum] protein folding	protein folding	Lhs1p;Sil1p
S000004405-F-G5[Endoplasmic Reticulum] + Sar1-GTP[Endoplasmic Reticulum] + Sec23-Sec24C[Cytoplasm] + Bet1p[Endoplasmic Reticulum] + Bos1p[Endoplasmic Reticulum] => S000004405-F-G5-COPII-pbud-cplx[Endoplasmic Reticulum]	COPII (for transmembrane cargo)	Sar1p;Sec23p;Sec24p;Bet1p;Bos1p
S000004405-F-G7orG5-COPII-pbud-cplx[Endoplasmic Reticulum] + Sec13-Sec31C[Cytoplasm] + Sec16p[Endoplasmic Reticulum] + Sed4p[Endoplasmic Reticulum] + Sec17p[Endoplasmic Reticulum] => S000004405-F-G5orG7-COPII[COPII]	COPII(common	Sec13p;Sec31p;Sec16p;Sed4p;Sec17p;Sec22p
S000004405-F-G5-COPII[COPII] + TRAPPIC[COPII] + Ypt1p[COPII] + GTP[COPII] => S000004405-F-G5[Golgi] + sar1-GDP[Cytoplasm] + pi[Cytoplasm] + Sec13-Sec31C[Cytoplasm] + Sec16p[Cytoplasm] + Sec12-Sed24C[Cytoplasm] + Bet3p[Cytoplasm] + Bet5p[Cytoplasm] + Trs20p[Cytoplasm] + Trs23p[Cytoplasm] + Trs31p[Cytoplasm] + Trs33p[Cytoplasm] + Bet1p[Endoplasmic Reticulum] + Bos1p[Endoplasmic Reticulum]	COPII (for transmembrane cargo)	Ypt1p;Uso1p;bug1p;Bet3p;Bet5p;Trs20p;Trs23p;Trs31p;Trs33p
S000004405-misf-G8-cplx[Endoplasmic Reticulum] + 0.1 Hrd1p[Endoplasmic Reticulum] => S000004405-misf-G8-HRDcplx[Endoplasmic Reticulum]	ERADM	Hrd1p
S000004405-misf-G8-HRDcplx[Endoplasmic Reticulum] + 0.1 Ubc7p[Cytoplasm] + 0.1 Cue1p[Cytoplasm] + 0.1 AAAC[Cytoplasm] => S000004405-misf-G8-UBcplx[Endoplasmic Reticulum] + 0.1 Hrd1p[Endoplasmic Reticulum] + 0.1 Usa1p[Endoplasmic Reticulum] + 0.1 Der1p[Endoplasmic Reticulum]	ERADM	Ubc7p; Cue1p;Usa1p; Der1p
S000004405-misf-G8-UBcplx[Endoplasmic Reticulum] + 5 ATP[Cytoplasm] + 5 Ubiquitin[Cytoplasm] => S000004405-misf-G8-Ubiquitin[Cytoplasm] + Ubc7p[Cytoplasm] + 0.1 Cue1p[Cytoplasm] + 0.1 Ubx2p[Endoplasmic Reticulum] + 0.1 Cdc48p[Cytoplasm] + 0.1 Ufd1p[Cytoplasm] + 0.1 Npl4p[Cytoplasm] + 0.1 Usa1p[Endoplasmic Reticulum] + 0.1 Der1p[Endoplasmic Reticulum] + 5 AMP[Cytoplasm] + 5 ppi[Cytoplasm]	ERADM	Ubx2p; Cdc48p; Ufd1p;Npl4p;Ubiquitin
S000004405-misf-G8-Ubiquitin[Cytoplasm] + 0.1 Dsk2p[Cytoplasm] + 0.1 Rad23p[Cytoplasm] + 0.1 Png1p[Cytoplasm] + 5 ATP[Cytoplasm] + 0.1 26sproteosome[Cytoplasm] + 5 H2O[Cytoplasm] => G8[Cytoplasm] + 5 Ubiquitin[Cytoplasm] + 5 ADP[Cytoplasm] + 5 pi[Cytoplasm] + S000004405aa[Cytoplasm]	ERADM	Png1p;26sproteosome
S000004405-G5orG7[Golgi] + GDP-man[Golgi] => S000004405-G9[Golgi] + GDP[Golgi]	Golgi processing	Och1p
S000004405-G9[Golgi] + 5 GDP-man[Golgi] => S000004405-G10[Golgi] + 5 GDP[Golgi]	Golgi processing	Mnn9p;Van1p
S000004405-G10[Golgi] + 40 GDP-man[Golgi] => S000004405-G11[Golgi] + 40 GDP[Golgi]	Golgi processing	Anp1p;Mnn9p;Mnn10p;Mnn11p;Hoc1p
S000004405-G15[Golgi] => S000004405-G16[Golgi] + aminoacid[Golgi]	Golgi processing	Kex1p;Kex2p;Ste13p
S000004405-M1[Golgi] + GTP[Cytoplasm] + clathrinC[Cytoplasm] + Arf1p[Cytoplasm] + EXOC[Cytoplasm] => S000004405-M1[cell membrane] + GDP[Golgi] + 2 Chc1p[Cytoplasm] + Clc1p[Cytoplasm] + Arf1p[Cytoplasm] + Sec3p[Cytoplasm] + Sec5p[Cytoplasm] + Sec6p[Cytoplasm] + Sec8p[Cytoplasm] + Sec10p[Cytoplasm] + Sec15p[Cytoplasm] + Exo70p[Cytoplasm] + Exo84p[Cytoplasm] + Sec4p[Cytoplasm]	LDSV(low density Secretory vesicle)	Arf1p;Sec3p;Sec5p;Sec6p;Sec8p;Sec10p;Sec15p;Exo70p;Exo84p;Sec4p;Chc1p;Clc1p
S000003363[Cytoplasm] + SRPC[Cytoplasm] => S000003363-SRPC[Cytoplasm]	translocation from cytosol to ER (SRP-dependent)	Srp14p;Srp21p;Srp54p;Sec65p;Srp68p;Srp72p
S000003363-SRPC[Cytoplasm] + SRC[Endoplasmic Reticulum] => S000003363-SRPC-SRC[Cytoplasm]	translocation from cytosol to ER (SRP-dependent)	Srp101p;Srp102p
S000003363-SRPC-SRC[Cytoplasm] + 2 GTP[Cytoplasm] + SEC61C[Endoplasmic Reticulum] => S000003363-SRPC-SRC-SEC61C[Cytoplasm]	translocation from cytosol to ER (SRP-dependent)	Sec61p;Sbh1p;Sss1p;Ssh1p
S000003363-SRPC-SRC-SEC61C[Cytoplasm] => S000003363-SEC61C[Cytoplasm] + Srp14p[Cytoplasm] + Srp21p[Cytoplasm] + Srp68p[Cytoplasm] + Sec65p[Cytoplasm] + Srp72p[Cytoplasm] + scR1[Cytoplasm] + Srp54p[Cytoplasm] + Srp51p[Cytoplasm] + Srp52p[Cytoplasm] + 2 GDP[Cytoplasm] + 2 pi[Cytoplasm]	translocation from cytosol to ER (SRP-dependent)
S000003363-SEC61C[Cytoplasm] + SPC[Endoplasmic Reticulum] => S000003363[Endoplasmic Reticulum] + Sec61p[Endoplasmic Reticulum] + Sbh1p[Endoplasmic Reticulum] + Sss1p[Endoplasmic Reticulum] + Sec11p[Endoplasmic Reticulum] + Spc1p[Endoplasmic Reticulum] + Spc2p[Endoplasmic Reticulum] + Spc3p[Endoplasmic Reticulum] + sp[Cytoplasm]	translocation from cytosol to ER (SRP-dependent)	Sec11p;Spc1p;Spc2p;Spc3p
S000003363-G1-SEC61C[Endoplasmic Reticulum] => S000003363-G1[Endoplasmic Reticulum] + SEC61C[Endoplasmic Reticulum]	protein folding
S000003363-G5[Endoplasmic Reticulum] + 5 Kar2p[Endoplasmic Reticulum] + 5 ATP[Endoplasmic Reticulum] + 5 Scj1p[Endoplasmic Reticulum] + 5 Jem1p[Endoplasmic Reticulum] + 5 Sec63p[Endoplasmic Reticulum] => S000003363-G5-Kar2ATPcplx[Endoplasmic Reticulum]	protein folding	Kar2p;Scj1p;Jem1p;Sec63p
S000003363-G5-Kar2ATPcplx-[Endoplasmic Reticulum] => S000003363-F-G5-Kar2ADPcplx[Endoplasmic Reticulum] + 5 Scj1p[Endoplasmic Reticulum] + 5 Jem1p[Endoplasmic Reticulum] + 5 pi[Endoplasmic Reticulum] + Sec63p[Endoplasmic Reticulum]	protein folding
S000003363-F-G5-Kar2ADPcplx[Endoplasmic Reticulum] + 5 Sil1p[Endoplasmic Reticulum] + 5 Lhs1p[Endoplasmic Reticulum] + 5 ATP[Endoplasmic Reticulum] => S000003363-F-G5[Endoplasmic Reticulum] + 5 Sil1p[Endoplasmic Reticulum] + 5 Lhs1p[Endoplasmic Reticulum] + 5 ADP[Endoplasmic Reticulum] + 5 Kar2p[Endoplasmic Reticulum] protein folding	protein folding	Lhs1p;Sil1p
S000003363-F-G5[Endoplasmic Reticulum] + Sar1-GTP[Endoplasmic Reticulum] + Sec23-Sec24C[Cytoplasm] + Bet1p[Endoplasmic Reticulum] + Bos1p[Endoplasmic Reticulum] => S000003363-F-G5-COPII-pbud-cplx[Endoplasmic Reticulum]	COPII (for transmembrane cargo)	Sar1p;Sec23p;Sec24p;Bet1p;Bos1p
S000003363-F-G7orG5-COPII-pbud-cplx[Endoplasmic Reticulum] + Sec13-Sec31C[Cytoplasm] + Sec16p[Endoplasmic Reticulum] + Sed4p[Endoplasmic Reticulum] + Sec17p[Endoplasmic Reticulum] => S000003363-F-G5orG7-COPII[COPII]	COPII(common	Sec13p;Sec31p;Sec16p;Sed4p;Sec17p;Sec22p
S000003363-F-G5-COPII[COPII] + TRAPPIC[COPII] + Ypt1p[COPII] + GTP[COPII] => S000003363-F-G5[Golgi] + sar1-GDP[Cytoplasm] + pi[Cytoplasm] + Sec13-Sec31C[Cytoplasm] + Sec16p[Cytoplasm] + Sec12-Sed24C[Cytoplasm] + Bet3p[Cytoplasm] + Bet5p[Cytoplasm] + Trs20p[Cytoplasm] + Trs23p[Cytoplasm] + Trs31p[Cytoplasm] + Trs33p[Cytoplasm] + Bet1p[Endoplasmic Reticulum] + Bos1p[Endoplasmic Reticulum]	COPII (for transmembrane cargo)	Ypt1p;Uso1p;bug1p;Bet3p;Bet5p;Trs20p;Trs23p;Trs31p;Trs33p
S000003363-misf-G8-cplx[Endoplasmic Reticulum] + 0.1 Hrd1p[Endoplasmic Reticulum] => S000003363-misf-G8-HRDcplx[Endoplasmic Reticulum]	ERADM	Hrd1p
S000003363-misf-G8-HRDcplx[Endoplasmic Reticulum] + 0.1 Ubc7p[Cytoplasm] + 0.1 Cue1p[Cytoplasm] + 0.1 AAAC[Cytoplasm] => S000003363-misf-G8-UBcplx[Endoplasmic Reticulum] + 0.1 Hrd1p[Endoplasmic Reticulum] + 0.1 Usa1p[Endoplasmic Reticulum] + 0.1 Der1p[Endoplasmic Reticulum]	ERADM	Ubc7p; Cue1p;Usa1p; Der1p
S000003363-misf-G8-UBcplx[Endoplasmic Reticulum] + 5 ATP[Cytoplasm] + 5 Ubiquitin[Cytoplasm] => S000003363-misf-G8-Ubiquitin[Cytoplasm] + Ubc7p[Cytoplasm] + 0.1 Cue1p[Cytoplasm] + 0.1 Ubx2p[Endoplasmic Reticulum] + 0.1 Cdc48p[Cytoplasm] + 0.1 Ufd1p[Cytoplasm] + 0.1 Npl4p[Cytoplasm] + 0.1 Usa1p[Endoplasmic Reticulum] + 0.1 Der1p[Endoplasmic Reticulum] + 5 AMP[Cytoplasm] + 5 ppi[Cytoplasm]	ERADM	Ubx2p; Cdc48p; Ufd1p;Npl4p;Ubiquitin
S000003363-misf-G8-Ubiquitin[Cytoplasm] + 0.1 Dsk2p[Cytoplasm] + 0.1 Rad23p[Cytoplasm] + 0.1 Png1p[Cytoplasm] + 5 ATP[Cytoplasm] + 0.1 26sproteosome[Cytoplasm] + 5 H2O[Cytoplasm] => G8[Cytoplasm] + 5 Ubiquitin[Cytoplasm] + 5 ADP[Cytoplasm] + 5 pi[Cytoplasm] + S000003363aa[Cytoplasm]	ERADM	Png1p;26sproteosome
S000003363-G15[Golgi] => S000003363-G16[Golgi] + aminoacid[Golgi]	Golgi processing	Kex1p;Kex2p;Ste13p
S000003363-M1[Golgi] + GTP[Cytoplasm] + clathrinC[Cytoplasm] + Arf1p[Cytoplasm] + EXOC[Cytoplasm] => S000003363-M1[cell membrane] + GDP[Golgi] + 2 Chc1p[Cytoplasm] + Clc1p[Cytoplasm] + Arf1p[Cytoplasm] + Sec3p[Cytoplasm] + Sec5p[Cytoplasm] + Sec6p[Cytoplasm] + Sec8p[Cytoplasm] + Sec10p[Cytoplasm] + Sec15p[Cytoplasm] + Exo70p[Cytoplasm] + Exo84p[Cytoplasm] + Sec4p[Cytoplasm]	LDSV(low density Secretory vesicle)	Arf1p;Sec3p;Sec5p;Sec6p;Sec8p;Sec10p;Sec15p;Exo70p;Exo84p;Sec4p;Chc1p;Clc1p
S000004667[Cytoplasm] + SRPC[Cytoplasm] => S000004667-SRPC[Cytoplasm]	translocation from cytosol to ER (SRP-dependent)	Srp14p;Srp21p;Srp54p;Sec65p;Srp68p;Srp72p
S000004667-SRPC[Cytoplasm] + SRC[Endoplasmic Reticulum] => S000004667-SRPC-SRC[Cytoplasm]	translocation from cytosol to ER (SRP-dependent)	Srp101p;Srp102p
S000004667-SRPC-SRC[Cytoplasm] + 2 GTP[Cytoplasm] + SEC61C[Endoplasmic Reticulum] => S000004667-SRPC-SRC-SEC61C[Cytoplasm]	translocation from cytosol to ER (SRP-dependent)	Sec61p;Sbh1p;Sss1p;Ssh1p
S000004667-SRPC-SRC-SEC61C[Cytoplasm] => S000004667-SEC61C[Cytoplasm] + Srp14p[Cytoplasm] + Srp21p[Cytoplasm] + Srp68p[Cytoplasm] + Sec65p[Cytoplasm] + Srp72p[Cytoplasm] + scR1[Cytoplasm] + Srp54p[Cytoplasm] + Srp51p[Cytoplasm] + Srp52p[Cytoplasm] + 2 GDP[Cytoplasm] + 2 pi[Cytoplasm]	translocation from cytosol to ER (SRP-dependent)
S000004667-SEC61C[Cytoplasm] + SPC[Endoplasmic Reticulum] => S000004667[Endoplasmic Reticulum] + Sec61p[Endoplasmic Reticulum] + Sbh1p[Endoplasmic Reticulum] + Sss1p[Endoplasmic Reticulum] + Sec11p[Endoplasmic Reticulum] + Spc1p[Endoplasmic Reticulum] + Spc2p[Endoplasmic Reticulum] + Spc3p[Endoplasmic Reticulum] + sp[Cytoplasm]	translocation from cytosol to ER (SRP-dependent)	Sec11p;Spc1p;Spc2p;Spc3p
S000004667-G1-SEC61C[Endoplasmic Reticulum] => S000004667-G1[Endoplasmic Reticulum] + SEC61C[Endoplasmic Reticulum]	protein folding
S000004667-G5[Endoplasmic Reticulum] + 5 Kar2p[Endoplasmic Reticulum] + 5 ATP[Endoplasmic Reticulum] + 5 Scj1p[Endoplasmic Reticulum] + 5 Jem1p[Endoplasmic Reticulum] + 5 Sec63p[Endoplasmic Reticulum] => S000004667-G5-Kar2ATPcplx[Endoplasmic Reticulum]	protein folding	Kar2p;Scj1p;Jem1p;Sec63p
S000004667-G5-Kar2ATPcplx-[Endoplasmic Reticulum] => S000004667-F-G5-Kar2ADPcplx[Endoplasmic Reticulum] + 5 Scj1p[Endoplasmic Reticulum] + 5 Jem1p[Endoplasmic Reticulum] + 5 pi[Endoplasmic Reticulum] + Sec63p[Endoplasmic Reticulum]	protein folding
S000004667-F-G5-Kar2ADPcplx[Endoplasmic Reticulum] + 5 Sil1p[Endoplasmic Reticulum] + 5 Lhs1p[Endoplasmic Reticulum] + 5 ATP[Endoplasmic Reticulum] => S000004667-F-G5[Endoplasmic Reticulum] + 5 Sil1p[Endoplasmic Reticulum] + 5 Lhs1p[Endoplasmic Reticulum] + 5 ADP[Endoplasmic Reticulum] + 5 Kar2p[Endoplasmic Reticulum] protein folding	protein folding	Lhs1p;Sil1p
S000004667-F-G5[Endoplasmic Reticulum] + Sar1-GTP[Endoplasmic Reticulum] + Sec23-Sec24C[Cytoplasm] + Bet1p[Endoplasmic Reticulum] + Bos1p[Endoplasmic Reticulum] => S000004667-F-G5-COPII-pbud-cplx[Endoplasmic Reticulum]	COPII (for transmembrane cargo)	Sar1p;Sec23p;Sec24p;Bet1p;Bos1p
S000004667-F-G7orG5-COPII-pbud-cplx[Endoplasmic Reticulum] + Sec13-Sec31C[Cytoplasm] + Sec16p[Endoplasmic Reticulum] + Sed4p[Endoplasmic Reticulum] + Sec17p[Endoplasmic Reticulum] => S000004667-F-G5orG7-COPII[COPII]	COPII(common	Sec13p;Sec31p;Sec16p;Sed4p;Sec17p;Sec22p
S000004667-F-G5-COPII[COPII] + TRAPPIC[COPII] + Ypt1p[COPII] + GTP[COPII] => S000004667-F-G5[Golgi] + sar1-GDP[Cytoplasm] + pi[Cytoplasm] + Sec13-Sec31C[Cytoplasm] + Sec16p[Cytoplasm] + Sec12-Sed24C[Cytoplasm] + Bet3p[Cytoplasm] + Bet5p[Cytoplasm] + Trs20p[Cytoplasm] + Trs23p[Cytoplasm] + Trs31p[Cytoplasm] + Trs33p[Cytoplasm] + Bet1p[Endoplasmic Reticulum] + Bos1p[Endoplasmic Reticulum]	COPII (for transmembrane cargo)	Ypt1p;Uso1p;bug1p;Bet3p;Bet5p;Trs20p;Trs23p;Trs31p;Trs33p
S000004667-misf-G8-cplx[Endoplasmic Reticulum] + 0.1 Hrd1p[Endoplasmic Reticulum] => S000004667-misf-G8-HRDcplx[Endoplasmic Reticulum]	ERADM	Hrd1p
S000004667-misf-G8-HRDcplx[Endoplasmic Reticulum] + 0.1 Ubc7p[Cytoplasm] + 0.1 Cue1p[Cytoplasm] + 0.1 AAAC[Cytoplasm] => S000004667-misf-G8-UBcplx[Endoplasmic Reticulum] + 0.1 Hrd1p[Endoplasmic Reticulum] + 0.1 Usa1p[Endoplasmic Reticulum] + 0.1 Der1p[Endoplasmic Reticulum]	ERADM	Ubc7p; Cue1p;Usa1p; Der1p
S000004667-misf-G8-UBcplx[Endoplasmic Reticulum] + 5 ATP[Cytoplasm] + 5 Ubiquitin[Cytoplasm] => S000004667-misf-G8-Ubiquitin[Cytoplasm] + Ubc7p[Cytoplasm] + 0.1 Cue1p[Cytoplasm] + 0.1 Ubx2p[Endoplasmic Reticulum] + 0.1 Cdc48p[Cytoplasm] + 0.1 Ufd1p[Cytoplasm] + 0.1 Npl4p[Cytoplasm] + 0.1 Usa1p[Endoplasmic Reticulum] + 0.1 Der1p[Endoplasmic Reticulum] + 5 AMP[Cytoplasm] + 5 ppi[Cytoplasm]	ERADM	Ubx2p; Cdc48p; Ufd1p;Npl4p;Ubiquitin
S000004667-misf-G8-Ubiquitin[Cytoplasm] + 0.1 Dsk2p[Cytoplasm] + 0.1 Rad23p[Cytoplasm] + 0.1 Png1p[Cytoplasm] + 5 ATP[Cytoplasm] + 0.1 26sproteosome[Cytoplasm] + 5 H2O[Cytoplasm] => G8[Cytoplasm] + 5 Ubiquitin[Cytoplasm] + 5 ADP[Cytoplasm] + 5 pi[Cytoplasm] + S000004667aa[Cytoplasm]	ERADM	Png1p;26sproteosome
S000004667-G15[Golgi] => S000004667-G16[Golgi] + aminoacid[Golgi]	Golgi processing	Kex1p;Kex2p;Ste13p
S000004667-M1[Golgi] + GTP[Cytoplasm] + clathrinC[Cytoplasm] + Arf1p[Cytoplasm] + EXOC[Cytoplasm] => S000004667-M1[cell membrane] + GDP[Golgi] + 2 Chc1p[Cytoplasm] + Clc1p[Cytoplasm] + Arf1p[Cytoplasm] + Sec3p[Cytoplasm] + Sec5p[Cytoplasm] + Sec6p[Cytoplasm] + Sec8p[Cytoplasm] + Sec10p[Cytoplasm] + Sec15p[Cytoplasm] + Exo70p[Cytoplasm] + Exo84p[Cytoplasm] + Sec4p[Cytoplasm]	LDSV(low density Secretory vesicle)	Arf1p;Sec3p;Sec5p;Sec6p;Sec8p;Sec10p;Sec15p;Exo70p;Exo84p;Sec4p;Chc1p;Clc1p
S000002684[Cytoplasm] + SRPC[Cytoplasm] => S000002684-SRPC[Cytoplasm]	translocation from cytosol to ER (SRP-dependent)	Srp14p;Srp21p;Srp54p;Sec65p;Srp68p;Srp72p
S000002684-SRPC[Cytoplasm] + SRC[Endoplasmic Reticulum] => S000002684-SRPC-SRC[Cytoplasm]	translocation from cytosol to ER (SRP-dependent)	Srp101p;Srp102p
S000002684-SRPC-SRC[Cytoplasm] + 2 GTP[Cytoplasm] + SEC61C[Endoplasmic Reticulum] => S000002684-SRPC-SRC-SEC61C[Cytoplasm]	translocation from cytosol to ER (SRP-dependent)	Sec61p;Sbh1p;Sss1p;Ssh1p
S000002684-SRPC-SRC-SEC61C[Cytoplasm] => S000002684-SEC61C[Cytoplasm] + Srp14p[Cytoplasm] + Srp21p[Cytoplasm] + Srp68p[Cytoplasm] + Sec65p[Cytoplasm] + Srp72p[Cytoplasm] + scR1[Cytoplasm] + Srp54p[Cytoplasm] + Srp51p[Cytoplasm] + Srp52p[Cytoplasm] + 2 GDP[Cytoplasm] + 2 pi[Cytoplasm]	translocation from cytosol to ER (SRP-dependent)
S000002684-SEC61C[Cytoplasm] + SPC[Endoplasmic Reticulum] => S000002684[Endoplasmic Reticulum] + Sec61p[Endoplasmic Reticulum] + Sbh1p[Endoplasmic Reticulum] + Sss1p[Endoplasmic Reticulum] + Sec11p[Endoplasmic Reticulum] + Spc1p[Endoplasmic Reticulum] + Spc2p[Endoplasmic Reticulum] + Spc3p[Endoplasmic Reticulum] + sp[Cytoplasm]	translocation from cytosol to ER (SRP-dependent)	Sec11p;Spc1p;Spc2p;Spc3p
S000002684-G1-SEC61C[Endoplasmic Reticulum] => S000002684-G1[Endoplasmic Reticulum] + SEC61C[Endoplasmic Reticulum]	protein folding
S000002684-G5[Endoplasmic Reticulum] + 5 Kar2p[Endoplasmic Reticulum] + 5 ATP[Endoplasmic Reticulum] + 5 Scj1p[Endoplasmic Reticulum] + 5 Jem1p[Endoplasmic Reticulum] + 5 Sec63p[Endoplasmic Reticulum] => S000002684-G5-Kar2ATPcplx[Endoplasmic Reticulum]	protein folding	Kar2p;Scj1p;Jem1p;Sec63p
S000002684-G5-Kar2ATPcplx-[Endoplasmic Reticulum] => S000002684-F-G5-Kar2ADPcplx[Endoplasmic Reticulum] + 5 Scj1p[Endoplasmic Reticulum] + 5 Jem1p[Endoplasmic Reticulum] + 5 pi[Endoplasmic Reticulum] + Sec63p[Endoplasmic Reticulum]	protein folding
S000002684-F-G5-Kar2ADPcplx[Endoplasmic Reticulum] + 5 Sil1p[Endoplasmic Reticulum] + 5 Lhs1p[Endoplasmic Reticulum] + 5 ATP[Endoplasmic Reticulum] => S000002684-F-G5[Endoplasmic Reticulum] + 5 Sil1p[Endoplasmic Reticulum] + 5 Lhs1p[Endoplasmic Reticulum] + 5 ADP[Endoplasmic Reticulum] + 5 Kar2p[Endoplasmic Reticulum] protein folding	protein folding	Lhs1p;Sil1p
S000002684-F-G5[Endoplasmic Reticulum] + Sar1-GTP[Endoplasmic Reticulum] + Sec23-Sec24C[Cytoplasm] + Bet1p[Endoplasmic Reticulum] + Bos1p[Endoplasmic Reticulum] => S000002684-F-G5-COPII-pbud-cplx[Endoplasmic Reticulum]	COPII (for transmembrane cargo)	Sar1p;Sec23p;Sec24p;Bet1p;Bos1p
S000002684-F-G7orG5-COPII-pbud-cplx[Endoplasmic Reticulum] + Sec13-Sec31C[Cytoplasm] + Sec16p[Endoplasmic Reticulum] + Sed4p[Endoplasmic Reticulum] + Sec17p[Endoplasmic Reticulum] => S000002684-F-G5orG7-COPII[COPII]	COPII(common	Sec13p;Sec31p;Sec16p;Sed4p;Sec17p;Sec22p
S000002684-F-G5-COPII[COPII] + TRAPPIC[COPII] + Ypt1p[COPII] + GTP[COPII] => S000002684-F-G5[Golgi] + sar1-GDP[Cytoplasm] + pi[Cytoplasm] + Sec13-Sec31C[Cytoplasm] + Sec16p[Cytoplasm] + Sec12-Sed24C[Cytoplasm] + Bet3p[Cytoplasm] + Bet5p[Cytoplasm] + Trs20p[Cytoplasm] + Trs23p[Cytoplasm] + Trs31p[Cytoplasm] + Trs33p[Cytoplasm] + Bet1p[Endoplasmic Reticulum] + Bos1p[Endoplasmic Reticulum]	COPII (for transmembrane cargo)	Ypt1p;Uso1p;bug1p;Bet3p;Bet5p;Trs20p;Trs23p;Trs31p;Trs33p
S000002684-misf-G8-cplx[Endoplasmic Reticulum] + 0.1 Hrd1p[Endoplasmic Reticulum] => S000002684-misf-G8-HRDcplx[Endoplasmic Reticulum]	ERADM	Hrd1p
S000002684-misf-G8-HRDcplx[Endoplasmic Reticulum] + 0.1 Ubc7p[Cytoplasm] + 0.1 Cue1p[Cytoplasm] + 0.1 AAAC[Cytoplasm] => S000002684-misf-G8-UBcplx[Endoplasmic Reticulum] + 0.1 Hrd1p[Endoplasmic Reticulum] + 0.1 Usa1p[Endoplasmic Reticulum] + 0.1 Der1p[Endoplasmic Reticulum]	ERADM	Ubc7p; Cue1p;Usa1p; Der1p
S000002684-misf-G8-UBcplx[Endoplasmic Reticulum] + 5 ATP[Cytoplasm] + 5 Ubiquitin[Cytoplasm] => S000002684-misf-G8-Ubiquitin[Cytoplasm] + Ubc7p[Cytoplasm] + 0.1 Cue1p[Cytoplasm] + 0.1 Ubx2p[Endoplasmic Reticulum] + 0.1 Cdc48p[Cytoplasm] + 0.1 Ufd1p[Cytoplasm] + 0.1 Npl4p[Cytoplasm] + 0.1 Usa1p[Endoplasmic Reticulum] + 0.1 Der1p[Endoplasmic Reticulum] + 5 AMP[Cytoplasm] + 5 ppi[Cytoplasm]	ERADM	Ubx2p; Cdc48p; Ufd1p;Npl4p;Ubiquitin
S000002684-misf-G8-Ubiquitin[Cytoplasm] + 0.1 Dsk2p[Cytoplasm] + 0.1 Rad23p[Cytoplasm] + 0.1 Png1p[Cytoplasm] + 5 ATP[Cytoplasm] + 0.1 26sproteosome[Cytoplasm] + 5 H2O[Cytoplasm] => G8[Cytoplasm] + 5 Ubiquitin[Cytoplasm] + 5 ADP[Cytoplasm] + 5 pi[Cytoplasm] + S000002684aa[Cytoplasm]	ERADM	Png1p;26sproteosome
S000002684-G15[Golgi] => S000002684-G16[Golgi] + aminoacid[Golgi]	Golgi processing	Kex1p;Kex2p;Ste13p
S000002684-M1[Golgi] + GTP[Cytoplasm] + clathrinC[Cytoplasm] + Arf1p[Cytoplasm] + EXOC[Cytoplasm] => S000002684-M1[cell membrane] + GDP[Golgi] + 2 Chc1p[Cytoplasm] + Clc1p[Cytoplasm] + Arf1p[Cytoplasm] + Sec3p[Cytoplasm] + Sec5p[Cytoplasm] + Sec6p[Cytoplasm] + Sec8p[Cytoplasm] + Sec10p[Cytoplasm] + Sec15p[Cytoplasm] + Exo70p[Cytoplasm] + Exo84p[Cytoplasm] + Sec4p[Cytoplasm]	LDSV(low density Secretory vesicle)	Arf1p;Sec3p;Sec5p;Sec6p;Sec8p;Sec10p;Sec15p;Exo70p;Exo84p;Sec4p;Chc1p;Clc1p
S000000987[Cytoplasm] + SRPC[Cytoplasm] => S000000987-SRPC[Cytoplasm]	translocation from cytosol to ER (SRP-dependent)	Srp14p;Srp21p;Srp54p;Sec65p;Srp68p;Srp72p
S000000987-SRPC[Cytoplasm] + SRC[Endoplasmic Reticulum] => S000000987-SRPC-SRC[Cytoplasm]	translocation from cytosol to ER (SRP-dependent)	Srp101p;Srp102p
S000000987-SRPC-SRC[Cytoplasm] + 2 GTP[Cytoplasm] + SEC61C[Endoplasmic Reticulum] => S000000987-SRPC-SRC-SEC61C[Cytoplasm]	translocation from cytosol to ER (SRP-dependent)	Sec61p;Sbh1p;Sss1p;Ssh1p
S000000987-SRPC-SRC-SEC61C[Cytoplasm] => S000000987-SEC61C[Cytoplasm] + Srp14p[Cytoplasm] + Srp21p[Cytoplasm] + Srp68p[Cytoplasm] + Sec65p[Cytoplasm] + Srp72p[Cytoplasm] + scR1[Cytoplasm] + Srp54p[Cytoplasm] + Srp51p[Cytoplasm] + Srp52p[Cytoplasm] + 2 GDP[Cytoplasm] + 2 pi[Cytoplasm]	translocation from cytosol to ER (SRP-dependent)
S000000987-SEC61C[Cytoplasm] + SPC[Endoplasmic Reticulum] => S000000987[Endoplasmic Reticulum] + Sec61p[Endoplasmic Reticulum] + Sbh1p[Endoplasmic Reticulum] + Sss1p[Endoplasmic Reticulum] + Sec11p[Endoplasmic Reticulum] + Spc1p[Endoplasmic Reticulum] + Spc2p[Endoplasmic Reticulum] + Spc3p[Endoplasmic Reticulum] + sp[Cytoplasm]	translocation from cytosol to ER (SRP-dependent)	Sec11p;Spc1p;Spc2p;Spc3p
S000000987-G1-SEC61C[Endoplasmic Reticulum] => S000000987-G1[Endoplasmic Reticulum] + SEC61C[Endoplasmic Reticulum]	protein folding
S000000987-G5[Endoplasmic Reticulum] + 5 Kar2p[Endoplasmic Reticulum] + 5 ATP[Endoplasmic Reticulum] + 5 Scj1p[Endoplasmic Reticulum] + 5 Jem1p[Endoplasmic Reticulum] + 5 Sec63p[Endoplasmic Reticulum] => S000000987-G5-Kar2ATPcplx[Endoplasmic Reticulum]	protein folding	Kar2p;Scj1p;Jem1p;Sec63p
S000000987-G5-Kar2ATPcplx-[Endoplasmic Reticulum] => S000000987-F-G5-Kar2ADPcplx[Endoplasmic Reticulum] + 5 Scj1p[Endoplasmic Reticulum] + 5 Jem1p[Endoplasmic Reticulum] + 5 pi[Endoplasmic Reticulum] + Sec63p[Endoplasmic Reticulum]	protein folding
S000000987-F-G5-Kar2ADPcplx[Endoplasmic Reticulum] + 5 Sil1p[Endoplasmic Reticulum] + 5 Lhs1p[Endoplasmic Reticulum] + 5 ATP[Endoplasmic Reticulum] => S000000987-F-G5[Endoplasmic Reticulum] + 5 Sil1p[Endoplasmic Reticulum] + 5 Lhs1p[Endoplasmic Reticulum] + 5 ADP[Endoplasmic Reticulum] + 5 Kar2p[Endoplasmic Reticulum] protein folding	protein folding	Lhs1p;Sil1p
S000000987-F-G5[Endoplasmic Reticulum] + Sar1-GTP[Endoplasmic Reticulum] + Sec23-Sec24C[Cytoplasm] + Bet1p[Endoplasmic Reticulum] + Bos1p[Endoplasmic Reticulum] => S000000987-F-G5-COPII-pbud-cplx[Endoplasmic Reticulum]	COPII (for transmembrane cargo)	Sar1p;Sec23p;Sec24p;Bet1p;Bos1p
S000000987-F-G7orG5-COPII-pbud-cplx[Endoplasmic Reticulum] + Sec13-Sec31C[Cytoplasm] + Sec16p[Endoplasmic Reticulum] + Sed4p[Endoplasmic Reticulum] + Sec17p[Endoplasmic Reticulum] => S000000987-F-G5orG7-COPII[COPII]	COPII(common	Sec13p;Sec31p;Sec16p;Sed4p;Sec17p;Sec22p
S000000987-F-G5-COPII[COPII] + TRAPPIC[COPII] + Ypt1p[COPII] + GTP[COPII] => S000000987-F-G5[Golgi] + sar1-GDP[Cytoplasm] + pi[Cytoplasm] + Sec13-Sec31C[Cytoplasm] + Sec16p[Cytoplasm] + Sec12-Sed24C[Cytoplasm] + Bet3p[Cytoplasm] + Bet5p[Cytoplasm] + Trs20p[Cytoplasm] + Trs23p[Cytoplasm] + Trs31p[Cytoplasm] + Trs33p[Cytoplasm] + Bet1p[Endoplasmic Reticulum] + Bos1p[Endoplasmic Reticulum]	COPII (for transmembrane cargo)	Ypt1p;Uso1p;bug1p;Bet3p;Bet5p;Trs20p;Trs23p;Trs31p;Trs33p
S000000987-misf-G8-cplx[Endoplasmic Reticulum] + 0.1 Hrd1p[Endoplasmic Reticulum] => S000000987-misf-G8-HRDcplx[Endoplasmic Reticulum]	ERADM	Hrd1p
S000000987-misf-G8-HRDcplx[Endoplasmic Reticulum] + 0.1 Ubc7p[Cytoplasm] + 0.1 Cue1p[Cytoplasm] + 0.1 AAAC[Cytoplasm] => S000000987-misf-G8-UBcplx[Endoplasmic Reticulum] + 0.1 Hrd1p[Endoplasmic Reticulum] + 0.1 Usa1p[Endoplasmic Reticulum] + 0.1 Der1p[Endoplasmic Reticulum]	ERADM	Ubc7p; Cue1p;Usa1p; Der1p
S000000987-misf-G8-UBcplx[Endoplasmic Reticulum] + 5 ATP[Cytoplasm] + 5 Ubiquitin[Cytoplasm] => S000000987-misf-G8-Ubiquitin[Cytoplasm] + Ubc7p[Cytoplasm] + 0.1 Cue1p[Cytoplasm] + 0.1 Ubx2p[Endoplasmic Reticulum] + 0.1 Cdc48p[Cytoplasm] + 0.1 Ufd1p[Cytoplasm] + 0.1 Npl4p[Cytoplasm] + 0.1 Usa1p[Endoplasmic Reticulum] + 0.1 Der1p[Endoplasmic Reticulum] + 5 AMP[Cytoplasm] + 5 ppi[Cytoplasm]	ERADM	Ubx2p; Cdc48p; Ufd1p;Npl4p;Ubiquitin
S000000987-misf-G8-Ubiquitin[Cytoplasm] + 0.1 Dsk2p[Cytoplasm] + 0.1 Rad23p[Cytoplasm] + 0.1 Png1p[Cytoplasm] + 5 ATP[Cytoplasm] + 0.1 26sproteosome[Cytoplasm] + 5 H2O[Cytoplasm] => G8[Cytoplasm] + 5 Ubiquitin[Cytoplasm] + 5 ADP[Cytoplasm] + 5 pi[Cytoplasm] + S000000987aa[Cytoplasm]	ERADM	Png1p;26sproteosome
S000000987-G15[Golgi] => S000000987-G16[Golgi] + aminoacid[Golgi]	Golgi processing	Kex1p;Kex2p;Ste13p
S000000987-M1[Golgi] + GTP[Cytoplasm] + clathrinC[Cytoplasm] + Arf1p[Cytoplasm] + EXOC[Cytoplasm] => S000000987-M1[cell membrane] + GDP[Golgi] + 2 Chc1p[Cytoplasm] + Clc1p[Cytoplasm] + Arf1p[Cytoplasm] + Sec3p[Cytoplasm] + Sec5p[Cytoplasm] + Sec6p[Cytoplasm] + Sec8p[Cytoplasm] + Sec10p[Cytoplasm] + Sec15p[Cytoplasm] + Exo70p[Cytoplasm] + Exo84p[Cytoplasm] + Sec4p[Cytoplasm]	LDSV(low density Secretory vesicle)	Arf1p;Sec3p;Sec5p;Sec6p;Sec8p;Sec10p;Sec15p;Exo70p;Exo84p;Sec4p;Chc1p;Clc1p
S000001409[Cytoplasm] + SRPC[Cytoplasm] => S000001409-SRPC[Cytoplasm]	translocation from cytosol to ER (SRP-dependent)	Srp14p;Srp21p;Srp54p;Sec65p;Srp68p;Srp72p
S000001409-SRPC[Cytoplasm] + SRC[Endoplasmic Reticulum] => S000001409-SRPC-SRC[Cytoplasm]	translocation from cytosol to ER (SRP-dependent)	Srp101p;Srp102p
S000001409-SRPC-SRC[Cytoplasm] + 2 GTP[Cytoplasm] + SEC61C[Endoplasmic Reticulum] => S000001409-SRPC-SRC-SEC61C[Cytoplasm]	translocation from cytosol to ER (SRP-dependent)	Sec61p;Sbh1p;Sss1p;Ssh1p
S000001409-SRPC-SRC-SEC61C[Cytoplasm] => S000001409-SEC61C[Cytoplasm] + Srp14p[Cytoplasm] + Srp21p[Cytoplasm] + Srp68p[Cytoplasm] + Sec65p[Cytoplasm] + Srp72p[Cytoplasm] + scR1[Cytoplasm] + Srp54p[Cytoplasm] + Srp51p[Cytoplasm] + Srp52p[Cytoplasm] + 2 GDP[Cytoplasm] + 2 pi[Cytoplasm]	translocation from cytosol to ER (SRP-dependent)
S000001409-SEC61C[Cytoplasm] + SPC[Endoplasmic Reticulum] => S000001409[Endoplasmic Reticulum] + Sec61p[Endoplasmic Reticulum] + Sbh1p[Endoplasmic Reticulum] + Sss1p[Endoplasmic Reticulum] + Sec11p[Endoplasmic Reticulum] + Spc1p[Endoplasmic Reticulum] + Spc2p[Endoplasmic Reticulum] + Spc3p[Endoplasmic Reticulum] + sp[Cytoplasm]	translocation from cytosol to ER (SRP-dependent)	Sec11p;Spc1p;Spc2p;Spc3p
S000001409-SEC61C[Endoplasmic Reticulum] + 6 Dol-pp-GlcNAc(2)man(9)-Glc(3)[Endoplasmic Reticulum] + OSTC[Endoplasmic Reticulum] => S000001409-G1-SEC61C[Endoplasmic Reticulum] + 6 Dol-ppEndoplasmic Reticulum] + Ost1p[Endoplasmic Reticulum] + Ost2p[Endoplasmic Reticulum] + St3p[Endoplasmic Reticulum] + Ost4p[Endoplasmic Reticulum] + Ost5p[Endoplasmic Reticulum] + Ost6p[Endoplasmic Reticulum] + Stt3…	ER N-glycosylation	Stt3p;Ost1p;Wbp1p;OSt3p;Ost6p;Swp1p;Ost2p;Ost5p;Ost4p
S000001409-G1-SEC61C[Endoplasmic Reticulum] => S000001409-G1[Endoplasmic Reticulum] + SEC61C[Endoplasmic Reticulum]	protein folding
S000001409-G1[Endoplasmic Reticulum] => S000001409-G2[Endoplasmic Reticulum] + Glc[Endoplasmic Reticulum]	protein folding	Cwh41p
S000001409-G2[Endoplasmic Reticulum] => S000001409-G3[Endoplasmic Reticulum] + Glc[Endoplasmic Reticulum]	protein folding	Rot2p
S000001409-G3[Endoplasmic Reticulum] => S000001409-G4[Endoplasmic Reticulum] + Glc[Endoplasmic Reticulum]	protein folding	Rot2p
S000001409-G4[Endoplasmic Reticulum] => S000001409-G5[Endoplasmic Reticulum] + man[Endoplasmic Reticulum]	protein folding	Mns1p
S000001409-G5[Endoplasmic Reticulum] + 5 Kar2p[Endoplasmic Reticulum] + 5 ATP[Endoplasmic Reticulum] + 5 Scj1p[Endoplasmic Reticulum] + 5 Jem1p[Endoplasmic Reticulum] + 5 Sec63p[Endoplasmic Reticulum] => S000001409-G5-Kar2ATPcplx[Endoplasmic Reticulum]	protein folding	Kar2p;Scj1p;Jem1p;Sec63p
S000001409-G5-Kar2ATPcplx-[Endoplasmic Reticulum] => S000001409-F-G5-Kar2ADPcplx[Endoplasmic Reticulum] + 5 Scj1p[Endoplasmic Reticulum] + 5 Jem1p[Endoplasmic Reticulum] + 5 pi[Endoplasmic Reticulum] + Sec63p[Endoplasmic Reticulum]	protein folding
S000001409-F-G5-Kar2ADPcplx[Endoplasmic Reticulum] + 5 Sil1p[Endoplasmic Reticulum] + 5 Lhs1p[Endoplasmic Reticulum] + 5 ATP[Endoplasmic Reticulum] => S000001409-F-G5[Endoplasmic Reticulum] + 5 Sil1p[Endoplasmic Reticulum] + 5 Lhs1p[Endoplasmic Reticulum] + 5 ADP[Endoplasmic Reticulum] + 5 Kar2p[Endoplasmic Reticulum] protein folding	protein folding	Lhs1p;Sil1p
S000001409-F-G5[Endoplasmic Reticulum] + Sar1-GTP[Endoplasmic Reticulum] + Sec23-Sec24C[Cytoplasm] + Bet1p[Endoplasmic Reticulum] + Bos1p[Endoplasmic Reticulum] => S000001409-F-G5-COPII-pbud-cplx[Endoplasmic Reticulum]	COPII (for transmembrane cargo)	Sar1p;Sec23p;Sec24p;Bet1p;Bos1p
S000001409-F-G7orG5-COPII-pbud-cplx[Endoplasmic Reticulum] + Sec13-Sec31C[Cytoplasm] + Sec16p[Endoplasmic Reticulum] + Sed4p[Endoplasmic Reticulum] + Sec17p[Endoplasmic Reticulum] => S000001409-F-G5orG7-COPII[COPII]	COPII(common	Sec13p;Sec31p;Sec16p;Sed4p;Sec17p;Sec22p
S000001409-F-G5-COPII[COPII] + TRAPPIC[COPII] + Ypt1p[COPII] + GTP[COPII] => S000001409-F-G5[Golgi] + sar1-GDP[Cytoplasm] + pi[Cytoplasm] + Sec13-Sec31C[Cytoplasm] + Sec16p[Cytoplasm] + Sec12-Sed24C[Cytoplasm] + Bet3p[Cytoplasm] + Bet5p[Cytoplasm] + Trs20p[Cytoplasm] + Trs23p[Cytoplasm] + Trs31p[Cytoplasm] + Trs33p[Cytoplasm] + Bet1p[Endoplasmic Reticulum] + Bos1p[Endoplasmic Reticulum]	COPII (for transmembrane cargo)	Ypt1p;Uso1p;bug1p;Bet3p;Bet5p;Trs20p;Trs23p;Trs31p;Trs33p
S000001409-misf-G8-cplx[Endoplasmic Reticulum] + 0.1 Hrd1p[Endoplasmic Reticulum] => S000001409-misf-G8-HRDcplx[Endoplasmic Reticulum]	ERADM	Hrd1p
S000001409-misf-G8-HRDcplx[Endoplasmic Reticulum] + 0.1 Ubc7p[Cytoplasm] + 0.1 Cue1p[Cytoplasm] + 0.1 AAAC[Cytoplasm] => S000001409-misf-G8-UBcplx[Endoplasmic Reticulum] + 0.1 Hrd1p[Endoplasmic Reticulum] + 0.1 Usa1p[Endoplasmic Reticulum] + 0.1 Der1p[Endoplasmic Reticulum]	ERADM	Ubc7p; Cue1p;Usa1p; Der1p
S000001409-misf-G8-UBcplx[Endoplasmic Reticulum] + 5 ATP[Cytoplasm] + 5 Ubiquitin[Cytoplasm] => S000001409-misf-G8-Ubiquitin[Cytoplasm] + Ubc7p[Cytoplasm] + 0.1 Cue1p[Cytoplasm] + 0.1 Ubx2p[Endoplasmic Reticulum] + 0.1 Cdc48p[Cytoplasm] + 0.1 Ufd1p[Cytoplasm] + 0.1 Npl4p[Cytoplasm] + 0.1 Usa1p[Endoplasmic Reticulum] + 0.1 Der1p[Endoplasmic Reticulum] + 5 AMP[Cytoplasm] + 5 ppi[Cytoplasm]	ERADM	Ubx2p; Cdc48p; Ufd1p;Npl4p;Ubiquitin
S000001409-misf-G8-Ubiquitin[Cytoplasm] + 0.1 Dsk2p[Cytoplasm] + 0.1 Rad23p[Cytoplasm] + 0.1 Png1p[Cytoplasm] + 5 ATP[Cytoplasm] + 0.1 26sproteosome[Cytoplasm] + 5 H2O[Cytoplasm] => G8[Cytoplasm] + 5 Ubiquitin[Cytoplasm] + 5 ADP[Cytoplasm] + 5 pi[Cytoplasm] + S000001409aa[Cytoplasm]	ERADM	Png1p;26sproteosome
S000001409-G5orG7[Golgi] + GDP-man[Golgi] => S000001409-G9[Golgi] + GDP[Golgi]	Golgi processing	Och1p
S000001409-G9[Golgi] + 5 GDP-man[Golgi] => S000001409-G10[Golgi] + 5 GDP[Golgi]	Golgi processing	Mnn9p;Van1p
S000001409-G10[Golgi] + 40 GDP-man[Golgi] => S000001409-G11[Golgi] + 40 GDP[Golgi]	Golgi processing	Anp1p;Mnn9p;Mnn10p;Mnn11p;Hoc1p
S000001409-G15[Golgi] => S000001409-G16[Golgi] + aminoacid[Golgi]	Golgi processing	Kex1p;Kex2p;Ste13p
S000001409-M1[Golgi] + GTP[Cytoplasm] + clathrinC[Cytoplasm] + Arf1p[Cytoplasm] + EXOC[Cytoplasm] => S000001409-M1[cell membrane] + GDP[Golgi] + 2 Chc1p[Cytoplasm] + Clc1p[Cytoplasm] + Arf1p[Cytoplasm] + Sec3p[Cytoplasm] + Sec5p[Cytoplasm] + Sec6p[Cytoplasm] + Sec8p[Cytoplasm] + Sec10p[Cytoplasm] + Sec15p[Cytoplasm] + Exo70p[Cytoplasm] + Exo84p[Cytoplasm] + Sec4p[Cytoplasm]	LDSV(low density Secretory vesicle)	Arf1p;Sec3p;Sec5p;Sec6p;Sec8p;Sec10p;Sec15p;Exo70p;Exo84p;Sec4p;Chc1p;Clc1p
S000004204[Cytoplasm] + SRPC[Cytoplasm] => S000004204-SRPC[Cytoplasm]	translocation from cytosol to ER (SRP-dependent)	Srp14p;Srp21p;Srp54p;Sec65p;Srp68p;Srp72p
S000004204-SRPC[Cytoplasm] + SRC[Endoplasmic Reticulum] => S000004204-SRPC-SRC[Cytoplasm]	translocation from cytosol to ER (SRP-dependent)	Srp101p;Srp102p
S000004204-SRPC-SRC[Cytoplasm] + 2 GTP[Cytoplasm] + SEC61C[Endoplasmic Reticulum] => S000004204-SRPC-SRC-SEC61C[Cytoplasm]	translocation from cytosol to ER (SRP-dependent)	Sec61p;Sbh1p;Sss1p;Ssh1p
S000004204-SRPC-SRC-SEC61C[Cytoplasm] => S000004204-SEC61C[Cytoplasm] + Srp14p[Cytoplasm] + Srp21p[Cytoplasm] + Srp68p[Cytoplasm] + Sec65p[Cytoplasm] + Srp72p[Cytoplasm] + scR1[Cytoplasm] + Srp54p[Cytoplasm] + Srp51p[Cytoplasm] + Srp52p[Cytoplasm] + 2 GDP[Cytoplasm] + 2 pi[Cytoplasm]	translocation from cytosol to ER (SRP-dependent)
S000004204-SEC61C[Cytoplasm] + SPC[Endoplasmic Reticulum] => S000004204[Endoplasmic Reticulum] + Sec61p[Endoplasmic Reticulum] + Sbh1p[Endoplasmic Reticulum] + Sss1p[Endoplasmic Reticulum] + Sec11p[Endoplasmic Reticulum] + Spc1p[Endoplasmic Reticulum] + Spc2p[Endoplasmic Reticulum] + Spc3p[Endoplasmic Reticulum] + sp[Cytoplasm]	translocation from cytosol to ER (SRP-dependent)	Sec11p;Spc1p;Spc2p;Spc3p
S000004204-SEC61C[Endoplasmic Reticulum] + 3 Dol-pp-GlcNAc(2)man(9)-Glc(3)[Endoplasmic Reticulum] + OSTC[Endoplasmic Reticulum] => S000004204-G1-SEC61C[Endoplasmic Reticulum] + 3 Dol-ppEndoplasmic Reticulum] + Ost1p[Endoplasmic Reticulum] + Ost2p[Endoplasmic Reticulum] + St3p[Endoplasmic Reticulum] + Ost4p[Endoplasmic Reticulum] + Ost5p[Endoplasmic Reticulum] + Ost6p[Endoplasmic Reticulum] + Stt3…	ER N-glycosylation	Stt3p;Ost1p;Wbp1p;OSt3p;Ost6p;Swp1p;Ost2p;Ost5p;Ost4p
S000004204-G1-SEC61C[Endoplasmic Reticulum] => S000004204-G1[Endoplasmic Reticulum] + SEC61C[Endoplasmic Reticulum]	protein folding
S000004204-G1[Endoplasmic Reticulum] => S000004204-G2[Endoplasmic Reticulum] + Glc[Endoplasmic Reticulum]	protein folding	Cwh41p
S000004204-G2[Endoplasmic Reticulum] => S000004204-G3[Endoplasmic Reticulum] + Glc[Endoplasmic Reticulum]	protein folding	Rot2p
S000004204-G3[Endoplasmic Reticulum] => S000004204-G4[Endoplasmic Reticulum] + Glc[Endoplasmic Reticulum]	protein folding	Rot2p
S000004204-G4[Endoplasmic Reticulum] => S000004204-G5[Endoplasmic Reticulum] + man[Endoplasmic Reticulum]	protein folding	Mns1p
S000004204-G5[Endoplasmic Reticulum] + 5 Kar2p[Endoplasmic Reticulum] + 5 ATP[Endoplasmic Reticulum] + 5 Scj1p[Endoplasmic Reticulum] + 5 Jem1p[Endoplasmic Reticulum] + 5 Sec63p[Endoplasmic Reticulum] => S000004204-G5-Kar2ATPcplx[Endoplasmic Reticulum]	protein folding	Kar2p;Scj1p;Jem1p;Sec63p
S000004204-G5-Kar2ATPcplx-[Endoplasmic Reticulum] => S000004204-F-G5-Kar2ADPcplx[Endoplasmic Reticulum] + 5 Scj1p[Endoplasmic Reticulum] + 5 Jem1p[Endoplasmic Reticulum] + 5 pi[Endoplasmic Reticulum] + Sec63p[Endoplasmic Reticulum]	protein folding
S000004204-F-G5-Kar2ADPcplx[Endoplasmic Reticulum] + 5 Sil1p[Endoplasmic Reticulum] + 5 Lhs1p[Endoplasmic Reticulum] + 5 ATP[Endoplasmic Reticulum] => S000004204-F-G5[Endoplasmic Reticulum] + 5 Sil1p[Endoplasmic Reticulum] + 5 Lhs1p[Endoplasmic Reticulum] + 5 ADP[Endoplasmic Reticulum] + 5 Kar2p[Endoplasmic Reticulum] protein folding	protein folding	Lhs1p;Sil1p
S000004204-F-G5[Endoplasmic Reticulum] + Sar1-GTP[Endoplasmic Reticulum] + Sec23-Sec24C[Cytoplasm] + Bet1p[Endoplasmic Reticulum] + Bos1p[Endoplasmic Reticulum] => S000004204-F-G5-COPII-pbud-cplx[Endoplasmic Reticulum]	COPII (for transmembrane cargo)	Sar1p;Sec23p;Sec24p;Bet1p;Bos1p
S000004204-F-G7orG5-COPII-pbud-cplx[Endoplasmic Reticulum] + Sec13-Sec31C[Cytoplasm] + Sec16p[Endoplasmic Reticulum] + Sed4p[Endoplasmic Reticulum] + Sec17p[Endoplasmic Reticulum] => S000004204-F-G5orG7-COPII[COPII]	COPII(common	Sec13p;Sec31p;Sec16p;Sed4p;Sec17p;Sec22p
S000004204-F-G5-COPII[COPII] + TRAPPIC[COPII] + Ypt1p[COPII] + GTP[COPII] => S000004204-F-G5[Golgi] + sar1-GDP[Cytoplasm] + pi[Cytoplasm] + Sec13-Sec31C[Cytoplasm] + Sec16p[Cytoplasm] + Sec12-Sed24C[Cytoplasm] + Bet3p[Cytoplasm] + Bet5p[Cytoplasm] + Trs20p[Cytoplasm] + Trs23p[Cytoplasm] + Trs31p[Cytoplasm] + Trs33p[Cytoplasm] + Bet1p[Endoplasmic Reticulum] + Bos1p[Endoplasmic Reticulum]	COPII (for transmembrane cargo)	Ypt1p;Uso1p;bug1p;Bet3p;Bet5p;Trs20p;Trs23p;Trs31p;Trs33p
S000004204-misf-G8-cplx[Endoplasmic Reticulum] + 0.1 Hrd1p[Endoplasmic Reticulum] => S000004204-misf-G8-HRDcplx[Endoplasmic Reticulum]	ERADM	Hrd1p
S000004204-misf-G8-HRDcplx[Endoplasmic Reticulum] + 0.1 Ubc7p[Cytoplasm] + 0.1 Cue1p[Cytoplasm] + 0.1 AAAC[Cytoplasm] => S000004204-misf-G8-UBcplx[Endoplasmic Reticulum] + 0.1 Hrd1p[Endoplasmic Reticulum] + 0.1 Usa1p[Endoplasmic Reticulum] + 0.1 Der1p[Endoplasmic Reticulum]	ERADM	Ubc7p; Cue1p;Usa1p; Der1p
S000004204-misf-G8-UBcplx[Endoplasmic Reticulum] + 5 ATP[Cytoplasm] + 5 Ubiquitin[Cytoplasm] => S000004204-misf-G8-Ubiquitin[Cytoplasm] + Ubc7p[Cytoplasm] + 0.1 Cue1p[Cytoplasm] + 0.1 Ubx2p[Endoplasmic Reticulum] + 0.1 Cdc48p[Cytoplasm] + 0.1 Ufd1p[Cytoplasm] + 0.1 Npl4p[Cytoplasm] + 0.1 Usa1p[Endoplasmic Reticulum] + 0.1 Der1p[Endoplasmic Reticulum] + 5 AMP[Cytoplasm] + 5 ppi[Cytoplasm]	ERADM	Ubx2p; Cdc48p; Ufd1p;Npl4p;Ubiquitin
S000004204-misf-G8-Ubiquitin[Cytoplasm] + 0.1 Dsk2p[Cytoplasm] + 0.1 Rad23p[Cytoplasm] + 0.1 Png1p[Cytoplasm] + 5 ATP[Cytoplasm] + 0.1 26sproteosome[Cytoplasm] + 5 H2O[Cytoplasm] => G8[Cytoplasm] + 5 Ubiquitin[Cytoplasm] + 5 ADP[Cytoplasm] + 5 pi[Cytoplasm] + S000004204aa[Cytoplasm]	ERADM	Png1p;26sproteosome
S000004204-G5orG7[Golgi] + GDP-man[Golgi] => S000004204-G9[Golgi] + GDP[Golgi]	Golgi processing	Och1p
S000004204-G9[Golgi] + 5 GDP-man[Golgi] => S000004204-G10[Golgi] + 5 GDP[Golgi]	Golgi processing	Mnn9p;Van1p
S000004204-G10[Golgi] + 40 GDP-man[Golgi] => S000004204-G11[Golgi] + 40 GDP[Golgi]	Golgi processing	Anp1p;Mnn9p;Mnn10p;Mnn11p;Hoc1p
S000004204-G15[Golgi] => S000004204-G16[Golgi] + aminoacid[Golgi]	Golgi processing	Kex1p;Kex2p;Ste13p
S000004204-M1[Golgi] + GTP[Cytoplasm] + clathrinC[Cytoplasm] + Arf1p[Cytoplasm] + EXOC[Cytoplasm] => S000004204-M1[cell membrane] + GDP[Golgi] + 2 Chc1p[Cytoplasm] + Clc1p[Cytoplasm] + Arf1p[Cytoplasm] + Sec3p[Cytoplasm] + Sec5p[Cytoplasm] + Sec6p[Cytoplasm] + Sec8p[Cytoplasm] + Sec10p[Cytoplasm] + Sec15p[Cytoplasm] + Exo70p[Cytoplasm] + Exo84p[Cytoplasm] + Sec4p[Cytoplasm]	LDSV(low density Secretory vesicle)	Arf1p;Sec3p;Sec5p;Sec6p;Sec8p;Sec10p;Sec15p;Exo70p;Exo84p;Sec4p;Chc1p;Clc1p
S000001703[Cytoplasm] + SRPC[Cytoplasm] => S000001703-SRPC[Cytoplasm]	translocation from cytosol to ER (SRP-dependent)	Srp14p;Srp21p;Srp54p;Sec65p;Srp68p;Srp72p
S000001703-SRPC[Cytoplasm] + SRC[Endoplasmic Reticulum] => S000001703-SRPC-SRC[Cytoplasm]	translocation from cytosol to ER (SRP-dependent)	Srp101p;Srp102p
S000001703-SRPC-SRC[Cytoplasm] + 2 GTP[Cytoplasm] + SEC61C[Endoplasmic Reticulum] => S000001703-SRPC-SRC-SEC61C[Cytoplasm]	translocation from cytosol to ER (SRP-dependent)	Sec61p;Sbh1p;Sss1p;Ssh1p
S000001703-SRPC-SRC-SEC61C[Cytoplasm] => S000001703-SEC61C[Cytoplasm] + Srp14p[Cytoplasm] + Srp21p[Cytoplasm] + Srp68p[Cytoplasm] + Sec65p[Cytoplasm] + Srp72p[Cytoplasm] + scR1[Cytoplasm] + Srp54p[Cytoplasm] + Srp51p[Cytoplasm] + Srp52p[Cytoplasm] + 2 GDP[Cytoplasm] + 2 pi[Cytoplasm]	translocation from cytosol to ER (SRP-dependent)
S000001703-SEC61C[Cytoplasm] + SPC[Endoplasmic Reticulum] => S000001703[Endoplasmic Reticulum] + Sec61p[Endoplasmic Reticulum] + Sbh1p[Endoplasmic Reticulum] + Sss1p[Endoplasmic Reticulum] + Sec11p[Endoplasmic Reticulum] + Spc1p[Endoplasmic Reticulum] + Spc2p[Endoplasmic Reticulum] + Spc3p[Endoplasmic Reticulum] + sp[Cytoplasm]	translocation from cytosol to ER (SRP-dependent)	Sec11p;Spc1p;Spc2p;Spc3p
S000001703-SEC61C[Endoplasmic Reticulum] + 5 Dol-pp-GlcNAc(2)man(9)-Glc(3)[Endoplasmic Reticulum] + OSTC[Endoplasmic Reticulum] => S000001703-G1-SEC61C[Endoplasmic Reticulum] + 5 Dol-ppEndoplasmic Reticulum] + Ost1p[Endoplasmic Reticulum] + Ost2p[Endoplasmic Reticulum] + St3p[Endoplasmic Reticulum] + Ost4p[Endoplasmic Reticulum] + Ost5p[Endoplasmic Reticulum] + Ost6p[Endoplasmic Reticulum] + Stt3…	ER N-glycosylation	Stt3p;Ost1p;Wbp1p;OSt3p;Ost6p;Swp1p;Ost2p;Ost5p;Ost4p
S000001703-G1-SEC61C[Endoplasmic Reticulum] => S000001703-G1[Endoplasmic Reticulum] + SEC61C[Endoplasmic Reticulum]	protein folding
S000001703-G1[Endoplasmic Reticulum] => S000001703-G2[Endoplasmic Reticulum] + Glc[Endoplasmic Reticulum]	protein folding	Cwh41p
S000001703-G2[Endoplasmic Reticulum] => S000001703-G3[Endoplasmic Reticulum] + Glc[Endoplasmic Reticulum]	protein folding	Rot2p
S000001703-G3[Endoplasmic Reticulum] => S000001703-G4[Endoplasmic Reticulum] + Glc[Endoplasmic Reticulum]	protein folding	Rot2p
S000001703-G4[Endoplasmic Reticulum] => S000001703-G5[Endoplasmic Reticulum] + man[Endoplasmic Reticulum]	protein folding	Mns1p
S000001703-G5[Endoplasmic Reticulum] + 5 Kar2p[Endoplasmic Reticulum] + 5 ATP[Endoplasmic Reticulum] + 5 Scj1p[Endoplasmic Reticulum] + 5 Jem1p[Endoplasmic Reticulum] + 5 Sec63p[Endoplasmic Reticulum] => S000001703-G5-Kar2ATPcplx[Endoplasmic Reticulum]	protein folding	Kar2p;Scj1p;Jem1p;Sec63p
S000001703-G5-Kar2ATPcplx-[Endoplasmic Reticulum] => S000001703-F-G5-Kar2ADPcplx[Endoplasmic Reticulum] + 5 Scj1p[Endoplasmic Reticulum] + 5 Jem1p[Endoplasmic Reticulum] + 5 pi[Endoplasmic Reticulum] + Sec63p[Endoplasmic Reticulum]	protein folding
S000001703-F-G5-Kar2ADPcplx[Endoplasmic Reticulum] + 5 Sil1p[Endoplasmic Reticulum] + 5 Lhs1p[Endoplasmic Reticulum] + 5 ATP[Endoplasmic Reticulum] => S000001703-F-G5[Endoplasmic Reticulum] + 5 Sil1p[Endoplasmic Reticulum] + 5 Lhs1p[Endoplasmic Reticulum] + 5 ADP[Endoplasmic Reticulum] + 5 Kar2p[Endoplasmic Reticulum] protein folding	protein folding	Lhs1p;Sil1p
S000001703-F-G5[Endoplasmic Reticulum] + Sar1-GTP[Endoplasmic Reticulum] + Sec23-Sec24C[Cytoplasm] + Bet1p[Endoplasmic Reticulum] + Bos1p[Endoplasmic Reticulum] => S000001703-F-G5-COPII-pbud-cplx[Endoplasmic Reticulum]	COPII (for transmembrane cargo)	Sar1p;Sec23p;Sec24p;Bet1p;Bos1p
S000001703-F-G7orG5-COPII-pbud-cplx[Endoplasmic Reticulum] + Sec13-Sec31C[Cytoplasm] + Sec16p[Endoplasmic Reticulum] + Sed4p[Endoplasmic Reticulum] + Sec17p[Endoplasmic Reticulum] => S000001703-F-G5orG7-COPII[COPII]	COPII(common	Sec13p;Sec31p;Sec16p;Sed4p;Sec17p;Sec22p
S000001703-F-G5-COPII[COPII] + TRAPPIC[COPII] + Ypt1p[COPII] + GTP[COPII] => S000001703-F-G5[Golgi] + sar1-GDP[Cytoplasm] + pi[Cytoplasm] + Sec13-Sec31C[Cytoplasm] + Sec16p[Cytoplasm] + Sec12-Sed24C[Cytoplasm] + Bet3p[Cytoplasm] + Bet5p[Cytoplasm] + Trs20p[Cytoplasm] + Trs23p[Cytoplasm] + Trs31p[Cytoplasm] + Trs33p[Cytoplasm] + Bet1p[Endoplasmic Reticulum] + Bos1p[Endoplasmic Reticulum]	COPII (for transmembrane cargo)	Ypt1p;Uso1p;bug1p;Bet3p;Bet5p;Trs20p;Trs23p;Trs31p;Trs33p
S000001703-misf-G8-cplx[Endoplasmic Reticulum] + 0.1 Hrd1p[Endoplasmic Reticulum] => S000001703-misf-G8-HRDcplx[Endoplasmic Reticulum]	ERADM	Hrd1p
S000001703-misf-G8-HRDcplx[Endoplasmic Reticulum] + 0.1 Ubc7p[Cytoplasm] + 0.1 Cue1p[Cytoplasm] + 0.1 AAAC[Cytoplasm] => S000001703-misf-G8-UBcplx[Endoplasmic Reticulum] + 0.1 Hrd1p[Endoplasmic Reticulum] + 0.1 Usa1p[Endoplasmic Reticulum] + 0.1 Der1p[Endoplasmic Reticulum]	ERADM	Ubc7p; Cue1p;Usa1p; Der1p
S000001703-misf-G8-UBcplx[Endoplasmic Reticulum] + 5 ATP[Cytoplasm] + 5 Ubiquitin[Cytoplasm] => S000001703-misf-G8-Ubiquitin[Cytoplasm] + Ubc7p[Cytoplasm] + 0.1 Cue1p[Cytoplasm] + 0.1 Ubx2p[Endoplasmic Reticulum] + 0.1 Cdc48p[Cytoplasm] + 0.1 Ufd1p[Cytoplasm] + 0.1 Npl4p[Cytoplasm] + 0.1 Usa1p[Endoplasmic Reticulum] + 0.1 Der1p[Endoplasmic Reticulum] + 5 AMP[Cytoplasm] + 5 ppi[Cytoplasm]	ERADM	Ubx2p; Cdc48p; Ufd1p;Npl4p;Ubiquitin
S000001703-misf-G8-Ubiquitin[Cytoplasm] + 0.1 Dsk2p[Cytoplasm] + 0.1 Rad23p[Cytoplasm] + 0.1 Png1p[Cytoplasm] + 5 ATP[Cytoplasm] + 0.1 26sproteosome[Cytoplasm] + 5 H2O[Cytoplasm] => G8[Cytoplasm] + 5 Ubiquitin[Cytoplasm] + 5 ADP[Cytoplasm] + 5 pi[Cytoplasm] + S000001703aa[Cytoplasm]	ERADM	Png1p;26sproteosome
S000001703-G5orG7[Golgi] + GDP-man[Golgi] => S000001703-G9[Golgi] + GDP[Golgi]	Golgi processing	Och1p
S000001703-G9[Golgi] + 5 GDP-man[Golgi] => S000001703-G10[Golgi] + 5 GDP[Golgi]	Golgi processing	Mnn9p;Van1p
S000001703-G10[Golgi] + 40 GDP-man[Golgi] => S000001703-G11[Golgi] + 40 GDP[Golgi]	Golgi processing	Anp1p;Mnn9p;Mnn10p;Mnn11p;Hoc1p
S000001703-G15[Golgi] => S000001703-G16[Golgi] + aminoacid[Golgi]	Golgi processing	Kex1p;Kex2p;Ste13p
S000001703-M1[Golgi] + GTP[Cytoplasm] + clathrinC[Cytoplasm] + Arf1p[Cytoplasm] + EXOC[Cytoplasm] => S000001703-M1[cell membrane] + GDP[Golgi] + 2 Chc1p[Cytoplasm] + Clc1p[Cytoplasm] + Arf1p[Cytoplasm] + Sec3p[Cytoplasm] + Sec5p[Cytoplasm] + Sec6p[Cytoplasm] + Sec8p[Cytoplasm] + Sec10p[Cytoplasm] + Sec15p[Cytoplasm] + Exo70p[Cytoplasm] + Exo84p[Cytoplasm] + Sec4p[Cytoplasm]	LDSV(low density Secretory vesicle)	Arf1p;Sec3p;Sec5p;Sec6p;Sec8p;Sec10p;Sec15p;Exo70p;Exo84p;Sec4p;Chc1p;Clc1p
S000005908[Cytoplasm] + SRPC[Cytoplasm] => S000005908-SRPC[Cytoplasm]	translocation from cytosol to ER (SRP-dependent)	Srp14p;Srp21p;Srp54p;Sec65p;Srp68p;Srp72p
S000005908-SRPC[Cytoplasm] + SRC[Endoplasmic Reticulum] => S000005908-SRPC-SRC[Cytoplasm]	translocation from cytosol to ER (SRP-dependent)	Srp101p;Srp102p
S000005908-SRPC-SRC[Cytoplasm] + 2 GTP[Cytoplasm] + SEC61C[Endoplasmic Reticulum] => S000005908-SRPC-SRC-SEC61C[Cytoplasm]	translocation from cytosol to ER (SRP-dependent)	Sec61p;Sbh1p;Sss1p;Ssh1p
S000005908-SRPC-SRC-SEC61C[Cytoplasm] => S000005908-SEC61C[Cytoplasm] + Srp14p[Cytoplasm] + Srp21p[Cytoplasm] + Srp68p[Cytoplasm] + Sec65p[Cytoplasm] + Srp72p[Cytoplasm] + scR1[Cytoplasm] + Srp54p[Cytoplasm] + Srp51p[Cytoplasm] + Srp52p[Cytoplasm] + 2 GDP[Cytoplasm] + 2 pi[Cytoplasm]	translocation from cytosol to ER (SRP-dependent)
S000005908-SEC61C[Cytoplasm] + SPC[Endoplasmic Reticulum] => S000005908[Endoplasmic Reticulum] + Sec61p[Endoplasmic Reticulum] + Sbh1p[Endoplasmic Reticulum] + Sss1p[Endoplasmic Reticulum] + Sec11p[Endoplasmic Reticulum] + Spc1p[Endoplasmic Reticulum] + Spc2p[Endoplasmic Reticulum] + Spc3p[Endoplasmic Reticulum] + sp[Cytoplasm]	translocation from cytosol to ER (SRP-dependent)	Sec11p;Spc1p;Spc2p;Spc3p
S000005908-SEC61C[Endoplasmic Reticulum] + 4 Dol-pp-GlcNAc(2)man(9)-Glc(3)[Endoplasmic Reticulum] + OSTC[Endoplasmic Reticulum] => S000005908-G1-SEC61C[Endoplasmic Reticulum] + 4 Dol-ppEndoplasmic Reticulum] + Ost1p[Endoplasmic Reticulum] + Ost2p[Endoplasmic Reticulum] + St3p[Endoplasmic Reticulum] + Ost4p[Endoplasmic Reticulum] + Ost5p[Endoplasmic Reticulum] + Ost6p[Endoplasmic Reticulum] + Stt3…	ER N-glycosylation	Stt3p;Ost1p;Wbp1p;OSt3p;Ost6p;Swp1p;Ost2p;Ost5p;Ost4p
S000005908-G1-SEC61C[Endoplasmic Reticulum] => S000005908-G1[Endoplasmic Reticulum] + SEC61C[Endoplasmic Reticulum]	protein folding
S000005908-G1[Endoplasmic Reticulum] => S000005908-G2[Endoplasmic Reticulum] + Glc[Endoplasmic Reticulum]	protein folding	Cwh41p
S000005908-G2[Endoplasmic Reticulum] => S000005908-G3[Endoplasmic Reticulum] + Glc[Endoplasmic Reticulum]	protein folding	Rot2p
S000005908-G3[Endoplasmic Reticulum] => S000005908-G4[Endoplasmic Reticulum] + Glc[Endoplasmic Reticulum]	protein folding	Rot2p
S000005908-G4[Endoplasmic Reticulum] => S000005908-G5[Endoplasmic Reticulum] + man[Endoplasmic Reticulum]	protein folding	Mns1p
S000005908-G5[Endoplasmic Reticulum] + 5 Kar2p[Endoplasmic Reticulum] + 5 ATP[Endoplasmic Reticulum] + 5 Scj1p[Endoplasmic Reticulum] + 5 Jem1p[Endoplasmic Reticulum] + 5 Sec63p[Endoplasmic Reticulum] => S000005908-G5-Kar2ATPcplx[Endoplasmic Reticulum]	protein folding	Kar2p;Scj1p;Jem1p;Sec63p
S000005908-G5-Kar2ATPcplx-[Endoplasmic Reticulum] => S000005908-F-G5-Kar2ADPcplx[Endoplasmic Reticulum] + 5 Scj1p[Endoplasmic Reticulum] + 5 Jem1p[Endoplasmic Reticulum] + 5 pi[Endoplasmic Reticulum] + Sec63p[Endoplasmic Reticulum]	protein folding
S000005908-F-G5-Kar2ADPcplx[Endoplasmic Reticulum] + 5 Sil1p[Endoplasmic Reticulum] + 5 Lhs1p[Endoplasmic Reticulum] + 5 ATP[Endoplasmic Reticulum] => S000005908-F-G5[Endoplasmic Reticulum] + 5 Sil1p[Endoplasmic Reticulum] + 5 Lhs1p[Endoplasmic Reticulum] + 5 ADP[Endoplasmic Reticulum] + 5 Kar2p[Endoplasmic Reticulum] protein folding	protein folding	Lhs1p;Sil1p
S000005908-F-G5[Endoplasmic Reticulum] + Sar1-GTP[Endoplasmic Reticulum] + Sec23-Sec24C[Cytoplasm] + Bet1p[Endoplasmic Reticulum] + Bos1p[Endoplasmic Reticulum] => S000005908-F-G5-COPII-pbud-cplx[Endoplasmic Reticulum]	COPII (for transmembrane cargo)	Sar1p;Sec23p;Sec24p;Bet1p;Bos1p
S000005908-F-G7orG5-COPII-pbud-cplx[Endoplasmic Reticulum] + Sec13-Sec31C[Cytoplasm] + Sec16p[Endoplasmic Reticulum] + Sed4p[Endoplasmic Reticulum] + Sec17p[Endoplasmic Reticulum] => S000005908-F-G5orG7-COPII[COPII]	COPII(common	Sec13p;Sec31p;Sec16p;Sed4p;Sec17p;Sec22p
S000005908-F-G5-COPII[COPII] + TRAPPIC[COPII] + Ypt1p[COPII] + GTP[COPII] => S000005908-F-G5[Golgi] + sar1-GDP[Cytoplasm] + pi[Cytoplasm] + Sec13-Sec31C[Cytoplasm] + Sec16p[Cytoplasm] + Sec12-Sed24C[Cytoplasm] + Bet3p[Cytoplasm] + Bet5p[Cytoplasm] + Trs20p[Cytoplasm] + Trs23p[Cytoplasm] + Trs31p[Cytoplasm] + Trs33p[Cytoplasm] + Bet1p[Endoplasmic Reticulum] + Bos1p[Endoplasmic Reticulum]	COPII (for transmembrane cargo)	Ypt1p;Uso1p;bug1p;Bet3p;Bet5p;Trs20p;Trs23p;Trs31p;Trs33p
S000005908-misf-G8-cplx[Endoplasmic Reticulum] + 0.1 Hrd1p[Endoplasmic Reticulum] => S000005908-misf-G8-HRDcplx[Endoplasmic Reticulum]	ERADM	Hrd1p
S000005908-misf-G8-HRDcplx[Endoplasmic Reticulum] + 0.1 Ubc7p[Cytoplasm] + 0.1 Cue1p[Cytoplasm] + 0.1 AAAC[Cytoplasm] => S000005908-misf-G8-UBcplx[Endoplasmic Reticulum] + 0.1 Hrd1p[Endoplasmic Reticulum] + 0.1 Usa1p[Endoplasmic Reticulum] + 0.1 Der1p[Endoplasmic Reticulum]	ERADM	Ubc7p; Cue1p;Usa1p; Der1p
S000005908-misf-G8-UBcplx[Endoplasmic Reticulum] + 5 ATP[Cytoplasm] + 5 Ubiquitin[Cytoplasm] => S000005908-misf-G8-Ubiquitin[Cytoplasm] + Ubc7p[Cytoplasm] + 0.1 Cue1p[Cytoplasm] + 0.1 Ubx2p[Endoplasmic Reticulum] + 0.1 Cdc48p[Cytoplasm] + 0.1 Ufd1p[Cytoplasm] + 0.1 Npl4p[Cytoplasm] + 0.1 Usa1p[Endoplasmic Reticulum] + 0.1 Der1p[Endoplasmic Reticulum] + 5 AMP[Cytoplasm] + 5 ppi[Cytoplasm]	ERADM	Ubx2p; Cdc48p; Ufd1p;Npl4p;Ubiquitin
S000005908-misf-G8-Ubiquitin[Cytoplasm] + 0.1 Dsk2p[Cytoplasm] + 0.1 Rad23p[Cytoplasm] + 0.1 Png1p[Cytoplasm] + 5 ATP[Cytoplasm] + 0.1 26sproteosome[Cytoplasm] + 5 H2O[Cytoplasm] => G8[Cytoplasm] + 5 Ubiquitin[Cytoplasm] + 5 ADP[Cytoplasm] + 5 pi[Cytoplasm] + S000005908aa[Cytoplasm]	ERADM	Png1p;26sproteosome
S000005908-G5orG7[Golgi] + GDP-man[Golgi] => S000005908-G9[Golgi] + GDP[Golgi]	Golgi processing	Och1p
S000005908-G9[Golgi] + 5 GDP-man[Golgi] => S000005908-G10[Golgi] + 5 GDP[Golgi]	Golgi processing	Mnn9p;Van1p
S000005908-G10[Golgi] + 40 GDP-man[Golgi] => S000005908-G11[Golgi] + 40 GDP[Golgi]	Golgi processing	Anp1p;Mnn9p;Mnn10p;Mnn11p;Hoc1p
S000005908-G15[Golgi] => S000005908-G16[Golgi] + aminoacid[Golgi]	Golgi processing	Kex1p;Kex2p;Ste13p
S000005908-M1[Golgi] + GTP[Cytoplasm] + clathrinC[Cytoplasm] + Arf1p[Cytoplasm] + EXOC[Cytoplasm] => S000005908-M1[cell membrane] + GDP[Golgi] + 2 Chc1p[Cytoplasm] + Clc1p[Cytoplasm] + Arf1p[Cytoplasm] + Sec3p[Cytoplasm] + Sec5p[Cytoplasm] + Sec6p[Cytoplasm] + Sec8p[Cytoplasm] + Sec10p[Cytoplasm] + Sec15p[Cytoplasm] + Exo70p[Cytoplasm] + Exo84p[Cytoplasm] + Sec4p[Cytoplasm]	LDSV(low density Secretory vesicle)	Arf1p;Sec3p;Sec5p;Sec6p;Sec8p;Sec10p;Sec15p;Exo70p;Exo84p;Sec4p;Chc1p;Clc1p
S000000610[Cytoplasm] + SRPC[Cytoplasm] => S000000610-SRPC[Cytoplasm]	translocation from cytosol to ER (SRP-dependent)	Srp14p;Srp21p;Srp54p;Sec65p;Srp68p;Srp72p
S000000610-SRPC[Cytoplasm] + SRC[Endoplasmic Reticulum] => S000000610-SRPC-SRC[Cytoplasm]	translocation from cytosol to ER (SRP-dependent)	Srp101p;Srp102p
S000000610-SRPC-SRC[Cytoplasm] + 2 GTP[Cytoplasm] + SEC61C[Endoplasmic Reticulum] => S000000610-SRPC-SRC-SEC61C[Cytoplasm]	translocation from cytosol to ER (SRP-dependent)	Sec61p;Sbh1p;Sss1p;Ssh1p
S000000610-SRPC-SRC-SEC61C[Cytoplasm] => S000000610-SEC61C[Cytoplasm] + Srp14p[Cytoplasm] + Srp21p[Cytoplasm] + Srp68p[Cytoplasm] + Sec65p[Cytoplasm] + Srp72p[Cytoplasm] + scR1[Cytoplasm] + Srp54p[Cytoplasm] + Srp51p[Cytoplasm] + Srp52p[Cytoplasm] + 2 GDP[Cytoplasm] + 2 pi[Cytoplasm]	translocation from cytosol to ER (SRP-dependent)
S000000610-SEC61C[Cytoplasm] + SPC[Endoplasmic Reticulum] => S000000610[Endoplasmic Reticulum] + Sec61p[Endoplasmic Reticulum] + Sbh1p[Endoplasmic Reticulum] + Sss1p[Endoplasmic Reticulum] + Sec11p[Endoplasmic Reticulum] + Spc1p[Endoplasmic Reticulum] + Spc2p[Endoplasmic Reticulum] + Spc3p[Endoplasmic Reticulum] + sp[Cytoplasm]	translocation from cytosol to ER (SRP-dependent)	Sec11p;Spc1p;Spc2p;Spc3p
S000000610-SEC61C[Endoplasmic Reticulum] + 5 Dol-pp-GlcNAc(2)man(9)-Glc(3)[Endoplasmic Reticulum] + OSTC[Endoplasmic Reticulum] => S000000610-G1-SEC61C[Endoplasmic Reticulum] + 5 Dol-ppEndoplasmic Reticulum] + Ost1p[Endoplasmic Reticulum] + Ost2p[Endoplasmic Reticulum] + St3p[Endoplasmic Reticulum] + Ost4p[Endoplasmic Reticulum] + Ost5p[Endoplasmic Reticulum] + Ost6p[Endoplasmic Reticulum] + Stt3…	ER N-glycosylation	Stt3p;Ost1p;Wbp1p;OSt3p;Ost6p;Swp1p;Ost2p;Ost5p;Ost4p
S000000610-G1-SEC61C[Endoplasmic Reticulum] => S000000610-G1[Endoplasmic Reticulum] + SEC61C[Endoplasmic Reticulum]	protein folding
S000000610-G1[Endoplasmic Reticulum] => S000000610-G2[Endoplasmic Reticulum] + Glc[Endoplasmic Reticulum]	protein folding	Cwh41p
S000000610-G2[Endoplasmic Reticulum] => S000000610-G3[Endoplasmic Reticulum] + Glc[Endoplasmic Reticulum]	protein folding	Rot2p
S000000610-G3[Endoplasmic Reticulum] => S000000610-G4[Endoplasmic Reticulum] + Glc[Endoplasmic Reticulum]	protein folding	Rot2p
S000000610-G4[Endoplasmic Reticulum] => S000000610-G5[Endoplasmic Reticulum] + man[Endoplasmic Reticulum]	protein folding	Mns1p
S000000610-G5[Endoplasmic Reticulum] + 5 Kar2p[Endoplasmic Reticulum] + 5 ATP[Endoplasmic Reticulum] + 5 Scj1p[Endoplasmic Reticulum] + 5 Jem1p[Endoplasmic Reticulum] + 5 Sec63p[Endoplasmic Reticulum] => S000000610-G5-Kar2ATPcplx[Endoplasmic Reticulum]	protein folding	Kar2p;Scj1p;Jem1p;Sec63p
S000000610-G5-Kar2ATPcplx-[Endoplasmic Reticulum] => S000000610-F-G5-Kar2ADPcplx[Endoplasmic Reticulum] + 5 Scj1p[Endoplasmic Reticulum] + 5 Jem1p[Endoplasmic Reticulum] + 5 pi[Endoplasmic Reticulum] + Sec63p[Endoplasmic Reticulum]	protein folding
S000000610-F-G5-Kar2ADPcplx[Endoplasmic Reticulum] + 5 Sil1p[Endoplasmic Reticulum] + 5 Lhs1p[Endoplasmic Reticulum] + 5 ATP[Endoplasmic Reticulum] => S000000610-F-G5[Endoplasmic Reticulum] + 5 Sil1p[Endoplasmic Reticulum] + 5 Lhs1p[Endoplasmic Reticulum] + 5 ADP[Endoplasmic Reticulum] + 5 Kar2p[Endoplasmic Reticulum] protein folding	protein folding	Lhs1p;Sil1p
S000000610-F-G5[Endoplasmic Reticulum] + Sar1-GTP[Endoplasmic Reticulum] + Sec23-Sec24C[Cytoplasm] + Bet1p[Endoplasmic Reticulum] + Bos1p[Endoplasmic Reticulum] => S000000610-F-G5-COPII-pbud-cplx[Endoplasmic Reticulum]	COPII (for transmembrane cargo)	Sar1p;Sec23p;Sec24p;Bet1p;Bos1p
S000000610-F-G7orG5-COPII-pbud-cplx[Endoplasmic Reticulum] + Sec13-Sec31C[Cytoplasm] + Sec16p[Endoplasmic Reticulum] + Sed4p[Endoplasmic Reticulum] + Sec17p[Endoplasmic Reticulum] => S000000610-F-G5orG7-COPII[COPII]	COPII(common	Sec13p;Sec31p;Sec16p;Sed4p;Sec17p;Sec22p
S000000610-F-G5-COPII[COPII] + TRAPPIC[COPII] + Ypt1p[COPII] + GTP[COPII] => S000000610-F-G5[Golgi] + sar1-GDP[Cytoplasm] + pi[Cytoplasm] + Sec13-Sec31C[Cytoplasm] + Sec16p[Cytoplasm] + Sec12-Sed24C[Cytoplasm] + Bet3p[Cytoplasm] + Bet5p[Cytoplasm] + Trs20p[Cytoplasm] + Trs23p[Cytoplasm] + Trs31p[Cytoplasm] + Trs33p[Cytoplasm] + Bet1p[Endoplasmic Reticulum] + Bos1p[Endoplasmic Reticulum]	COPII (for transmembrane cargo)	Ypt1p;Uso1p;bug1p;Bet3p;Bet5p;Trs20p;Trs23p;Trs31p;Trs33p
S000000610-misf-G8-cplx[Endoplasmic Reticulum] + 0.1 Hrd1p[Endoplasmic Reticulum] => S000000610-misf-G8-HRDcplx[Endoplasmic Reticulum]	ERADM	Hrd1p
S000000610-misf-G8-HRDcplx[Endoplasmic Reticulum] + 0.1 Ubc7p[Cytoplasm] + 0.1 Cue1p[Cytoplasm] + 0.1 AAAC[Cytoplasm] => S000000610-misf-G8-UBcplx[Endoplasmic Reticulum] + 0.1 Hrd1p[Endoplasmic Reticulum] + 0.1 Usa1p[Endoplasmic Reticulum] + 0.1 Der1p[Endoplasmic Reticulum]	ERADM	Ubc7p; Cue1p;Usa1p; Der1p
S000000610-misf-G8-UBcplx[Endoplasmic Reticulum] + 5 ATP[Cytoplasm] + 5 Ubiquitin[Cytoplasm] => S000000610-misf-G8-Ubiquitin[Cytoplasm] + Ubc7p[Cytoplasm] + 0.1 Cue1p[Cytoplasm] + 0.1 Ubx2p[Endoplasmic Reticulum] + 0.1 Cdc48p[Cytoplasm] + 0.1 Ufd1p[Cytoplasm] + 0.1 Npl4p[Cytoplasm] + 0.1 Usa1p[Endoplasmic Reticulum] + 0.1 Der1p[Endoplasmic Reticulum] + 5 AMP[Cytoplasm] + 5 ppi[Cytoplasm]	ERADM	Ubx2p; Cdc48p; Ufd1p;Npl4p;Ubiquitin
S000000610-misf-G8-Ubiquitin[Cytoplasm] + 0.1 Dsk2p[Cytoplasm] + 0.1 Rad23p[Cytoplasm] + 0.1 Png1p[Cytoplasm] + 5 ATP[Cytoplasm] + 0.1 26sproteosome[Cytoplasm] + 5 H2O[Cytoplasm] => G8[Cytoplasm] + 5 Ubiquitin[Cytoplasm] + 5 ADP[Cytoplasm] + 5 pi[Cytoplasm] + S000000610aa[Cytoplasm]	ERADM	Png1p;26sproteosome
S000000610-G5orG7[Golgi] + GDP-man[Golgi] => S000000610-G9[Golgi] + GDP[Golgi]	Golgi processing	Och1p
S000000610-G9[Golgi] + 5 GDP-man[Golgi] => S000000610-G10[Golgi] + 5 GDP[Golgi]	Golgi processing	Mnn9p;Van1p
S000000610-G10[Golgi] + 40 GDP-man[Golgi] => S000000610-G11[Golgi] + 40 GDP[Golgi]	Golgi processing	Anp1p;Mnn9p;Mnn10p;Mnn11p;Hoc1p
S000000610-G15[Golgi] => S000000610-G16[Golgi] + aminoacid[Golgi]	Golgi processing	Kex1p;Kex2p;Ste13p
S000000610-M1[Golgi] + GTP[Cytoplasm] + clathrinC[Cytoplasm] + Arf1p[Cytoplasm] + EXOC[Cytoplasm] => S000000610-M1[cell membrane] + GDP[Golgi] + 2 Chc1p[Cytoplasm] + Clc1p[Cytoplasm] + Arf1p[Cytoplasm] + Sec3p[Cytoplasm] + Sec5p[Cytoplasm] + Sec6p[Cytoplasm] + Sec8p[Cytoplasm] + Sec10p[Cytoplasm] + Sec15p[Cytoplasm] + Exo70p[Cytoplasm] + Exo84p[Cytoplasm] + Sec4p[Cytoplasm]	LDSV(low density Secretory vesicle)	Arf1p;Sec3p;Sec5p;Sec6p;Sec8p;Sec10p;Sec15p;Exo70p;Exo84p;Sec4p;Chc1p;Clc1p
S000000623[Cytoplasm] + SRPC[Cytoplasm] => S000000623-SRPC[Cytoplasm]	translocation from cytosol to ER (SRP-dependent)	Srp14p;Srp21p;Srp54p;Sec65p;Srp68p;Srp72p
S000000623-SRPC[Cytoplasm] + SRC[Endoplasmic Reticulum] => S000000623-SRPC-SRC[Cytoplasm]	translocation from cytosol to ER (SRP-dependent)	Srp101p;Srp102p
S000000623-SRPC-SRC[Cytoplasm] + 2 GTP[Cytoplasm] + SEC61C[Endoplasmic Reticulum] => S000000623-SRPC-SRC-SEC61C[Cytoplasm]	translocation from cytosol to ER (SRP-dependent)	Sec61p;Sbh1p;Sss1p;Ssh1p
S000000623-SRPC-SRC-SEC61C[Cytoplasm] => S000000623-SEC61C[Cytoplasm] + Srp14p[Cytoplasm] + Srp21p[Cytoplasm] + Srp68p[Cytoplasm] + Sec65p[Cytoplasm] + Srp72p[Cytoplasm] + scR1[Cytoplasm] + Srp54p[Cytoplasm] + Srp51p[Cytoplasm] + Srp52p[Cytoplasm] + 2 GDP[Cytoplasm] + 2 pi[Cytoplasm]	translocation from cytosol to ER (SRP-dependent)
S000000623-SEC61C[Cytoplasm] + SPC[Endoplasmic Reticulum] => S000000623[Endoplasmic Reticulum] + Sec61p[Endoplasmic Reticulum] + Sbh1p[Endoplasmic Reticulum] + Sss1p[Endoplasmic Reticulum] + Sec11p[Endoplasmic Reticulum] + Spc1p[Endoplasmic Reticulum] + Spc2p[Endoplasmic Reticulum] + Spc3p[Endoplasmic Reticulum] + sp[Cytoplasm]	translocation from cytosol to ER (SRP-dependent)	Sec11p;Spc1p;Spc2p;Spc3p
S000000623-G1-SEC61C[Endoplasmic Reticulum] => S000000623-G1[Endoplasmic Reticulum] + SEC61C[Endoplasmic Reticulum]	protein folding
S000000623-G5[Endoplasmic Reticulum] + 5 Kar2p[Endoplasmic Reticulum] + 5 ATP[Endoplasmic Reticulum] + 5 Scj1p[Endoplasmic Reticulum] + 5 Jem1p[Endoplasmic Reticulum] + 5 Sec63p[Endoplasmic Reticulum] => S000000623-G5-Kar2ATPcplx[Endoplasmic Reticulum]	protein folding	Kar2p;Scj1p;Jem1p;Sec63p
S000000623-G5-Kar2ATPcplx-[Endoplasmic Reticulum] => S000000623-F-G5-Kar2ADPcplx[Endoplasmic Reticulum] + 5 Scj1p[Endoplasmic Reticulum] + 5 Jem1p[Endoplasmic Reticulum] + 5 pi[Endoplasmic Reticulum] + Sec63p[Endoplasmic Reticulum]	protein folding
S000000623-F-G5-Kar2ADPcplx[Endoplasmic Reticulum] + 5 Sil1p[Endoplasmic Reticulum] + 5 Lhs1p[Endoplasmic Reticulum] + 5 ATP[Endoplasmic Reticulum] => S000000623-F-G5[Endoplasmic Reticulum] + 5 Sil1p[Endoplasmic Reticulum] + 5 Lhs1p[Endoplasmic Reticulum] + 5 ADP[Endoplasmic Reticulum] + 5 Kar2p[Endoplasmic Reticulum] protein folding	protein folding	Lhs1p;Sil1p
S000000623-F-G5[Endoplasmic Reticulum] + Sar1-GTP[Endoplasmic Reticulum] + Sec23-Sec24C[Cytoplasm] + Bet1p[Endoplasmic Reticulum] + Bos1p[Endoplasmic Reticulum] => S000000623-F-G5-COPII-pbud-cplx[Endoplasmic Reticulum]	COPII (for transmembrane cargo)	Sar1p;Sec23p;Sec24p;Bet1p;Bos1p
S000000623-F-G7orG5-COPII-pbud-cplx[Endoplasmic Reticulum] + Sec13-Sec31C[Cytoplasm] + Sec16p[Endoplasmic Reticulum] + Sed4p[Endoplasmic Reticulum] + Sec17p[Endoplasmic Reticulum] => S000000623-F-G5orG7-COPII[COPII]	COPII(common	Sec13p;Sec31p;Sec16p;Sed4p;Sec17p;Sec22p
S000000623-F-G5-COPII[COPII] + TRAPPIC[COPII] + Ypt1p[COPII] + GTP[COPII] => S000000623-F-G5[Golgi] + sar1-GDP[Cytoplasm] + pi[Cytoplasm] + Sec13-Sec31C[Cytoplasm] + Sec16p[Cytoplasm] + Sec12-Sed24C[Cytoplasm] + Bet3p[Cytoplasm] + Bet5p[Cytoplasm] + Trs20p[Cytoplasm] + Trs23p[Cytoplasm] + Trs31p[Cytoplasm] + Trs33p[Cytoplasm] + Bet1p[Endoplasmic Reticulum] + Bos1p[Endoplasmic Reticulum]	COPII (for transmembrane cargo)	Ypt1p;Uso1p;bug1p;Bet3p;Bet5p;Trs20p;Trs23p;Trs31p;Trs33p
S000000623-misf-G8-cplx[Endoplasmic Reticulum] + 0.1 Hrd1p[Endoplasmic Reticulum] => S000000623-misf-G8-HRDcplx[Endoplasmic Reticulum]	ERADM	Hrd1p
S000000623-misf-G8-HRDcplx[Endoplasmic Reticulum] + 0.1 Ubc7p[Cytoplasm] + 0.1 Cue1p[Cytoplasm] + 0.1 AAAC[Cytoplasm] => S000000623-misf-G8-UBcplx[Endoplasmic Reticulum] + 0.1 Hrd1p[Endoplasmic Reticulum] + 0.1 Usa1p[Endoplasmic Reticulum] + 0.1 Der1p[Endoplasmic Reticulum]	ERADM	Ubc7p; Cue1p;Usa1p; Der1p
S000000623-misf-G8-UBcplx[Endoplasmic Reticulum] + 5 ATP[Cytoplasm] + 5 Ubiquitin[Cytoplasm] => S000000623-misf-G8-Ubiquitin[Cytoplasm] + Ubc7p[Cytoplasm] + 0.1 Cue1p[Cytoplasm] + 0.1 Ubx2p[Endoplasmic Reticulum] + 0.1 Cdc48p[Cytoplasm] + 0.1 Ufd1p[Cytoplasm] + 0.1 Npl4p[Cytoplasm] + 0.1 Usa1p[Endoplasmic Reticulum] + 0.1 Der1p[Endoplasmic Reticulum] + 5 AMP[Cytoplasm] + 5 ppi[Cytoplasm]	ERADM	Ubx2p; Cdc48p; Ufd1p;Npl4p;Ubiquitin
S000000623-misf-G8-Ubiquitin[Cytoplasm] + 0.1 Dsk2p[Cytoplasm] + 0.1 Rad23p[Cytoplasm] + 0.1 Png1p[Cytoplasm] + 5 ATP[Cytoplasm] + 0.1 26sproteosome[Cytoplasm] + 5 H2O[Cytoplasm] => G8[Cytoplasm] + 5 Ubiquitin[Cytoplasm] + 5 ADP[Cytoplasm] + 5 pi[Cytoplasm] + S000000623aa[Cytoplasm]	ERADM	Png1p;26sproteosome
S000000623-G15[Golgi] => S000000623-G16[Golgi] + aminoacid[Golgi]	Golgi processing	Kex1p;Kex2p;Ste13p
S000000623-M1[Golgi] + GTP[Cytoplasm] + clathrinC[Cytoplasm] + Arf1p[Cytoplasm] + EXOC[Cytoplasm] => S000000623-M1[cell membrane] + GDP[Golgi] + 2 Chc1p[Cytoplasm] + Clc1p[Cytoplasm] + Arf1p[Cytoplasm] + Sec3p[Cytoplasm] + Sec5p[Cytoplasm] + Sec6p[Cytoplasm] + Sec8p[Cytoplasm] + Sec10p[Cytoplasm] + Sec15p[Cytoplasm] + Exo70p[Cytoplasm] + Exo84p[Cytoplasm] + Sec4p[Cytoplasm]	LDSV(low density Secretory vesicle)	Arf1p;Sec3p;Sec5p;Sec6p;Sec8p;Sec10p;Sec15p;Exo70p;Exo84p;Sec4p;Chc1p;Clc1p
S000002381[Cytoplasm] + SRPC[Cytoplasm] => S000002381-SRPC[Cytoplasm]	translocation from cytosol to ER (SRP-dependent)	Srp14p;Srp21p;Srp54p;Sec65p;Srp68p;Srp72p
S000002381-SRPC[Cytoplasm] + SRC[Endoplasmic Reticulum] => S000002381-SRPC-SRC[Cytoplasm]	translocation from cytosol to ER (SRP-dependent)	Srp101p;Srp102p
S000002381-SRPC-SRC[Cytoplasm] + 2 GTP[Cytoplasm] + SEC61C[Endoplasmic Reticulum] => S000002381-SRPC-SRC-SEC61C[Cytoplasm]	translocation from cytosol to ER (SRP-dependent)	Sec61p;Sbh1p;Sss1p;Ssh1p
S000002381-SRPC-SRC-SEC61C[Cytoplasm] => S000002381-SEC61C[Cytoplasm] + Srp14p[Cytoplasm] + Srp21p[Cytoplasm] + Srp68p[Cytoplasm] + Sec65p[Cytoplasm] + Srp72p[Cytoplasm] + scR1[Cytoplasm] + Srp54p[Cytoplasm] + Srp51p[Cytoplasm] + Srp52p[Cytoplasm] + 2 GDP[Cytoplasm] + 2 pi[Cytoplasm]	translocation from cytosol to ER (SRP-dependent)
S000002381-SEC61C[Cytoplasm] + SPC[Endoplasmic Reticulum] => S000002381[Endoplasmic Reticulum] + Sec61p[Endoplasmic Reticulum] + Sbh1p[Endoplasmic Reticulum] + Sss1p[Endoplasmic Reticulum] + Sec11p[Endoplasmic Reticulum] + Spc1p[Endoplasmic Reticulum] + Spc2p[Endoplasmic Reticulum] + Spc3p[Endoplasmic Reticulum] + sp[Cytoplasm]	translocation from cytosol to ER (SRP-dependent)	Sec11p;Spc1p;Spc2p;Spc3p
S000002381-SEC61C[Endoplasmic Reticulum] + 1 Dol-pp-GlcNAc(2)man(9)-Glc(3)[Endoplasmic Reticulum] + OSTC[Endoplasmic Reticulum] => S000002381-G1-SEC61C[Endoplasmic Reticulum] + 1 Dol-ppEndoplasmic Reticulum] + Ost1p[Endoplasmic Reticulum] + Ost2p[Endoplasmic Reticulum] + St3p[Endoplasmic Reticulum] + Ost4p[Endoplasmic Reticulum] + Ost5p[Endoplasmic Reticulum] + Ost6p[Endoplasmic Reticulum] + Stt3…	ER N-glycosylation	Stt3p;Ost1p;Wbp1p;OSt3p;Ost6p;Swp1p;Ost2p;Ost5p;Ost4p
S000002381-G1-SEC61C[Endoplasmic Reticulum] => S000002381-G1[Endoplasmic Reticulum] + SEC61C[Endoplasmic Reticulum]	protein folding
S000002381-G1[Endoplasmic Reticulum] => S000002381-G2[Endoplasmic Reticulum] + Glc[Endoplasmic Reticulum]	protein folding	Cwh41p
S000002381-G2[Endoplasmic Reticulum] => S000002381-G3[Endoplasmic Reticulum] + Glc[Endoplasmic Reticulum]	protein folding	Rot2p
S000002381-G3[Endoplasmic Reticulum] => S000002381-G4[Endoplasmic Reticulum] + Glc[Endoplasmic Reticulum]	protein folding	Rot2p
S000002381-G4[Endoplasmic Reticulum] => S000002381-G5[Endoplasmic Reticulum] + man[Endoplasmic Reticulum]	protein folding	Mns1p
S000002381-G5[Endoplasmic Reticulum] + 5 Kar2p[Endoplasmic Reticulum] + 5 ATP[Endoplasmic Reticulum] + 5 Scj1p[Endoplasmic Reticulum] + 5 Jem1p[Endoplasmic Reticulum] + 5 Sec63p[Endoplasmic Reticulum] => S000002381-G5-Kar2ATPcplx[Endoplasmic Reticulum]	protein folding	Kar2p;Scj1p;Jem1p;Sec63p
S000002381-G5-Kar2ATPcplx-[Endoplasmic Reticulum] => S000002381-F-G5-Kar2ADPcplx[Endoplasmic Reticulum] + 5 Scj1p[Endoplasmic Reticulum] + 5 Jem1p[Endoplasmic Reticulum] + 5 pi[Endoplasmic Reticulum] + Sec63p[Endoplasmic Reticulum]	protein folding
S000002381-F-G5-Kar2ADPcplx[Endoplasmic Reticulum] + 5 Sil1p[Endoplasmic Reticulum] + 5 Lhs1p[Endoplasmic Reticulum] + 5 ATP[Endoplasmic Reticulum] => S000002381-F-G5[Endoplasmic Reticulum] + 5 Sil1p[Endoplasmic Reticulum] + 5 Lhs1p[Endoplasmic Reticulum] + 5 ADP[Endoplasmic Reticulum] + 5 Kar2p[Endoplasmic Reticulum] protein folding	protein folding	Lhs1p;Sil1p
S000002381-F-G5[Endoplasmic Reticulum] + Sar1-GTP[Endoplasmic Reticulum] + Sec23-Sec24C[Cytoplasm] + Bet1p[Endoplasmic Reticulum] + Bos1p[Endoplasmic Reticulum] => S000002381-F-G5-COPII-pbud-cplx[Endoplasmic Reticulum]	COPII (for transmembrane cargo)	Sar1p;Sec23p;Sec24p;Bet1p;Bos1p
S000002381-F-G7orG5-COPII-pbud-cplx[Endoplasmic Reticulum] + Sec13-Sec31C[Cytoplasm] + Sec16p[Endoplasmic Reticulum] + Sed4p[Endoplasmic Reticulum] + Sec17p[Endoplasmic Reticulum] => S000002381-F-G5orG7-COPII[COPII]	COPII(common	Sec13p;Sec31p;Sec16p;Sed4p;Sec17p;Sec22p
S000002381-F-G5-COPII[COPII] + TRAPPIC[COPII] + Ypt1p[COPII] + GTP[COPII] => S000002381-F-G5[Golgi] + sar1-GDP[Cytoplasm] + pi[Cytoplasm] + Sec13-Sec31C[Cytoplasm] + Sec16p[Cytoplasm] + Sec12-Sed24C[Cytoplasm] + Bet3p[Cytoplasm] + Bet5p[Cytoplasm] + Trs20p[Cytoplasm] + Trs23p[Cytoplasm] + Trs31p[Cytoplasm] + Trs33p[Cytoplasm] + Bet1p[Endoplasmic Reticulum] + Bos1p[Endoplasmic Reticulum]	COPII (for transmembrane cargo)	Ypt1p;Uso1p;bug1p;Bet3p;Bet5p;Trs20p;Trs23p;Trs31p;Trs33p
S000002381-misf-G8-cplx[Endoplasmic Reticulum] + 0.1 Hrd1p[Endoplasmic Reticulum] => S000002381-misf-G8-HRDcplx[Endoplasmic Reticulum]	ERADM	Hrd1p
S000002381-misf-G8-HRDcplx[Endoplasmic Reticulum] + 0.1 Ubc7p[Cytoplasm] + 0.1 Cue1p[Cytoplasm] + 0.1 AAAC[Cytoplasm] => S000002381-misf-G8-UBcplx[Endoplasmic Reticulum] + 0.1 Hrd1p[Endoplasmic Reticulum] + 0.1 Usa1p[Endoplasmic Reticulum] + 0.1 Der1p[Endoplasmic Reticulum]	ERADM	Ubc7p; Cue1p;Usa1p; Der1p
S000002381-misf-G8-UBcplx[Endoplasmic Reticulum] + 5 ATP[Cytoplasm] + 5 Ubiquitin[Cytoplasm] => S000002381-misf-G8-Ubiquitin[Cytoplasm] + Ubc7p[Cytoplasm] + 0.1 Cue1p[Cytoplasm] + 0.1 Ubx2p[Endoplasmic Reticulum] + 0.1 Cdc48p[Cytoplasm] + 0.1 Ufd1p[Cytoplasm] + 0.1 Npl4p[Cytoplasm] + 0.1 Usa1p[Endoplasmic Reticulum] + 0.1 Der1p[Endoplasmic Reticulum] + 5 AMP[Cytoplasm] + 5 ppi[Cytoplasm]	ERADM	Ubx2p; Cdc48p; Ufd1p;Npl4p;Ubiquitin
S000002381-misf-G8-Ubiquitin[Cytoplasm] + 0.1 Dsk2p[Cytoplasm] + 0.1 Rad23p[Cytoplasm] + 0.1 Png1p[Cytoplasm] + 5 ATP[Cytoplasm] + 0.1 26sproteosome[Cytoplasm] + 5 H2O[Cytoplasm] => G8[Cytoplasm] + 5 Ubiquitin[Cytoplasm] + 5 ADP[Cytoplasm] + 5 pi[Cytoplasm] + S000002381aa[Cytoplasm]	ERADM	Png1p;26sproteosome
S000002381-G5orG7[Golgi] + GDP-man[Golgi] => S000002381-G9[Golgi] + GDP[Golgi]	Golgi processing	Och1p
S000002381-G9[Golgi] + 5 GDP-man[Golgi] => S000002381-G10[Golgi] + 5 GDP[Golgi]	Golgi processing	Mnn9p;Van1p
S000002381-G10[Golgi] + 40 GDP-man[Golgi] => S000002381-G11[Golgi] + 40 GDP[Golgi]	Golgi processing	Anp1p;Mnn9p;Mnn10p;Mnn11p;Hoc1p
S000002381-G15[Golgi] => S000002381-G16[Golgi] + aminoacid[Golgi]	Golgi processing	Kex1p;Kex2p;Ste13p
S000002381-M1[Golgi] + GTP[Cytoplasm] + clathrinC[Cytoplasm] + Arf1p[Cytoplasm] + EXOC[Cytoplasm] => S000002381-M1[cell membrane] + GDP[Golgi] + 2 Chc1p[Cytoplasm] + Clc1p[Cytoplasm] + Arf1p[Cytoplasm] + Sec3p[Cytoplasm] + Sec5p[Cytoplasm] + Sec6p[Cytoplasm] + Sec8p[Cytoplasm] + Sec10p[Cytoplasm] + Sec15p[Cytoplasm] + Exo70p[Cytoplasm] + Exo84p[Cytoplasm] + Sec4p[Cytoplasm]	LDSV(low density Secretory vesicle)	Arf1p;Sec3p;Sec5p;Sec6p;Sec8p;Sec10p;Sec15p;Exo70p;Exo84p;Sec4p;Chc1p;Clc1p
S000002440[Cytoplasm] + SRPC[Cytoplasm] => S000002440-SRPC[Cytoplasm]	translocation from cytosol to ER (SRP-dependent)	Srp14p;Srp21p;Srp54p;Sec65p;Srp68p;Srp72p
S000002440-SRPC[Cytoplasm] + SRC[Endoplasmic Reticulum] => S000002440-SRPC-SRC[Cytoplasm]	translocation from cytosol to ER (SRP-dependent)	Srp101p;Srp102p
S000002440-SRPC-SRC[Cytoplasm] + 2 GTP[Cytoplasm] + SEC61C[Endoplasmic Reticulum] => S000002440-SRPC-SRC-SEC61C[Cytoplasm]	translocation from cytosol to ER (SRP-dependent)	Sec61p;Sbh1p;Sss1p;Ssh1p
S000002440-SRPC-SRC-SEC61C[Cytoplasm] => S000002440-SEC61C[Cytoplasm] + Srp14p[Cytoplasm] + Srp21p[Cytoplasm] + Srp68p[Cytoplasm] + Sec65p[Cytoplasm] + Srp72p[Cytoplasm] + scR1[Cytoplasm] + Srp54p[Cytoplasm] + Srp51p[Cytoplasm] + Srp52p[Cytoplasm] + 2 GDP[Cytoplasm] + 2 pi[Cytoplasm]	translocation from cytosol to ER (SRP-dependent)
S000002440-SEC61C[Cytoplasm] + SPC[Endoplasmic Reticulum] => S000002440[Endoplasmic Reticulum] + Sec61p[Endoplasmic Reticulum] + Sbh1p[Endoplasmic Reticulum] + Sss1p[Endoplasmic Reticulum] + Sec11p[Endoplasmic Reticulum] + Spc1p[Endoplasmic Reticulum] + Spc2p[Endoplasmic Reticulum] + Spc3p[Endoplasmic Reticulum] + sp[Cytoplasm]	translocation from cytosol to ER (SRP-dependent)	Sec11p;Spc1p;Spc2p;Spc3p
S000002440-G1-SEC61C[Endoplasmic Reticulum] => S000002440-G1[Endoplasmic Reticulum] + SEC61C[Endoplasmic Reticulum]	protein folding
S000002440-G5[Endoplasmic Reticulum] + 5 Kar2p[Endoplasmic Reticulum] + 5 ATP[Endoplasmic Reticulum] + 5 Scj1p[Endoplasmic Reticulum] + 5 Jem1p[Endoplasmic Reticulum] + 5 Sec63p[Endoplasmic Reticulum] => S000002440-G5-Kar2ATPcplx[Endoplasmic Reticulum]	protein folding	Kar2p;Scj1p;Jem1p;Sec63p
S000002440-G5-Kar2ATPcplx-[Endoplasmic Reticulum] => S000002440-F-G5-Kar2ADPcplx[Endoplasmic Reticulum] + 5 Scj1p[Endoplasmic Reticulum] + 5 Jem1p[Endoplasmic Reticulum] + 5 pi[Endoplasmic Reticulum] + Sec63p[Endoplasmic Reticulum]	protein folding
S000002440-F-G5-Kar2ADPcplx[Endoplasmic Reticulum] + 5 Sil1p[Endoplasmic Reticulum] + 5 Lhs1p[Endoplasmic Reticulum] + 5 ATP[Endoplasmic Reticulum] => S000002440-F-G5[Endoplasmic Reticulum] + 5 Sil1p[Endoplasmic Reticulum] + 5 Lhs1p[Endoplasmic Reticulum] + 5 ADP[Endoplasmic Reticulum] + 5 Kar2p[Endoplasmic Reticulum] protein folding	protein folding	Lhs1p;Sil1p
S000002440-F-G5[Endoplasmic Reticulum] + Sar1-GTP[Endoplasmic Reticulum] + Sec23-Sec24C[Cytoplasm] + Bet1p[Endoplasmic Reticulum] + Bos1p[Endoplasmic Reticulum] => S000002440-F-G5-COPII-pbud-cplx[Endoplasmic Reticulum]	COPII (for transmembrane cargo)	Sar1p;Sec23p;Sec24p;Bet1p;Bos1p
S000002440-F-G7orG5-COPII-pbud-cplx[Endoplasmic Reticulum] + Sec13-Sec31C[Cytoplasm] + Sec16p[Endoplasmic Reticulum] + Sed4p[Endoplasmic Reticulum] + Sec17p[Endoplasmic Reticulum] => S000002440-F-G5orG7-COPII[COPII]	COPII(common	Sec13p;Sec31p;Sec16p;Sed4p;Sec17p;Sec22p
S000002440-F-G5-COPII[COPII] + TRAPPIC[COPII] + Ypt1p[COPII] + GTP[COPII] => S000002440-F-G5[Golgi] + sar1-GDP[Cytoplasm] + pi[Cytoplasm] + Sec13-Sec31C[Cytoplasm] + Sec16p[Cytoplasm] + Sec12-Sed24C[Cytoplasm] + Bet3p[Cytoplasm] + Bet5p[Cytoplasm] + Trs20p[Cytoplasm] + Trs23p[Cytoplasm] + Trs31p[Cytoplasm] + Trs33p[Cytoplasm] + Bet1p[Endoplasmic Reticulum] + Bos1p[Endoplasmic Reticulum]	COPII (for transmembrane cargo)	Ypt1p;Uso1p;bug1p;Bet3p;Bet5p;Trs20p;Trs23p;Trs31p;Trs33p
S000002440-misf-G8-cplx[Endoplasmic Reticulum] + 0.1 Hrd1p[Endoplasmic Reticulum] => S000002440-misf-G8-HRDcplx[Endoplasmic Reticulum]	ERADM	Hrd1p
S000002440-misf-G8-HRDcplx[Endoplasmic Reticulum] + 0.1 Ubc7p[Cytoplasm] + 0.1 Cue1p[Cytoplasm] + 0.1 AAAC[Cytoplasm] => S000002440-misf-G8-UBcplx[Endoplasmic Reticulum] + 0.1 Hrd1p[Endoplasmic Reticulum] + 0.1 Usa1p[Endoplasmic Reticulum] + 0.1 Der1p[Endoplasmic Reticulum]	ERADM	Ubc7p; Cue1p;Usa1p; Der1p
S000002440-misf-G8-UBcplx[Endoplasmic Reticulum] + 5 ATP[Cytoplasm] + 5 Ubiquitin[Cytoplasm] => S000002440-misf-G8-Ubiquitin[Cytoplasm] + Ubc7p[Cytoplasm] + 0.1 Cue1p[Cytoplasm] + 0.1 Ubx2p[Endoplasmic Reticulum] + 0.1 Cdc48p[Cytoplasm] + 0.1 Ufd1p[Cytoplasm] + 0.1 Npl4p[Cytoplasm] + 0.1 Usa1p[Endoplasmic Reticulum] + 0.1 Der1p[Endoplasmic Reticulum] + 5 AMP[Cytoplasm] + 5 ppi[Cytoplasm]	ERADM	Ubx2p; Cdc48p; Ufd1p;Npl4p;Ubiquitin
S000002440-misf-G8-Ubiquitin[Cytoplasm] + 0.1 Dsk2p[Cytoplasm] + 0.1 Rad23p[Cytoplasm] + 0.1 Png1p[Cytoplasm] + 5 ATP[Cytoplasm] + 0.1 26sproteosome[Cytoplasm] + 5 H2O[Cytoplasm] => G8[Cytoplasm] + 5 Ubiquitin[Cytoplasm] + 5 ADP[Cytoplasm] + 5 pi[Cytoplasm] + S000002440aa[Cytoplasm]	ERADM	Png1p;26sproteosome
S000002440-G15[Golgi] => S000002440-G16[Golgi] + aminoacid[Golgi]	Golgi processing	Kex1p;Kex2p;Ste13p
S000002440-M1[Golgi] + GTP[Cytoplasm] + clathrinC[Cytoplasm] + Arf1p[Cytoplasm] + EXOC[Cytoplasm] => S000002440-M1[cell membrane] + GDP[Golgi] + 2 Chc1p[Cytoplasm] + Clc1p[Cytoplasm] + Arf1p[Cytoplasm] + Sec3p[Cytoplasm] + Sec5p[Cytoplasm] + Sec6p[Cytoplasm] + Sec8p[Cytoplasm] + Sec10p[Cytoplasm] + Sec15p[Cytoplasm] + Exo70p[Cytoplasm] + Exo84p[Cytoplasm] + Sec4p[Cytoplasm]	LDSV(low density Secretory vesicle)	Arf1p;Sec3p;Sec5p;Sec6p;Sec8p;Sec10p;Sec15p;Exo70p;Exo84p;Sec4p;Chc1p;Clc1p
S000006353[Cytoplasm] + SRPC[Cytoplasm] => S000006353-SRPC[Cytoplasm]	translocation from cytosol to ER (SRP-dependent)	Srp14p;Srp21p;Srp54p;Sec65p;Srp68p;Srp72p
S000006353-SRPC[Cytoplasm] + SRC[Endoplasmic Reticulum] => S000006353-SRPC-SRC[Cytoplasm]	translocation from cytosol to ER (SRP-dependent)	Srp101p;Srp102p
S000006353-SRPC-SRC[Cytoplasm] + 2 GTP[Cytoplasm] + SEC61C[Endoplasmic Reticulum] => S000006353-SRPC-SRC-SEC61C[Cytoplasm]	translocation from cytosol to ER (SRP-dependent)	Sec61p;Sbh1p;Sss1p;Ssh1p
S000006353-SRPC-SRC-SEC61C[Cytoplasm] => S000006353-SEC61C[Cytoplasm] + Srp14p[Cytoplasm] + Srp21p[Cytoplasm] + Srp68p[Cytoplasm] + Sec65p[Cytoplasm] + Srp72p[Cytoplasm] + scR1[Cytoplasm] + Srp54p[Cytoplasm] + Srp51p[Cytoplasm] + Srp52p[Cytoplasm] + 2 GDP[Cytoplasm] + 2 pi[Cytoplasm]	translocation from cytosol to ER (SRP-dependent)
S000006353-SEC61C[Cytoplasm] + SPC[Endoplasmic Reticulum] => S000006353[Endoplasmic Reticulum] + Sec61p[Endoplasmic Reticulum] + Sbh1p[Endoplasmic Reticulum] + Sss1p[Endoplasmic Reticulum] + Sec11p[Endoplasmic Reticulum] + Spc1p[Endoplasmic Reticulum] + Spc2p[Endoplasmic Reticulum] + Spc3p[Endoplasmic Reticulum] + sp[Cytoplasm]	translocation from cytosol to ER (SRP-dependent)	Sec11p;Spc1p;Spc2p;Spc3p
S000006353-G1-SEC61C[Endoplasmic Reticulum] => S000006353-G1[Endoplasmic Reticulum] + SEC61C[Endoplasmic Reticulum]	protein folding
S000006353-G5[Endoplasmic Reticulum] + 5 Kar2p[Endoplasmic Reticulum] + 5 ATP[Endoplasmic Reticulum] + 5 Scj1p[Endoplasmic Reticulum] + 5 Jem1p[Endoplasmic Reticulum] + 5 Sec63p[Endoplasmic Reticulum] => S000006353-G5-Kar2ATPcplx[Endoplasmic Reticulum]	protein folding	Kar2p;Scj1p;Jem1p;Sec63p
S000006353-G5-Kar2ATPcplx-[Endoplasmic Reticulum] => S000006353-F-G5-Kar2ADPcplx[Endoplasmic Reticulum] + 5 Scj1p[Endoplasmic Reticulum] + 5 Jem1p[Endoplasmic Reticulum] + 5 pi[Endoplasmic Reticulum] + Sec63p[Endoplasmic Reticulum]	protein folding
S000006353-F-G5-Kar2ADPcplx[Endoplasmic Reticulum] + 5 Sil1p[Endoplasmic Reticulum] + 5 Lhs1p[Endoplasmic Reticulum] + 5 ATP[Endoplasmic Reticulum] => S000006353-F-G5[Endoplasmic Reticulum] + 5 Sil1p[Endoplasmic Reticulum] + 5 Lhs1p[Endoplasmic Reticulum] + 5 ADP[Endoplasmic Reticulum] + 5 Kar2p[Endoplasmic Reticulum] protein folding	protein folding	Lhs1p;Sil1p
S000006353-F-G5[Endoplasmic Reticulum] + Sar1-GTP[Endoplasmic Reticulum] + Sec23-Sec24C[Cytoplasm] + Bet1p[Endoplasmic Reticulum] + Bos1p[Endoplasmic Reticulum] => S000006353-F-G5-COPII-pbud-cplx[Endoplasmic Reticulum]	COPII (for transmembrane cargo)	Sar1p;Sec23p;Sec24p;Bet1p;Bos1p
S000006353-F-G7orG5-COPII-pbud-cplx[Endoplasmic Reticulum] + Sec13-Sec31C[Cytoplasm] + Sec16p[Endoplasmic Reticulum] + Sed4p[Endoplasmic Reticulum] + Sec17p[Endoplasmic Reticulum] => S000006353-F-G5orG7-COPII[COPII]	COPII(common	Sec13p;Sec31p;Sec16p;Sed4p;Sec17p;Sec22p
S000006353-F-G5-COPII[COPII] + TRAPPIC[COPII] + Ypt1p[COPII] + GTP[COPII] => S000006353-F-G5[Golgi] + sar1-GDP[Cytoplasm] + pi[Cytoplasm] + Sec13-Sec31C[Cytoplasm] + Sec16p[Cytoplasm] + Sec12-Sed24C[Cytoplasm] + Bet3p[Cytoplasm] + Bet5p[Cytoplasm] + Trs20p[Cytoplasm] + Trs23p[Cytoplasm] + Trs31p[Cytoplasm] + Trs33p[Cytoplasm] + Bet1p[Endoplasmic Reticulum] + Bos1p[Endoplasmic Reticulum]	COPII (for transmembrane cargo)	Ypt1p;Uso1p;bug1p;Bet3p;Bet5p;Trs20p;Trs23p;Trs31p;Trs33p
S000006353-misf-G8-cplx[Endoplasmic Reticulum] + 0.1 Hrd1p[Endoplasmic Reticulum] => S000006353-misf-G8-HRDcplx[Endoplasmic Reticulum]	ERADM	Hrd1p
S000006353-misf-G8-HRDcplx[Endoplasmic Reticulum] + 0.1 Ubc7p[Cytoplasm] + 0.1 Cue1p[Cytoplasm] + 0.1 AAAC[Cytoplasm] => S000006353-misf-G8-UBcplx[Endoplasmic Reticulum] + 0.1 Hrd1p[Endoplasmic Reticulum] + 0.1 Usa1p[Endoplasmic Reticulum] + 0.1 Der1p[Endoplasmic Reticulum]	ERADM	Ubc7p; Cue1p;Usa1p; Der1p
S000006353-misf-G8-UBcplx[Endoplasmic Reticulum] + 5 ATP[Cytoplasm] + 5 Ubiquitin[Cytoplasm] => S000006353-misf-G8-Ubiquitin[Cytoplasm] + Ubc7p[Cytoplasm] + 0.1 Cue1p[Cytoplasm] + 0.1 Ubx2p[Endoplasmic Reticulum] + 0.1 Cdc48p[Cytoplasm] + 0.1 Ufd1p[Cytoplasm] + 0.1 Npl4p[Cytoplasm] + 0.1 Usa1p[Endoplasmic Reticulum] + 0.1 Der1p[Endoplasmic Reticulum] + 5 AMP[Cytoplasm] + 5 ppi[Cytoplasm]	ERADM	Ubx2p; Cdc48p; Ufd1p;Npl4p;Ubiquitin
S000006353-misf-G8-Ubiquitin[Cytoplasm] + 0.1 Dsk2p[Cytoplasm] + 0.1 Rad23p[Cytoplasm] + 0.1 Png1p[Cytoplasm] + 5 ATP[Cytoplasm] + 0.1 26sproteosome[Cytoplasm] + 5 H2O[Cytoplasm] => G8[Cytoplasm] + 5 Ubiquitin[Cytoplasm] + 5 ADP[Cytoplasm] + 5 pi[Cytoplasm] + S000006353aa[Cytoplasm]	ERADM	Png1p;26sproteosome
S000006353-G15[Golgi] => S000006353-G16[Golgi] + aminoacid[Golgi]	Golgi processing	Kex1p;Kex2p;Ste13p
S000006353-M1[Golgi] + GTP[Cytoplasm] + clathrinC[Cytoplasm] + Arf1p[Cytoplasm] + EXOC[Cytoplasm] => S000006353-M1[cell membrane] + GDP[Golgi] + 2 Chc1p[Cytoplasm] + Clc1p[Cytoplasm] + Arf1p[Cytoplasm] + Sec3p[Cytoplasm] + Sec5p[Cytoplasm] + Sec6p[Cytoplasm] + Sec8p[Cytoplasm] + Sec10p[Cytoplasm] + Sec15p[Cytoplasm] + Exo70p[Cytoplasm] + Exo84p[Cytoplasm] + Sec4p[Cytoplasm]	LDSV(low density Secretory vesicle)	Arf1p;Sec3p;Sec5p;Sec6p;Sec8p;Sec10p;Sec15p;Exo70p;Exo84p;Sec4p;Chc1p;Clc1p
S000004594[Cytoplasm] + SRPC[Cytoplasm] => S000004594-SRPC[Cytoplasm]	translocation from cytosol to ER (SRP-dependent)	Srp14p;Srp21p;Srp54p;Sec65p;Srp68p;Srp72p
S000004594-SRPC[Cytoplasm] + SRC[Endoplasmic Reticulum] => S000004594-SRPC-SRC[Cytoplasm]	translocation from cytosol to ER (SRP-dependent)	Srp101p;Srp102p
S000004594-SRPC-SRC[Cytoplasm] + 2 GTP[Cytoplasm] + SEC61C[Endoplasmic Reticulum] => S000004594-SRPC-SRC-SEC61C[Cytoplasm]	translocation from cytosol to ER (SRP-dependent)	Sec61p;Sbh1p;Sss1p;Ssh1p
S000004594-SRPC-SRC-SEC61C[Cytoplasm] => S000004594-SEC61C[Cytoplasm] + Srp14p[Cytoplasm] + Srp21p[Cytoplasm] + Srp68p[Cytoplasm] + Sec65p[Cytoplasm] + Srp72p[Cytoplasm] + scR1[Cytoplasm] + Srp54p[Cytoplasm] + Srp51p[Cytoplasm] + Srp52p[Cytoplasm] + 2 GDP[Cytoplasm] + 2 pi[Cytoplasm]	translocation from cytosol to ER (SRP-dependent)
S000004594-SEC61C[Cytoplasm] + SPC[Endoplasmic Reticulum] => S000004594[Endoplasmic Reticulum] + Sec61p[Endoplasmic Reticulum] + Sbh1p[Endoplasmic Reticulum] + Sss1p[Endoplasmic Reticulum] + Sec11p[Endoplasmic Reticulum] + Spc1p[Endoplasmic Reticulum] + Spc2p[Endoplasmic Reticulum] + Spc3p[Endoplasmic Reticulum] + sp[Cytoplasm]	translocation from cytosol to ER (SRP-dependent)	Sec11p;Spc1p;Spc2p;Spc3p
S000004594-G1-SEC61C[Endoplasmic Reticulum] => S000004594-G1[Endoplasmic Reticulum] + SEC61C[Endoplasmic Reticulum]	protein folding
S000004594-G5[Endoplasmic Reticulum] + 5 Kar2p[Endoplasmic Reticulum] + 5 ATP[Endoplasmic Reticulum] + 5 Scj1p[Endoplasmic Reticulum] + 5 Jem1p[Endoplasmic Reticulum] + 5 Sec63p[Endoplasmic Reticulum] => S000004594-G5-Kar2ATPcplx[Endoplasmic Reticulum]	protein folding	Kar2p;Scj1p;Jem1p;Sec63p
S000004594-G5-Kar2ATPcplx-[Endoplasmic Reticulum] => S000004594-F-G5-Kar2ADPcplx[Endoplasmic Reticulum] + 5 Scj1p[Endoplasmic Reticulum] + 5 Jem1p[Endoplasmic Reticulum] + 5 pi[Endoplasmic Reticulum] + Sec63p[Endoplasmic Reticulum]	protein folding
S000004594-F-G5-Kar2ADPcplx[Endoplasmic Reticulum] + 5 Sil1p[Endoplasmic Reticulum] + 5 Lhs1p[Endoplasmic Reticulum] + 5 ATP[Endoplasmic Reticulum] => S000004594-F-G5[Endoplasmic Reticulum] + 5 Sil1p[Endoplasmic Reticulum] + 5 Lhs1p[Endoplasmic Reticulum] + 5 ADP[Endoplasmic Reticulum] + 5 Kar2p[Endoplasmic Reticulum] protein folding	protein folding	Lhs1p;Sil1p
S000004594-F-G5[Endoplasmic Reticulum] + Sar1-GTP[Endoplasmic Reticulum] + Sec23-Sec24C[Cytoplasm] + Bet1p[Endoplasmic Reticulum] + Bos1p[Endoplasmic Reticulum] => S000004594-F-G5-COPII-pbud-cplx[Endoplasmic Reticulum]	COPII (for transmembrane cargo)	Sar1p;Sec23p;Sec24p;Bet1p;Bos1p
S000004594-F-G7orG5-COPII-pbud-cplx[Endoplasmic Reticulum] + Sec13-Sec31C[Cytoplasm] + Sec16p[Endoplasmic Reticulum] + Sed4p[Endoplasmic Reticulum] + Sec17p[Endoplasmic Reticulum] => S000004594-F-G5orG7-COPII[COPII]	COPII(common	Sec13p;Sec31p;Sec16p;Sed4p;Sec17p;Sec22p
S000004594-F-G5-COPII[COPII] + TRAPPIC[COPII] + Ypt1p[COPII] + GTP[COPII] => S000004594-F-G5[Golgi] + sar1-GDP[Cytoplasm] + pi[Cytoplasm] + Sec13-Sec31C[Cytoplasm] + Sec16p[Cytoplasm] + Sec12-Sed24C[Cytoplasm] + Bet3p[Cytoplasm] + Bet5p[Cytoplasm] + Trs20p[Cytoplasm] + Trs23p[Cytoplasm] + Trs31p[Cytoplasm] + Trs33p[Cytoplasm] + Bet1p[Endoplasmic Reticulum] + Bos1p[Endoplasmic Reticulum]	COPII (for transmembrane cargo)	Ypt1p;Uso1p;bug1p;Bet3p;Bet5p;Trs20p;Trs23p;Trs31p;Trs33p
S000004594-misf-G8-cplx[Endoplasmic Reticulum] + 0.1 Hrd1p[Endoplasmic Reticulum] => S000004594-misf-G8-HRDcplx[Endoplasmic Reticulum]	ERADM	Hrd1p
S000004594-misf-G8-HRDcplx[Endoplasmic Reticulum] + 0.1 Ubc7p[Cytoplasm] + 0.1 Cue1p[Cytoplasm] + 0.1 AAAC[Cytoplasm] => S000004594-misf-G8-UBcplx[Endoplasmic Reticulum] + 0.1 Hrd1p[Endoplasmic Reticulum] + 0.1 Usa1p[Endoplasmic Reticulum] + 0.1 Der1p[Endoplasmic Reticulum]	ERADM	Ubc7p; Cue1p;Usa1p; Der1p
S000004594-misf-G8-UBcplx[Endoplasmic Reticulum] + 5 ATP[Cytoplasm] + 5 Ubiquitin[Cytoplasm] => S000004594-misf-G8-Ubiquitin[Cytoplasm] + Ubc7p[Cytoplasm] + 0.1 Cue1p[Cytoplasm] + 0.1 Ubx2p[Endoplasmic Reticulum] + 0.1 Cdc48p[Cytoplasm] + 0.1 Ufd1p[Cytoplasm] + 0.1 Npl4p[Cytoplasm] + 0.1 Usa1p[Endoplasmic Reticulum] + 0.1 Der1p[Endoplasmic Reticulum] + 5 AMP[Cytoplasm] + 5 ppi[Cytoplasm]	ERADM	Ubx2p; Cdc48p; Ufd1p;Npl4p;Ubiquitin
S000004594-misf-G8-Ubiquitin[Cytoplasm] + 0.1 Dsk2p[Cytoplasm] + 0.1 Rad23p[Cytoplasm] + 0.1 Png1p[Cytoplasm] + 5 ATP[Cytoplasm] + 0.1 26sproteosome[Cytoplasm] + 5 H2O[Cytoplasm] => G8[Cytoplasm] + 5 Ubiquitin[Cytoplasm] + 5 ADP[Cytoplasm] + 5 pi[Cytoplasm] + S000004594aa[Cytoplasm]	ERADM	Png1p;26sproteosome
S000004594-G15[Golgi] => S000004594-G16[Golgi] + aminoacid[Golgi]	Golgi processing	Kex1p;Kex2p;Ste13p
S000004594-M1[Golgi] + GTP[Cytoplasm] + clathrinC[Cytoplasm] + Arf1p[Cytoplasm] + EXOC[Cytoplasm] => S000004594-M1[cell membrane] + GDP[Golgi] + 2 Chc1p[Cytoplasm] + Clc1p[Cytoplasm] + Arf1p[Cytoplasm] + Sec3p[Cytoplasm] + Sec5p[Cytoplasm] + Sec6p[Cytoplasm] + Sec8p[Cytoplasm] + Sec10p[Cytoplasm] + Sec15p[Cytoplasm] + Exo70p[Cytoplasm] + Exo84p[Cytoplasm] + Sec4p[Cytoplasm]	LDSV(low density Secretory vesicle)	Arf1p;Sec3p;Sec5p;Sec6p;Sec8p;Sec10p;Sec15p;Exo70p;Exo84p;Sec4p;Chc1p;Clc1p
S000005444[Cytoplasm] + SRPC[Cytoplasm] => S000005444-SRPC[Cytoplasm]	translocation from cytosol to ER (SRP-dependent)	Srp14p;Srp21p;Srp54p;Sec65p;Srp68p;Srp72p
S000005444-SRPC[Cytoplasm] + SRC[Endoplasmic Reticulum] => S000005444-SRPC-SRC[Cytoplasm]	translocation from cytosol to ER (SRP-dependent)	Srp101p;Srp102p
S000005444-SRPC-SRC[Cytoplasm] + 2 GTP[Cytoplasm] + SEC61C[Endoplasmic Reticulum] => S000005444-SRPC-SRC-SEC61C[Cytoplasm]	translocation from cytosol to ER (SRP-dependent)	Sec61p;Sbh1p;Sss1p;Ssh1p
S000005444-SRPC-SRC-SEC61C[Cytoplasm] => S000005444-SEC61C[Cytoplasm] + Srp14p[Cytoplasm] + Srp21p[Cytoplasm] + Srp68p[Cytoplasm] + Sec65p[Cytoplasm] + Srp72p[Cytoplasm] + scR1[Cytoplasm] + Srp54p[Cytoplasm] + Srp51p[Cytoplasm] + Srp52p[Cytoplasm] + 2 GDP[Cytoplasm] + 2 pi[Cytoplasm]	translocation from cytosol to ER (SRP-dependent)
S000005444-SEC61C[Cytoplasm] + SPC[Endoplasmic Reticulum] => S000005444[Endoplasmic Reticulum] + Sec61p[Endoplasmic Reticulum] + Sbh1p[Endoplasmic Reticulum] + Sss1p[Endoplasmic Reticulum] + Sec11p[Endoplasmic Reticulum] + Spc1p[Endoplasmic Reticulum] + Spc2p[Endoplasmic Reticulum] + Spc3p[Endoplasmic Reticulum] + sp[Cytoplasm]	translocation from cytosol to ER (SRP-dependent)	Sec11p;Spc1p;Spc2p;Spc3p
S000005444-SEC61C[Endoplasmic Reticulum] + 2 Dol-pp-GlcNAc(2)man(9)-Glc(3)[Endoplasmic Reticulum] + OSTC[Endoplasmic Reticulum] => S000005444-G1-SEC61C[Endoplasmic Reticulum] + 2 Dol-ppEndoplasmic Reticulum] + Ost1p[Endoplasmic Reticulum] + Ost2p[Endoplasmic Reticulum] + St3p[Endoplasmic Reticulum] + Ost4p[Endoplasmic Reticulum] + Ost5p[Endoplasmic Reticulum] + Ost6p[Endoplasmic Reticulum] + Stt3…	ER N-glycosylation	Stt3p;Ost1p;Wbp1p;OSt3p;Ost6p;Swp1p;Ost2p;Ost5p;Ost4p
S000005444-G1-SEC61C[Endoplasmic Reticulum] => S000005444-G1[Endoplasmic Reticulum] + SEC61C[Endoplasmic Reticulum]	protein folding
S000005444-G1[Endoplasmic Reticulum] => S000005444-G2[Endoplasmic Reticulum] + Glc[Endoplasmic Reticulum]	protein folding	Cwh41p
S000005444-G2[Endoplasmic Reticulum] => S000005444-G3[Endoplasmic Reticulum] + Glc[Endoplasmic Reticulum]	protein folding	Rot2p
S000005444-G3[Endoplasmic Reticulum] => S000005444-G4[Endoplasmic Reticulum] + Glc[Endoplasmic Reticulum]	protein folding	Rot2p
S000005444-G4[Endoplasmic Reticulum] => S000005444-G5[Endoplasmic Reticulum] + man[Endoplasmic Reticulum]	protein folding	Mns1p
S000005444-G5[Endoplasmic Reticulum] + 5 Kar2p[Endoplasmic Reticulum] + 5 ATP[Endoplasmic Reticulum] + 5 Scj1p[Endoplasmic Reticulum] + 5 Jem1p[Endoplasmic Reticulum] + 5 Sec63p[Endoplasmic Reticulum] => S000005444-G5-Kar2ATPcplx[Endoplasmic Reticulum]	protein folding	Kar2p;Scj1p;Jem1p;Sec63p
S000005444-G5-Kar2ATPcplx-[Endoplasmic Reticulum] => S000005444-F-G5-Kar2ADPcplx[Endoplasmic Reticulum] + 5 Scj1p[Endoplasmic Reticulum] + 5 Jem1p[Endoplasmic Reticulum] + 5 pi[Endoplasmic Reticulum] + Sec63p[Endoplasmic Reticulum]	protein folding
S000005444-F-G5-Kar2ADPcplx[Endoplasmic Reticulum] + 5 Sil1p[Endoplasmic Reticulum] + 5 Lhs1p[Endoplasmic Reticulum] + 5 ATP[Endoplasmic Reticulum] => S000005444-F-G5[Endoplasmic Reticulum] + 5 Sil1p[Endoplasmic Reticulum] + 5 Lhs1p[Endoplasmic Reticulum] + 5 ADP[Endoplasmic Reticulum] + 5 Kar2p[Endoplasmic Reticulum] protein folding	protein folding	Lhs1p;Sil1p
S000005444-F-G5[Endoplasmic Reticulum] + Sar1-GTP[Endoplasmic Reticulum] + Sec23-Sec24C[Cytoplasm] + Bet1p[Endoplasmic Reticulum] + Bos1p[Endoplasmic Reticulum] => S000005444-F-G5-COPII-pbud-cplx[Endoplasmic Reticulum]	COPII (for transmembrane cargo)	Sar1p;Sec23p;Sec24p;Bet1p;Bos1p
S000005444-F-G7orG5-COPII-pbud-cplx[Endoplasmic Reticulum] + Sec13-Sec31C[Cytoplasm] + Sec16p[Endoplasmic Reticulum] + Sed4p[Endoplasmic Reticulum] + Sec17p[Endoplasmic Reticulum] => S000005444-F-G5orG7-COPII[COPII]	COPII(common	Sec13p;Sec31p;Sec16p;Sed4p;Sec17p;Sec22p
S000005444-F-G5-COPII[COPII] + TRAPPIC[COPII] + Ypt1p[COPII] + GTP[COPII] => S000005444-F-G5[Golgi] + sar1-GDP[Cytoplasm] + pi[Cytoplasm] + Sec13-Sec31C[Cytoplasm] + Sec16p[Cytoplasm] + Sec12-Sed24C[Cytoplasm] + Bet3p[Cytoplasm] + Bet5p[Cytoplasm] + Trs20p[Cytoplasm] + Trs23p[Cytoplasm] + Trs31p[Cytoplasm] + Trs33p[Cytoplasm] + Bet1p[Endoplasmic Reticulum] + Bos1p[Endoplasmic Reticulum]	COPII (for transmembrane cargo)	Ypt1p;Uso1p;bug1p;Bet3p;Bet5p;Trs20p;Trs23p;Trs31p;Trs33p
S000005444-misf-G8-cplx[Endoplasmic Reticulum] + 0.1 Hrd1p[Endoplasmic Reticulum] => S000005444-misf-G8-HRDcplx[Endoplasmic Reticulum]	ERADM	Hrd1p
S000005444-misf-G8-HRDcplx[Endoplasmic Reticulum] + 0.1 Ubc7p[Cytoplasm] + 0.1 Cue1p[Cytoplasm] + 0.1 AAAC[Cytoplasm] => S000005444-misf-G8-UBcplx[Endoplasmic Reticulum] + 0.1 Hrd1p[Endoplasmic Reticulum] + 0.1 Usa1p[Endoplasmic Reticulum] + 0.1 Der1p[Endoplasmic Reticulum]	ERADM	Ubc7p; Cue1p;Usa1p; Der1p
S000005444-misf-G8-UBcplx[Endoplasmic Reticulum] + 5 ATP[Cytoplasm] + 5 Ubiquitin[Cytoplasm] => S000005444-misf-G8-Ubiquitin[Cytoplasm] + Ubc7p[Cytoplasm] + 0.1 Cue1p[Cytoplasm] + 0.1 Ubx2p[Endoplasmic Reticulum] + 0.1 Cdc48p[Cytoplasm] + 0.1 Ufd1p[Cytoplasm] + 0.1 Npl4p[Cytoplasm] + 0.1 Usa1p[Endoplasmic Reticulum] + 0.1 Der1p[Endoplasmic Reticulum] + 5 AMP[Cytoplasm] + 5 ppi[Cytoplasm]	ERADM	Ubx2p; Cdc48p; Ufd1p;Npl4p;Ubiquitin
S000005444-misf-G8-Ubiquitin[Cytoplasm] + 0.1 Dsk2p[Cytoplasm] + 0.1 Rad23p[Cytoplasm] + 0.1 Png1p[Cytoplasm] + 5 ATP[Cytoplasm] + 0.1 26sproteosome[Cytoplasm] + 5 H2O[Cytoplasm] => G8[Cytoplasm] + 5 Ubiquitin[Cytoplasm] + 5 ADP[Cytoplasm] + 5 pi[Cytoplasm] + S000005444aa[Cytoplasm]	ERADM	Png1p;26sproteosome
S000005444-G5orG7[Golgi] + GDP-man[Golgi] => S000005444-G9[Golgi] + GDP[Golgi]	Golgi processing	Och1p
S000005444-G9[Golgi] + 5 GDP-man[Golgi] => S000005444-G10[Golgi] + 5 GDP[Golgi]	Golgi processing	Mnn9p;Van1p
S000005444-G10[Golgi] + 40 GDP-man[Golgi] => S000005444-G11[Golgi] + 40 GDP[Golgi]	Golgi processing	Anp1p;Mnn9p;Mnn10p;Mnn11p;Hoc1p
S000005444-G15[Golgi] => S000005444-G16[Golgi] + aminoacid[Golgi]	Golgi processing	Kex1p;Kex2p;Ste13p
S000005444-M1[Golgi] + GTP[Cytoplasm] + clathrinC[Cytoplasm] + Arf1p[Cytoplasm] + EXOC[Cytoplasm] => S000005444-M1[cell membrane] + GDP[Golgi] + 2 Chc1p[Cytoplasm] + Clc1p[Cytoplasm] + Arf1p[Cytoplasm] + Sec3p[Cytoplasm] + Sec5p[Cytoplasm] + Sec6p[Cytoplasm] + Sec8p[Cytoplasm] + Sec10p[Cytoplasm] + Sec15p[Cytoplasm] + Exo70p[Cytoplasm] + Exo84p[Cytoplasm] + Sec4p[Cytoplasm]	LDSV(low density Secretory vesicle)	Arf1p;Sec3p;Sec5p;Sec6p;Sec8p;Sec10p;Sec15p;Exo70p;Exo84p;Sec4p;Chc1p;Clc1p
S000005223[Cytoplasm] + SRPC[Cytoplasm] => S000005223-SRPC[Cytoplasm]	translocation from cytosol to ER (SRP-dependent)	Srp14p;Srp21p;Srp54p;Sec65p;Srp68p;Srp72p
S000005223-SRPC[Cytoplasm] + SRC[Endoplasmic Reticulum] => S000005223-SRPC-SRC[Cytoplasm]	translocation from cytosol to ER (SRP-dependent)	Srp101p;Srp102p
S000005223-SRPC-SRC[Cytoplasm] + 2 GTP[Cytoplasm] + SEC61C[Endoplasmic Reticulum] => S000005223-SRPC-SRC-SEC61C[Cytoplasm]	translocation from cytosol to ER (SRP-dependent)	Sec61p;Sbh1p;Sss1p;Ssh1p
S000005223-SRPC-SRC-SEC61C[Cytoplasm] => S000005223-SEC61C[Cytoplasm] + Srp14p[Cytoplasm] + Srp21p[Cytoplasm] + Srp68p[Cytoplasm] + Sec65p[Cytoplasm] + Srp72p[Cytoplasm] + scR1[Cytoplasm] + Srp54p[Cytoplasm] + Srp51p[Cytoplasm] + Srp52p[Cytoplasm] + 2 GDP[Cytoplasm] + 2 pi[Cytoplasm]	translocation from cytosol to ER (SRP-dependent)
S000005223-SEC61C[Cytoplasm] + SPC[Endoplasmic Reticulum] => S000005223[Endoplasmic Reticulum] + Sec61p[Endoplasmic Reticulum] + Sbh1p[Endoplasmic Reticulum] + Sss1p[Endoplasmic Reticulum] + Sec11p[Endoplasmic Reticulum] + Spc1p[Endoplasmic Reticulum] + Spc2p[Endoplasmic Reticulum] + Spc3p[Endoplasmic Reticulum] + sp[Cytoplasm]	translocation from cytosol to ER (SRP-dependent)	Sec11p;Spc1p;Spc2p;Spc3p
S000005223-SEC61C[Endoplasmic Reticulum] + 14 Dol-pp-GlcNAc(2)man(9)-Glc(3)[Endoplasmic Reticulum] + OSTC[Endoplasmic Reticulum] => S000005223-G1-SEC61C[Endoplasmic Reticulum] + 14 Dol-ppEndoplasmic Reticulum] + Ost1p[Endoplasmic Reticulum] + Ost2p[Endoplasmic Reticulum] + St3p[Endoplasmic Reticulum] + Ost4p[Endoplasmic Reticulum] + Ost5p[Endoplasmic Reticulum] + Ost6p[Endoplasmic Reticulum] + St…	ER N-glycosylation	Stt3p;Ost1p;Wbp1p;OSt3p;Ost6p;Swp1p;Ost2p;Ost5p;Ost4p
S000005223-G1-SEC61C[Endoplasmic Reticulum] => S000005223-G1[Endoplasmic Reticulum] + SEC61C[Endoplasmic Reticulum]	protein folding
S000005223-G1[Endoplasmic Reticulum] => S000005223-G2[Endoplasmic Reticulum] + Glc[Endoplasmic Reticulum]	protein folding	Cwh41p
S000005223-G2[Endoplasmic Reticulum] => S000005223-G3[Endoplasmic Reticulum] + Glc[Endoplasmic Reticulum]	protein folding	Rot2p
S000005223-G3[Endoplasmic Reticulum] => S000005223-G4[Endoplasmic Reticulum] + Glc[Endoplasmic Reticulum]	protein folding	Rot2p
S000005223-G4[Endoplasmic Reticulum] => S000005223-G5[Endoplasmic Reticulum] + man[Endoplasmic Reticulum]	protein folding	Mns1p
S000005223-G5[Endoplasmic Reticulum] + 5 Kar2p[Endoplasmic Reticulum] + 5 ATP[Endoplasmic Reticulum] + 5 Scj1p[Endoplasmic Reticulum] + 5 Jem1p[Endoplasmic Reticulum] + 5 Sec63p[Endoplasmic Reticulum] => S000005223-G5-Kar2ATPcplx[Endoplasmic Reticulum]	protein folding	Kar2p;Scj1p;Jem1p;Sec63p
S000005223-G5-Kar2ATPcplx-[Endoplasmic Reticulum] => S000005223-F-G5-Kar2ADPcplx[Endoplasmic Reticulum] + 5 Scj1p[Endoplasmic Reticulum] + 5 Jem1p[Endoplasmic Reticulum] + 5 pi[Endoplasmic Reticulum] + Sec63p[Endoplasmic Reticulum]	protein folding
S000005223-F-G5-Kar2ADPcplx[Endoplasmic Reticulum] + 5 Sil1p[Endoplasmic Reticulum] + 5 Lhs1p[Endoplasmic Reticulum] + 5 ATP[Endoplasmic Reticulum] => S000005223-F-G5[Endoplasmic Reticulum] + 5 Sil1p[Endoplasmic Reticulum] + 5 Lhs1p[Endoplasmic Reticulum] + 5 ADP[Endoplasmic Reticulum] + 5 Kar2p[Endoplasmic Reticulum] protein folding	protein folding	Lhs1p;Sil1p
S000005223-F-G5[Endoplasmic Reticulum] + Sar1-GTP[Endoplasmic Reticulum] + Sec23-Sec24C[Cytoplasm] + Bet1p[Endoplasmic Reticulum] + Bos1p[Endoplasmic Reticulum] => S000005223-F-G5-COPII-pbud-cplx[Endoplasmic Reticulum]	COPII (for transmembrane cargo)	Sar1p;Sec23p;Sec24p;Bet1p;Bos1p
S000005223-F-G7orG5-COPII-pbud-cplx[Endoplasmic Reticulum] + Sec13-Sec31C[Cytoplasm] + Sec16p[Endoplasmic Reticulum] + Sed4p[Endoplasmic Reticulum] + Sec17p[Endoplasmic Reticulum] => S000005223-F-G5orG7-COPII[COPII]	COPII(common	Sec13p;Sec31p;Sec16p;Sed4p;Sec17p;Sec22p
S000005223-F-G5-COPII[COPII] + TRAPPIC[COPII] + Ypt1p[COPII] + GTP[COPII] => S000005223-F-G5[Golgi] + sar1-GDP[Cytoplasm] + pi[Cytoplasm] + Sec13-Sec31C[Cytoplasm] + Sec16p[Cytoplasm] + Sec12-Sed24C[Cytoplasm] + Bet3p[Cytoplasm] + Bet5p[Cytoplasm] + Trs20p[Cytoplasm] + Trs23p[Cytoplasm] + Trs31p[Cytoplasm] + Trs33p[Cytoplasm] + Bet1p[Endoplasmic Reticulum] + Bos1p[Endoplasmic Reticulum]	COPII (for transmembrane cargo)	Ypt1p;Uso1p;bug1p;Bet3p;Bet5p;Trs20p;Trs23p;Trs31p;Trs33p
S000005223-misf-G8-cplx[Endoplasmic Reticulum] + 0.1 Hrd1p[Endoplasmic Reticulum] => S000005223-misf-G8-HRDcplx[Endoplasmic Reticulum]	ERADM	Hrd1p
S000005223-misf-G8-HRDcplx[Endoplasmic Reticulum] + 0.1 Ubc7p[Cytoplasm] + 0.1 Cue1p[Cytoplasm] + 0.1 AAAC[Cytoplasm] => S000005223-misf-G8-UBcplx[Endoplasmic Reticulum] + 0.1 Hrd1p[Endoplasmic Reticulum] + 0.1 Usa1p[Endoplasmic Reticulum] + 0.1 Der1p[Endoplasmic Reticulum]	ERADM	Ubc7p; Cue1p;Usa1p; Der1p
S000005223-misf-G8-UBcplx[Endoplasmic Reticulum] + 5 ATP[Cytoplasm] + 5 Ubiquitin[Cytoplasm] => S000005223-misf-G8-Ubiquitin[Cytoplasm] + Ubc7p[Cytoplasm] + 0.1 Cue1p[Cytoplasm] + 0.1 Ubx2p[Endoplasmic Reticulum] + 0.1 Cdc48p[Cytoplasm] + 0.1 Ufd1p[Cytoplasm] + 0.1 Npl4p[Cytoplasm] + 0.1 Usa1p[Endoplasmic Reticulum] + 0.1 Der1p[Endoplasmic Reticulum] + 5 AMP[Cytoplasm] + 5 ppi[Cytoplasm]	ERADM	Ubx2p; Cdc48p; Ufd1p;Npl4p;Ubiquitin
S000005223-misf-G8-Ubiquitin[Cytoplasm] + 0.1 Dsk2p[Cytoplasm] + 0.1 Rad23p[Cytoplasm] + 0.1 Png1p[Cytoplasm] + 5 ATP[Cytoplasm] + 0.1 26sproteosome[Cytoplasm] + 5 H2O[Cytoplasm] => G8[Cytoplasm] + 5 Ubiquitin[Cytoplasm] + 5 ADP[Cytoplasm] + 5 pi[Cytoplasm] + S000005223aa[Cytoplasm]	ERADM	Png1p;26sproteosome
S000005223-G5orG7[Golgi] + GDP-man[Golgi] => S000005223-G9[Golgi] + GDP[Golgi]	Golgi processing	Och1p
S000005223-G9[Golgi] + 5 GDP-man[Golgi] => S000005223-G10[Golgi] + 5 GDP[Golgi]	Golgi processing	Mnn9p;Van1p
S000005223-G10[Golgi] + 40 GDP-man[Golgi] => S000005223-G11[Golgi] + 40 GDP[Golgi]	Golgi processing	Anp1p;Mnn9p;Mnn10p;Mnn11p;Hoc1p
S000005223-G15[Golgi] => S000005223-G16[Golgi] + aminoacid[Golgi]	Golgi processing	Kex1p;Kex2p;Ste13p
S000005223-M1[Golgi] + GTP[Cytoplasm] + clathrinC[Cytoplasm] + Arf1p[Cytoplasm] + EXOC[Cytoplasm] => S000005223-M1[cell membrane] + GDP[Golgi] + 2 Chc1p[Cytoplasm] + Clc1p[Cytoplasm] + Arf1p[Cytoplasm] + Sec3p[Cytoplasm] + Sec5p[Cytoplasm] + Sec6p[Cytoplasm] + Sec8p[Cytoplasm] + Sec10p[Cytoplasm] + Sec15p[Cytoplasm] + Exo70p[Cytoplasm] + Exo84p[Cytoplasm] + Sec4p[Cytoplasm]	LDSV(low density Secretory vesicle)	Arf1p;Sec3p;Sec5p;Sec6p;Sec8p;Sec10p;Sec15p;Exo70p;Exo84p;Sec4p;Chc1p;Clc1p
S000004406[Cytoplasm] + SRPC[Cytoplasm] => S000004406-SRPC[Cytoplasm]	translocation from cytosol to ER (SRP-dependent)	Srp14p;Srp21p;Srp54p;Sec65p;Srp68p;Srp72p
S000004406-SRPC[Cytoplasm] + SRC[Endoplasmic Reticulum] => S000004406-SRPC-SRC[Cytoplasm]	translocation from cytosol to ER (SRP-dependent)	Srp101p;Srp102p
S000004406-SRPC-SRC[Cytoplasm] + 2 GTP[Cytoplasm] + SEC61C[Endoplasmic Reticulum] => S000004406-SRPC-SRC-SEC61C[Cytoplasm]	translocation from cytosol to ER (SRP-dependent)	Sec61p;Sbh1p;Sss1p;Ssh1p
S000004406-SRPC-SRC-SEC61C[Cytoplasm] => S000004406-SEC61C[Cytoplasm] + Srp14p[Cytoplasm] + Srp21p[Cytoplasm] + Srp68p[Cytoplasm] + Sec65p[Cytoplasm] + Srp72p[Cytoplasm] + scR1[Cytoplasm] + Srp54p[Cytoplasm] + Srp51p[Cytoplasm] + Srp52p[Cytoplasm] + 2 GDP[Cytoplasm] + 2 pi[Cytoplasm]	translocation from cytosol to ER (SRP-dependent)
S000004406-SEC61C[Cytoplasm] + SPC[Endoplasmic Reticulum] => S000004406[Endoplasmic Reticulum] + Sec61p[Endoplasmic Reticulum] + Sbh1p[Endoplasmic Reticulum] + Sss1p[Endoplasmic Reticulum] + Sec11p[Endoplasmic Reticulum] + Spc1p[Endoplasmic Reticulum] + Spc2p[Endoplasmic Reticulum] + Spc3p[Endoplasmic Reticulum] + sp[Cytoplasm]	translocation from cytosol to ER (SRP-dependent)	Sec11p;Spc1p;Spc2p;Spc3p
S000004406-SEC61C[Endoplasmic Reticulum] + 2 Dol-pp-GlcNAc(2)man(9)-Glc(3)[Endoplasmic Reticulum] + OSTC[Endoplasmic Reticulum] => S000004406-G1-SEC61C[Endoplasmic Reticulum] + 2 Dol-ppEndoplasmic Reticulum] + Ost1p[Endoplasmic Reticulum] + Ost2p[Endoplasmic Reticulum] + St3p[Endoplasmic Reticulum] + Ost4p[Endoplasmic Reticulum] + Ost5p[Endoplasmic Reticulum] + Ost6p[Endoplasmic Reticulum] + Stt3…	ER N-glycosylation	Stt3p;Ost1p;Wbp1p;OSt3p;Ost6p;Swp1p;Ost2p;Ost5p;Ost4p
S000004406-G1-SEC61C[Endoplasmic Reticulum] => S000004406-G1[Endoplasmic Reticulum] + SEC61C[Endoplasmic Reticulum]	protein folding
S000004406-G1[Endoplasmic Reticulum] => S000004406-G2[Endoplasmic Reticulum] + Glc[Endoplasmic Reticulum]	protein folding	Cwh41p
S000004406-G2[Endoplasmic Reticulum] => S000004406-G3[Endoplasmic Reticulum] + Glc[Endoplasmic Reticulum]	protein folding	Rot2p
S000004406-G3[Endoplasmic Reticulum] => S000004406-G4[Endoplasmic Reticulum] + Glc[Endoplasmic Reticulum]	protein folding	Rot2p
S000004406-G4[Endoplasmic Reticulum] => S000004406-G5[Endoplasmic Reticulum] + man[Endoplasmic Reticulum]	protein folding	Mns1p
S000004406-G5[Endoplasmic Reticulum] + 5 Kar2p[Endoplasmic Reticulum] + 5 ATP[Endoplasmic Reticulum] + 5 Scj1p[Endoplasmic Reticulum] + 5 Jem1p[Endoplasmic Reticulum] + 5 Sec63p[Endoplasmic Reticulum] => S000004406-G5-Kar2ATPcplx[Endoplasmic Reticulum]	protein folding	Kar2p;Scj1p;Jem1p;Sec63p
S000004406-G5-Kar2ATPcplx-[Endoplasmic Reticulum] => S000004406-F-G5-Kar2ADPcplx[Endoplasmic Reticulum] + 5 Scj1p[Endoplasmic Reticulum] + 5 Jem1p[Endoplasmic Reticulum] + 5 pi[Endoplasmic Reticulum] + Sec63p[Endoplasmic Reticulum]	protein folding
S000004406-F-G5-Kar2ADPcplx[Endoplasmic Reticulum] + 5 Sil1p[Endoplasmic Reticulum] + 5 Lhs1p[Endoplasmic Reticulum] + 5 ATP[Endoplasmic Reticulum] => S000004406-F-G5[Endoplasmic Reticulum] + 5 Sil1p[Endoplasmic Reticulum] + 5 Lhs1p[Endoplasmic Reticulum] + 5 ADP[Endoplasmic Reticulum] + 5 Kar2p[Endoplasmic Reticulum] protein folding	protein folding	Lhs1p;Sil1p
S000004406-F-G5[Endoplasmic Reticulum] + Sar1-GTP[Endoplasmic Reticulum] + Sec23-Sec24C[Cytoplasm] + Bet1p[Endoplasmic Reticulum] + Bos1p[Endoplasmic Reticulum] => S000004406-F-G5-COPII-pbud-cplx[Endoplasmic Reticulum]	COPII (for transmembrane cargo)	Sar1p;Sec23p;Sec24p;Bet1p;Bos1p
S000004406-F-G7orG5-COPII-pbud-cplx[Endoplasmic Reticulum] + Sec13-Sec31C[Cytoplasm] + Sec16p[Endoplasmic Reticulum] + Sed4p[Endoplasmic Reticulum] + Sec17p[Endoplasmic Reticulum] => S000004406-F-G5orG7-COPII[COPII]	COPII(common	Sec13p;Sec31p;Sec16p;Sed4p;Sec17p;Sec22p
S000004406-F-G5-COPII[COPII] + TRAPPIC[COPII] + Ypt1p[COPII] + GTP[COPII] => S000004406-F-G5[Golgi] + sar1-GDP[Cytoplasm] + pi[Cytoplasm] + Sec13-Sec31C[Cytoplasm] + Sec16p[Cytoplasm] + Sec12-Sed24C[Cytoplasm] + Bet3p[Cytoplasm] + Bet5p[Cytoplasm] + Trs20p[Cytoplasm] + Trs23p[Cytoplasm] + Trs31p[Cytoplasm] + Trs33p[Cytoplasm] + Bet1p[Endoplasmic Reticulum] + Bos1p[Endoplasmic Reticulum]	COPII (for transmembrane cargo)	Ypt1p;Uso1p;bug1p;Bet3p;Bet5p;Trs20p;Trs23p;Trs31p;Trs33p
S000004406-misf-G8-cplx[Endoplasmic Reticulum] + 0.1 Hrd1p[Endoplasmic Reticulum] => S000004406-misf-G8-HRDcplx[Endoplasmic Reticulum]	ERADM	Hrd1p
S000004406-misf-G8-HRDcplx[Endoplasmic Reticulum] + 0.1 Ubc7p[Cytoplasm] + 0.1 Cue1p[Cytoplasm] + 0.1 AAAC[Cytoplasm] => S000004406-misf-G8-UBcplx[Endoplasmic Reticulum] + 0.1 Hrd1p[Endoplasmic Reticulum] + 0.1 Usa1p[Endoplasmic Reticulum] + 0.1 Der1p[Endoplasmic Reticulum]	ERADM	Ubc7p; Cue1p;Usa1p; Der1p
S000004406-misf-G8-UBcplx[Endoplasmic Reticulum] + 5 ATP[Cytoplasm] + 5 Ubiquitin[Cytoplasm] => S000004406-misf-G8-Ubiquitin[Cytoplasm] + Ubc7p[Cytoplasm] + 0.1 Cue1p[Cytoplasm] + 0.1 Ubx2p[Endoplasmic Reticulum] + 0.1 Cdc48p[Cytoplasm] + 0.1 Ufd1p[Cytoplasm] + 0.1 Npl4p[Cytoplasm] + 0.1 Usa1p[Endoplasmic Reticulum] + 0.1 Der1p[Endoplasmic Reticulum] + 5 AMP[Cytoplasm] + 5 ppi[Cytoplasm]	ERADM	Ubx2p; Cdc48p; Ufd1p;Npl4p;Ubiquitin
S000004406-misf-G8-Ubiquitin[Cytoplasm] + 0.1 Dsk2p[Cytoplasm] + 0.1 Rad23p[Cytoplasm] + 0.1 Png1p[Cytoplasm] + 5 ATP[Cytoplasm] + 0.1 26sproteosome[Cytoplasm] + 5 H2O[Cytoplasm] => G8[Cytoplasm] + 5 Ubiquitin[Cytoplasm] + 5 ADP[Cytoplasm] + 5 pi[Cytoplasm] + S000004406aa[Cytoplasm]	ERADM	Png1p;26sproteosome
S000004406-G5orG7[Golgi] + GDP-man[Golgi] => S000004406-G9[Golgi] + GDP[Golgi]	Golgi processing	Och1p
S000004406-G9[Golgi] + 5 GDP-man[Golgi] => S000004406-G10[Golgi] + 5 GDP[Golgi]	Golgi processing	Mnn9p;Van1p
S000004406-G10[Golgi] + 40 GDP-man[Golgi] => S000004406-G11[Golgi] + 40 GDP[Golgi]	Golgi processing	Anp1p;Mnn9p;Mnn10p;Mnn11p;Hoc1p
S000004406-G15[Golgi] => S000004406-G16[Golgi] + aminoacid[Golgi]	Golgi processing	Kex1p;Kex2p;Ste13p
S000004406-M1[Golgi] + GTP[Cytoplasm] + clathrinC[Cytoplasm] + Arf1p[Cytoplasm] + EXOC[Cytoplasm] => S000004406-M1[cell membrane] + GDP[Golgi] + 2 Chc1p[Cytoplasm] + Clc1p[Cytoplasm] + Arf1p[Cytoplasm] + Sec3p[Cytoplasm] + Sec5p[Cytoplasm] + Sec6p[Cytoplasm] + Sec8p[Cytoplasm] + Sec10p[Cytoplasm] + Sec15p[Cytoplasm] + Exo70p[Cytoplasm] + Exo84p[Cytoplasm] + Sec4p[Cytoplasm]	LDSV(low density Secretory vesicle)	Arf1p;Sec3p;Sec5p;Sec6p;Sec8p;Sec10p;Sec15p;Exo70p;Exo84p;Sec4p;Chc1p;Clc1p
S000005575[Cytoplasm] + SRPC[Cytoplasm] => S000005575-SRPC[Cytoplasm]	translocation from cytosol to ER (SRP-dependent)	Srp14p;Srp21p;Srp54p;Sec65p;Srp68p;Srp72p
S000005575-SRPC[Cytoplasm] + SRC[Endoplasmic Reticulum] => S000005575-SRPC-SRC[Cytoplasm]	translocation from cytosol to ER (SRP-dependent)	Srp101p;Srp102p
S000005575-SRPC-SRC[Cytoplasm] + 2 GTP[Cytoplasm] + SEC61C[Endoplasmic Reticulum] => S000005575-SRPC-SRC-SEC61C[Cytoplasm]	translocation from cytosol to ER (SRP-dependent)	Sec61p;Sbh1p;Sss1p;Ssh1p
S000005575-SRPC-SRC-SEC61C[Cytoplasm] => S000005575-SEC61C[Cytoplasm] + Srp14p[Cytoplasm] + Srp21p[Cytoplasm] + Srp68p[Cytoplasm] + Sec65p[Cytoplasm] + Srp72p[Cytoplasm] + scR1[Cytoplasm] + Srp54p[Cytoplasm] + Srp51p[Cytoplasm] + Srp52p[Cytoplasm] + 2 GDP[Cytoplasm] + 2 pi[Cytoplasm]	translocation from cytosol to ER (SRP-dependent)
S000005575-SEC61C[Cytoplasm] + SPC[Endoplasmic Reticulum] => S000005575[Endoplasmic Reticulum] + Sec61p[Endoplasmic Reticulum] + Sbh1p[Endoplasmic Reticulum] + Sss1p[Endoplasmic Reticulum] + Sec11p[Endoplasmic Reticulum] + Spc1p[Endoplasmic Reticulum] + Spc2p[Endoplasmic Reticulum] + Spc3p[Endoplasmic Reticulum] + sp[Cytoplasm]	translocation from cytosol to ER (SRP-dependent)	Sec11p;Spc1p;Spc2p;Spc3p
S000005575-SEC61C[Endoplasmic Reticulum] + 2 Dol-pp-GlcNAc(2)man(9)-Glc(3)[Endoplasmic Reticulum] + OSTC[Endoplasmic Reticulum] => S000005575-G1-SEC61C[Endoplasmic Reticulum] + 2 Dol-ppEndoplasmic Reticulum] + Ost1p[Endoplasmic Reticulum] + Ost2p[Endoplasmic Reticulum] + St3p[Endoplasmic Reticulum] + Ost4p[Endoplasmic Reticulum] + Ost5p[Endoplasmic Reticulum] + Ost6p[Endoplasmic Reticulum] + Stt3…	ER N-glycosylation	Stt3p;Ost1p;Wbp1p;OSt3p;Ost6p;Swp1p;Ost2p;Ost5p;Ost4p
S000005575-G1-SEC61C[Endoplasmic Reticulum] => S000005575-G1[Endoplasmic Reticulum] + SEC61C[Endoplasmic Reticulum]	protein folding
S000005575-G1[Endoplasmic Reticulum] => S000005575-G2[Endoplasmic Reticulum] + Glc[Endoplasmic Reticulum]	protein folding	Cwh41p
S000005575-G2[Endoplasmic Reticulum] => S000005575-G3[Endoplasmic Reticulum] + Glc[Endoplasmic Reticulum]	protein folding	Rot2p
S000005575-G3[Endoplasmic Reticulum] => S000005575-G4[Endoplasmic Reticulum] + Glc[Endoplasmic Reticulum]	protein folding	Rot2p
S000005575-G4[Endoplasmic Reticulum] => S000005575-G5[Endoplasmic Reticulum] + man[Endoplasmic Reticulum]	protein folding	Mns1p
S000005575-G5[Endoplasmic Reticulum] + 5 Kar2p[Endoplasmic Reticulum] + 5 ATP[Endoplasmic Reticulum] + 5 Scj1p[Endoplasmic Reticulum] + 5 Jem1p[Endoplasmic Reticulum] + 5 Sec63p[Endoplasmic Reticulum] => S000005575-G5-Kar2ATPcplx[Endoplasmic Reticulum]	protein folding	Kar2p;Scj1p;Jem1p;Sec63p
S000005575-G5-Kar2ATPcplx-[Endoplasmic Reticulum] => S000005575-F-G5-Kar2ADPcplx[Endoplasmic Reticulum] + 5 Scj1p[Endoplasmic Reticulum] + 5 Jem1p[Endoplasmic Reticulum] + 5 pi[Endoplasmic Reticulum] + Sec63p[Endoplasmic Reticulum]	protein folding
S000005575-F-G5-Kar2ADPcplx[Endoplasmic Reticulum] + 5 Sil1p[Endoplasmic Reticulum] + 5 Lhs1p[Endoplasmic Reticulum] + 5 ATP[Endoplasmic Reticulum] => S000005575-F-G5[Endoplasmic Reticulum] + 5 Sil1p[Endoplasmic Reticulum] + 5 Lhs1p[Endoplasmic Reticulum] + 5 ADP[Endoplasmic Reticulum] + 5 Kar2p[Endoplasmic Reticulum] protein folding	protein folding	Lhs1p;Sil1p
S000005575-F-G5[Endoplasmic Reticulum] + Sar1-GTP[Endoplasmic Reticulum] + Sec23-Sec24C[Cytoplasm] + Bet1p[Endoplasmic Reticulum] + Bos1p[Endoplasmic Reticulum] => S000005575-F-G5-COPII-pbud-cplx[Endoplasmic Reticulum]	COPII (for transmembrane cargo)	Sar1p;Sec23p;Sec24p;Bet1p;Bos1p
S000005575-F-G7orG5-COPII-pbud-cplx[Endoplasmic Reticulum] + Sec13-Sec31C[Cytoplasm] + Sec16p[Endoplasmic Reticulum] + Sed4p[Endoplasmic Reticulum] + Sec17p[Endoplasmic Reticulum] => S000005575-F-G5orG7-COPII[COPII]	COPII(common	Sec13p;Sec31p;Sec16p;Sed4p;Sec17p;Sec22p
S000005575-F-G5-COPII[COPII] + TRAPPIC[COPII] + Ypt1p[COPII] + GTP[COPII] => S000005575-F-G5[Golgi] + sar1-GDP[Cytoplasm] + pi[Cytoplasm] + Sec13-Sec31C[Cytoplasm] + Sec16p[Cytoplasm] + Sec12-Sed24C[Cytoplasm] + Bet3p[Cytoplasm] + Bet5p[Cytoplasm] + Trs20p[Cytoplasm] + Trs23p[Cytoplasm] + Trs31p[Cytoplasm] + Trs33p[Cytoplasm] + Bet1p[Endoplasmic Reticulum] + Bos1p[Endoplasmic Reticulum]	COPII (for transmembrane cargo)	Ypt1p;Uso1p;bug1p;Bet3p;Bet5p;Trs20p;Trs23p;Trs31p;Trs33p
S000005575-misf-G8-cplx[Endoplasmic Reticulum] + 0.1 Hrd1p[Endoplasmic Reticulum] => S000005575-misf-G8-HRDcplx[Endoplasmic Reticulum]	ERADM	Hrd1p
S000005575-misf-G8-HRDcplx[Endoplasmic Reticulum] + 0.1 Ubc7p[Cytoplasm] + 0.1 Cue1p[Cytoplasm] + 0.1 AAAC[Cytoplasm] => S000005575-misf-G8-UBcplx[Endoplasmic Reticulum] + 0.1 Hrd1p[Endoplasmic Reticulum] + 0.1 Usa1p[Endoplasmic Reticulum] + 0.1 Der1p[Endoplasmic Reticulum]	ERADM	Ubc7p; Cue1p;Usa1p; Der1p
S000005575-misf-G8-UBcplx[Endoplasmic Reticulum] + 5 ATP[Cytoplasm] + 5 Ubiquitin[Cytoplasm] => S000005575-misf-G8-Ubiquitin[Cytoplasm] + Ubc7p[Cytoplasm] + 0.1 Cue1p[Cytoplasm] + 0.1 Ubx2p[Endoplasmic Reticulum] + 0.1 Cdc48p[Cytoplasm] + 0.1 Ufd1p[Cytoplasm] + 0.1 Npl4p[Cytoplasm] + 0.1 Usa1p[Endoplasmic Reticulum] + 0.1 Der1p[Endoplasmic Reticulum] + 5 AMP[Cytoplasm] + 5 ppi[Cytoplasm]	ERADM	Ubx2p; Cdc48p; Ufd1p;Npl4p;Ubiquitin
S000005575-misf-G8-Ubiquitin[Cytoplasm] + 0.1 Dsk2p[Cytoplasm] + 0.1 Rad23p[Cytoplasm] + 0.1 Png1p[Cytoplasm] + 5 ATP[Cytoplasm] + 0.1 26sproteosome[Cytoplasm] + 5 H2O[Cytoplasm] => G8[Cytoplasm] + 5 Ubiquitin[Cytoplasm] + 5 ADP[Cytoplasm] + 5 pi[Cytoplasm] + S000005575aa[Cytoplasm]	ERADM	Png1p;26sproteosome
S000005575-G5orG7[Golgi] + GDP-man[Golgi] => S000005575-G9[Golgi] + GDP[Golgi]	Golgi processing	Och1p
S000005575-G9[Golgi] + 5 GDP-man[Golgi] => S000005575-G10[Golgi] + 5 GDP[Golgi]	Golgi processing	Mnn9p;Van1p
S000005575-G10[Golgi] + 40 GDP-man[Golgi] => S000005575-G11[Golgi] + 40 GDP[Golgi]	Golgi processing	Anp1p;Mnn9p;Mnn10p;Mnn11p;Hoc1p
S000005575-G15[Golgi] => S000005575-G16[Golgi] + aminoacid[Golgi]	Golgi processing	Kex1p;Kex2p;Ste13p
S000005575-M1[Golgi] + GTP[Cytoplasm] + clathrinC[Cytoplasm] + Arf1p[Cytoplasm] + EXOC[Cytoplasm] => S000005575-M1[cell membrane] + GDP[Golgi] + 2 Chc1p[Cytoplasm] + Clc1p[Cytoplasm] + Arf1p[Cytoplasm] + Sec3p[Cytoplasm] + Sec5p[Cytoplasm] + Sec6p[Cytoplasm] + Sec8p[Cytoplasm] + Sec10p[Cytoplasm] + Sec15p[Cytoplasm] + Exo70p[Cytoplasm] + Exo84p[Cytoplasm] + Sec4p[Cytoplasm]	LDSV(low density Secretory vesicle)	Arf1p;Sec3p;Sec5p;Sec6p;Sec8p;Sec10p;Sec15p;Exo70p;Exo84p;Sec4p;Chc1p;Clc1p
S000001534[Cytoplasm] + SRPC[Cytoplasm] => S000001534-SRPC[Cytoplasm]	translocation from cytosol to ER (SRP-dependent)	Srp14p;Srp21p;Srp54p;Sec65p;Srp68p;Srp72p
S000001534-SRPC[Cytoplasm] + SRC[Endoplasmic Reticulum] => S000001534-SRPC-SRC[Cytoplasm]	translocation from cytosol to ER (SRP-dependent)	Srp101p;Srp102p
S000001534-SRPC-SRC[Cytoplasm] + 2 GTP[Cytoplasm] + SEC61C[Endoplasmic Reticulum] => S000001534-SRPC-SRC-SEC61C[Cytoplasm]	translocation from cytosol to ER (SRP-dependent)	Sec61p;Sbh1p;Sss1p;Ssh1p
S000001534-SRPC-SRC-SEC61C[Cytoplasm] => S000001534-SEC61C[Cytoplasm] + Srp14p[Cytoplasm] + Srp21p[Cytoplasm] + Srp68p[Cytoplasm] + Sec65p[Cytoplasm] + Srp72p[Cytoplasm] + scR1[Cytoplasm] + Srp54p[Cytoplasm] + Srp51p[Cytoplasm] + Srp52p[Cytoplasm] + 2 GDP[Cytoplasm] + 2 pi[Cytoplasm]	translocation from cytosol to ER (SRP-dependent)
S000001534-SEC61C[Cytoplasm] + SPC[Endoplasmic Reticulum] => S000001534[Endoplasmic Reticulum] + Sec61p[Endoplasmic Reticulum] + Sbh1p[Endoplasmic Reticulum] + Sss1p[Endoplasmic Reticulum] + Sec11p[Endoplasmic Reticulum] + Spc1p[Endoplasmic Reticulum] + Spc2p[Endoplasmic Reticulum] + Spc3p[Endoplasmic Reticulum] + sp[Cytoplasm]	translocation from cytosol to ER (SRP-dependent)	Sec11p;Spc1p;Spc2p;Spc3p
S000001534-G1-SEC61C[Endoplasmic Reticulum] => S000001534-G1[Endoplasmic Reticulum] + SEC61C[Endoplasmic Reticulum]	protein folding
S000001534-G5[Endoplasmic Reticulum] + 5 Kar2p[Endoplasmic Reticulum] + 5 ATP[Endoplasmic Reticulum] + 5 Scj1p[Endoplasmic Reticulum] + 5 Jem1p[Endoplasmic Reticulum] + 5 Sec63p[Endoplasmic Reticulum] => S000001534-G5-Kar2ATPcplx[Endoplasmic Reticulum]	protein folding	Kar2p;Scj1p;Jem1p;Sec63p
S000001534-G5-Kar2ATPcplx-[Endoplasmic Reticulum] => S000001534-F-G5-Kar2ADPcplx[Endoplasmic Reticulum] + 5 Scj1p[Endoplasmic Reticulum] + 5 Jem1p[Endoplasmic Reticulum] + 5 pi[Endoplasmic Reticulum] + Sec63p[Endoplasmic Reticulum]	protein folding
S000001534-F-G5-Kar2ADPcplx[Endoplasmic Reticulum] + 5 Sil1p[Endoplasmic Reticulum] + 5 Lhs1p[Endoplasmic Reticulum] + 5 ATP[Endoplasmic Reticulum] => S000001534-F-G5[Endoplasmic Reticulum] + 5 Sil1p[Endoplasmic Reticulum] + 5 Lhs1p[Endoplasmic Reticulum] + 5 ADP[Endoplasmic Reticulum] + 5 Kar2p[Endoplasmic Reticulum] protein folding	protein folding	Lhs1p;Sil1p
S000001534-F-G5[Endoplasmic Reticulum] + Sar1-GTP[Endoplasmic Reticulum] + Sec23-Sec24C[Cytoplasm] + Bet1p[Endoplasmic Reticulum] + Bos1p[Endoplasmic Reticulum] => S000001534-F-G5-COPII-pbud-cplx[Endoplasmic Reticulum]	COPII (for transmembrane cargo)	Sar1p;Sec23p;Sec24p;Bet1p;Bos1p
S000001534-F-G7orG5-COPII-pbud-cplx[Endoplasmic Reticulum] + Sec13-Sec31C[Cytoplasm] + Sec16p[Endoplasmic Reticulum] + Sed4p[Endoplasmic Reticulum] + Sec17p[Endoplasmic Reticulum] => S000001534-F-G5orG7-COPII[COPII]	COPII(common	Sec13p;Sec31p;Sec16p;Sed4p;Sec17p;Sec22p
S000001534-F-G5-COPII[COPII] + TRAPPIC[COPII] + Ypt1p[COPII] + GTP[COPII] => S000001534-F-G5[Golgi] + sar1-GDP[Cytoplasm] + pi[Cytoplasm] + Sec13-Sec31C[Cytoplasm] + Sec16p[Cytoplasm] + Sec12-Sed24C[Cytoplasm] + Bet3p[Cytoplasm] + Bet5p[Cytoplasm] + Trs20p[Cytoplasm] + Trs23p[Cytoplasm] + Trs31p[Cytoplasm] + Trs33p[Cytoplasm] + Bet1p[Endoplasmic Reticulum] + Bos1p[Endoplasmic Reticulum]	COPII (for transmembrane cargo)	Ypt1p;Uso1p;bug1p;Bet3p;Bet5p;Trs20p;Trs23p;Trs31p;Trs33p
S000001534-misf-G8-cplx[Endoplasmic Reticulum] + 0.1 Hrd1p[Endoplasmic Reticulum] => S000001534-misf-G8-HRDcplx[Endoplasmic Reticulum]	ERADM	Hrd1p
S000001534-misf-G8-HRDcplx[Endoplasmic Reticulum] + 0.1 Ubc7p[Cytoplasm] + 0.1 Cue1p[Cytoplasm] + 0.1 AAAC[Cytoplasm] => S000001534-misf-G8-UBcplx[Endoplasmic Reticulum] + 0.1 Hrd1p[Endoplasmic Reticulum] + 0.1 Usa1p[Endoplasmic Reticulum] + 0.1 Der1p[Endoplasmic Reticulum]	ERADM	Ubc7p; Cue1p;Usa1p; Der1p
S000001534-misf-G8-UBcplx[Endoplasmic Reticulum] + 5 ATP[Cytoplasm] + 5 Ubiquitin[Cytoplasm] => S000001534-misf-G8-Ubiquitin[Cytoplasm] + Ubc7p[Cytoplasm] + 0.1 Cue1p[Cytoplasm] + 0.1 Ubx2p[Endoplasmic Reticulum] + 0.1 Cdc48p[Cytoplasm] + 0.1 Ufd1p[Cytoplasm] + 0.1 Npl4p[Cytoplasm] + 0.1 Usa1p[Endoplasmic Reticulum] + 0.1 Der1p[Endoplasmic Reticulum] + 5 AMP[Cytoplasm] + 5 ppi[Cytoplasm]	ERADM	Ubx2p; Cdc48p; Ufd1p;Npl4p;Ubiquitin
S000001534-misf-G8-Ubiquitin[Cytoplasm] + 0.1 Dsk2p[Cytoplasm] + 0.1 Rad23p[Cytoplasm] + 0.1 Png1p[Cytoplasm] + 5 ATP[Cytoplasm] + 0.1 26sproteosome[Cytoplasm] + 5 H2O[Cytoplasm] => G8[Cytoplasm] + 5 Ubiquitin[Cytoplasm] + 5 ADP[Cytoplasm] + 5 pi[Cytoplasm] + S000001534aa[Cytoplasm]	ERADM	Png1p;26sproteosome
S000001534-G15[Golgi] => S000001534-G16[Golgi] + aminoacid[Golgi]	Golgi processing	Kex1p;Kex2p;Ste13p
S000001534-M1[Golgi] + GTP[Cytoplasm] + clathrinC[Cytoplasm] + Arf1p[Cytoplasm] + EXOC[Cytoplasm] => S000001534-M1[cell membrane] + GDP[Golgi] + 2 Chc1p[Cytoplasm] + Clc1p[Cytoplasm] + Arf1p[Cytoplasm] + Sec3p[Cytoplasm] + Sec5p[Cytoplasm] + Sec6p[Cytoplasm] + Sec8p[Cytoplasm] + Sec10p[Cytoplasm] + Sec15p[Cytoplasm] + Exo70p[Cytoplasm] + Exo84p[Cytoplasm] + Sec4p[Cytoplasm]	LDSV(low density Secretory vesicle)	Arf1p;Sec3p;Sec5p;Sec6p;Sec8p;Sec10p;Sec15p;Exo70p;Exo84p;Sec4p;Chc1p;Clc1p
S000006013[Cytoplasm] + SRPC[Cytoplasm] => S000006013-SRPC[Cytoplasm]	translocation from cytosol to ER (SRP-dependent)	Srp14p;Srp21p;Srp54p;Sec65p;Srp68p;Srp72p
S000006013-SRPC[Cytoplasm] + SRC[Endoplasmic Reticulum] => S000006013-SRPC-SRC[Cytoplasm]	translocation from cytosol to ER (SRP-dependent)	Srp101p;Srp102p
S000006013-SRPC-SRC[Cytoplasm] + 2 GTP[Cytoplasm] + SEC61C[Endoplasmic Reticulum] => S000006013-SRPC-SRC-SEC61C[Cytoplasm]	translocation from cytosol to ER (SRP-dependent)	Sec61p;Sbh1p;Sss1p;Ssh1p
S000006013-SRPC-SRC-SEC61C[Cytoplasm] => S000006013-SEC61C[Cytoplasm] + Srp14p[Cytoplasm] + Srp21p[Cytoplasm] + Srp68p[Cytoplasm] + Sec65p[Cytoplasm] + Srp72p[Cytoplasm] + scR1[Cytoplasm] + Srp54p[Cytoplasm] + Srp51p[Cytoplasm] + Srp52p[Cytoplasm] + 2 GDP[Cytoplasm] + 2 pi[Cytoplasm]	translocation from cytosol to ER (SRP-dependent)
S000006013-SEC61C[Cytoplasm] + SPC[Endoplasmic Reticulum] => S000006013[Endoplasmic Reticulum] + Sec61p[Endoplasmic Reticulum] + Sbh1p[Endoplasmic Reticulum] + Sss1p[Endoplasmic Reticulum] + Sec11p[Endoplasmic Reticulum] + Spc1p[Endoplasmic Reticulum] + Spc2p[Endoplasmic Reticulum] + Spc3p[Endoplasmic Reticulum] + sp[Cytoplasm]	translocation from cytosol to ER (SRP-dependent)	Sec11p;Spc1p;Spc2p;Spc3p
S000006013-G1-SEC61C[Endoplasmic Reticulum] => S000006013-G1[Endoplasmic Reticulum] + SEC61C[Endoplasmic Reticulum]	protein folding
S000006013-G5[Endoplasmic Reticulum] + 5 Kar2p[Endoplasmic Reticulum] + 5 ATP[Endoplasmic Reticulum] + 5 Scj1p[Endoplasmic Reticulum] + 5 Jem1p[Endoplasmic Reticulum] + 5 Sec63p[Endoplasmic Reticulum] => S000006013-G5-Kar2ATPcplx[Endoplasmic Reticulum]	protein folding	Kar2p;Scj1p;Jem1p;Sec63p
S000006013-G5-Kar2ATPcplx-[Endoplasmic Reticulum] => S000006013-F-G5-Kar2ADPcplx[Endoplasmic Reticulum] + 5 Scj1p[Endoplasmic Reticulum] + 5 Jem1p[Endoplasmic Reticulum] + 5 pi[Endoplasmic Reticulum] + Sec63p[Endoplasmic Reticulum]	protein folding
S000006013-F-G5-Kar2ADPcplx[Endoplasmic Reticulum] + 5 Sil1p[Endoplasmic Reticulum] + 5 Lhs1p[Endoplasmic Reticulum] + 5 ATP[Endoplasmic Reticulum] => S000006013-F-G5[Endoplasmic Reticulum] + 5 Sil1p[Endoplasmic Reticulum] + 5 Lhs1p[Endoplasmic Reticulum] + 5 ADP[Endoplasmic Reticulum] + 5 Kar2p[Endoplasmic Reticulum] protein folding	protein folding	Lhs1p;Sil1p
S000006013-F-G5[Endoplasmic Reticulum] + Sar1-GTP[Endoplasmic Reticulum] + Sec23-Sec24C[Cytoplasm] + Bet1p[Endoplasmic Reticulum] + Bos1p[Endoplasmic Reticulum] => S000006013-F-G5-COPII-pbud-cplx[Endoplasmic Reticulum]	COPII (for transmembrane cargo)	Sar1p;Sec23p;Sec24p;Bet1p;Bos1p
S000006013-F-G7orG5-COPII-pbud-cplx[Endoplasmic Reticulum] + Sec13-Sec31C[Cytoplasm] + Sec16p[Endoplasmic Reticulum] + Sed4p[Endoplasmic Reticulum] + Sec17p[Endoplasmic Reticulum] => S000006013-F-G5orG7-COPII[COPII]	COPII(common	Sec13p;Sec31p;Sec16p;Sed4p;Sec17p;Sec22p
S000006013-F-G5-COPII[COPII] + TRAPPIC[COPII] + Ypt1p[COPII] + GTP[COPII] => S000006013-F-G5[Golgi] + sar1-GDP[Cytoplasm] + pi[Cytoplasm] + Sec13-Sec31C[Cytoplasm] + Sec16p[Cytoplasm] + Sec12-Sed24C[Cytoplasm] + Bet3p[Cytoplasm] + Bet5p[Cytoplasm] + Trs20p[Cytoplasm] + Trs23p[Cytoplasm] + Trs31p[Cytoplasm] + Trs33p[Cytoplasm] + Bet1p[Endoplasmic Reticulum] + Bos1p[Endoplasmic Reticulum]	COPII (for transmembrane cargo)	Ypt1p;Uso1p;bug1p;Bet3p;Bet5p;Trs20p;Trs23p;Trs31p;Trs33p
S000006013-misf-G8-cplx[Endoplasmic Reticulum] + 0.1 Hrd1p[Endoplasmic Reticulum] => S000006013-misf-G8-HRDcplx[Endoplasmic Reticulum]	ERADM	Hrd1p
S000006013-misf-G8-HRDcplx[Endoplasmic Reticulum] + 0.1 Ubc7p[Cytoplasm] + 0.1 Cue1p[Cytoplasm] + 0.1 AAAC[Cytoplasm] => S000006013-misf-G8-UBcplx[Endoplasmic Reticulum] + 0.1 Hrd1p[Endoplasmic Reticulum] + 0.1 Usa1p[Endoplasmic Reticulum] + 0.1 Der1p[Endoplasmic Reticulum]	ERADM	Ubc7p; Cue1p;Usa1p; Der1p
S000006013-misf-G8-UBcplx[Endoplasmic Reticulum] + 5 ATP[Cytoplasm] + 5 Ubiquitin[Cytoplasm] => S000006013-misf-G8-Ubiquitin[Cytoplasm] + Ubc7p[Cytoplasm] + 0.1 Cue1p[Cytoplasm] + 0.1 Ubx2p[Endoplasmic Reticulum] + 0.1 Cdc48p[Cytoplasm] + 0.1 Ufd1p[Cytoplasm] + 0.1 Npl4p[Cytoplasm] + 0.1 Usa1p[Endoplasmic Reticulum] + 0.1 Der1p[Endoplasmic Reticulum] + 5 AMP[Cytoplasm] + 5 ppi[Cytoplasm]	ERADM	Ubx2p; Cdc48p; Ufd1p;Npl4p;Ubiquitin
S000006013-misf-G8-Ubiquitin[Cytoplasm] + 0.1 Dsk2p[Cytoplasm] + 0.1 Rad23p[Cytoplasm] + 0.1 Png1p[Cytoplasm] + 5 ATP[Cytoplasm] + 0.1 26sproteosome[Cytoplasm] + 5 H2O[Cytoplasm] => G8[Cytoplasm] + 5 Ubiquitin[Cytoplasm] + 5 ADP[Cytoplasm] + 5 pi[Cytoplasm] + S000006013aa[Cytoplasm]	ERADM	Png1p;26sproteosome
S000006013-G15[Golgi] => S000006013-G16[Golgi] + aminoacid[Golgi]	Golgi processing	Kex1p;Kex2p;Ste13p
S000006013-M1[Golgi] + GTP[Cytoplasm] + clathrinC[Cytoplasm] + Arf1p[Cytoplasm] + EXOC[Cytoplasm] => S000006013-M1[cell membrane] + GDP[Golgi] + 2 Chc1p[Cytoplasm] + Clc1p[Cytoplasm] + Arf1p[Cytoplasm] + Sec3p[Cytoplasm] + Sec5p[Cytoplasm] + Sec6p[Cytoplasm] + Sec8p[Cytoplasm] + Sec10p[Cytoplasm] + Sec15p[Cytoplasm] + Exo70p[Cytoplasm] + Exo84p[Cytoplasm] + Sec4p[Cytoplasm]	LDSV(low density Secretory vesicle)	Arf1p;Sec3p;Sec5p;Sec6p;Sec8p;Sec10p;Sec15p;Exo70p;Exo84p;Sec4p;Chc1p;Clc1p
S000004516[Cytoplasm] + SRPC[Cytoplasm] => S000004516-SRPC[Cytoplasm]	translocation from cytosol to ER (SRP-dependent)	Srp14p;Srp21p;Srp54p;Sec65p;Srp68p;Srp72p
S000004516-SRPC[Cytoplasm] + SRC[Endoplasmic Reticulum] => S000004516-SRPC-SRC[Cytoplasm]	translocation from cytosol to ER (SRP-dependent)	Srp101p;Srp102p
S000004516-SRPC-SRC[Cytoplasm] + 2 GTP[Cytoplasm] + SEC61C[Endoplasmic Reticulum] => S000004516-SRPC-SRC-SEC61C[Cytoplasm]	translocation from cytosol to ER (SRP-dependent)	Sec61p;Sbh1p;Sss1p;Ssh1p
S000004516-SRPC-SRC-SEC61C[Cytoplasm] => S000004516-SEC61C[Cytoplasm] + Srp14p[Cytoplasm] + Srp21p[Cytoplasm] + Srp68p[Cytoplasm] + Sec65p[Cytoplasm] + Srp72p[Cytoplasm] + scR1[Cytoplasm] + Srp54p[Cytoplasm] + Srp51p[Cytoplasm] + Srp52p[Cytoplasm] + 2 GDP[Cytoplasm] + 2 pi[Cytoplasm]	translocation from cytosol to ER (SRP-dependent)
S000004516-SEC61C[Cytoplasm] + SPC[Endoplasmic Reticulum] => S000004516[Endoplasmic Reticulum] + Sec61p[Endoplasmic Reticulum] + Sbh1p[Endoplasmic Reticulum] + Sss1p[Endoplasmic Reticulum] + Sec11p[Endoplasmic Reticulum] + Spc1p[Endoplasmic Reticulum] + Spc2p[Endoplasmic Reticulum] + Spc3p[Endoplasmic Reticulum] + sp[Cytoplasm]	translocation from cytosol to ER (SRP-dependent)	Sec11p;Spc1p;Spc2p;Spc3p
S000004516-SEC61C[Endoplasmic Reticulum] + 1 Dol-pp-GlcNAc(2)man(9)-Glc(3)[Endoplasmic Reticulum] + OSTC[Endoplasmic Reticulum] => S000004516-G1-SEC61C[Endoplasmic Reticulum] + 1 Dol-ppEndoplasmic Reticulum] + Ost1p[Endoplasmic Reticulum] + Ost2p[Endoplasmic Reticulum] + St3p[Endoplasmic Reticulum] + Ost4p[Endoplasmic Reticulum] + Ost5p[Endoplasmic Reticulum] + Ost6p[Endoplasmic Reticulum] + Stt3…	ER N-glycosylation	Stt3p;Ost1p;Wbp1p;OSt3p;Ost6p;Swp1p;Ost2p;Ost5p;Ost4p
S000004516-G1-SEC61C[Endoplasmic Reticulum] => S000004516-G1[Endoplasmic Reticulum] + SEC61C[Endoplasmic Reticulum]	protein folding
S000004516-G1[Endoplasmic Reticulum] => S000004516-G2[Endoplasmic Reticulum] + Glc[Endoplasmic Reticulum]	protein folding	Cwh41p
S000004516-G2[Endoplasmic Reticulum] => S000004516-G3[Endoplasmic Reticulum] + Glc[Endoplasmic Reticulum]	protein folding	Rot2p
S000004516-G3[Endoplasmic Reticulum] => S000004516-G4[Endoplasmic Reticulum] + Glc[Endoplasmic Reticulum]	protein folding	Rot2p
S000004516-G4[Endoplasmic Reticulum] => S000004516-G5[Endoplasmic Reticulum] + man[Endoplasmic Reticulum]	protein folding	Mns1p
S000004516-G5[Endoplasmic Reticulum] + 5 Kar2p[Endoplasmic Reticulum] + 5 ATP[Endoplasmic Reticulum] + 5 Scj1p[Endoplasmic Reticulum] + 5 Jem1p[Endoplasmic Reticulum] + 5 Sec63p[Endoplasmic Reticulum] => S000004516-G5-Kar2ATPcplx[Endoplasmic Reticulum]	protein folding	Kar2p;Scj1p;Jem1p;Sec63p
S000004516-G5-Kar2ATPcplx-[Endoplasmic Reticulum] => S000004516-F-G5-Kar2ADPcplx[Endoplasmic Reticulum] + 5 Scj1p[Endoplasmic Reticulum] + 5 Jem1p[Endoplasmic Reticulum] + 5 pi[Endoplasmic Reticulum] + Sec63p[Endoplasmic Reticulum]	protein folding
S000004516-F-G5-Kar2ADPcplx[Endoplasmic Reticulum] + 5 Sil1p[Endoplasmic Reticulum] + 5 Lhs1p[Endoplasmic Reticulum] + 5 ATP[Endoplasmic Reticulum] => S000004516-F-G5[Endoplasmic Reticulum] + 5 Sil1p[Endoplasmic Reticulum] + 5 Lhs1p[Endoplasmic Reticulum] + 5 ADP[Endoplasmic Reticulum] + 5 Kar2p[Endoplasmic Reticulum] protein folding	protein folding	Lhs1p;Sil1p
S000004516-F-G5[Endoplasmic Reticulum] + Sar1-GTP[Endoplasmic Reticulum] + Sec23-Sec24C[Cytoplasm] + Bet1p[Endoplasmic Reticulum] + Bos1p[Endoplasmic Reticulum] => S000004516-F-G5-COPII-pbud-cplx[Endoplasmic Reticulum]	COPII (for transmembrane cargo)	Sar1p;Sec23p;Sec24p;Bet1p;Bos1p
S000004516-F-G7orG5-COPII-pbud-cplx[Endoplasmic Reticulum] + Sec13-Sec31C[Cytoplasm] + Sec16p[Endoplasmic Reticulum] + Sed4p[Endoplasmic Reticulum] + Sec17p[Endoplasmic Reticulum] => S000004516-F-G5orG7-COPII[COPII]	COPII(common	Sec13p;Sec31p;Sec16p;Sed4p;Sec17p;Sec22p
S000004516-F-G5-COPII[COPII] + TRAPPIC[COPII] + Ypt1p[COPII] + GTP[COPII] => S000004516-F-G5[Golgi] + sar1-GDP[Cytoplasm] + pi[Cytoplasm] + Sec13-Sec31C[Cytoplasm] + Sec16p[Cytoplasm] + Sec12-Sed24C[Cytoplasm] + Bet3p[Cytoplasm] + Bet5p[Cytoplasm] + Trs20p[Cytoplasm] + Trs23p[Cytoplasm] + Trs31p[Cytoplasm] + Trs33p[Cytoplasm] + Bet1p[Endoplasmic Reticulum] + Bos1p[Endoplasmic Reticulum]	COPII (for transmembrane cargo)	Ypt1p;Uso1p;bug1p;Bet3p;Bet5p;Trs20p;Trs23p;Trs31p;Trs33p
S000004516-misf-G8-cplx[Endoplasmic Reticulum] + 0.1 Hrd1p[Endoplasmic Reticulum] => S000004516-misf-G8-HRDcplx[Endoplasmic Reticulum]	ERADM	Hrd1p
S000004516-misf-G8-HRDcplx[Endoplasmic Reticulum] + 0.1 Ubc7p[Cytoplasm] + 0.1 Cue1p[Cytoplasm] + 0.1 AAAC[Cytoplasm] => S000004516-misf-G8-UBcplx[Endoplasmic Reticulum] + 0.1 Hrd1p[Endoplasmic Reticulum] + 0.1 Usa1p[Endoplasmic Reticulum] + 0.1 Der1p[Endoplasmic Reticulum]	ERADM	Ubc7p; Cue1p;Usa1p; Der1p
S000004516-misf-G8-UBcplx[Endoplasmic Reticulum] + 5 ATP[Cytoplasm] + 5 Ubiquitin[Cytoplasm] => S000004516-misf-G8-Ubiquitin[Cytoplasm] + Ubc7p[Cytoplasm] + 0.1 Cue1p[Cytoplasm] + 0.1 Ubx2p[Endoplasmic Reticulum] + 0.1 Cdc48p[Cytoplasm] + 0.1 Ufd1p[Cytoplasm] + 0.1 Npl4p[Cytoplasm] + 0.1 Usa1p[Endoplasmic Reticulum] + 0.1 Der1p[Endoplasmic Reticulum] + 5 AMP[Cytoplasm] + 5 ppi[Cytoplasm]	ERADM	Ubx2p; Cdc48p; Ufd1p;Npl4p;Ubiquitin
S000004516-misf-G8-Ubiquitin[Cytoplasm] + 0.1 Dsk2p[Cytoplasm] + 0.1 Rad23p[Cytoplasm] + 0.1 Png1p[Cytoplasm] + 5 ATP[Cytoplasm] + 0.1 26sproteosome[Cytoplasm] + 5 H2O[Cytoplasm] => G8[Cytoplasm] + 5 Ubiquitin[Cytoplasm] + 5 ADP[Cytoplasm] + 5 pi[Cytoplasm] + S000004516aa[Cytoplasm]	ERADM	Png1p;26sproteosome
S000004516-G5orG7[Golgi] + GDP-man[Golgi] => S000004516-G9[Golgi] + GDP[Golgi]	Golgi processing	Och1p
S000004516-G9[Golgi] + 5 GDP-man[Golgi] => S000004516-G10[Golgi] + 5 GDP[Golgi]	Golgi processing	Mnn9p;Van1p
S000004516-G10[Golgi] + 40 GDP-man[Golgi] => S000004516-G11[Golgi] + 40 GDP[Golgi]	Golgi processing	Anp1p;Mnn9p;Mnn10p;Mnn11p;Hoc1p
S000004516-G15[Golgi] => S000004516-G16[Golgi] + aminoacid[Golgi]	Golgi processing	Kex1p;Kex2p;Ste13p
S000004516-M1[Golgi] + GTP[Cytoplasm] + clathrinC[Cytoplasm] + Arf1p[Cytoplasm] + EXOC[Cytoplasm] => S000004516-M1[cell membrane] + GDP[Golgi] + 2 Chc1p[Cytoplasm] + Clc1p[Cytoplasm] + Arf1p[Cytoplasm] + Sec3p[Cytoplasm] + Sec5p[Cytoplasm] + Sec6p[Cytoplasm] + Sec8p[Cytoplasm] + Sec10p[Cytoplasm] + Sec15p[Cytoplasm] + Exo70p[Cytoplasm] + Exo84p[Cytoplasm] + Sec4p[Cytoplasm]	LDSV(low density Secretory vesicle)	Arf1p;Sec3p;Sec5p;Sec6p;Sec8p;Sec10p;Sec15p;Exo70p;Exo84p;Sec4p;Chc1p;Clc1p
S000002497[Cytoplasm] + SRPC[Cytoplasm] => S000002497-SRPC[Cytoplasm]	translocation from cytosol to ER (SRP-dependent)	Srp14p;Srp21p;Srp54p;Sec65p;Srp68p;Srp72p
S000002497-SRPC[Cytoplasm] + SRC[Endoplasmic Reticulum] => S000002497-SRPC-SRC[Cytoplasm]	translocation from cytosol to ER (SRP-dependent)	Srp101p;Srp102p
S000002497-SRPC-SRC[Cytoplasm] + 2 GTP[Cytoplasm] + SEC61C[Endoplasmic Reticulum] => S000002497-SRPC-SRC-SEC61C[Cytoplasm]	translocation from cytosol to ER (SRP-dependent)	Sec61p;Sbh1p;Sss1p;Ssh1p
S000002497-SRPC-SRC-SEC61C[Cytoplasm] => S000002497-SEC61C[Cytoplasm] + Srp14p[Cytoplasm] + Srp21p[Cytoplasm] + Srp68p[Cytoplasm] + Sec65p[Cytoplasm] + Srp72p[Cytoplasm] + scR1[Cytoplasm] + Srp54p[Cytoplasm] + Srp51p[Cytoplasm] + Srp52p[Cytoplasm] + 2 GDP[Cytoplasm] + 2 pi[Cytoplasm]	translocation from cytosol to ER (SRP-dependent)
S000002497-SEC61C[Cytoplasm] + SPC[Endoplasmic Reticulum] => S000002497[Endoplasmic Reticulum] + Sec61p[Endoplasmic Reticulum] + Sbh1p[Endoplasmic Reticulum] + Sss1p[Endoplasmic Reticulum] + Sec11p[Endoplasmic Reticulum] + Spc1p[Endoplasmic Reticulum] + Spc2p[Endoplasmic Reticulum] + Spc3p[Endoplasmic Reticulum] + sp[Cytoplasm]	translocation from cytosol to ER (SRP-dependent)	Sec11p;Spc1p;Spc2p;Spc3p
S000002497-SEC61C[Endoplasmic Reticulum] + 2 Dol-pp-GlcNAc(2)man(9)-Glc(3)[Endoplasmic Reticulum] + OSTC[Endoplasmic Reticulum] => S000002497-G1-SEC61C[Endoplasmic Reticulum] + 2 Dol-ppEndoplasmic Reticulum] + Ost1p[Endoplasmic Reticulum] + Ost2p[Endoplasmic Reticulum] + St3p[Endoplasmic Reticulum] + Ost4p[Endoplasmic Reticulum] + Ost5p[Endoplasmic Reticulum] + Ost6p[Endoplasmic Reticulum] + Stt3…	ER N-glycosylation	Stt3p;Ost1p;Wbp1p;OSt3p;Ost6p;Swp1p;Ost2p;Ost5p;Ost4p
S000002497-G1-SEC61C[Endoplasmic Reticulum] => S000002497-G1[Endoplasmic Reticulum] + SEC61C[Endoplasmic Reticulum]	protein folding
S000002497-G1[Endoplasmic Reticulum] => S000002497-G2[Endoplasmic Reticulum] + Glc[Endoplasmic Reticulum]	protein folding	Cwh41p
S000002497-G2[Endoplasmic Reticulum] => S000002497-G3[Endoplasmic Reticulum] + Glc[Endoplasmic Reticulum]	protein folding	Rot2p
S000002497-G3[Endoplasmic Reticulum] => S000002497-G4[Endoplasmic Reticulum] + Glc[Endoplasmic Reticulum]	protein folding	Rot2p
S000002497-G4[Endoplasmic Reticulum] => S000002497-G5[Endoplasmic Reticulum] + man[Endoplasmic Reticulum]	protein folding	Mns1p
S000002497-G5[Endoplasmic Reticulum] + 5 Kar2p[Endoplasmic Reticulum] + 5 ATP[Endoplasmic Reticulum] + 5 Scj1p[Endoplasmic Reticulum] + 5 Jem1p[Endoplasmic Reticulum] + 5 Sec63p[Endoplasmic Reticulum] => S000002497-G5-Kar2ATPcplx[Endoplasmic Reticulum]	protein folding	Kar2p;Scj1p;Jem1p;Sec63p
S000002497-G5-Kar2ATPcplx-[Endoplasmic Reticulum] => S000002497-F-G5-Kar2ADPcplx[Endoplasmic Reticulum] + 5 Scj1p[Endoplasmic Reticulum] + 5 Jem1p[Endoplasmic Reticulum] + 5 pi[Endoplasmic Reticulum] + Sec63p[Endoplasmic Reticulum]	protein folding
S000002497-F-G5-Kar2ADPcplx[Endoplasmic Reticulum] + 5 Sil1p[Endoplasmic Reticulum] + 5 Lhs1p[Endoplasmic Reticulum] + 5 ATP[Endoplasmic Reticulum] => S000002497-F-G5[Endoplasmic Reticulum] + 5 Sil1p[Endoplasmic Reticulum] + 5 Lhs1p[Endoplasmic Reticulum] + 5 ADP[Endoplasmic Reticulum] + 5 Kar2p[Endoplasmic Reticulum] protein folding	protein folding	Lhs1p;Sil1p
S000002497-F-G5[Endoplasmic Reticulum] + Sar1-GTP[Endoplasmic Reticulum] + Sec23-Sec24C[Cytoplasm] + Bet1p[Endoplasmic Reticulum] + Bos1p[Endoplasmic Reticulum] => S000002497-F-G5-COPII-pbud-cplx[Endoplasmic Reticulum]	COPII (for transmembrane cargo)	Sar1p;Sec23p;Sec24p;Bet1p;Bos1p
S000002497-F-G7orG5-COPII-pbud-cplx[Endoplasmic Reticulum] + Sec13-Sec31C[Cytoplasm] + Sec16p[Endoplasmic Reticulum] + Sed4p[Endoplasmic Reticulum] + Sec17p[Endoplasmic Reticulum] => S000002497-F-G5orG7-COPII[COPII]	COPII(common	Sec13p;Sec31p;Sec16p;Sed4p;Sec17p;Sec22p
S000002497-F-G5-COPII[COPII] + TRAPPIC[COPII] + Ypt1p[COPII] + GTP[COPII] => S000002497-F-G5[Golgi] + sar1-GDP[Cytoplasm] + pi[Cytoplasm] + Sec13-Sec31C[Cytoplasm] + Sec16p[Cytoplasm] + Sec12-Sed24C[Cytoplasm] + Bet3p[Cytoplasm] + Bet5p[Cytoplasm] + Trs20p[Cytoplasm] + Trs23p[Cytoplasm] + Trs31p[Cytoplasm] + Trs33p[Cytoplasm] + Bet1p[Endoplasmic Reticulum] + Bos1p[Endoplasmic Reticulum]	COPII (for transmembrane cargo)	Ypt1p;Uso1p;bug1p;Bet3p;Bet5p;Trs20p;Trs23p;Trs31p;Trs33p
S000002497-misf-G8-cplx[Endoplasmic Reticulum] + 0.1 Hrd1p[Endoplasmic Reticulum] => S000002497-misf-G8-HRDcplx[Endoplasmic Reticulum]	ERADM	Hrd1p
S000002497-misf-G8-HRDcplx[Endoplasmic Reticulum] + 0.1 Ubc7p[Cytoplasm] + 0.1 Cue1p[Cytoplasm] + 0.1 AAAC[Cytoplasm] => S000002497-misf-G8-UBcplx[Endoplasmic Reticulum] + 0.1 Hrd1p[Endoplasmic Reticulum] + 0.1 Usa1p[Endoplasmic Reticulum] + 0.1 Der1p[Endoplasmic Reticulum]	ERADM	Ubc7p; Cue1p;Usa1p; Der1p
S000002497-misf-G8-UBcplx[Endoplasmic Reticulum] + 5 ATP[Cytoplasm] + 5 Ubiquitin[Cytoplasm] => S000002497-misf-G8-Ubiquitin[Cytoplasm] + Ubc7p[Cytoplasm] + 0.1 Cue1p[Cytoplasm] + 0.1 Ubx2p[Endoplasmic Reticulum] + 0.1 Cdc48p[Cytoplasm] + 0.1 Ufd1p[Cytoplasm] + 0.1 Npl4p[Cytoplasm] + 0.1 Usa1p[Endoplasmic Reticulum] + 0.1 Der1p[Endoplasmic Reticulum] + 5 AMP[Cytoplasm] + 5 ppi[Cytoplasm]	ERADM	Ubx2p; Cdc48p; Ufd1p;Npl4p;Ubiquitin
S000002497-misf-G8-Ubiquitin[Cytoplasm] + 0.1 Dsk2p[Cytoplasm] + 0.1 Rad23p[Cytoplasm] + 0.1 Png1p[Cytoplasm] + 5 ATP[Cytoplasm] + 0.1 26sproteosome[Cytoplasm] + 5 H2O[Cytoplasm] => G8[Cytoplasm] + 5 Ubiquitin[Cytoplasm] + 5 ADP[Cytoplasm] + 5 pi[Cytoplasm] + S000002497aa[Cytoplasm]	ERADM	Png1p;26sproteosome
S000002497-G5orG7[Golgi] + GDP-man[Golgi] => S000002497-G9[Golgi] + GDP[Golgi]	Golgi processing	Och1p
S000002497-G9[Golgi] + 5 GDP-man[Golgi] => S000002497-G10[Golgi] + 5 GDP[Golgi]	Golgi processing	Mnn9p;Van1p
S000002497-G10[Golgi] + 40 GDP-man[Golgi] => S000002497-G11[Golgi] + 40 GDP[Golgi]	Golgi processing	Anp1p;Mnn9p;Mnn10p;Mnn11p;Hoc1p
S000002497-G15[Golgi] => S000002497-G16[Golgi] + aminoacid[Golgi]	Golgi processing	Kex1p;Kex2p;Ste13p
S000002497-M1[Golgi] + GTP[Cytoplasm] + clathrinC[Cytoplasm] + Arf1p[Cytoplasm] + EXOC[Cytoplasm] => S000002497-M1[cell membrane] + GDP[Golgi] + 2 Chc1p[Cytoplasm] + Clc1p[Cytoplasm] + Arf1p[Cytoplasm] + Sec3p[Cytoplasm] + Sec5p[Cytoplasm] + Sec6p[Cytoplasm] + Sec8p[Cytoplasm] + Sec10p[Cytoplasm] + Sec15p[Cytoplasm] + Exo70p[Cytoplasm] + Exo84p[Cytoplasm] + Sec4p[Cytoplasm]	LDSV(low density Secretory vesicle)	Arf1p;Sec3p;Sec5p;Sec6p;Sec8p;Sec10p;Sec15p;Exo70p;Exo84p;Sec4p;Chc1p;Clc1p
S000003258[Cytoplasm] + SRPC[Cytoplasm] => S000003258-SRPC[Cytoplasm]	translocation from cytosol to ER (SRP-dependent)	Srp14p;Srp21p;Srp54p;Sec65p;Srp68p;Srp72p
S000003258-SRPC[Cytoplasm] + SRC[Endoplasmic Reticulum] => S000003258-SRPC-SRC[Cytoplasm]	translocation from cytosol to ER (SRP-dependent)	Srp101p;Srp102p
S000003258-SRPC-SRC[Cytoplasm] + 2 GTP[Cytoplasm] + SEC61C[Endoplasmic Reticulum] => S000003258-SRPC-SRC-SEC61C[Cytoplasm]	translocation from cytosol to ER (SRP-dependent)	Sec61p;Sbh1p;Sss1p;Ssh1p
S000003258-SRPC-SRC-SEC61C[Cytoplasm] => S000003258-SEC61C[Cytoplasm] + Srp14p[Cytoplasm] + Srp21p[Cytoplasm] + Srp68p[Cytoplasm] + Sec65p[Cytoplasm] + Srp72p[Cytoplasm] + scR1[Cytoplasm] + Srp54p[Cytoplasm] + Srp51p[Cytoplasm] + Srp52p[Cytoplasm] + 2 GDP[Cytoplasm] + 2 pi[Cytoplasm]	translocation from cytosol to ER (SRP-dependent)
S000003258-SEC61C[Cytoplasm] + SPC[Endoplasmic Reticulum] => S000003258[Endoplasmic Reticulum] + Sec61p[Endoplasmic Reticulum] + Sbh1p[Endoplasmic Reticulum] + Sss1p[Endoplasmic Reticulum] + Sec11p[Endoplasmic Reticulum] + Spc1p[Endoplasmic Reticulum] + Spc2p[Endoplasmic Reticulum] + Spc3p[Endoplasmic Reticulum] + sp[Cytoplasm]	translocation from cytosol to ER (SRP-dependent)	Sec11p;Spc1p;Spc2p;Spc3p
S000003258-G1-SEC61C[Endoplasmic Reticulum] => S000003258-G1[Endoplasmic Reticulum] + SEC61C[Endoplasmic Reticulum]	protein folding
S000003258-G5[Endoplasmic Reticulum] + 5 Kar2p[Endoplasmic Reticulum] + 5 ATP[Endoplasmic Reticulum] + 5 Scj1p[Endoplasmic Reticulum] + 5 Jem1p[Endoplasmic Reticulum] + 5 Sec63p[Endoplasmic Reticulum] => S000003258-G5-Kar2ATPcplx[Endoplasmic Reticulum]	protein folding	Kar2p;Scj1p;Jem1p;Sec63p
S000003258-G5-Kar2ATPcplx-[Endoplasmic Reticulum] => S000003258-F-G5-Kar2ADPcplx[Endoplasmic Reticulum] + 5 Scj1p[Endoplasmic Reticulum] + 5 Jem1p[Endoplasmic Reticulum] + 5 pi[Endoplasmic Reticulum] + Sec63p[Endoplasmic Reticulum]	protein folding
S000003258-F-G5-Kar2ADPcplx[Endoplasmic Reticulum] + 5 Sil1p[Endoplasmic Reticulum] + 5 Lhs1p[Endoplasmic Reticulum] + 5 ATP[Endoplasmic Reticulum] => S000003258-F-G5[Endoplasmic Reticulum] + 5 Sil1p[Endoplasmic Reticulum] + 5 Lhs1p[Endoplasmic Reticulum] + 5 ADP[Endoplasmic Reticulum] + 5 Kar2p[Endoplasmic Reticulum] protein folding	protein folding	Lhs1p;Sil1p
S000003258-F-G5[Endoplasmic Reticulum] + Sar1-GTP[Endoplasmic Reticulum] + Sec23-Sec24C[Cytoplasm] + Bet1p[Endoplasmic Reticulum] + Bos1p[Endoplasmic Reticulum] => S000003258-F-G5-COPII-pbud-cplx[Endoplasmic Reticulum]	COPII (for transmembrane cargo)	Sar1p;Sec23p;Sec24p;Bet1p;Bos1p
S000003258-F-G7orG5-COPII-pbud-cplx[Endoplasmic Reticulum] + Sec13-Sec31C[Cytoplasm] + Sec16p[Endoplasmic Reticulum] + Sed4p[Endoplasmic Reticulum] + Sec17p[Endoplasmic Reticulum] => S000003258-F-G5orG7-COPII[COPII]	COPII(common	Sec13p;Sec31p;Sec16p;Sed4p;Sec17p;Sec22p
S000003258-F-G5-COPII[COPII] + TRAPPIC[COPII] + Ypt1p[COPII] + GTP[COPII] => S000003258-F-G5[Golgi] + sar1-GDP[Cytoplasm] + pi[Cytoplasm] + Sec13-Sec31C[Cytoplasm] + Sec16p[Cytoplasm] + Sec12-Sed24C[Cytoplasm] + Bet3p[Cytoplasm] + Bet5p[Cytoplasm] + Trs20p[Cytoplasm] + Trs23p[Cytoplasm] + Trs31p[Cytoplasm] + Trs33p[Cytoplasm] + Bet1p[Endoplasmic Reticulum] + Bos1p[Endoplasmic Reticulum]	COPII (for transmembrane cargo)	Ypt1p;Uso1p;bug1p;Bet3p;Bet5p;Trs20p;Trs23p;Trs31p;Trs33p
S000003258-misf-G8-cplx[Endoplasmic Reticulum] + 0.1 Hrd1p[Endoplasmic Reticulum] => S000003258-misf-G8-HRDcplx[Endoplasmic Reticulum]	ERADM	Hrd1p
S000003258-misf-G8-HRDcplx[Endoplasmic Reticulum] + 0.1 Ubc7p[Cytoplasm] + 0.1 Cue1p[Cytoplasm] + 0.1 AAAC[Cytoplasm] => S000003258-misf-G8-UBcplx[Endoplasmic Reticulum] + 0.1 Hrd1p[Endoplasmic Reticulum] + 0.1 Usa1p[Endoplasmic Reticulum] + 0.1 Der1p[Endoplasmic Reticulum]	ERADM	Ubc7p; Cue1p;Usa1p; Der1p
S000003258-misf-G8-UBcplx[Endoplasmic Reticulum] + 5 ATP[Cytoplasm] + 5 Ubiquitin[Cytoplasm] => S000003258-misf-G8-Ubiquitin[Cytoplasm] + Ubc7p[Cytoplasm] + 0.1 Cue1p[Cytoplasm] + 0.1 Ubx2p[Endoplasmic Reticulum] + 0.1 Cdc48p[Cytoplasm] + 0.1 Ufd1p[Cytoplasm] + 0.1 Npl4p[Cytoplasm] + 0.1 Usa1p[Endoplasmic Reticulum] + 0.1 Der1p[Endoplasmic Reticulum] + 5 AMP[Cytoplasm] + 5 ppi[Cytoplasm]	ERADM	Ubx2p; Cdc48p; Ufd1p;Npl4p;Ubiquitin
S000003258-misf-G8-Ubiquitin[Cytoplasm] + 0.1 Dsk2p[Cytoplasm] + 0.1 Rad23p[Cytoplasm] + 0.1 Png1p[Cytoplasm] + 5 ATP[Cytoplasm] + 0.1 26sproteosome[Cytoplasm] + 5 H2O[Cytoplasm] => G8[Cytoplasm] + 5 Ubiquitin[Cytoplasm] + 5 ADP[Cytoplasm] + 5 pi[Cytoplasm] + S000003258aa[Cytoplasm]	ERADM	Png1p;26sproteosome
S000003258-G15[Golgi] => S000003258-G16[Golgi] + aminoacid[Golgi]	Golgi processing	Kex1p;Kex2p;Ste13p
S000003258-M1[Golgi] + GTP[Cytoplasm] + clathrinC[Cytoplasm] + Arf1p[Cytoplasm] + EXOC[Cytoplasm] => S000003258-M1[cell membrane] + GDP[Golgi] + 2 Chc1p[Cytoplasm] + Clc1p[Cytoplasm] + Arf1p[Cytoplasm] + Sec3p[Cytoplasm] + Sec5p[Cytoplasm] + Sec6p[Cytoplasm] + Sec8p[Cytoplasm] + Sec10p[Cytoplasm] + Sec15p[Cytoplasm] + Exo70p[Cytoplasm] + Exo84p[Cytoplasm] + Sec4p[Cytoplasm]	LDSV(low density Secretory vesicle)	Arf1p;Sec3p;Sec5p;Sec6p;Sec8p;Sec10p;Sec15p;Exo70p;Exo84p;Sec4p;Chc1p;Clc1p
S000001036[Cytoplasm] + SRPC[Cytoplasm] => S000001036-SRPC[Cytoplasm]	translocation from cytosol to ER (SRP-dependent)	Srp14p;Srp21p;Srp54p;Sec65p;Srp68p;Srp72p
S000001036-SRPC[Cytoplasm] + SRC[Endoplasmic Reticulum] => S000001036-SRPC-SRC[Cytoplasm]	translocation from cytosol to ER (SRP-dependent)	Srp101p;Srp102p
S000001036-SRPC-SRC[Cytoplasm] + 2 GTP[Cytoplasm] + SEC61C[Endoplasmic Reticulum] => S000001036-SRPC-SRC-SEC61C[Cytoplasm]	translocation from cytosol to ER (SRP-dependent)	Sec61p;Sbh1p;Sss1p;Ssh1p
S000001036-SRPC-SRC-SEC61C[Cytoplasm] => S000001036-SEC61C[Cytoplasm] + Srp14p[Cytoplasm] + Srp21p[Cytoplasm] + Srp68p[Cytoplasm] + Sec65p[Cytoplasm] + Srp72p[Cytoplasm] + scR1[Cytoplasm] + Srp54p[Cytoplasm] + Srp51p[Cytoplasm] + Srp52p[Cytoplasm] + 2 GDP[Cytoplasm] + 2 pi[Cytoplasm]	translocation from cytosol to ER (SRP-dependent)
S000001036-SEC61C[Cytoplasm] + SPC[Endoplasmic Reticulum] => S000001036[Endoplasmic Reticulum] + Sec61p[Endoplasmic Reticulum] + Sbh1p[Endoplasmic Reticulum] + Sss1p[Endoplasmic Reticulum] + Sec11p[Endoplasmic Reticulum] + Spc1p[Endoplasmic Reticulum] + Spc2p[Endoplasmic Reticulum] + Spc3p[Endoplasmic Reticulum] + sp[Cytoplasm]	translocation from cytosol to ER (SRP-dependent)	Sec11p;Spc1p;Spc2p;Spc3p
S000001036-G1-SEC61C[Endoplasmic Reticulum] => S000001036-G1[Endoplasmic Reticulum] + SEC61C[Endoplasmic Reticulum]	protein folding
S000001036-G5[Endoplasmic Reticulum] + 5 Kar2p[Endoplasmic Reticulum] + 5 ATP[Endoplasmic Reticulum] + 5 Scj1p[Endoplasmic Reticulum] + 5 Jem1p[Endoplasmic Reticulum] + 5 Sec63p[Endoplasmic Reticulum] => S000001036-G5-Kar2ATPcplx[Endoplasmic Reticulum]	protein folding	Kar2p;Scj1p;Jem1p;Sec63p
S000001036-G5-Kar2ATPcplx-[Endoplasmic Reticulum] => S000001036-F-G5-Kar2ADPcplx[Endoplasmic Reticulum] + 5 Scj1p[Endoplasmic Reticulum] + 5 Jem1p[Endoplasmic Reticulum] + 5 pi[Endoplasmic Reticulum] + Sec63p[Endoplasmic Reticulum]	protein folding
S000001036-F-G5-Kar2ADPcplx[Endoplasmic Reticulum] + 5 Sil1p[Endoplasmic Reticulum] + 5 Lhs1p[Endoplasmic Reticulum] + 5 ATP[Endoplasmic Reticulum] => S000001036-F-G5[Endoplasmic Reticulum] + 5 Sil1p[Endoplasmic Reticulum] + 5 Lhs1p[Endoplasmic Reticulum] + 5 ADP[Endoplasmic Reticulum] + 5 Kar2p[Endoplasmic Reticulum] protein folding	protein folding	Lhs1p;Sil1p
S000001036-F-G5[Endoplasmic Reticulum] + Sar1-GTP[Endoplasmic Reticulum] + Sec23-Sec24C[Cytoplasm] + Bet1p[Endoplasmic Reticulum] + Bos1p[Endoplasmic Reticulum] => S000001036-F-G5-COPII-pbud-cplx[Endoplasmic Reticulum]	COPII (for transmembrane cargo)	Sar1p;Sec23p;Sec24p;Bet1p;Bos1p
S000001036-F-G7orG5-COPII-pbud-cplx[Endoplasmic Reticulum] + Sec13-Sec31C[Cytoplasm] + Sec16p[Endoplasmic Reticulum] + Sed4p[Endoplasmic Reticulum] + Sec17p[Endoplasmic Reticulum] => S000001036-F-G5orG7-COPII[COPII]	COPII(common	Sec13p;Sec31p;Sec16p;Sed4p;Sec17p;Sec22p
S000001036-F-G5-COPII[COPII] + TRAPPIC[COPII] + Ypt1p[COPII] + GTP[COPII] => S000001036-F-G5[Golgi] + sar1-GDP[Cytoplasm] + pi[Cytoplasm] + Sec13-Sec31C[Cytoplasm] + Sec16p[Cytoplasm] + Sec12-Sed24C[Cytoplasm] + Bet3p[Cytoplasm] + Bet5p[Cytoplasm] + Trs20p[Cytoplasm] + Trs23p[Cytoplasm] + Trs31p[Cytoplasm] + Trs33p[Cytoplasm] + Bet1p[Endoplasmic Reticulum] + Bos1p[Endoplasmic Reticulum]	COPII (for transmembrane cargo)	Ypt1p;Uso1p;bug1p;Bet3p;Bet5p;Trs20p;Trs23p;Trs31p;Trs33p
S000001036-misf-G8-cplx[Endoplasmic Reticulum] + 0.1 Hrd1p[Endoplasmic Reticulum] => S000001036-misf-G8-HRDcplx[Endoplasmic Reticulum]	ERADM	Hrd1p
S000001036-misf-G8-HRDcplx[Endoplasmic Reticulum] + 0.1 Ubc7p[Cytoplasm] + 0.1 Cue1p[Cytoplasm] + 0.1 AAAC[Cytoplasm] => S000001036-misf-G8-UBcplx[Endoplasmic Reticulum] + 0.1 Hrd1p[Endoplasmic Reticulum] + 0.1 Usa1p[Endoplasmic Reticulum] + 0.1 Der1p[Endoplasmic Reticulum]	ERADM	Ubc7p; Cue1p;Usa1p; Der1p
S000001036-misf-G8-UBcplx[Endoplasmic Reticulum] + 5 ATP[Cytoplasm] + 5 Ubiquitin[Cytoplasm] => S000001036-misf-G8-Ubiquitin[Cytoplasm] + Ubc7p[Cytoplasm] + 0.1 Cue1p[Cytoplasm] + 0.1 Ubx2p[Endoplasmic Reticulum] + 0.1 Cdc48p[Cytoplasm] + 0.1 Ufd1p[Cytoplasm] + 0.1 Npl4p[Cytoplasm] + 0.1 Usa1p[Endoplasmic Reticulum] + 0.1 Der1p[Endoplasmic Reticulum] + 5 AMP[Cytoplasm] + 5 ppi[Cytoplasm]	ERADM	Ubx2p; Cdc48p; Ufd1p;Npl4p;Ubiquitin
S000001036-misf-G8-Ubiquitin[Cytoplasm] + 0.1 Dsk2p[Cytoplasm] + 0.1 Rad23p[Cytoplasm] + 0.1 Png1p[Cytoplasm] + 5 ATP[Cytoplasm] + 0.1 26sproteosome[Cytoplasm] + 5 H2O[Cytoplasm] => G8[Cytoplasm] + 5 Ubiquitin[Cytoplasm] + 5 ADP[Cytoplasm] + 5 pi[Cytoplasm] + S000001036aa[Cytoplasm]	ERADM	Png1p;26sproteosome
S000001036-G15[Golgi] => S000001036-G16[Golgi] + aminoacid[Golgi]	Golgi processing	Kex1p;Kex2p;Ste13p
S000001036-M1[Golgi] + GTP[Cytoplasm] + clathrinC[Cytoplasm] + Arf1p[Cytoplasm] + EXOC[Cytoplasm] => S000001036-M1[cell membrane] + GDP[Golgi] + 2 Chc1p[Cytoplasm] + Clc1p[Cytoplasm] + Arf1p[Cytoplasm] + Sec3p[Cytoplasm] + Sec5p[Cytoplasm] + Sec6p[Cytoplasm] + Sec8p[Cytoplasm] + Sec10p[Cytoplasm] + Sec15p[Cytoplasm] + Exo70p[Cytoplasm] + Exo84p[Cytoplasm] + Sec4p[Cytoplasm]	LDSV(low density Secretory vesicle)	Arf1p;Sec3p;Sec5p;Sec6p;Sec8p;Sec10p;Sec15p;Exo70p;Exo84p;Sec4p;Chc1p;Clc1p
S000005138[Cytoplasm] + SRPC[Cytoplasm] => S000005138-SRPC[Cytoplasm]	translocation from cytosol to ER (SRP-dependent)	Srp14p;Srp21p;Srp54p;Sec65p;Srp68p;Srp72p
S000005138-SRPC[Cytoplasm] + SRC[Endoplasmic Reticulum] => S000005138-SRPC-SRC[Cytoplasm]	translocation from cytosol to ER (SRP-dependent)	Srp101p;Srp102p
S000005138-SRPC-SRC[Cytoplasm] + 2 GTP[Cytoplasm] + SEC61C[Endoplasmic Reticulum] => S000005138-SRPC-SRC-SEC61C[Cytoplasm]	translocation from cytosol to ER (SRP-dependent)	Sec61p;Sbh1p;Sss1p;Ssh1p
S000005138-SRPC-SRC-SEC61C[Cytoplasm] => S000005138-SEC61C[Cytoplasm] + Srp14p[Cytoplasm] + Srp21p[Cytoplasm] + Srp68p[Cytoplasm] + Sec65p[Cytoplasm] + Srp72p[Cytoplasm] + scR1[Cytoplasm] + Srp54p[Cytoplasm] + Srp51p[Cytoplasm] + Srp52p[Cytoplasm] + 2 GDP[Cytoplasm] + 2 pi[Cytoplasm]	translocation from cytosol to ER (SRP-dependent)
S000005138-SEC61C[Cytoplasm] + SPC[Endoplasmic Reticulum] => S000005138[Endoplasmic Reticulum] + Sec61p[Endoplasmic Reticulum] + Sbh1p[Endoplasmic Reticulum] + Sss1p[Endoplasmic Reticulum] + Sec11p[Endoplasmic Reticulum] + Spc1p[Endoplasmic Reticulum] + Spc2p[Endoplasmic Reticulum] + Spc3p[Endoplasmic Reticulum] + sp[Cytoplasm]	translocation from cytosol to ER (SRP-dependent)	Sec11p;Spc1p;Spc2p;Spc3p
S000005138-G1-SEC61C[Endoplasmic Reticulum] => S000005138-G1[Endoplasmic Reticulum] + SEC61C[Endoplasmic Reticulum]	protein folding
S000005138-G5[Endoplasmic Reticulum] + 5 Kar2p[Endoplasmic Reticulum] + 5 ATP[Endoplasmic Reticulum] + 5 Scj1p[Endoplasmic Reticulum] + 5 Jem1p[Endoplasmic Reticulum] + 5 Sec63p[Endoplasmic Reticulum] => S000005138-G5-Kar2ATPcplx[Endoplasmic Reticulum]	protein folding	Kar2p;Scj1p;Jem1p;Sec63p
S000005138-G5-Kar2ATPcplx-[Endoplasmic Reticulum] => S000005138-F-G5-Kar2ADPcplx[Endoplasmic Reticulum] + 5 Scj1p[Endoplasmic Reticulum] + 5 Jem1p[Endoplasmic Reticulum] + 5 pi[Endoplasmic Reticulum] + Sec63p[Endoplasmic Reticulum]	protein folding
S000005138-F-G5-Kar2ADPcplx[Endoplasmic Reticulum] + 5 Sil1p[Endoplasmic Reticulum] + 5 Lhs1p[Endoplasmic Reticulum] + 5 ATP[Endoplasmic Reticulum] => S000005138-F-G5[Endoplasmic Reticulum] + 5 Sil1p[Endoplasmic Reticulum] + 5 Lhs1p[Endoplasmic Reticulum] + 5 ADP[Endoplasmic Reticulum] + 5 Kar2p[Endoplasmic Reticulum] protein folding	protein folding	Lhs1p;Sil1p
S000005138-F-G5[Endoplasmic Reticulum] + Sar1-GTP[Endoplasmic Reticulum] + Sec23-Sec24C[Cytoplasm] + Bet1p[Endoplasmic Reticulum] + Bos1p[Endoplasmic Reticulum] => S000005138-F-G5-COPII-pbud-cplx[Endoplasmic Reticulum]	COPII (for transmembrane cargo)	Sar1p;Sec23p;Sec24p;Bet1p;Bos1p
S000005138-F-G7orG5-COPII-pbud-cplx[Endoplasmic Reticulum] + Sec13-Sec31C[Cytoplasm] + Sec16p[Endoplasmic Reticulum] + Sed4p[Endoplasmic Reticulum] + Sec17p[Endoplasmic Reticulum] => S000005138-F-G5orG7-COPII[COPII]	COPII(common	Sec13p;Sec31p;Sec16p;Sed4p;Sec17p;Sec22p
S000005138-F-G5-COPII[COPII] + TRAPPIC[COPII] + Ypt1p[COPII] + GTP[COPII] => S000005138-F-G5[Golgi] + sar1-GDP[Cytoplasm] + pi[Cytoplasm] + Sec13-Sec31C[Cytoplasm] + Sec16p[Cytoplasm] + Sec12-Sed24C[Cytoplasm] + Bet3p[Cytoplasm] + Bet5p[Cytoplasm] + Trs20p[Cytoplasm] + Trs23p[Cytoplasm] + Trs31p[Cytoplasm] + Trs33p[Cytoplasm] + Bet1p[Endoplasmic Reticulum] + Bos1p[Endoplasmic Reticulum]	COPII (for transmembrane cargo)	Ypt1p;Uso1p;bug1p;Bet3p;Bet5p;Trs20p;Trs23p;Trs31p;Trs33p
S000005138-misf-G8-cplx[Endoplasmic Reticulum] + 0.1 Hrd1p[Endoplasmic Reticulum] => S000005138-misf-G8-HRDcplx[Endoplasmic Reticulum]	ERADM	Hrd1p
S000005138-misf-G8-HRDcplx[Endoplasmic Reticulum] + 0.1 Ubc7p[Cytoplasm] + 0.1 Cue1p[Cytoplasm] + 0.1 AAAC[Cytoplasm] => S000005138-misf-G8-UBcplx[Endoplasmic Reticulum] + 0.1 Hrd1p[Endoplasmic Reticulum] + 0.1 Usa1p[Endoplasmic Reticulum] + 0.1 Der1p[Endoplasmic Reticulum]	ERADM	Ubc7p; Cue1p;Usa1p; Der1p
S000005138-misf-G8-UBcplx[Endoplasmic Reticulum] + 5 ATP[Cytoplasm] + 5 Ubiquitin[Cytoplasm] => S000005138-misf-G8-Ubiquitin[Cytoplasm] + Ubc7p[Cytoplasm] + 0.1 Cue1p[Cytoplasm] + 0.1 Ubx2p[Endoplasmic Reticulum] + 0.1 Cdc48p[Cytoplasm] + 0.1 Ufd1p[Cytoplasm] + 0.1 Npl4p[Cytoplasm] + 0.1 Usa1p[Endoplasmic Reticulum] + 0.1 Der1p[Endoplasmic Reticulum] + 5 AMP[Cytoplasm] + 5 ppi[Cytoplasm]	ERADM	Ubx2p; Cdc48p; Ufd1p;Npl4p;Ubiquitin
S000005138-misf-G8-Ubiquitin[Cytoplasm] + 0.1 Dsk2p[Cytoplasm] + 0.1 Rad23p[Cytoplasm] + 0.1 Png1p[Cytoplasm] + 5 ATP[Cytoplasm] + 0.1 26sproteosome[Cytoplasm] + 5 H2O[Cytoplasm] => G8[Cytoplasm] + 5 Ubiquitin[Cytoplasm] + 5 ADP[Cytoplasm] + 5 pi[Cytoplasm] + S000005138aa[Cytoplasm]	ERADM	Png1p;26sproteosome
S000005138-G15[Golgi] => S000005138-G16[Golgi] + aminoacid[Golgi]	Golgi processing	Kex1p;Kex2p;Ste13p
S000005138-M1[Golgi] + GTP[Cytoplasm] + clathrinC[Cytoplasm] + Arf1p[Cytoplasm] + EXOC[Cytoplasm] => S000005138-M1[cell membrane] + GDP[Golgi] + 2 Chc1p[Cytoplasm] + Clc1p[Cytoplasm] + Arf1p[Cytoplasm] + Sec3p[Cytoplasm] + Sec5p[Cytoplasm] + Sec6p[Cytoplasm] + Sec8p[Cytoplasm] + Sec10p[Cytoplasm] + Sec15p[Cytoplasm] + Exo70p[Cytoplasm] + Exo84p[Cytoplasm] + Sec4p[Cytoplasm]	LDSV(low density Secretory vesicle)	Arf1p;Sec3p;Sec5p;Sec6p;Sec8p;Sec10p;Sec15p;Exo70p;Exo84p;Sec4p;Chc1p;Clc1p
S000001853[Cytoplasm] + SRPC[Cytoplasm] => S000001853-SRPC[Cytoplasm]	translocation from cytosol to ER (SRP-dependent)	Srp14p;Srp21p;Srp54p;Sec65p;Srp68p;Srp72p
S000001853-SRPC[Cytoplasm] + SRC[Endoplasmic Reticulum] => S000001853-SRPC-SRC[Cytoplasm]	translocation from cytosol to ER (SRP-dependent)	Srp101p;Srp102p
S000001853-SRPC-SRC[Cytoplasm] + 2 GTP[Cytoplasm] + SEC61C[Endoplasmic Reticulum] => S000001853-SRPC-SRC-SEC61C[Cytoplasm]	translocation from cytosol to ER (SRP-dependent)	Sec61p;Sbh1p;Sss1p;Ssh1p
S000001853-SRPC-SRC-SEC61C[Cytoplasm] => S000001853-SEC61C[Cytoplasm] + Srp14p[Cytoplasm] + Srp21p[Cytoplasm] + Srp68p[Cytoplasm] + Sec65p[Cytoplasm] + Srp72p[Cytoplasm] + scR1[Cytoplasm] + Srp54p[Cytoplasm] + Srp51p[Cytoplasm] + Srp52p[Cytoplasm] + 2 GDP[Cytoplasm] + 2 pi[Cytoplasm]	translocation from cytosol to ER (SRP-dependent)
S000001853-SEC61C[Cytoplasm] + SPC[Endoplasmic Reticulum] => S000001853[Endoplasmic Reticulum] + Sec61p[Endoplasmic Reticulum] + Sbh1p[Endoplasmic Reticulum] + Sss1p[Endoplasmic Reticulum] + Sec11p[Endoplasmic Reticulum] + Spc1p[Endoplasmic Reticulum] + Spc2p[Endoplasmic Reticulum] + Spc3p[Endoplasmic Reticulum] + sp[Cytoplasm]	translocation from cytosol to ER (SRP-dependent)	Sec11p;Spc1p;Spc2p;Spc3p
S000001853-SEC61C[Endoplasmic Reticulum] + 9 Dol-pp-GlcNAc(2)man(9)-Glc(3)[Endoplasmic Reticulum] + OSTC[Endoplasmic Reticulum] => S000001853-G1-SEC61C[Endoplasmic Reticulum] + 9 Dol-ppEndoplasmic Reticulum] + Ost1p[Endoplasmic Reticulum] + Ost2p[Endoplasmic Reticulum] + St3p[Endoplasmic Reticulum] + Ost4p[Endoplasmic Reticulum] + Ost5p[Endoplasmic Reticulum] + Ost6p[Endoplasmic Reticulum] + Stt3…	ER N-glycosylation	Stt3p;Ost1p;Wbp1p;OSt3p;Ost6p;Swp1p;Ost2p;Ost5p;Ost4p
S000001853-G1-SEC61C[Endoplasmic Reticulum] => S000001853-G1[Endoplasmic Reticulum] + SEC61C[Endoplasmic Reticulum]	protein folding
S000001853-G1[Endoplasmic Reticulum] => S000001853-G2[Endoplasmic Reticulum] + Glc[Endoplasmic Reticulum]	protein folding	Cwh41p
S000001853-G2[Endoplasmic Reticulum] => S000001853-G3[Endoplasmic Reticulum] + Glc[Endoplasmic Reticulum]	protein folding	Rot2p
S000001853-G3[Endoplasmic Reticulum] => S000001853-G4[Endoplasmic Reticulum] + Glc[Endoplasmic Reticulum]	protein folding	Rot2p
S000001853-G4[Endoplasmic Reticulum] => S000001853-G5[Endoplasmic Reticulum] + man[Endoplasmic Reticulum]	protein folding	Mns1p
S000001853-G5[Endoplasmic Reticulum] + 5 Kar2p[Endoplasmic Reticulum] + 5 ATP[Endoplasmic Reticulum] + 5 Scj1p[Endoplasmic Reticulum] + 5 Jem1p[Endoplasmic Reticulum] + 5 Sec63p[Endoplasmic Reticulum] => S000001853-G5-Kar2ATPcplx[Endoplasmic Reticulum]	protein folding	Kar2p;Scj1p;Jem1p;Sec63p
S000001853-G5-Kar2ATPcplx-[Endoplasmic Reticulum] => S000001853-F-G5-Kar2ADPcplx[Endoplasmic Reticulum] + 5 Scj1p[Endoplasmic Reticulum] + 5 Jem1p[Endoplasmic Reticulum] + 5 pi[Endoplasmic Reticulum] + Sec63p[Endoplasmic Reticulum]	protein folding
S000001853-F-G5-Kar2ADPcplx[Endoplasmic Reticulum] + 5 Sil1p[Endoplasmic Reticulum] + 5 Lhs1p[Endoplasmic Reticulum] + 5 ATP[Endoplasmic Reticulum] => S000001853-F-G5[Endoplasmic Reticulum] + 5 Sil1p[Endoplasmic Reticulum] + 5 Lhs1p[Endoplasmic Reticulum] + 5 ADP[Endoplasmic Reticulum] + 5 Kar2p[Endoplasmic Reticulum] protein folding	protein folding	Lhs1p;Sil1p
S000001853-F-G5[Endoplasmic Reticulum] + Sar1-GTP[Endoplasmic Reticulum] + Sec23-Sec24C[Cytoplasm] + Bet1p[Endoplasmic Reticulum] + Bos1p[Endoplasmic Reticulum] => S000001853-F-G5-COPII-pbud-cplx[Endoplasmic Reticulum]	COPII (for transmembrane cargo)	Sar1p;Sec23p;Sec24p;Bet1p;Bos1p
S000001853-F-G7orG5-COPII-pbud-cplx[Endoplasmic Reticulum] + Sec13-Sec31C[Cytoplasm] + Sec16p[Endoplasmic Reticulum] + Sed4p[Endoplasmic Reticulum] + Sec17p[Endoplasmic Reticulum] => S000001853-F-G5orG7-COPII[COPII]	COPII(common	Sec13p;Sec31p;Sec16p;Sed4p;Sec17p;Sec22p
S000001853-F-G5-COPII[COPII] + TRAPPIC[COPII] + Ypt1p[COPII] + GTP[COPII] => S000001853-F-G5[Golgi] + sar1-GDP[Cytoplasm] + pi[Cytoplasm] + Sec13-Sec31C[Cytoplasm] + Sec16p[Cytoplasm] + Sec12-Sed24C[Cytoplasm] + Bet3p[Cytoplasm] + Bet5p[Cytoplasm] + Trs20p[Cytoplasm] + Trs23p[Cytoplasm] + Trs31p[Cytoplasm] + Trs33p[Cytoplasm] + Bet1p[Endoplasmic Reticulum] + Bos1p[Endoplasmic Reticulum]	COPII (for transmembrane cargo)	Ypt1p;Uso1p;bug1p;Bet3p;Bet5p;Trs20p;Trs23p;Trs31p;Trs33p
S000001853-misf-G8-cplx[Endoplasmic Reticulum] + 0.1 Hrd1p[Endoplasmic Reticulum] => S000001853-misf-G8-HRDcplx[Endoplasmic Reticulum]	ERADM	Hrd1p
S000001853-misf-G8-HRDcplx[Endoplasmic Reticulum] + 0.1 Ubc7p[Cytoplasm] + 0.1 Cue1p[Cytoplasm] + 0.1 AAAC[Cytoplasm] => S000001853-misf-G8-UBcplx[Endoplasmic Reticulum] + 0.1 Hrd1p[Endoplasmic Reticulum] + 0.1 Usa1p[Endoplasmic Reticulum] + 0.1 Der1p[Endoplasmic Reticulum]	ERADM	Ubc7p; Cue1p;Usa1p; Der1p
S000001853-misf-G8-UBcplx[Endoplasmic Reticulum] + 5 ATP[Cytoplasm] + 5 Ubiquitin[Cytoplasm] => S000001853-misf-G8-Ubiquitin[Cytoplasm] + Ubc7p[Cytoplasm] + 0.1 Cue1p[Cytoplasm] + 0.1 Ubx2p[Endoplasmic Reticulum] + 0.1 Cdc48p[Cytoplasm] + 0.1 Ufd1p[Cytoplasm] + 0.1 Npl4p[Cytoplasm] + 0.1 Usa1p[Endoplasmic Reticulum] + 0.1 Der1p[Endoplasmic Reticulum] + 5 AMP[Cytoplasm] + 5 ppi[Cytoplasm]	ERADM	Ubx2p; Cdc48p; Ufd1p;Npl4p;Ubiquitin
S000001853-misf-G8-Ubiquitin[Cytoplasm] + 0.1 Dsk2p[Cytoplasm] + 0.1 Rad23p[Cytoplasm] + 0.1 Png1p[Cytoplasm] + 5 ATP[Cytoplasm] + 0.1 26sproteosome[Cytoplasm] + 5 H2O[Cytoplasm] => G8[Cytoplasm] + 5 Ubiquitin[Cytoplasm] + 5 ADP[Cytoplasm] + 5 pi[Cytoplasm] + S000001853aa[Cytoplasm]	ERADM	Png1p;26sproteosome
S000001853-G5orG7[Golgi] + GDP-man[Golgi] => S000001853-G9[Golgi] + GDP[Golgi]	Golgi processing	Och1p
S000001853-G9[Golgi] + 5 GDP-man[Golgi] => S000001853-G10[Golgi] + 5 GDP[Golgi]	Golgi processing	Mnn9p;Van1p
S000001853-G10[Golgi] + 40 GDP-man[Golgi] => S000001853-G11[Golgi] + 40 GDP[Golgi]	Golgi processing	Anp1p;Mnn9p;Mnn10p;Mnn11p;Hoc1p
S000001853-G15[Golgi] => S000001853-G16[Golgi] + aminoacid[Golgi]	Golgi processing	Kex1p;Kex2p;Ste13p
S000001853-M1[Golgi] + GTP[Cytoplasm] + clathrinC[Cytoplasm] + Arf1p[Cytoplasm] + EXOC[Cytoplasm] => S000001853-M1[cell membrane] + GDP[Golgi] + 2 Chc1p[Cytoplasm] + Clc1p[Cytoplasm] + Arf1p[Cytoplasm] + Sec3p[Cytoplasm] + Sec5p[Cytoplasm] + Sec6p[Cytoplasm] + Sec8p[Cytoplasm] + Sec10p[Cytoplasm] + Sec15p[Cytoplasm] + Exo70p[Cytoplasm] + Exo84p[Cytoplasm] + Sec4p[Cytoplasm]	LDSV(low density Secretory vesicle)	Arf1p;Sec3p;Sec5p;Sec6p;Sec8p;Sec10p;Sec15p;Exo70p;Exo84p;Sec4p;Chc1p;Clc1p
S000003246[Cytoplasm] + SRPC[Cytoplasm] => S000003246-SRPC[Cytoplasm]	translocation from cytosol to ER (SRP-dependent)	Srp14p;Srp21p;Srp54p;Sec65p;Srp68p;Srp72p
S000003246-SRPC[Cytoplasm] + SRC[Endoplasmic Reticulum] => S000003246-SRPC-SRC[Cytoplasm]	translocation from cytosol to ER (SRP-dependent)	Srp101p;Srp102p
S000003246-SRPC-SRC[Cytoplasm] + 2 GTP[Cytoplasm] + SEC61C[Endoplasmic Reticulum] => S000003246-SRPC-SRC-SEC61C[Cytoplasm]	translocation from cytosol to ER (SRP-dependent)	Sec61p;Sbh1p;Sss1p;Ssh1p
S000003246-SRPC-SRC-SEC61C[Cytoplasm] => S000003246-SEC61C[Cytoplasm] + Srp14p[Cytoplasm] + Srp21p[Cytoplasm] + Srp68p[Cytoplasm] + Sec65p[Cytoplasm] + Srp72p[Cytoplasm] + scR1[Cytoplasm] + Srp54p[Cytoplasm] + Srp51p[Cytoplasm] + Srp52p[Cytoplasm] + 2 GDP[Cytoplasm] + 2 pi[Cytoplasm]	translocation from cytosol to ER (SRP-dependent)
S000003246-SEC61C[Cytoplasm] + SPC[Endoplasmic Reticulum] => S000003246[Endoplasmic Reticulum] + Sec61p[Endoplasmic Reticulum] + Sbh1p[Endoplasmic Reticulum] + Sss1p[Endoplasmic Reticulum] + Sec11p[Endoplasmic Reticulum] + Spc1p[Endoplasmic Reticulum] + Spc2p[Endoplasmic Reticulum] + Spc3p[Endoplasmic Reticulum] + sp[Cytoplasm]	translocation from cytosol to ER (SRP-dependent)	Sec11p;Spc1p;Spc2p;Spc3p
S000003246-SEC61C[Endoplasmic Reticulum] + 7 Dol-pp-GlcNAc(2)man(9)-Glc(3)[Endoplasmic Reticulum] + OSTC[Endoplasmic Reticulum] => S000003246-G1-SEC61C[Endoplasmic Reticulum] + 7 Dol-ppEndoplasmic Reticulum] + Ost1p[Endoplasmic Reticulum] + Ost2p[Endoplasmic Reticulum] + St3p[Endoplasmic Reticulum] + Ost4p[Endoplasmic Reticulum] + Ost5p[Endoplasmic Reticulum] + Ost6p[Endoplasmic Reticulum] + Stt3…	ER N-glycosylation	Stt3p;Ost1p;Wbp1p;OSt3p;Ost6p;Swp1p;Ost2p;Ost5p;Ost4p
S000003246-G1-SEC61C[Endoplasmic Reticulum] => S000003246-G1[Endoplasmic Reticulum] + SEC61C[Endoplasmic Reticulum]	protein folding
S000003246-G1[Endoplasmic Reticulum] => S000003246-G2[Endoplasmic Reticulum] + Glc[Endoplasmic Reticulum]	protein folding	Cwh41p
S000003246-G2[Endoplasmic Reticulum] => S000003246-G3[Endoplasmic Reticulum] + Glc[Endoplasmic Reticulum]	protein folding	Rot2p
S000003246-G3[Endoplasmic Reticulum] => S000003246-G4[Endoplasmic Reticulum] + Glc[Endoplasmic Reticulum]	protein folding	Rot2p
S000003246-G4[Endoplasmic Reticulum] => S000003246-G5[Endoplasmic Reticulum] + man[Endoplasmic Reticulum]	protein folding	Mns1p
S000003246-G5[Endoplasmic Reticulum] + 5 Kar2p[Endoplasmic Reticulum] + 5 ATP[Endoplasmic Reticulum] + 5 Scj1p[Endoplasmic Reticulum] + 5 Jem1p[Endoplasmic Reticulum] + 5 Sec63p[Endoplasmic Reticulum] => S000003246-G5-Kar2ATPcplx[Endoplasmic Reticulum]	protein folding	Kar2p;Scj1p;Jem1p;Sec63p
S000003246-G5-Kar2ATPcplx-[Endoplasmic Reticulum] => S000003246-F-G5-Kar2ADPcplx[Endoplasmic Reticulum] + 5 Scj1p[Endoplasmic Reticulum] + 5 Jem1p[Endoplasmic Reticulum] + 5 pi[Endoplasmic Reticulum] + Sec63p[Endoplasmic Reticulum]	protein folding
S000003246-F-G5-Kar2ADPcplx[Endoplasmic Reticulum] + 5 Sil1p[Endoplasmic Reticulum] + 5 Lhs1p[Endoplasmic Reticulum] + 5 ATP[Endoplasmic Reticulum] => S000003246-F-G5[Endoplasmic Reticulum] + 5 Sil1p[Endoplasmic Reticulum] + 5 Lhs1p[Endoplasmic Reticulum] + 5 ADP[Endoplasmic Reticulum] + 5 Kar2p[Endoplasmic Reticulum] protein folding	protein folding	Lhs1p;Sil1p
S000003246-F-G5[Endoplasmic Reticulum] + Sar1-GTP[Endoplasmic Reticulum] + Sec23-Sec24C[Cytoplasm] + Bet1p[Endoplasmic Reticulum] + Bos1p[Endoplasmic Reticulum] => S000003246-F-G5-COPII-pbud-cplx[Endoplasmic Reticulum]	COPII (for transmembrane cargo)	Sar1p;Sec23p;Sec24p;Bet1p;Bos1p
S000003246-F-G7orG5-COPII-pbud-cplx[Endoplasmic Reticulum] + Sec13-Sec31C[Cytoplasm] + Sec16p[Endoplasmic Reticulum] + Sed4p[Endoplasmic Reticulum] + Sec17p[Endoplasmic Reticulum] => S000003246-F-G5orG7-COPII[COPII]	COPII(common	Sec13p;Sec31p;Sec16p;Sed4p;Sec17p;Sec22p
S000003246-F-G5-COPII[COPII] + TRAPPIC[COPII] + Ypt1p[COPII] + GTP[COPII] => S000003246-F-G5[Golgi] + sar1-GDP[Cytoplasm] + pi[Cytoplasm] + Sec13-Sec31C[Cytoplasm] + Sec16p[Cytoplasm] + Sec12-Sed24C[Cytoplasm] + Bet3p[Cytoplasm] + Bet5p[Cytoplasm] + Trs20p[Cytoplasm] + Trs23p[Cytoplasm] + Trs31p[Cytoplasm] + Trs33p[Cytoplasm] + Bet1p[Endoplasmic Reticulum] + Bos1p[Endoplasmic Reticulum]	COPII (for transmembrane cargo)	Ypt1p;Uso1p;bug1p;Bet3p;Bet5p;Trs20p;Trs23p;Trs31p;Trs33p
S000003246-misf-G8-cplx[Endoplasmic Reticulum] + 0.1 Hrd1p[Endoplasmic Reticulum] => S000003246-misf-G8-HRDcplx[Endoplasmic Reticulum]	ERADM	Hrd1p
S000003246-misf-G8-HRDcplx[Endoplasmic Reticulum] + 0.1 Ubc7p[Cytoplasm] + 0.1 Cue1p[Cytoplasm] + 0.1 AAAC[Cytoplasm] => S000003246-misf-G8-UBcplx[Endoplasmic Reticulum] + 0.1 Hrd1p[Endoplasmic Reticulum] + 0.1 Usa1p[Endoplasmic Reticulum] + 0.1 Der1p[Endoplasmic Reticulum]	ERADM	Ubc7p; Cue1p;Usa1p; Der1p
S000003246-misf-G8-UBcplx[Endoplasmic Reticulum] + 5 ATP[Cytoplasm] + 5 Ubiquitin[Cytoplasm] => S000003246-misf-G8-Ubiquitin[Cytoplasm] + Ubc7p[Cytoplasm] + 0.1 Cue1p[Cytoplasm] + 0.1 Ubx2p[Endoplasmic Reticulum] + 0.1 Cdc48p[Cytoplasm] + 0.1 Ufd1p[Cytoplasm] + 0.1 Npl4p[Cytoplasm] + 0.1 Usa1p[Endoplasmic Reticulum] + 0.1 Der1p[Endoplasmic Reticulum] + 5 AMP[Cytoplasm] + 5 ppi[Cytoplasm]	ERADM	Ubx2p; Cdc48p; Ufd1p;Npl4p;Ubiquitin
S000003246-misf-G8-Ubiquitin[Cytoplasm] + 0.1 Dsk2p[Cytoplasm] + 0.1 Rad23p[Cytoplasm] + 0.1 Png1p[Cytoplasm] + 5 ATP[Cytoplasm] + 0.1 26sproteosome[Cytoplasm] + 5 H2O[Cytoplasm] => G8[Cytoplasm] + 5 Ubiquitin[Cytoplasm] + 5 ADP[Cytoplasm] + 5 pi[Cytoplasm] + S000003246aa[Cytoplasm]	ERADM	Png1p;26sproteosome
S000003246-G5orG7[Golgi] + GDP-man[Golgi] => S000003246-G9[Golgi] + GDP[Golgi]	Golgi processing	Och1p
S000003246-G9[Golgi] + 5 GDP-man[Golgi] => S000003246-G10[Golgi] + 5 GDP[Golgi]	Golgi processing	Mnn9p;Van1p
S000003246-G10[Golgi] + 40 GDP-man[Golgi] => S000003246-G11[Golgi] + 40 GDP[Golgi]	Golgi processing	Anp1p;Mnn9p;Mnn10p;Mnn11p;Hoc1p
S000003246-G15[Golgi] => S000003246-G16[Golgi] + aminoacid[Golgi]	Golgi processing	Kex1p;Kex2p;Ste13p
S000003246-M1[Golgi] + GTP[Cytoplasm] + clathrinC[Cytoplasm] + Arf1p[Cytoplasm] + EXOC[Cytoplasm] => S000003246-M1[cell membrane] + GDP[Golgi] + 2 Chc1p[Cytoplasm] + Clc1p[Cytoplasm] + Arf1p[Cytoplasm] + Sec3p[Cytoplasm] + Sec5p[Cytoplasm] + Sec6p[Cytoplasm] + Sec8p[Cytoplasm] + Sec10p[Cytoplasm] + Sec15p[Cytoplasm] + Exo70p[Cytoplasm] + Exo84p[Cytoplasm] + Sec4p[Cytoplasm]	LDSV(low density Secretory vesicle)	Arf1p;Sec3p;Sec5p;Sec6p;Sec8p;Sec10p;Sec15p;Exo70p;Exo84p;Sec4p;Chc1p;Clc1p
S000005227[Cytoplasm] + SRPC[Cytoplasm] => S000005227-SRPC[Cytoplasm]	translocation from cytosol to ER (SRP-dependent)	Srp14p;Srp21p;Srp54p;Sec65p;Srp68p;Srp72p
S000005227-SRPC[Cytoplasm] + SRC[Endoplasmic Reticulum] => S000005227-SRPC-SRC[Cytoplasm]	translocation from cytosol to ER (SRP-dependent)	Srp101p;Srp102p
S000005227-SRPC-SRC[Cytoplasm] + 2 GTP[Cytoplasm] + SEC61C[Endoplasmic Reticulum] => S000005227-SRPC-SRC-SEC61C[Cytoplasm]	translocation from cytosol to ER (SRP-dependent)	Sec61p;Sbh1p;Sss1p;Ssh1p
S000005227-SRPC-SRC-SEC61C[Cytoplasm] => S000005227-SEC61C[Cytoplasm] + Srp14p[Cytoplasm] + Srp21p[Cytoplasm] + Srp68p[Cytoplasm] + Sec65p[Cytoplasm] + Srp72p[Cytoplasm] + scR1[Cytoplasm] + Srp54p[Cytoplasm] + Srp51p[Cytoplasm] + Srp52p[Cytoplasm] + 2 GDP[Cytoplasm] + 2 pi[Cytoplasm]	translocation from cytosol to ER (SRP-dependent)
S000005227-SEC61C[Cytoplasm] + SPC[Endoplasmic Reticulum] => S000005227[Endoplasmic Reticulum] + Sec61p[Endoplasmic Reticulum] + Sbh1p[Endoplasmic Reticulum] + Sss1p[Endoplasmic Reticulum] + Sec11p[Endoplasmic Reticulum] + Spc1p[Endoplasmic Reticulum] + Spc2p[Endoplasmic Reticulum] + Spc3p[Endoplasmic Reticulum] + sp[Cytoplasm]	translocation from cytosol to ER (SRP-dependent)	Sec11p;Spc1p;Spc2p;Spc3p
S000005227-G1-SEC61C[Endoplasmic Reticulum] => S000005227-G1[Endoplasmic Reticulum] + SEC61C[Endoplasmic Reticulum]	protein folding
S000005227-G5[Endoplasmic Reticulum] + 5 Kar2p[Endoplasmic Reticulum] + 5 ATP[Endoplasmic Reticulum] + 5 Scj1p[Endoplasmic Reticulum] + 5 Jem1p[Endoplasmic Reticulum] + 5 Sec63p[Endoplasmic Reticulum] => S000005227-G5-Kar2ATPcplx[Endoplasmic Reticulum]	protein folding	Kar2p;Scj1p;Jem1p;Sec63p
S000005227-G5-Kar2ATPcplx-[Endoplasmic Reticulum] => S000005227-F-G5-Kar2ADPcplx[Endoplasmic Reticulum] + 5 Scj1p[Endoplasmic Reticulum] + 5 Jem1p[Endoplasmic Reticulum] + 5 pi[Endoplasmic Reticulum] + Sec63p[Endoplasmic Reticulum]	protein folding
S000005227-F-G5-Kar2ADPcplx[Endoplasmic Reticulum] + 5 Sil1p[Endoplasmic Reticulum] + 5 Lhs1p[Endoplasmic Reticulum] + 5 ATP[Endoplasmic Reticulum] => S000005227-F-G5[Endoplasmic Reticulum] + 5 Sil1p[Endoplasmic Reticulum] + 5 Lhs1p[Endoplasmic Reticulum] + 5 ADP[Endoplasmic Reticulum] + 5 Kar2p[Endoplasmic Reticulum] protein folding	protein folding	Lhs1p;Sil1p
S000005227-F-G5[Endoplasmic Reticulum] + Sar1-GTP[Endoplasmic Reticulum] + Sec23-Sec24C[Cytoplasm] + Bet1p[Endoplasmic Reticulum] + Bos1p[Endoplasmic Reticulum] => S000005227-F-G5-COPII-pbud-cplx[Endoplasmic Reticulum]	COPII (for transmembrane cargo)	Sar1p;Sec23p;Sec24p;Bet1p;Bos1p
S000005227-F-G7orG5-COPII-pbud-cplx[Endoplasmic Reticulum] + Sec13-Sec31C[Cytoplasm] + Sec16p[Endoplasmic Reticulum] + Sed4p[Endoplasmic Reticulum] + Sec17p[Endoplasmic Reticulum] => S000005227-F-G5orG7-COPII[COPII]	COPII(common	Sec13p;Sec31p;Sec16p;Sed4p;Sec17p;Sec22p
S000005227-F-G5-COPII[COPII] + TRAPPIC[COPII] + Ypt1p[COPII] + GTP[COPII] => S000005227-F-G5[Golgi] + sar1-GDP[Cytoplasm] + pi[Cytoplasm] + Sec13-Sec31C[Cytoplasm] + Sec16p[Cytoplasm] + Sec12-Sed24C[Cytoplasm] + Bet3p[Cytoplasm] + Bet5p[Cytoplasm] + Trs20p[Cytoplasm] + Trs23p[Cytoplasm] + Trs31p[Cytoplasm] + Trs33p[Cytoplasm] + Bet1p[Endoplasmic Reticulum] + Bos1p[Endoplasmic Reticulum]	COPII (for transmembrane cargo)	Ypt1p;Uso1p;bug1p;Bet3p;Bet5p;Trs20p;Trs23p;Trs31p;Trs33p
S000005227-misf-G8-cplx[Endoplasmic Reticulum] + 0.1 Hrd1p[Endoplasmic Reticulum] => S000005227-misf-G8-HRDcplx[Endoplasmic Reticulum]	ERADM	Hrd1p
S000005227-misf-G8-HRDcplx[Endoplasmic Reticulum] + 0.1 Ubc7p[Cytoplasm] + 0.1 Cue1p[Cytoplasm] + 0.1 AAAC[Cytoplasm] => S000005227-misf-G8-UBcplx[Endoplasmic Reticulum] + 0.1 Hrd1p[Endoplasmic Reticulum] + 0.1 Usa1p[Endoplasmic Reticulum] + 0.1 Der1p[Endoplasmic Reticulum]	ERADM	Ubc7p; Cue1p;Usa1p; Der1p
S000005227-misf-G8-UBcplx[Endoplasmic Reticulum] + 5 ATP[Cytoplasm] + 5 Ubiquitin[Cytoplasm] => S000005227-misf-G8-Ubiquitin[Cytoplasm] + Ubc7p[Cytoplasm] + 0.1 Cue1p[Cytoplasm] + 0.1 Ubx2p[Endoplasmic Reticulum] + 0.1 Cdc48p[Cytoplasm] + 0.1 Ufd1p[Cytoplasm] + 0.1 Npl4p[Cytoplasm] + 0.1 Usa1p[Endoplasmic Reticulum] + 0.1 Der1p[Endoplasmic Reticulum] + 5 AMP[Cytoplasm] + 5 ppi[Cytoplasm]	ERADM	Ubx2p; Cdc48p; Ufd1p;Npl4p;Ubiquitin
S000005227-misf-G8-Ubiquitin[Cytoplasm] + 0.1 Dsk2p[Cytoplasm] + 0.1 Rad23p[Cytoplasm] + 0.1 Png1p[Cytoplasm] + 5 ATP[Cytoplasm] + 0.1 26sproteosome[Cytoplasm] + 5 H2O[Cytoplasm] => G8[Cytoplasm] + 5 Ubiquitin[Cytoplasm] + 5 ADP[Cytoplasm] + 5 pi[Cytoplasm] + S000005227aa[Cytoplasm]	ERADM	Png1p;26sproteosome
S000005227-G15[Golgi] => S000005227-G16[Golgi] + aminoacid[Golgi]	Golgi processing	Kex1p;Kex2p;Ste13p
S000005227-M1[Golgi] + GTP[Cytoplasm] + clathrinC[Cytoplasm] + Arf1p[Cytoplasm] + EXOC[Cytoplasm] => S000005227-M1[cell membrane] + GDP[Golgi] + 2 Chc1p[Cytoplasm] + Clc1p[Cytoplasm] + Arf1p[Cytoplasm] + Sec3p[Cytoplasm] + Sec5p[Cytoplasm] + Sec6p[Cytoplasm] + Sec8p[Cytoplasm] + Sec10p[Cytoplasm] + Sec15p[Cytoplasm] + Exo70p[Cytoplasm] + Exo84p[Cytoplasm] + Sec4p[Cytoplasm]	LDSV(low density Secretory vesicle)	Arf1p;Sec3p;Sec5p;Sec6p;Sec8p;Sec10p;Sec15p;Exo70p;Exo84p;Sec4p;Chc1p;Clc1p
S000001843[Cytoplasm] + SRPC[Cytoplasm] => S000001843-SRPC[Cytoplasm]	translocation from cytosol to ER (SRP-dependent)	Srp14p;Srp21p;Srp54p;Sec65p;Srp68p;Srp72p
S000001843-SRPC[Cytoplasm] + SRC[Endoplasmic Reticulum] => S000001843-SRPC-SRC[Cytoplasm]	translocation from cytosol to ER (SRP-dependent)	Srp101p;Srp102p
S000001843-SRPC-SRC[Cytoplasm] + 2 GTP[Cytoplasm] + SEC61C[Endoplasmic Reticulum] => S000001843-SRPC-SRC-SEC61C[Cytoplasm]	translocation from cytosol to ER (SRP-dependent)	Sec61p;Sbh1p;Sss1p;Ssh1p
S000001843-SRPC-SRC-SEC61C[Cytoplasm] => S000001843-SEC61C[Cytoplasm] + Srp14p[Cytoplasm] + Srp21p[Cytoplasm] + Srp68p[Cytoplasm] + Sec65p[Cytoplasm] + Srp72p[Cytoplasm] + scR1[Cytoplasm] + Srp54p[Cytoplasm] + Srp51p[Cytoplasm] + Srp52p[Cytoplasm] + 2 GDP[Cytoplasm] + 2 pi[Cytoplasm]	translocation from cytosol to ER (SRP-dependent)
S000001843-SEC61C[Cytoplasm] + SPC[Endoplasmic Reticulum] => S000001843[Endoplasmic Reticulum] + Sec61p[Endoplasmic Reticulum] + Sbh1p[Endoplasmic Reticulum] + Sss1p[Endoplasmic Reticulum] + Sec11p[Endoplasmic Reticulum] + Spc1p[Endoplasmic Reticulum] + Spc2p[Endoplasmic Reticulum] + Spc3p[Endoplasmic Reticulum] + sp[Cytoplasm]	translocation from cytosol to ER (SRP-dependent)	Sec11p;Spc1p;Spc2p;Spc3p
S000001843-G1-SEC61C[Endoplasmic Reticulum] => S000001843-G1[Endoplasmic Reticulum] + SEC61C[Endoplasmic Reticulum]	protein folding
S000001843-G5[Endoplasmic Reticulum] + 5 Kar2p[Endoplasmic Reticulum] + 5 ATP[Endoplasmic Reticulum] + 5 Scj1p[Endoplasmic Reticulum] + 5 Jem1p[Endoplasmic Reticulum] + 5 Sec63p[Endoplasmic Reticulum] => S000001843-G5-Kar2ATPcplx[Endoplasmic Reticulum]	protein folding	Kar2p;Scj1p;Jem1p;Sec63p
S000001843-G5-Kar2ATPcplx-[Endoplasmic Reticulum] => S000001843-F-G5-Kar2ADPcplx[Endoplasmic Reticulum] + 5 Scj1p[Endoplasmic Reticulum] + 5 Jem1p[Endoplasmic Reticulum] + 5 pi[Endoplasmic Reticulum] + Sec63p[Endoplasmic Reticulum]	protein folding
S000001843-F-G5-Kar2ADPcplx[Endoplasmic Reticulum] + 5 Sil1p[Endoplasmic Reticulum] + 5 Lhs1p[Endoplasmic Reticulum] + 5 ATP[Endoplasmic Reticulum] => S000001843-F-G5[Endoplasmic Reticulum] + 5 Sil1p[Endoplasmic Reticulum] + 5 Lhs1p[Endoplasmic Reticulum] + 5 ADP[Endoplasmic Reticulum] + 5 Kar2p[Endoplasmic Reticulum] protein folding	protein folding	Lhs1p;Sil1p
S000001843-F-G5[Endoplasmic Reticulum] + Sar1-GTP[Endoplasmic Reticulum] + Sec23-Sec24C[Cytoplasm] + Bet1p[Endoplasmic Reticulum] + Bos1p[Endoplasmic Reticulum] => S000001843-F-G5-COPII-pbud-cplx[Endoplasmic Reticulum]	COPII (for transmembrane cargo)	Sar1p;Sec23p;Sec24p;Bet1p;Bos1p
S000001843-F-G7orG5-COPII-pbud-cplx[Endoplasmic Reticulum] + Sec13-Sec31C[Cytoplasm] + Sec16p[Endoplasmic Reticulum] + Sed4p[Endoplasmic Reticulum] + Sec17p[Endoplasmic Reticulum] => S000001843-F-G5orG7-COPII[COPII]	COPII(common	Sec13p;Sec31p;Sec16p;Sed4p;Sec17p;Sec22p
S000001843-F-G5-COPII[COPII] + TRAPPIC[COPII] + Ypt1p[COPII] + GTP[COPII] => S000001843-F-G5[Golgi] + sar1-GDP[Cytoplasm] + pi[Cytoplasm] + Sec13-Sec31C[Cytoplasm] + Sec16p[Cytoplasm] + Sec12-Sed24C[Cytoplasm] + Bet3p[Cytoplasm] + Bet5p[Cytoplasm] + Trs20p[Cytoplasm] + Trs23p[Cytoplasm] + Trs31p[Cytoplasm] + Trs33p[Cytoplasm] + Bet1p[Endoplasmic Reticulum] + Bos1p[Endoplasmic Reticulum]	COPII (for transmembrane cargo)	Ypt1p;Uso1p;bug1p;Bet3p;Bet5p;Trs20p;Trs23p;Trs31p;Trs33p
S000001843-misf-G8-cplx[Endoplasmic Reticulum] + 0.1 Hrd1p[Endoplasmic Reticulum] => S000001843-misf-G8-HRDcplx[Endoplasmic Reticulum]	ERADM	Hrd1p
S000001843-misf-G8-HRDcplx[Endoplasmic Reticulum] + 0.1 Ubc7p[Cytoplasm] + 0.1 Cue1p[Cytoplasm] + 0.1 AAAC[Cytoplasm] => S000001843-misf-G8-UBcplx[Endoplasmic Reticulum] + 0.1 Hrd1p[Endoplasmic Reticulum] + 0.1 Usa1p[Endoplasmic Reticulum] + 0.1 Der1p[Endoplasmic Reticulum]	ERADM	Ubc7p; Cue1p;Usa1p; Der1p
S000001843-misf-G8-UBcplx[Endoplasmic Reticulum] + 5 ATP[Cytoplasm] + 5 Ubiquitin[Cytoplasm] => S000001843-misf-G8-Ubiquitin[Cytoplasm] + Ubc7p[Cytoplasm] + 0.1 Cue1p[Cytoplasm] + 0.1 Ubx2p[Endoplasmic Reticulum] + 0.1 Cdc48p[Cytoplasm] + 0.1 Ufd1p[Cytoplasm] + 0.1 Npl4p[Cytoplasm] + 0.1 Usa1p[Endoplasmic Reticulum] + 0.1 Der1p[Endoplasmic Reticulum] + 5 AMP[Cytoplasm] + 5 ppi[Cytoplasm]	ERADM	Ubx2p; Cdc48p; Ufd1p;Npl4p;Ubiquitin
S000001843-misf-G8-Ubiquitin[Cytoplasm] + 0.1 Dsk2p[Cytoplasm] + 0.1 Rad23p[Cytoplasm] + 0.1 Png1p[Cytoplasm] + 5 ATP[Cytoplasm] + 0.1 26sproteosome[Cytoplasm] + 5 H2O[Cytoplasm] => G8[Cytoplasm] + 5 Ubiquitin[Cytoplasm] + 5 ADP[Cytoplasm] + 5 pi[Cytoplasm] + S000001843aa[Cytoplasm]	ERADM	Png1p;26sproteosome
S000001843-G15[Golgi] => S000001843-G16[Golgi] + aminoacid[Golgi]	Golgi processing	Kex1p;Kex2p;Ste13p
S000001843-M1[Golgi] + GTP[Cytoplasm] + clathrinC[Cytoplasm] + Arf1p[Cytoplasm] + EXOC[Cytoplasm] => S000001843-M1[cell membrane] + GDP[Golgi] + 2 Chc1p[Cytoplasm] + Clc1p[Cytoplasm] + Arf1p[Cytoplasm] + Sec3p[Cytoplasm] + Sec5p[Cytoplasm] + Sec6p[Cytoplasm] + Sec8p[Cytoplasm] + Sec10p[Cytoplasm] + Sec15p[Cytoplasm] + Exo70p[Cytoplasm] + Exo84p[Cytoplasm] + Sec4p[Cytoplasm]	LDSV(low density Secretory vesicle)	Arf1p;Sec3p;Sec5p;Sec6p;Sec8p;Sec10p;Sec15p;Exo70p;Exo84p;Sec4p;Chc1p;Clc1p
S000004964[Cytoplasm] + SRPC[Cytoplasm] => S000004964-SRPC[Cytoplasm]	translocation from cytosol to ER (SRP-dependent)	Srp14p;Srp21p;Srp54p;Sec65p;Srp68p;Srp72p
S000004964-SRPC[Cytoplasm] + SRC[Endoplasmic Reticulum] => S000004964-SRPC-SRC[Cytoplasm]	translocation from cytosol to ER (SRP-dependent)	Srp101p;Srp102p
S000004964-SRPC-SRC[Cytoplasm] + 2 GTP[Cytoplasm] + SEC61C[Endoplasmic Reticulum] => S000004964-SRPC-SRC-SEC61C[Cytoplasm]	translocation from cytosol to ER (SRP-dependent)	Sec61p;Sbh1p;Sss1p;Ssh1p
S000004964-SRPC-SRC-SEC61C[Cytoplasm] => S000004964-SEC61C[Cytoplasm] + Srp14p[Cytoplasm] + Srp21p[Cytoplasm] + Srp68p[Cytoplasm] + Sec65p[Cytoplasm] + Srp72p[Cytoplasm] + scR1[Cytoplasm] + Srp54p[Cytoplasm] + Srp51p[Cytoplasm] + Srp52p[Cytoplasm] + 2 GDP[Cytoplasm] + 2 pi[Cytoplasm]	translocation from cytosol to ER (SRP-dependent)
S000004964-SEC61C[Cytoplasm] + SPC[Endoplasmic Reticulum] => S000004964[Endoplasmic Reticulum] + Sec61p[Endoplasmic Reticulum] + Sbh1p[Endoplasmic Reticulum] + Sss1p[Endoplasmic Reticulum] + Sec11p[Endoplasmic Reticulum] + Spc1p[Endoplasmic Reticulum] + Spc2p[Endoplasmic Reticulum] + Spc3p[Endoplasmic Reticulum] + sp[Cytoplasm]	translocation from cytosol to ER (SRP-dependent)	Sec11p;Spc1p;Spc2p;Spc3p
S000004964-SEC61C[Endoplasmic Reticulum] + 1 Dol-pp-GlcNAc(2)man(9)-Glc(3)[Endoplasmic Reticulum] + OSTC[Endoplasmic Reticulum] => S000004964-G1-SEC61C[Endoplasmic Reticulum] + 1 Dol-ppEndoplasmic Reticulum] + Ost1p[Endoplasmic Reticulum] + Ost2p[Endoplasmic Reticulum] + St3p[Endoplasmic Reticulum] + Ost4p[Endoplasmic Reticulum] + Ost5p[Endoplasmic Reticulum] + Ost6p[Endoplasmic Reticulum] + Stt3…	ER N-glycosylation	Stt3p;Ost1p;Wbp1p;OSt3p;Ost6p;Swp1p;Ost2p;Ost5p;Ost4p
S000004964-G1-SEC61C[Endoplasmic Reticulum] => S000004964-G1[Endoplasmic Reticulum] + SEC61C[Endoplasmic Reticulum]	protein folding
S000004964-G1[Endoplasmic Reticulum] => S000004964-G2[Endoplasmic Reticulum] + Glc[Endoplasmic Reticulum]	protein folding	Cwh41p
S000004964-G2[Endoplasmic Reticulum] => S000004964-G3[Endoplasmic Reticulum] + Glc[Endoplasmic Reticulum]	protein folding	Rot2p
S000004964-G3[Endoplasmic Reticulum] => S000004964-G4[Endoplasmic Reticulum] + Glc[Endoplasmic Reticulum]	protein folding	Rot2p
S000004964-G4[Endoplasmic Reticulum] => S000004964-G5[Endoplasmic Reticulum] + man[Endoplasmic Reticulum]	protein folding	Mns1p
S000004964-G5[Endoplasmic Reticulum] + 5 Kar2p[Endoplasmic Reticulum] + 5 ATP[Endoplasmic Reticulum] + 5 Scj1p[Endoplasmic Reticulum] + 5 Jem1p[Endoplasmic Reticulum] + 5 Sec63p[Endoplasmic Reticulum] => S000004964-G5-Kar2ATPcplx[Endoplasmic Reticulum]	protein folding	Kar2p;Scj1p;Jem1p;Sec63p
S000004964-G5-Kar2ATPcplx-[Endoplasmic Reticulum] => S000004964-F-G5-Kar2ADPcplx[Endoplasmic Reticulum] + 5 Scj1p[Endoplasmic Reticulum] + 5 Jem1p[Endoplasmic Reticulum] + 5 pi[Endoplasmic Reticulum] + Sec63p[Endoplasmic Reticulum]	protein folding
S000004964-F-G5-Kar2ADPcplx[Endoplasmic Reticulum] + 5 Sil1p[Endoplasmic Reticulum] + 5 Lhs1p[Endoplasmic Reticulum] + 5 ATP[Endoplasmic Reticulum] => S000004964-F-G5[Endoplasmic Reticulum] + 5 Sil1p[Endoplasmic Reticulum] + 5 Lhs1p[Endoplasmic Reticulum] + 5 ADP[Endoplasmic Reticulum] + 5 Kar2p[Endoplasmic Reticulum] protein folding	protein folding	Lhs1p;Sil1p
S000004964-F-G5[Endoplasmic Reticulum] + Sar1-GTP[Endoplasmic Reticulum] + Sec23-Sec24C[Cytoplasm] + Bet1p[Endoplasmic Reticulum] + Bos1p[Endoplasmic Reticulum] => S000004964-F-G5-COPII-pbud-cplx[Endoplasmic Reticulum]	COPII (for transmembrane cargo)	Sar1p;Sec23p;Sec24p;Bet1p;Bos1p
S000004964-F-G7orG5-COPII-pbud-cplx[Endoplasmic Reticulum] + Sec13-Sec31C[Cytoplasm] + Sec16p[Endoplasmic Reticulum] + Sed4p[Endoplasmic Reticulum] + Sec17p[Endoplasmic Reticulum] => S000004964-F-G5orG7-COPII[COPII]	COPII(common	Sec13p;Sec31p;Sec16p;Sed4p;Sec17p;Sec22p
S000004964-F-G5-COPII[COPII] + TRAPPIC[COPII] + Ypt1p[COPII] + GTP[COPII] => S000004964-F-G5[Golgi] + sar1-GDP[Cytoplasm] + pi[Cytoplasm] + Sec13-Sec31C[Cytoplasm] + Sec16p[Cytoplasm] + Sec12-Sed24C[Cytoplasm] + Bet3p[Cytoplasm] + Bet5p[Cytoplasm] + Trs20p[Cytoplasm] + Trs23p[Cytoplasm] + Trs31p[Cytoplasm] + Trs33p[Cytoplasm] + Bet1p[Endoplasmic Reticulum] + Bos1p[Endoplasmic Reticulum]	COPII (for transmembrane cargo)	Ypt1p;Uso1p;bug1p;Bet3p;Bet5p;Trs20p;Trs23p;Trs31p;Trs33p
S000004964-misf-G8-cplx[Endoplasmic Reticulum] + 0.1 Hrd1p[Endoplasmic Reticulum] => S000004964-misf-G8-HRDcplx[Endoplasmic Reticulum]	ERADM	Hrd1p
S000004964-misf-G8-HRDcplx[Endoplasmic Reticulum] + 0.1 Ubc7p[Cytoplasm] + 0.1 Cue1p[Cytoplasm] + 0.1 AAAC[Cytoplasm] => S000004964-misf-G8-UBcplx[Endoplasmic Reticulum] + 0.1 Hrd1p[Endoplasmic Reticulum] + 0.1 Usa1p[Endoplasmic Reticulum] + 0.1 Der1p[Endoplasmic Reticulum]	ERADM	Ubc7p; Cue1p;Usa1p; Der1p
S000004964-misf-G8-UBcplx[Endoplasmic Reticulum] + 5 ATP[Cytoplasm] + 5 Ubiquitin[Cytoplasm] => S000004964-misf-G8-Ubiquitin[Cytoplasm] + Ubc7p[Cytoplasm] + 0.1 Cue1p[Cytoplasm] + 0.1 Ubx2p[Endoplasmic Reticulum] + 0.1 Cdc48p[Cytoplasm] + 0.1 Ufd1p[Cytoplasm] + 0.1 Npl4p[Cytoplasm] + 0.1 Usa1p[Endoplasmic Reticulum] + 0.1 Der1p[Endoplasmic Reticulum] + 5 AMP[Cytoplasm] + 5 ppi[Cytoplasm]	ERADM	Ubx2p; Cdc48p; Ufd1p;Npl4p;Ubiquitin
S000004964-misf-G8-Ubiquitin[Cytoplasm] + 0.1 Dsk2p[Cytoplasm] + 0.1 Rad23p[Cytoplasm] + 0.1 Png1p[Cytoplasm] + 5 ATP[Cytoplasm] + 0.1 26sproteosome[Cytoplasm] + 5 H2O[Cytoplasm] => G8[Cytoplasm] + 5 Ubiquitin[Cytoplasm] + 5 ADP[Cytoplasm] + 5 pi[Cytoplasm] + S000004964aa[Cytoplasm]	ERADM	Png1p;26sproteosome
S000004964-G5orG7[Golgi] + GDP-man[Golgi] => S000004964-G9[Golgi] + GDP[Golgi]	Golgi processing	Och1p
S000004964-G9[Golgi] + 5 GDP-man[Golgi] => S000004964-G10[Golgi] + 5 GDP[Golgi]	Golgi processing	Mnn9p;Van1p
S000004964-G10[Golgi] + 40 GDP-man[Golgi] => S000004964-G11[Golgi] + 40 GDP[Golgi]	Golgi processing	Anp1p;Mnn9p;Mnn10p;Mnn11p;Hoc1p
S000004964-G15[Golgi] => S000004964-G16[Golgi] + aminoacid[Golgi]	Golgi processing	Kex1p;Kex2p;Ste13p
S000004964-M1[Golgi] + GTP[Cytoplasm] + clathrinC[Cytoplasm] + Arf1p[Cytoplasm] + EXOC[Cytoplasm] => S000004964-M1[cell membrane] + GDP[Golgi] + 2 Chc1p[Cytoplasm] + Clc1p[Cytoplasm] + Arf1p[Cytoplasm] + Sec3p[Cytoplasm] + Sec5p[Cytoplasm] + Sec6p[Cytoplasm] + Sec8p[Cytoplasm] + Sec10p[Cytoplasm] + Sec15p[Cytoplasm] + Exo70p[Cytoplasm] + Exo84p[Cytoplasm] + Sec4p[Cytoplasm]	LDSV(low density Secretory vesicle)	Arf1p;Sec3p;Sec5p;Sec6p;Sec8p;Sec10p;Sec15p;Exo70p;Exo84p;Sec4p;Chc1p;Clc1p
S000004978[Cytoplasm] + SRPC[Cytoplasm] => S000004978-SRPC[Cytoplasm]	translocation from cytosol to ER (SRP-dependent)	Srp14p;Srp21p;Srp54p;Sec65p;Srp68p;Srp72p
S000004978-SRPC[Cytoplasm] + SRC[Endoplasmic Reticulum] => S000004978-SRPC-SRC[Cytoplasm]	translocation from cytosol to ER (SRP-dependent)	Srp101p;Srp102p
S000004978-SRPC-SRC[Cytoplasm] + 2 GTP[Cytoplasm] + SEC61C[Endoplasmic Reticulum] => S000004978-SRPC-SRC-SEC61C[Cytoplasm]	translocation from cytosol to ER (SRP-dependent)	Sec61p;Sbh1p;Sss1p;Ssh1p
S000004978-SRPC-SRC-SEC61C[Cytoplasm] => S000004978-SEC61C[Cytoplasm] + Srp14p[Cytoplasm] + Srp21p[Cytoplasm] + Srp68p[Cytoplasm] + Sec65p[Cytoplasm] + Srp72p[Cytoplasm] + scR1[Cytoplasm] + Srp54p[Cytoplasm] + Srp51p[Cytoplasm] + Srp52p[Cytoplasm] + 2 GDP[Cytoplasm] + 2 pi[Cytoplasm]	translocation from cytosol to ER (SRP-dependent)
S000004978-SEC61C[Cytoplasm] + SPC[Endoplasmic Reticulum] => S000004978[Endoplasmic Reticulum] + Sec61p[Endoplasmic Reticulum] + Sbh1p[Endoplasmic Reticulum] + Sss1p[Endoplasmic Reticulum] + Sec11p[Endoplasmic Reticulum] + Spc1p[Endoplasmic Reticulum] + Spc2p[Endoplasmic Reticulum] + Spc3p[Endoplasmic Reticulum] + sp[Cytoplasm]	translocation from cytosol to ER (SRP-dependent)	Sec11p;Spc1p;Spc2p;Spc3p
S000004978-SEC61C[Endoplasmic Reticulum] + 1 Dol-pp-GlcNAc(2)man(9)-Glc(3)[Endoplasmic Reticulum] + OSTC[Endoplasmic Reticulum] => S000004978-G1-SEC61C[Endoplasmic Reticulum] + 1 Dol-ppEndoplasmic Reticulum] + Ost1p[Endoplasmic Reticulum] + Ost2p[Endoplasmic Reticulum] + St3p[Endoplasmic Reticulum] + Ost4p[Endoplasmic Reticulum] + Ost5p[Endoplasmic Reticulum] + Ost6p[Endoplasmic Reticulum] + Stt3…	ER N-glycosylation	Stt3p;Ost1p;Wbp1p;OSt3p;Ost6p;Swp1p;Ost2p;Ost5p;Ost4p
S000004978-G1-SEC61C[Endoplasmic Reticulum] => S000004978-G1[Endoplasmic Reticulum] + SEC61C[Endoplasmic Reticulum]	protein folding
S000004978-G1[Endoplasmic Reticulum] => S000004978-G2[Endoplasmic Reticulum] + Glc[Endoplasmic Reticulum]	protein folding	Cwh41p
S000004978-G2[Endoplasmic Reticulum] => S000004978-G3[Endoplasmic Reticulum] + Glc[Endoplasmic Reticulum]	protein folding	Rot2p
S000004978-G3[Endoplasmic Reticulum] => S000004978-G4[Endoplasmic Reticulum] + Glc[Endoplasmic Reticulum]	protein folding	Rot2p
S000004978-G4[Endoplasmic Reticulum] => S000004978-G5[Endoplasmic Reticulum] + man[Endoplasmic Reticulum]	protein folding	Mns1p
S000004978-G5[Endoplasmic Reticulum] + 5 Kar2p[Endoplasmic Reticulum] + 5 ATP[Endoplasmic Reticulum] + 5 Scj1p[Endoplasmic Reticulum] + 5 Jem1p[Endoplasmic Reticulum] + 5 Sec63p[Endoplasmic Reticulum] => S000004978-G5-Kar2ATPcplx[Endoplasmic Reticulum]	protein folding	Kar2p;Scj1p;Jem1p;Sec63p
S000004978-G5-Kar2ATPcplx-[Endoplasmic Reticulum] => S000004978-F-G5-Kar2ADPcplx[Endoplasmic Reticulum] + 5 Scj1p[Endoplasmic Reticulum] + 5 Jem1p[Endoplasmic Reticulum] + 5 pi[Endoplasmic Reticulum] + Sec63p[Endoplasmic Reticulum]	protein folding
S000004978-F-G5-Kar2ADPcplx[Endoplasmic Reticulum] + 5 Sil1p[Endoplasmic Reticulum] + 5 Lhs1p[Endoplasmic Reticulum] + 5 ATP[Endoplasmic Reticulum] => S000004978-F-G5[Endoplasmic Reticulum] + 5 Sil1p[Endoplasmic Reticulum] + 5 Lhs1p[Endoplasmic Reticulum] + 5 ADP[Endoplasmic Reticulum] + 5 Kar2p[Endoplasmic Reticulum] protein folding	protein folding	Lhs1p;Sil1p
S000004978-F-G5[Endoplasmic Reticulum] + Sar1-GTP[Endoplasmic Reticulum] + Sec23-Sec24C[Cytoplasm] + Bet1p[Endoplasmic Reticulum] + Bos1p[Endoplasmic Reticulum] => S000004978-F-G5-COPII-pbud-cplx[Endoplasmic Reticulum]	COPII (for transmembrane cargo)	Sar1p;Sec23p;Sec24p;Bet1p;Bos1p
S000004978-F-G7orG5-COPII-pbud-cplx[Endoplasmic Reticulum] + Sec13-Sec31C[Cytoplasm] + Sec16p[Endoplasmic Reticulum] + Sed4p[Endoplasmic Reticulum] + Sec17p[Endoplasmic Reticulum] => S000004978-F-G5orG7-COPII[COPII]	COPII(common	Sec13p;Sec31p;Sec16p;Sed4p;Sec17p;Sec22p
S000004978-F-G5-COPII[COPII] + TRAPPIC[COPII] + Ypt1p[COPII] + GTP[COPII] => S000004978-F-G5[Golgi] + sar1-GDP[Cytoplasm] + pi[Cytoplasm] + Sec13-Sec31C[Cytoplasm] + Sec16p[Cytoplasm] + Sec12-Sed24C[Cytoplasm] + Bet3p[Cytoplasm] + Bet5p[Cytoplasm] + Trs20p[Cytoplasm] + Trs23p[Cytoplasm] + Trs31p[Cytoplasm] + Trs33p[Cytoplasm] + Bet1p[Endoplasmic Reticulum] + Bos1p[Endoplasmic Reticulum]	COPII (for transmembrane cargo)	Ypt1p;Uso1p;bug1p;Bet3p;Bet5p;Trs20p;Trs23p;Trs31p;Trs33p
S000004978-misf-G8-cplx[Endoplasmic Reticulum] + 0.1 Hrd1p[Endoplasmic Reticulum] => S000004978-misf-G8-HRDcplx[Endoplasmic Reticulum]	ERADM	Hrd1p
S000004978-misf-G8-HRDcplx[Endoplasmic Reticulum] + 0.1 Ubc7p[Cytoplasm] + 0.1 Cue1p[Cytoplasm] + 0.1 AAAC[Cytoplasm] => S000004978-misf-G8-UBcplx[Endoplasmic Reticulum] + 0.1 Hrd1p[Endoplasmic Reticulum] + 0.1 Usa1p[Endoplasmic Reticulum] + 0.1 Der1p[Endoplasmic Reticulum]	ERADM	Ubc7p; Cue1p;Usa1p; Der1p
S000004978-misf-G8-UBcplx[Endoplasmic Reticulum] + 5 ATP[Cytoplasm] + 5 Ubiquitin[Cytoplasm] => S000004978-misf-G8-Ubiquitin[Cytoplasm] + Ubc7p[Cytoplasm] + 0.1 Cue1p[Cytoplasm] + 0.1 Ubx2p[Endoplasmic Reticulum] + 0.1 Cdc48p[Cytoplasm] + 0.1 Ufd1p[Cytoplasm] + 0.1 Npl4p[Cytoplasm] + 0.1 Usa1p[Endoplasmic Reticulum] + 0.1 Der1p[Endoplasmic Reticulum] + 5 AMP[Cytoplasm] + 5 ppi[Cytoplasm]	ERADM	Ubx2p; Cdc48p; Ufd1p;Npl4p;Ubiquitin
S000004978-misf-G8-Ubiquitin[Cytoplasm] + 0.1 Dsk2p[Cytoplasm] + 0.1 Rad23p[Cytoplasm] + 0.1 Png1p[Cytoplasm] + 5 ATP[Cytoplasm] + 0.1 26sproteosome[Cytoplasm] + 5 H2O[Cytoplasm] => G8[Cytoplasm] + 5 Ubiquitin[Cytoplasm] + 5 ADP[Cytoplasm] + 5 pi[Cytoplasm] + S000004978aa[Cytoplasm]	ERADM	Png1p;26sproteosome
S000004978-G5orG7[Golgi] + GDP-man[Golgi] => S000004978-G9[Golgi] + GDP[Golgi]	Golgi processing	Och1p
S000004978-G9[Golgi] + 5 GDP-man[Golgi] => S000004978-G10[Golgi] + 5 GDP[Golgi]	Golgi processing	Mnn9p;Van1p
S000004978-G10[Golgi] + 40 GDP-man[Golgi] => S000004978-G11[Golgi] + 40 GDP[Golgi]	Golgi processing	Anp1p;Mnn9p;Mnn10p;Mnn11p;Hoc1p
S000004978-G15[Golgi] => S000004978-G16[Golgi] + aminoacid[Golgi]	Golgi processing	Kex1p;Kex2p;Ste13p
S000004978-M1[Golgi] + GTP[Cytoplasm] + clathrinC[Cytoplasm] + Arf1p[Cytoplasm] + EXOC[Cytoplasm] => S000004978-M1[cell membrane] + GDP[Golgi] + 2 Chc1p[Cytoplasm] + Clc1p[Cytoplasm] + Arf1p[Cytoplasm] + Sec3p[Cytoplasm] + Sec5p[Cytoplasm] + Sec6p[Cytoplasm] + Sec8p[Cytoplasm] + Sec10p[Cytoplasm] + Sec15p[Cytoplasm] + Exo70p[Cytoplasm] + Exo84p[Cytoplasm] + Sec4p[Cytoplasm]	LDSV(low density Secretory vesicle)	Arf1p;Sec3p;Sec5p;Sec6p;Sec8p;Sec10p;Sec15p;Exo70p;Exo84p;Sec4p;Chc1p;Clc1p
S000002828[Cytoplasm] + SRPC[Cytoplasm] => S000002828-SRPC[Cytoplasm]	translocation from cytosol to ER (SRP-dependent)	Srp14p;Srp21p;Srp54p;Sec65p;Srp68p;Srp72p
S000002828-SRPC[Cytoplasm] + SRC[Endoplasmic Reticulum] => S000002828-SRPC-SRC[Cytoplasm]	translocation from cytosol to ER (SRP-dependent)	Srp101p;Srp102p
S000002828-SRPC-SRC[Cytoplasm] + 2 GTP[Cytoplasm] + SEC61C[Endoplasmic Reticulum] => S000002828-SRPC-SRC-SEC61C[Cytoplasm]	translocation from cytosol to ER (SRP-dependent)	Sec61p;Sbh1p;Sss1p;Ssh1p
S000002828-SRPC-SRC-SEC61C[Cytoplasm] => S000002828-SEC61C[Cytoplasm] + Srp14p[Cytoplasm] + Srp21p[Cytoplasm] + Srp68p[Cytoplasm] + Sec65p[Cytoplasm] + Srp72p[Cytoplasm] + scR1[Cytoplasm] + Srp54p[Cytoplasm] + Srp51p[Cytoplasm] + Srp52p[Cytoplasm] + 2 GDP[Cytoplasm] + 2 pi[Cytoplasm]	translocation from cytosol to ER (SRP-dependent)
S000002828-SEC61C[Cytoplasm] + SPC[Endoplasmic Reticulum] => S000002828[Endoplasmic Reticulum] + Sec61p[Endoplasmic Reticulum] + Sbh1p[Endoplasmic Reticulum] + Sss1p[Endoplasmic Reticulum] + Sec11p[Endoplasmic Reticulum] + Spc1p[Endoplasmic Reticulum] + Spc2p[Endoplasmic Reticulum] + Spc3p[Endoplasmic Reticulum] + sp[Cytoplasm]	translocation from cytosol to ER (SRP-dependent)	Sec11p;Spc1p;Spc2p;Spc3p
S000002828-SEC61C[Endoplasmic Reticulum] + 5 Dol-pp-GlcNAc(2)man(9)-Glc(3)[Endoplasmic Reticulum] + OSTC[Endoplasmic Reticulum] => S000002828-G1-SEC61C[Endoplasmic Reticulum] + 5 Dol-ppEndoplasmic Reticulum] + Ost1p[Endoplasmic Reticulum] + Ost2p[Endoplasmic Reticulum] + St3p[Endoplasmic Reticulum] + Ost4p[Endoplasmic Reticulum] + Ost5p[Endoplasmic Reticulum] + Ost6p[Endoplasmic Reticulum] + Stt3…	ER N-glycosylation	Stt3p;Ost1p;Wbp1p;OSt3p;Ost6p;Swp1p;Ost2p;Ost5p;Ost4p
S000002828-G1-SEC61C[Endoplasmic Reticulum] => S000002828-G1[Endoplasmic Reticulum] + SEC61C[Endoplasmic Reticulum]	protein folding
S000002828-G1[Endoplasmic Reticulum] => S000002828-G2[Endoplasmic Reticulum] + Glc[Endoplasmic Reticulum]	protein folding	Cwh41p
S000002828-G2[Endoplasmic Reticulum] => S000002828-G3[Endoplasmic Reticulum] + Glc[Endoplasmic Reticulum]	protein folding	Rot2p
S000002828-G3[Endoplasmic Reticulum] => S000002828-G4[Endoplasmic Reticulum] + Glc[Endoplasmic Reticulum]	protein folding	Rot2p
S000002828-G4[Endoplasmic Reticulum] => S000002828-G5[Endoplasmic Reticulum] + man[Endoplasmic Reticulum]	protein folding	Mns1p
S000002828-G5[Endoplasmic Reticulum] + 5 Kar2p[Endoplasmic Reticulum] + 5 ATP[Endoplasmic Reticulum] + 5 Scj1p[Endoplasmic Reticulum] + 5 Jem1p[Endoplasmic Reticulum] + 5 Sec63p[Endoplasmic Reticulum] => S000002828-G5-Kar2ATPcplx[Endoplasmic Reticulum]	protein folding	Kar2p;Scj1p;Jem1p;Sec63p
S000002828-G5-Kar2ATPcplx-[Endoplasmic Reticulum] => S000002828-F-G5-Kar2ADPcplx[Endoplasmic Reticulum] + 5 Scj1p[Endoplasmic Reticulum] + 5 Jem1p[Endoplasmic Reticulum] + 5 pi[Endoplasmic Reticulum] + Sec63p[Endoplasmic Reticulum]	protein folding
S000002828-F-G5-Kar2ADPcplx[Endoplasmic Reticulum] + 5 Sil1p[Endoplasmic Reticulum] + 5 Lhs1p[Endoplasmic Reticulum] + 5 ATP[Endoplasmic Reticulum] => S000002828-F-G5[Endoplasmic Reticulum] + 5 Sil1p[Endoplasmic Reticulum] + 5 Lhs1p[Endoplasmic Reticulum] + 5 ADP[Endoplasmic Reticulum] + 5 Kar2p[Endoplasmic Reticulum] protein folding	protein folding	Lhs1p;Sil1p
S000002828-F-G5[Endoplasmic Reticulum] + Sar1-GTP[Endoplasmic Reticulum] + Sec23-Sec24C[Cytoplasm] + Bet1p[Endoplasmic Reticulum] + Bos1p[Endoplasmic Reticulum] => S000002828-F-G5-COPII-pbud-cplx[Endoplasmic Reticulum]	COPII (for transmembrane cargo)	Sar1p;Sec23p;Sec24p;Bet1p;Bos1p
S000002828-F-G7orG5-COPII-pbud-cplx[Endoplasmic Reticulum] + Sec13-Sec31C[Cytoplasm] + Sec16p[Endoplasmic Reticulum] + Sed4p[Endoplasmic Reticulum] + Sec17p[Endoplasmic Reticulum] => S000002828-F-G5orG7-COPII[COPII]	COPII(common	Sec13p;Sec31p;Sec16p;Sed4p;Sec17p;Sec22p
S000002828-F-G5-COPII[COPII] + TRAPPIC[COPII] + Ypt1p[COPII] + GTP[COPII] => S000002828-F-G5[Golgi] + sar1-GDP[Cytoplasm] + pi[Cytoplasm] + Sec13-Sec31C[Cytoplasm] + Sec16p[Cytoplasm] + Sec12-Sed24C[Cytoplasm] + Bet3p[Cytoplasm] + Bet5p[Cytoplasm] + Trs20p[Cytoplasm] + Trs23p[Cytoplasm] + Trs31p[Cytoplasm] + Trs33p[Cytoplasm] + Bet1p[Endoplasmic Reticulum] + Bos1p[Endoplasmic Reticulum]	COPII (for transmembrane cargo)	Ypt1p;Uso1p;bug1p;Bet3p;Bet5p;Trs20p;Trs23p;Trs31p;Trs33p
S000002828-misf-G8-cplx[Endoplasmic Reticulum] + 0.1 Hrd1p[Endoplasmic Reticulum] => S000002828-misf-G8-HRDcplx[Endoplasmic Reticulum]	ERADM	Hrd1p
S000002828-misf-G8-HRDcplx[Endoplasmic Reticulum] + 0.1 Ubc7p[Cytoplasm] + 0.1 Cue1p[Cytoplasm] + 0.1 AAAC[Cytoplasm] => S000002828-misf-G8-UBcplx[Endoplasmic Reticulum] + 0.1 Hrd1p[Endoplasmic Reticulum] + 0.1 Usa1p[Endoplasmic Reticulum] + 0.1 Der1p[Endoplasmic Reticulum]	ERADM	Ubc7p; Cue1p;Usa1p; Der1p
S000002828-misf-G8-UBcplx[Endoplasmic Reticulum] + 5 ATP[Cytoplasm] + 5 Ubiquitin[Cytoplasm] => S000002828-misf-G8-Ubiquitin[Cytoplasm] + Ubc7p[Cytoplasm] + 0.1 Cue1p[Cytoplasm] + 0.1 Ubx2p[Endoplasmic Reticulum] + 0.1 Cdc48p[Cytoplasm] + 0.1 Ufd1p[Cytoplasm] + 0.1 Npl4p[Cytoplasm] + 0.1 Usa1p[Endoplasmic Reticulum] + 0.1 Der1p[Endoplasmic Reticulum] + 5 AMP[Cytoplasm] + 5 ppi[Cytoplasm]	ERADM	Ubx2p; Cdc48p; Ufd1p;Npl4p;Ubiquitin
S000002828-misf-G8-Ubiquitin[Cytoplasm] + 0.1 Dsk2p[Cytoplasm] + 0.1 Rad23p[Cytoplasm] + 0.1 Png1p[Cytoplasm] + 5 ATP[Cytoplasm] + 0.1 26sproteosome[Cytoplasm] + 5 H2O[Cytoplasm] => G8[Cytoplasm] + 5 Ubiquitin[Cytoplasm] + 5 ADP[Cytoplasm] + 5 pi[Cytoplasm] + S000002828aa[Cytoplasm]	ERADM	Png1p;26sproteosome
S000002828-G5orG7[Golgi] + GDP-man[Golgi] => S000002828-G9[Golgi] + GDP[Golgi]	Golgi processing	Och1p
S000002828-G9[Golgi] + 5 GDP-man[Golgi] => S000002828-G10[Golgi] + 5 GDP[Golgi]	Golgi processing	Mnn9p;Van1p
S000002828-G10[Golgi] + 40 GDP-man[Golgi] => S000002828-G11[Golgi] + 40 GDP[Golgi]	Golgi processing	Anp1p;Mnn9p;Mnn10p;Mnn11p;Hoc1p
S000002828-G15[Golgi] => S000002828-G16[Golgi] + aminoacid[Golgi]	Golgi processing	Kex1p;Kex2p;Ste13p
S000002828-M1[Golgi] + GTP[Cytoplasm] + clathrinC[Cytoplasm] + Arf1p[Cytoplasm] + EXOC[Cytoplasm] => S000002828-M1[cell membrane] + GDP[Golgi] + 2 Chc1p[Cytoplasm] + Clc1p[Cytoplasm] + Arf1p[Cytoplasm] + Sec3p[Cytoplasm] + Sec5p[Cytoplasm] + Sec6p[Cytoplasm] + Sec8p[Cytoplasm] + Sec10p[Cytoplasm] + Sec15p[Cytoplasm] + Exo70p[Cytoplasm] + Exo84p[Cytoplasm] + Sec4p[Cytoplasm]	LDSV(low density Secretory vesicle)	Arf1p;Sec3p;Sec5p;Sec6p;Sec8p;Sec10p;Sec15p;Exo70p;Exo84p;Sec4p;Chc1p;Clc1p
S000001402[Cytoplasm] + SRPC[Cytoplasm] => S000001402-SRPC[Cytoplasm]	translocation from cytosol to ER (SRP-dependent)	Srp14p;Srp21p;Srp54p;Sec65p;Srp68p;Srp72p
S000001402-SRPC[Cytoplasm] + SRC[Endoplasmic Reticulum] => S000001402-SRPC-SRC[Cytoplasm]	translocation from cytosol to ER (SRP-dependent)	Srp101p;Srp102p
S000001402-SRPC-SRC[Cytoplasm] + 2 GTP[Cytoplasm] + SEC61C[Endoplasmic Reticulum] => S000001402-SRPC-SRC-SEC61C[Cytoplasm]	translocation from cytosol to ER (SRP-dependent)	Sec61p;Sbh1p;Sss1p;Ssh1p
S000001402-SRPC-SRC-SEC61C[Cytoplasm] => S000001402-SEC61C[Cytoplasm] + Srp14p[Cytoplasm] + Srp21p[Cytoplasm] + Srp68p[Cytoplasm] + Sec65p[Cytoplasm] + Srp72p[Cytoplasm] + scR1[Cytoplasm] + Srp54p[Cytoplasm] + Srp51p[Cytoplasm] + Srp52p[Cytoplasm] + 2 GDP[Cytoplasm] + 2 pi[Cytoplasm]	translocation from cytosol to ER (SRP-dependent)
S000001402-SEC61C[Cytoplasm] + SPC[Endoplasmic Reticulum] => S000001402[Endoplasmic Reticulum] + Sec61p[Endoplasmic Reticulum] + Sbh1p[Endoplasmic Reticulum] + Sss1p[Endoplasmic Reticulum] + Sec11p[Endoplasmic Reticulum] + Spc1p[Endoplasmic Reticulum] + Spc2p[Endoplasmic Reticulum] + Spc3p[Endoplasmic Reticulum] + sp[Cytoplasm]	translocation from cytosol to ER (SRP-dependent)	Sec11p;Spc1p;Spc2p;Spc3p
S000001402-SEC61C[Endoplasmic Reticulum] + 16 Dol-pp-GlcNAc(2)man(9)-Glc(3)[Endoplasmic Reticulum] + OSTC[Endoplasmic Reticulum] => S000001402-G1-SEC61C[Endoplasmic Reticulum] + 16 Dol-ppEndoplasmic Reticulum] + Ost1p[Endoplasmic Reticulum] + Ost2p[Endoplasmic Reticulum] + St3p[Endoplasmic Reticulum] + Ost4p[Endoplasmic Reticulum] + Ost5p[Endoplasmic Reticulum] + Ost6p[Endoplasmic Reticulum] + St…	ER N-glycosylation	Stt3p;Ost1p;Wbp1p;OSt3p;Ost6p;Swp1p;Ost2p;Ost5p;Ost4p
S000001402-G1-SEC61C[Endoplasmic Reticulum] => S000001402-G1[Endoplasmic Reticulum] + SEC61C[Endoplasmic Reticulum]	protein folding
S000001402-G1[Endoplasmic Reticulum] => S000001402-G2[Endoplasmic Reticulum] + Glc[Endoplasmic Reticulum]	protein folding	Cwh41p
S000001402-G2[Endoplasmic Reticulum] => S000001402-G3[Endoplasmic Reticulum] + Glc[Endoplasmic Reticulum]	protein folding	Rot2p
S000001402-G3[Endoplasmic Reticulum] => S000001402-G4[Endoplasmic Reticulum] + Glc[Endoplasmic Reticulum]	protein folding	Rot2p
S000001402-G4[Endoplasmic Reticulum] => S000001402-G5[Endoplasmic Reticulum] + man[Endoplasmic Reticulum]	protein folding	Mns1p
S000001402-G5[Endoplasmic Reticulum] + 5 Kar2p[Endoplasmic Reticulum] + 5 ATP[Endoplasmic Reticulum] + 5 Scj1p[Endoplasmic Reticulum] + 5 Jem1p[Endoplasmic Reticulum] + 5 Sec63p[Endoplasmic Reticulum] => S000001402-G5-Kar2ATPcplx[Endoplasmic Reticulum]	protein folding	Kar2p;Scj1p;Jem1p;Sec63p
S000001402-G5-Kar2ATPcplx-[Endoplasmic Reticulum] => S000001402-F-G5-Kar2ADPcplx[Endoplasmic Reticulum] + 5 Scj1p[Endoplasmic Reticulum] + 5 Jem1p[Endoplasmic Reticulum] + 5 pi[Endoplasmic Reticulum] + Sec63p[Endoplasmic Reticulum]	protein folding
S000001402-F-G5-Kar2ADPcplx[Endoplasmic Reticulum] + 5 Sil1p[Endoplasmic Reticulum] + 5 Lhs1p[Endoplasmic Reticulum] + 5 ATP[Endoplasmic Reticulum] => S000001402-F-G5[Endoplasmic Reticulum] + 5 Sil1p[Endoplasmic Reticulum] + 5 Lhs1p[Endoplasmic Reticulum] + 5 ADP[Endoplasmic Reticulum] + 5 Kar2p[Endoplasmic Reticulum] protein folding	protein folding	Lhs1p;Sil1p
S000001402-F-G5[Endoplasmic Reticulum] + Sar1-GTP[Endoplasmic Reticulum] + Sec23-Sec24C[Cytoplasm] + Bet1p[Endoplasmic Reticulum] + Bos1p[Endoplasmic Reticulum] => S000001402-F-G5-COPII-pbud-cplx[Endoplasmic Reticulum]	COPII (for transmembrane cargo)	Sar1p;Sec23p;Sec24p;Bet1p;Bos1p
S000001402-F-G7orG5-COPII-pbud-cplx[Endoplasmic Reticulum] + Sec13-Sec31C[Cytoplasm] + Sec16p[Endoplasmic Reticulum] + Sed4p[Endoplasmic Reticulum] + Sec17p[Endoplasmic Reticulum] => S000001402-F-G5orG7-COPII[COPII]	COPII(common	Sec13p;Sec31p;Sec16p;Sed4p;Sec17p;Sec22p
S000001402-F-G5-COPII[COPII] + TRAPPIC[COPII] + Ypt1p[COPII] + GTP[COPII] => S000001402-F-G5[Golgi] + sar1-GDP[Cytoplasm] + pi[Cytoplasm] + Sec13-Sec31C[Cytoplasm] + Sec16p[Cytoplasm] + Sec12-Sed24C[Cytoplasm] + Bet3p[Cytoplasm] + Bet5p[Cytoplasm] + Trs20p[Cytoplasm] + Trs23p[Cytoplasm] + Trs31p[Cytoplasm] + Trs33p[Cytoplasm] + Bet1p[Endoplasmic Reticulum] + Bos1p[Endoplasmic Reticulum]	COPII (for transmembrane cargo)	Ypt1p;Uso1p;bug1p;Bet3p;Bet5p;Trs20p;Trs23p;Trs31p;Trs33p
S000001402-misf-G8-cplx[Endoplasmic Reticulum] + 0.1 Hrd1p[Endoplasmic Reticulum] => S000001402-misf-G8-HRDcplx[Endoplasmic Reticulum]	ERADM	Hrd1p
S000001402-misf-G8-HRDcplx[Endoplasmic Reticulum] + 0.1 Ubc7p[Cytoplasm] + 0.1 Cue1p[Cytoplasm] + 0.1 AAAC[Cytoplasm] => S000001402-misf-G8-UBcplx[Endoplasmic Reticulum] + 0.1 Hrd1p[Endoplasmic Reticulum] + 0.1 Usa1p[Endoplasmic Reticulum] + 0.1 Der1p[Endoplasmic Reticulum]	ERADM	Ubc7p; Cue1p;Usa1p; Der1p
S000001402-misf-G8-UBcplx[Endoplasmic Reticulum] + 5 ATP[Cytoplasm] + 5 Ubiquitin[Cytoplasm] => S000001402-misf-G8-Ubiquitin[Cytoplasm] + Ubc7p[Cytoplasm] + 0.1 Cue1p[Cytoplasm] + 0.1 Ubx2p[Endoplasmic Reticulum] + 0.1 Cdc48p[Cytoplasm] + 0.1 Ufd1p[Cytoplasm] + 0.1 Npl4p[Cytoplasm] + 0.1 Usa1p[Endoplasmic Reticulum] + 0.1 Der1p[Endoplasmic Reticulum] + 5 AMP[Cytoplasm] + 5 ppi[Cytoplasm]	ERADM	Ubx2p; Cdc48p; Ufd1p;Npl4p;Ubiquitin
S000001402-misf-G8-Ubiquitin[Cytoplasm] + 0.1 Dsk2p[Cytoplasm] + 0.1 Rad23p[Cytoplasm] + 0.1 Png1p[Cytoplasm] + 5 ATP[Cytoplasm] + 0.1 26sproteosome[Cytoplasm] + 5 H2O[Cytoplasm] => G8[Cytoplasm] + 5 Ubiquitin[Cytoplasm] + 5 ADP[Cytoplasm] + 5 pi[Cytoplasm] + S000001402aa[Cytoplasm]	ERADM	Png1p;26sproteosome
S000001402-G5orG7[Golgi] + GDP-man[Golgi] => S000001402-G9[Golgi] + GDP[Golgi]	Golgi processing	Och1p
S000001402-G9[Golgi] + 5 GDP-man[Golgi] => S000001402-G10[Golgi] + 5 GDP[Golgi]	Golgi processing	Mnn9p;Van1p
S000001402-G10[Golgi] + 40 GDP-man[Golgi] => S000001402-G11[Golgi] + 40 GDP[Golgi]	Golgi processing	Anp1p;Mnn9p;Mnn10p;Mnn11p;Hoc1p
S000001402-G15[Golgi] => S000001402-G16[Golgi] + aminoacid[Golgi]	Golgi processing	Kex1p;Kex2p;Ste13p
S000001402-M1[Golgi] + GTP[Cytoplasm] + clathrinC[Cytoplasm] + Arf1p[Cytoplasm] + EXOC[Cytoplasm] => S000001402-M1[cell membrane] + GDP[Golgi] + 2 Chc1p[Cytoplasm] + Clc1p[Cytoplasm] + Arf1p[Cytoplasm] + Sec3p[Cytoplasm] + Sec5p[Cytoplasm] + Sec6p[Cytoplasm] + Sec8p[Cytoplasm] + Sec10p[Cytoplasm] + Sec15p[Cytoplasm] + Exo70p[Cytoplasm] + Exo84p[Cytoplasm] + Sec4p[Cytoplasm]	LDSV(low density Secretory vesicle)	Arf1p;Sec3p;Sec5p;Sec6p;Sec8p;Sec10p;Sec15p;Exo70p;Exo84p;Sec4p;Chc1p;Clc1p
S000004662[Cytoplasm] + SRPC[Cytoplasm] => S000004662-SRPC[Cytoplasm]	translocation from cytosol to ER (SRP-dependent)	Srp14p;Srp21p;Srp54p;Sec65p;Srp68p;Srp72p
S000004662-SRPC[Cytoplasm] + SRC[Endoplasmic Reticulum] => S000004662-SRPC-SRC[Cytoplasm]	translocation from cytosol to ER (SRP-dependent)	Srp101p;Srp102p
S000004662-SRPC-SRC[Cytoplasm] + 2 GTP[Cytoplasm] + SEC61C[Endoplasmic Reticulum] => S000004662-SRPC-SRC-SEC61C[Cytoplasm]	translocation from cytosol to ER (SRP-dependent)	Sec61p;Sbh1p;Sss1p;Ssh1p
S000004662-SRPC-SRC-SEC61C[Cytoplasm] => S000004662-SEC61C[Cytoplasm] + Srp14p[Cytoplasm] + Srp21p[Cytoplasm] + Srp68p[Cytoplasm] + Sec65p[Cytoplasm] + Srp72p[Cytoplasm] + scR1[Cytoplasm] + Srp54p[Cytoplasm] + Srp51p[Cytoplasm] + Srp52p[Cytoplasm] + 2 GDP[Cytoplasm] + 2 pi[Cytoplasm]	translocation from cytosol to ER (SRP-dependent)
S000004662-SEC61C[Cytoplasm] + SPC[Endoplasmic Reticulum] => S000004662[Endoplasmic Reticulum] + Sec61p[Endoplasmic Reticulum] + Sbh1p[Endoplasmic Reticulum] + Sss1p[Endoplasmic Reticulum] + Sec11p[Endoplasmic Reticulum] + Spc1p[Endoplasmic Reticulum] + Spc2p[Endoplasmic Reticulum] + Spc3p[Endoplasmic Reticulum] + sp[Cytoplasm]	translocation from cytosol to ER (SRP-dependent)	Sec11p;Spc1p;Spc2p;Spc3p
S000004662-SEC61C[Endoplasmic Reticulum] + 13 Dol-pp-GlcNAc(2)man(9)-Glc(3)[Endoplasmic Reticulum] + OSTC[Endoplasmic Reticulum] => S000004662-G1-SEC61C[Endoplasmic Reticulum] + 13 Dol-ppEndoplasmic Reticulum] + Ost1p[Endoplasmic Reticulum] + Ost2p[Endoplasmic Reticulum] + St3p[Endoplasmic Reticulum] + Ost4p[Endoplasmic Reticulum] + Ost5p[Endoplasmic Reticulum] + Ost6p[Endoplasmic Reticulum] + St…	ER N-glycosylation	Stt3p;Ost1p;Wbp1p;OSt3p;Ost6p;Swp1p;Ost2p;Ost5p;Ost4p
S000004662-G1-SEC61C[Endoplasmic Reticulum] => S000004662-G1[Endoplasmic Reticulum] + SEC61C[Endoplasmic Reticulum]	protein folding
S000004662-G1[Endoplasmic Reticulum] => S000004662-G2[Endoplasmic Reticulum] + Glc[Endoplasmic Reticulum]	protein folding	Cwh41p
S000004662-G2[Endoplasmic Reticulum] => S000004662-G3[Endoplasmic Reticulum] + Glc[Endoplasmic Reticulum]	protein folding	Rot2p
S000004662-G3[Endoplasmic Reticulum] => S000004662-G4[Endoplasmic Reticulum] + Glc[Endoplasmic Reticulum]	protein folding	Rot2p
S000004662-G4[Endoplasmic Reticulum] => S000004662-G5[Endoplasmic Reticulum] + man[Endoplasmic Reticulum]	protein folding	Mns1p
S000004662-G5[Endoplasmic Reticulum] + 5 Kar2p[Endoplasmic Reticulum] + 5 ATP[Endoplasmic Reticulum] + 5 Scj1p[Endoplasmic Reticulum] + 5 Jem1p[Endoplasmic Reticulum] + 5 Sec63p[Endoplasmic Reticulum] => S000004662-G5-Kar2ATPcplx[Endoplasmic Reticulum]	protein folding	Kar2p;Scj1p;Jem1p;Sec63p
S000004662-G5-Kar2ATPcplx-[Endoplasmic Reticulum] => S000004662-F-G5-Kar2ADPcplx[Endoplasmic Reticulum] + 5 Scj1p[Endoplasmic Reticulum] + 5 Jem1p[Endoplasmic Reticulum] + 5 pi[Endoplasmic Reticulum] + Sec63p[Endoplasmic Reticulum]	protein folding
S000004662-F-G5-Kar2ADPcplx[Endoplasmic Reticulum] + 5 Sil1p[Endoplasmic Reticulum] + 5 Lhs1p[Endoplasmic Reticulum] + 5 ATP[Endoplasmic Reticulum] => S000004662-F-G5[Endoplasmic Reticulum] + 5 Sil1p[Endoplasmic Reticulum] + 5 Lhs1p[Endoplasmic Reticulum] + 5 ADP[Endoplasmic Reticulum] + 5 Kar2p[Endoplasmic Reticulum] protein folding	protein folding	Lhs1p;Sil1p
S000004662-F-G5[Endoplasmic Reticulum] + Sar1-GTP[Endoplasmic Reticulum] + Sec23-Sec24C[Cytoplasm] + Bet1p[Endoplasmic Reticulum] + Bos1p[Endoplasmic Reticulum] => S000004662-F-G5-COPII-pbud-cplx[Endoplasmic Reticulum]	COPII (for transmembrane cargo)	Sar1p;Sec23p;Sec24p;Bet1p;Bos1p
S000004662-F-G7orG5-COPII-pbud-cplx[Endoplasmic Reticulum] + Sec13-Sec31C[Cytoplasm] + Sec16p[Endoplasmic Reticulum] + Sed4p[Endoplasmic Reticulum] + Sec17p[Endoplasmic Reticulum] => S000004662-F-G5orG7-COPII[COPII]	COPII(common	Sec13p;Sec31p;Sec16p;Sed4p;Sec17p;Sec22p
S000004662-F-G5-COPII[COPII] + TRAPPIC[COPII] + Ypt1p[COPII] + GTP[COPII] => S000004662-F-G5[Golgi] + sar1-GDP[Cytoplasm] + pi[Cytoplasm] + Sec13-Sec31C[Cytoplasm] + Sec16p[Cytoplasm] + Sec12-Sed24C[Cytoplasm] + Bet3p[Cytoplasm] + Bet5p[Cytoplasm] + Trs20p[Cytoplasm] + Trs23p[Cytoplasm] + Trs31p[Cytoplasm] + Trs33p[Cytoplasm] + Bet1p[Endoplasmic Reticulum] + Bos1p[Endoplasmic Reticulum]	COPII (for transmembrane cargo)	Ypt1p;Uso1p;bug1p;Bet3p;Bet5p;Trs20p;Trs23p;Trs31p;Trs33p
S000004662-misf-G8-cplx[Endoplasmic Reticulum] + 0.1 Hrd1p[Endoplasmic Reticulum] => S000004662-misf-G8-HRDcplx[Endoplasmic Reticulum]	ERADM	Hrd1p
S000004662-misf-G8-HRDcplx[Endoplasmic Reticulum] + 0.1 Ubc7p[Cytoplasm] + 0.1 Cue1p[Cytoplasm] + 0.1 AAAC[Cytoplasm] => S000004662-misf-G8-UBcplx[Endoplasmic Reticulum] + 0.1 Hrd1p[Endoplasmic Reticulum] + 0.1 Usa1p[Endoplasmic Reticulum] + 0.1 Der1p[Endoplasmic Reticulum]	ERADM	Ubc7p; Cue1p;Usa1p; Der1p
S000004662-misf-G8-UBcplx[Endoplasmic Reticulum] + 5 ATP[Cytoplasm] + 5 Ubiquitin[Cytoplasm] => S000004662-misf-G8-Ubiquitin[Cytoplasm] + Ubc7p[Cytoplasm] + 0.1 Cue1p[Cytoplasm] + 0.1 Ubx2p[Endoplasmic Reticulum] + 0.1 Cdc48p[Cytoplasm] + 0.1 Ufd1p[Cytoplasm] + 0.1 Npl4p[Cytoplasm] + 0.1 Usa1p[Endoplasmic Reticulum] + 0.1 Der1p[Endoplasmic Reticulum] + 5 AMP[Cytoplasm] + 5 ppi[Cytoplasm]	ERADM	Ubx2p; Cdc48p; Ufd1p;Npl4p;Ubiquitin
S000004662-misf-G8-Ubiquitin[Cytoplasm] + 0.1 Dsk2p[Cytoplasm] + 0.1 Rad23p[Cytoplasm] + 0.1 Png1p[Cytoplasm] + 5 ATP[Cytoplasm] + 0.1 26sproteosome[Cytoplasm] + 5 H2O[Cytoplasm] => G8[Cytoplasm] + 5 Ubiquitin[Cytoplasm] + 5 ADP[Cytoplasm] + 5 pi[Cytoplasm] + S000004662aa[Cytoplasm]	ERADM	Png1p;26sproteosome
S000004662-G5orG7[Golgi] + GDP-man[Golgi] => S000004662-G9[Golgi] + GDP[Golgi]	Golgi processing	Och1p
S000004662-G9[Golgi] + 5 GDP-man[Golgi] => S000004662-G10[Golgi] + 5 GDP[Golgi]	Golgi processing	Mnn9p;Van1p
S000004662-G10[Golgi] + 40 GDP-man[Golgi] => S000004662-G11[Golgi] + 40 GDP[Golgi]	Golgi processing	Anp1p;Mnn9p;Mnn10p;Mnn11p;Hoc1p
S000004662-G15[Golgi] => S000004662-G16[Golgi] + aminoacid[Golgi]	Golgi processing	Kex1p;Kex2p;Ste13p
S000004662-M1[Golgi] + GTP[Cytoplasm] + clathrinC[Cytoplasm] + Arf1p[Cytoplasm] + EXOC[Cytoplasm] => S000004662-M1[cell membrane] + GDP[Golgi] + 2 Chc1p[Cytoplasm] + Clc1p[Cytoplasm] + Arf1p[Cytoplasm] + Sec3p[Cytoplasm] + Sec5p[Cytoplasm] + Sec6p[Cytoplasm] + Sec8p[Cytoplasm] + Sec10p[Cytoplasm] + Sec15p[Cytoplasm] + Exo70p[Cytoplasm] + Exo84p[Cytoplasm] + Sec4p[Cytoplasm]	LDSV(low density Secretory vesicle)	Arf1p;Sec3p;Sec5p;Sec6p;Sec8p;Sec10p;Sec15p;Exo70p;Exo84p;Sec4p;Chc1p;Clc1p
S000004324[Cytoplasm] + SRPC[Cytoplasm] => S000004324-SRPC[Cytoplasm]	translocation from cytosol to ER (SRP-dependent)	Srp14p;Srp21p;Srp54p;Sec65p;Srp68p;Srp72p
S000004324-SRPC[Cytoplasm] + SRC[Endoplasmic Reticulum] => S000004324-SRPC-SRC[Cytoplasm]	translocation from cytosol to ER (SRP-dependent)	Srp101p;Srp102p
S000004324-SRPC-SRC[Cytoplasm] + 2 GTP[Cytoplasm] + SEC61C[Endoplasmic Reticulum] => S000004324-SRPC-SRC-SEC61C[Cytoplasm]	translocation from cytosol to ER (SRP-dependent)	Sec61p;Sbh1p;Sss1p;Ssh1p
S000004324-SRPC-SRC-SEC61C[Cytoplasm] => S000004324-SEC61C[Cytoplasm] + Srp14p[Cytoplasm] + Srp21p[Cytoplasm] + Srp68p[Cytoplasm] + Sec65p[Cytoplasm] + Srp72p[Cytoplasm] + scR1[Cytoplasm] + Srp54p[Cytoplasm] + Srp51p[Cytoplasm] + Srp52p[Cytoplasm] + 2 GDP[Cytoplasm] + 2 pi[Cytoplasm]	translocation from cytosol to ER (SRP-dependent)
[truncated: 10,030 more rows]
