# Supplementary material for: Genome-Scale Modeling of the Protein Secretory Machinery in Yeast
Source: PLoS One. 2013 May 7;8(5):e63284. doi: 10.1371/journal.pone.0063284 (PMC3646752; doi:10.1371/journal.pone.0063284)
Supplement: Table S10 — Yeast SP+ secretory proteins GO enrichment. (XLSX) [file pone.0063284.s014.xlsx]

## Sheet: Sheet1
Table S10-Yeast conventional secretory protein GO enrichment analysis
P-value cutoff	0.01
Calculate FDR	Table s10-Yes
Regulation links followed	Yes
Bonferroni correction	Yes
Annotation file	gene_association.sgd
Evidence codes used	IEA (43100), ISM (943), IGI (3193), IEP (126), IBA (227), NAS (695), IPI (2653), ND (3950), IC (682), ISO (3), ISS (2338), ISA (169), IDA (17109), IMP (10423), TAS (2065)
GOID	TERM	CORRECTED_PVALUE	UNCORRECTED_PVALUE	NUM_LIST_ANNOTATIONS	LIST_SIZE	TOTAL_NUM_ANNOTATIONS	POPULATION_SIZE	FDR_RATE	EXPECTED_FALSE_POSITIVES	ANNOTATED_GENES
GO:0071554	cell wall organization or biogenesis	9.05514086690816e-50	1.825633239296e-52	76	260	246	7166	0.00%	0.00	S000003421, S000003511, S000004276, S000002891, S000004851, S000003675, S000000553, S000005515, S000001769, S000003255, S000003375, S000001186, S000000271, S000004100, S000004828, S000003695, S000006142, S000006429, S000001121, S000004111, S000000505, S000001174, S000001579, S000002462, S000002828, S000004184, S000001808, S000005492, S000001529, S000000049, S000001020, S000004974, S000000766, S00…
GO:0070882	cellular cell wall organization or biogenesis	7.46734711205086e-49	1.50551353065542e-51	75	260	244	7166	0.00%	0.00	S000003421, S000003511, S000004276, S000002891, S000004851, S000003675, S000000553, S000005515, S000001769, S000003255, S000003375, S000001186, S000000271, S000004100, S000004828, S000003695, S000006142, S000006429, S000001121, S000004111, S000000505, S000001174, S000001579, S000002462, S000002828, S000004184, S000001808, S000005492, S000001529, S000000049, S000001020, S000004974, S000000766, S00…
GO:0007047	cellular cell wall organization	4.40613866409109e-40	8.88334408082881e-43	63	260	206	7166	0.00%	0.00	S000004974, S000000766, S000005716, S000004335, S000003421, S000003511, S000003710, S000004276, S000001143, S000005266, S000004921, S000004851, S000005863, S000000282, S000002996, S000006363, S000001347, S000000553, S000001647, S000004027, S000005010, S000005515, S000003694, S000000685, S000001646, S000003255, S000003375, S000001186, S000002484, S000000271, S000001956, S000004100, S000004828, S00…
GO:0045229	external encapsulating structure organization	4.40613866409109e-40	8.88334408082881e-43	63	260	206	7166	0.00%	0.00	S000004974, S000000766, S000005716, S000004335, S000003421, S000003511, S000003710, S000004276, S000001143, S000005266, S000004921, S000004851, S000005863, S000000282, S000002996, S000006363, S000001347, S000000553, S000001647, S000004027, S000005010, S000005515, S000003694, S000000685, S000001646, S000003255, S000003375, S000001186, S000002484, S000000271, S000001956, S000004100, S000004828, S00…
GO:0071555	cell wall organization	4.40613866409109e-40	8.88334408082881e-43	63	260	206	7166	0.00%	0.00	S000004974, S000000766, S000005716, S000004335, S000003421, S000003511, S000003710, S000004276, S000001143, S000005266, S000004921, S000004851, S000005863, S000000282, S000002996, S000006363, S000001347, S000000553, S000001647, S000004027, S000005010, S000005515, S000003694, S000000685, S000001646, S000003255, S000003375, S000001186, S000002484, S000000271, S000001956, S000004100, S000004828, S00…
GO:0071852	fungal-type cell wall organization or biogenesis	1.16540099939017e-28	2.34959878909309e-31	51	260	190	7166	0.00%	0.00	S000004974, S000000766, S000004335, S000003421, S000003710, S000001143, S000005266, S000004851, S000000282, S000006363, S000001347, S000000553, S000001647, S000005515, S000003694, S000001646, S000003255, S000003375, S000002484, S000000271, S000001956, S000004100, S000005227, S000003695, S000006142, S000006429, S000005534, S000001121, S000004111, S000001174, S000004110, S000004324, S000002995, S00…
GO:0009100	glycoprotein metabolic process	2.8887988192471e-28	5.82419116783689e-31	35	260	76	7166	0.00%	0.00	S000004974, S000004583, S000003539, S000000803, S000000728, S000002629, S000002891, S000003675, S000005863, S000005847, S000001276, S000004757, S000003892, S000001347, S000004010, S000001769, S000005971, S000003836, S000001684, S000003226, S000003006, S000005625, S000000219, S000002653, S000005611, S000002995, S000000768, S000000314, S000005342, S000000403, S000000762, S000003722, S000004993, S00…
GO:0009101	glycoprotein biosynthetic process	2.8887988192471e-28	5.82419116783689e-31	35	260	76	7166	0.00%	0.00	S000004974, S000004583, S000003539, S000000803, S000000728, S000002629, S000002891, S000003675, S000005863, S000005847, S000001276, S000004757, S000003892, S000001347, S000004010, S000001769, S000005971, S000003836, S000001684, S000003226, S000003006, S000005625, S000000219, S000002653, S000005611, S000002995, S000000768, S000000314, S000005342, S000000403, S000000762, S000003722, S000004993, S00…
GO:0006486	protein glycosylation	1.07139438963024e-26	2.16006933393194e-29	33	260	71	7166	0.00%	0.00	S000004974, S000004583, S000003539, S000000803, S000000728, S000002629, S000002891, S000003675, S000005863, S000005847, S000001276, S000004757, S000003892, S000001347, S000001769, S000005971, S000001684, S000003226, S000003006, S000005625, S000000219, S000002653, S000005611, S000002995, S000000768, S000000314, S000005342, S000000403, S000000762, S000003722, S000004993, S000005974, S000006148
GO:0043413	macromolecule glycosylation	1.07139438963024e-26	2.16006933393194e-29	33	260	71	7166	0.00%	0.00	S000004974, S000004583, S000003539, S000000803, S000000728, S000002629, S000002891, S000003675, S000005863, S000005847, S000001276, S000004757, S000003892, S000001347, S000001769, S000005971, S000001684, S000003226, S000003006, S000005625, S000000219, S000002653, S000005611, S000002995, S000000768, S000000314, S000005342, S000000403, S000000762, S000003722, S000004993, S000005974, S000006148
GO:0070085	glycosylation	1.91661349605355e-26	3.86414011301119e-29	33	260	72	7166	0.00%	0.00	S000004974, S000004583, S000003539, S000000803, S000000728, S000002629, S000002891, S000003675, S000005863, S000005847, S000001276, S000004757, S000003892, S000001347, S000001769, S000005971, S000001684, S000003226, S000003006, S000005625, S000000219, S000002653, S000005611, S000002995, S000000768, S000000314, S000005342, S000000403, S000000762, S000003722, S000004993, S000005974, S000006148
GO:0031505	fungal-type cell wall organization	3.28467044950321e-26	6.62231945464357e-29	41	260	126	7166	0.00%	0.00	S000004974, S000000766, S000003421, S000003710, S000005266, S000000282, S000006363, S000001347, S000000553, S000001647, S000005515, S000003694, S000001646, S000003255, S000003375, S000002484, S000000271, S000001956, S000004100, S000005227, S000003695, S000006429, S000005534, S000001121, S000004111, S000004110, S000001174, S000004324, S000001579, S000002462, S000004291, S000002828, S000004924, S00…
GO:0006487	protein N-linked glycosylation	3.24895491098911e-23	6.55031232054257e-26	26	260	47	7166	0.00%	0.00	S000004974, S000003006, S000005625, S000004583, S000003539, S000000803, S000002653, S000000728, S000002629, S000002891, S000003675, S000005847, S000005611, S000002995, S000004757, S000000314, S000003892, S000001347, S000000403, S000000762, S000001769, S000004993, S000005971, S000005974, S000006148, S000001684
GO:0005975	carbohydrate metabolic process	3.75804186620555e-20	7.57669731089828e-23	58	260	365	7166	0.00%	0.00	S000004974, S000004583, S000003539, S000000766, S000000803, S000005716, S000004335, S000003421, S000003511, S000000728, S000002629, S000003710, S000004276, S000002891, S000004921, S000004851, S000003675, S000005863, S000005847, S000001276, S000002996, S000004757, S000002779, S000006363, S000003892, S000001347, S000001769, S000005971, S000003375, S000003836, S000001684, S000003226, S000003006, S00…
GO:0044262	cellular carbohydrate metabolic process	1.01874603268269e-09	2.05392345298929e-12	41	260	331	7166	0.00%	0.00	S000004974, S000004583, S000003539, S000000803, S000000728, S000002629, S000003710, S000002891, S000003675, S000005863, S000005847, S000001276, S000004757, S000006363, S000003892, S000001347, S000001769, S000005971, S000003375, S000003836, S000001684, S000003226, S000003006, S000005625, S000000219, S000002653, S000002207, S000001121, S000005611, S000002995, S000000768, S000004291, S000000314, S00…
GO:0042546	cell wall biogenesis	3.59311915979947e-09	7.24419185443442e-12	21	260	92	7166	0.00%	0.00	S000005625, S000002653, S000006142, S000004335, S000003710, S000002207, S000001143, S000002891, S000005104, S000004851, S000003675, S000002995, S000000433, S000000553, S000004010, S000005492, S000002930, S000001769, S000001529, S000003836, S000000049
GO:0006457	protein folding	1.44005733172553e-06	2.90334139460793e-09	20	260	113	7166	0.00%	0.00	S000002927, S000006241, S000006142, S000001289, S000001278, S000001099, S000001937, S000005448, S000000548, S000000550, S000004827, S000003609, S000004511, S000004813, S000002712, S000000054, S000005680, S000000665, S000005814, S000000049
GO:0070972	protein localization in endoplasmic reticulum	8.40160747190977e-06	1.69387247417536e-08	12	260	42	7166	0.00%	0.00	S000001637, S000004056, S000001461, S000001556, S000003168, S000003571, S000004519, S000005391, S000001267, S000000375, S000003770, S000001020
GO:0006826	iron ion transport	2.4644692915611e-05	4.96868808782479e-08	9	260	23	7166	0.00%	0.00	S000005908, S000001703, S000005343, S000005909, S000001853, S000005910, S000004204, S000004662, S000002942
GO:0000032	cell wall mannoprotein biosynthetic process	2.56937741169921e-05	5.18019639455485e-08	7	260	12	7166	0.00%	0.00	S000004010, S000001769, S000002891, S000005625, S000003675, S000002653, S000003836
GO:0006056	mannoprotein metabolic process	2.56937741169921e-05	5.18019639455485e-08	7	260	12	7166	0.00%	0.00	S000004010, S000001769, S000002891, S000005625, S000003675, S000002653, S000003836
GO:0006057	mannoprotein biosynthetic process	2.56937741169921e-05	5.18019639455485e-08	7	260	12	7166	0.00%	0.00	S000004010, S000001769, S000002891, S000005625, S000003675, S000002653, S000003836
GO:0031506	cell wall glycoprotein biosynthetic process	2.56937741169921e-05	5.18019639455485e-08	7	260	12	7166	0.00%	0.00	S000004010, S000001769, S000002891, S000005625, S000003675, S000002653, S000003836
GO:0044036	cell wall macromolecule metabolic process	3.73336382063026e-05	7.52694318675455e-08	10	260	31	7166	0.00%	0.00	S000005625, S000000766, S000002653, S000003421, S000004010, S000002891, S000001769, S000003836, S000003675, S000005350
GO:0005976	polysaccharide metabolic process	0.000155429463969026	3.13365854776262e-07	14	260	74	7166	0.00%	0.00	S000004291, S000002779, S000006363, S000002828, S000000766, S000002653, S000003421, S000002629, S000003710, S000004276, S000002207, S000003375, S000003836, S000005863
GO:0045047	protein targeting to ER	0.000182187813808005	3.67314140741947e-07	10	260	36	7166	0.00%	0.00	S000001637, S000004056, S000001461, S000001556, S000003571, S000004519, S000005391, S000000375, S000001020, S000003770
GO:0072599	establishment of protein localization in endoplasmic reticulum	0.000182187813808005	3.67314140741947e-07	10	260	36	7166	0.00%	0.00	S000001637, S000004056, S000001461, S000001556, S000003571, S000004519, S000005391, S000000375, S000001020, S000003770
GO:0055080	cation homeostasis	0.000212345226895842	4.28115376806134e-07	18	260	124	7166	0.00%	0.00	S000005908, S000005343, S000001956, S000003974, S000000915, S000001853, S000005910, S000000640, S000002942, S000004662, S000001703, S000002864, S000005909, S000000240, S000003595, S000004073, S000002514, S000004204
GO:0006493	protein O-linked glycosylation	0.00032741887370237	6.60118696980584e-07	7	260	16	7166	0.00%	0.00	S000001276, S000003226, S000002891, S000005625, S000000803, S000005342, S000001684
GO:0033212	iron assimilation	0.000423641522010186	8.54115971794729e-07	6	260	11	7166	0.00%	0.00	S000005908, S000005343, S000005910, S000005909, S000002942, S000004662
GO:0000128	flocculation	0.000594064821054852	1.19771133277188e-06	5	260	7	7166	0.00%	0.00	S000001458, S000001810, S000001254, S000000084, S000000059
GO:0030433	ER-associated protein catabolic process	0.000612053332785601	1.23397849351936e-06	11	260	50	7166	0.00%	0.00	S000004827, S000000557, S000003609, S000004047, S000003892, S000003571, S000002464, S000004197, S000001247, S000000054, S000001267
GO:0050801	ion homeostasis	0.000852891387209908	1.71953908711675e-06	18	260	136	7166	0.00%	0.00	S000005908, S000005343, S000001956, S000003974, S000000915, S000001853, S000005910, S000000640, S000002942, S000004662, S000001703, S000002864, S000005909, S000000240, S000003595, S000004073, S000002514, S000004204
GO:0051273	beta-glucan metabolic process	0.00147956429936472	2.98299253904177e-06	6	260	13	7166	0.00%	0.00	S000003710, S000002207, S000006363, S000002828, S000005863, S000003375
GO:0048878	chemical homeostasis	0.00239985558955611	4.83841852733086e-06	18	260	146	7166	0.00%	0.00	S000005908, S000005343, S000001956, S000003974, S000000915, S000001853, S000005910, S000000640, S000002942, S000004662, S000001703, S000002864, S000005909, S000000240, S000003595, S000004073, S000002514, S000004204
GO:0051604	protein maturation	0.00260714689246113	5.25634454125227e-06	10	260	47	7166	0.00%	0.00	S000005182, S000004056, S000001461, S000000557, S000003171, S000000664, S000004519, S000005745, S000004110, S000003770
GO:0000041	transition metal ion transport	0.00318931431855371	6.43006919063248e-06	10	260	48	7166	0.00%	0.00	S000005908, S000001703, S000005343, S000005909, S000003974, S000001853, S000005910, S000004204, S000004662, S000002942
GO:0006077	(1->6)-beta-D-glucan metabolic process	0.00335637358997923	6.76688223786136e-06	5	260	9	7166	0.00%	0.00	S000003710, S000002207, S000006363, S000005863, S000003375
GO:0015688	iron chelate transport	0.00335637358997923	6.76688223786136e-06	5	260	9	7166	0.00%	0.00	S000005908, S000005343, S000005910, S000005909, S000002942
GO:0015891	siderophore transport	0.00335637358997923	6.76688223786136e-06	5	260	9	7166	0.00%	0.00	S000005908, S000005343, S000005910, S000005909, S000002942
GO:0033214	iron assimilation by chelation and transport	0.00335637358997923	6.76688223786136e-06	5	260	9	7166	0.00%	0.00	S000005908, S000005343, S000005910, S000005909, S000002942
GO:0019725	cellular homeostasis	0.00360467382957252	7.26748755962201e-06	19	260	165	7166	0.00%	0.00	S000005908, S000005343, S000003974, S000000915, S000005910, S000000640, S000002942, S000004662, S000005448, S000000548, S000005909, S000002864, S000000240, S000003595, S000004073, S000002514, S000002168, S000001267, S000005814
GO:0006491	N-glycan processing	0.00408257589381634	8.23099978592003e-06	4	260	5	7166	0.00%	0.00	S000002891, S000005625, S000000803, S000002653
GO:0016337	cell-cell adhesion	0.00408257589381634	8.23099978592003e-06	4	260	5	7166	0.00%	0.00	S000001458, S000004100, S000003764, S000005327
GO:0055072	iron ion homeostasis	0.00469781481204168	9.47140083072919e-06	10	260	50	7166	0.00%	0.00	S000005908, S000001703, S000005343, S000005909, S000003974, S000001853, S000005910, S000004204, S000004662, S000002942
GO:0006508	proteolysis	0.00564049369901935	1.13719631028616e-05	29	260	337	7166	0.00%	0.00	S000002739, S000004781, S000001461, S000000557, S000004047, S000004912, S000003171, S000004197, S000005745, S000004111, S000005782, S000001174, S000004110, S000005182, S000001607, S000006097, S000004827, S000003609, S000003571, S000003892, S000002464, S000000786, S000006075, S000001247, S000000054, S000002551, S000001277, S000001267, S000000490
GO:0007155	cell adhesion	0.00651415732130425	1.31333816961779e-05	5	260	10	7166	0.00%	0.00	S000001458, S000000685, S000004100, S000003764, S000005327
GO:0022610	biological adhesion	0.00651415732130425	1.31333816961779e-05	5	260	10	7166	0.00%	0.00	S000001458, S000000685, S000004100, S000003764, S000005327
