# Supplementary material for: Genome-Scale Modeling of the Protein Secretory Machinery in Yeast
Source: PLoS One. 2013 May 7;8(5):e63284. doi: 10.1371/journal.pone.0063284 (PMC3646752; doi:10.1371/journal.pone.0063284)
Supplement: Table S12 — Human SP+ secretory proteins GO enrichment analysis. (XLSX) [file pone.0063284.s016.xlsx]

## Sheet: Sheet2
Table S12-Human conventional secretory protien GO enrichment analysis
P-value cutoff	0.01
Calculate FDR	Yes
Regulation links followed	Yes
Bonferroni correction	Yes
Annotation file	gene_association.goa_human			52.205
Evidence codes used	IEA (197012), EXP (174), IEP (724), IGI (443), NAS (8687), IBA (2852), IPI (18922), ND (1857), IC (1110), ISS (10913), IDA (41605), IMP (7691), RCA (42), TAS (56506)
GOID	TERM	CORRECTED_PVALUE	UNCORRECTED_PVALUE	NUM_LIST_ANNOTATIONS	LIST_SIZE	TOTAL_NUM_ANNOTATIONS	POPULATION_SIZE	FDR_RATE	EXPECTED_FALSE_POSITIVES	ANNOTATED_GENES
GO:XXXXXXX	unannotated	0	0	2557	4898	8434	46025	0	0	Q8NC54, Q8WW62, P43238, Q8NES8, Q8J1L4, Q6P5S2, A4H236, Q86Z23, P13829, P40198, C6EVG1, Q05109, P09056, Q95LV1, Q95LI0, Q6UW10, Q9H5Y7, Q86WI0, P0C0I7, Q9Z0G4, Q95182, Q8N135, P22934, Q8AWI5, Q9GK16, P08120, Q96PB1, Q8CG19, B1B5J0, Q4L979, Q9WU03, O75264, Q96B86, P97391, P52584, P30504, P68799, Q99V46, P04725, Q5DRF5, Q86Y30, Q9EPV9, Q9KI13, Q69557, Q0V8T7, P30481, Q9Y6I9, A4H217, P61262, Q7JGM1,…
GO:0005102	receptor binding	7.05525e-140	9.62517e-143	566	4898	1729	46025	0	0	P02656, Q99616, O15130, Q5ZPR3, P29460, P01258, P01215, P02778, Q16627, P05000, P02675, Q9NPF7, P55085, P05107, Q9NQ30, P55774, P01574, O94813, P01019, Q9P0K1, P12643, P29323, P18509, Q16787, Q8N729, P09681, P05305, Q9Y258, O60258, P22105, O95841, Q96RP3, P81277, Q9P0W0, P25116, P02647, Q9P0M4, Q9NR61, Q8WYK1, P41159, O75077, P20809, P14778, Q9H293, P18084, P20366, P07093, Q13316, P03950, P01570,…
GO:0005125	cytokine activity	1.64377e-84	2.24252e-87	158	4898	256	46025	0	0	Q99616, P01563, O15444, P29460, O95972, P09544, O60565, P78556, P02778, Q16627, P05000, Q9NPF7, Q8IZI9, P55774, P15248, P01574, P12643, P05014, O95393, P02776, P16619, Q9UHD0, P80098, Q99988, P05305, Q9Y258, Q9UK05, O00626, P08700, P13497, Q14213, P01566, Q9P0W0, P09529, P22004, O75462, Q9P0M4, Q96PD4, P05112, Q00604, P20809, Q9H293, O95813, P02775, P55773, Q969D9, P61812, P05231, P47992, P12645,…
GO:0005179	hormone activity	1.02853e-58	1.40318e-61	105	4898	162	46025	0	0	O15130, O15444, P14138, P01266, P01241, P01258, P02766, P01215, Q9UBU3, P01282, P23582, P01185, Q15848, P01236, P04808, Q14641, P01298, Q9UBC7, P04090, P01178, P12872, P01019, Q5JQD4, P01275, P58166, P55089, P18509, P05060, Q13519, Q7Z4H4, Q9BQ08, P01350, Q9ULZ1, P05019, P09681, P05305, P01160, P01243, P01222, P01308, P20396, P55103, Q02747, P40225, O43555, P10092, P05111, P07492, Q96RP3, P81277,…
GO:0005539	glycosaminoglycan binding	4.73931e-58	6.46564e-61	129	4898	242	46025	0	0	P01042, P05154, Q8WWQ8, P39877, O94813, Q9BQB4, P13611, P02776, P08294, P07585, P04004, P80098, Q76M96, P07996, Q9BZV3, Q9NY15, P11150, P14151, Q6Q788, P22105, P16109, Q96LB9, Q14520, Q8TB73, P01008, P16112, P02751, P16070, P98066, P05067, P21781, P30533, O75594, P11362, Q53RD9, P55773, P07093, Q8N441, P03950, P02649, Q96PD5, Q9UKZ9, P80162, O14594, Q14956, Q8TAT2, P49746, Q9H0B8, O15520, Q9Y5Y7,…
GO:0001871	pattern binding	7.9037e-57	1.07827e-59	139	4898	283	46025	0	0	P01042, P05154, Q9GZM7, Q8WWQ8, P39877, O94813, Q9BQB4, P13611, P02776, P08294, P07585, P04004, P80098, Q76M96, Q13822, P07996, Q9BZV3, Q9NY15, P11150, P14151, Q6Q788, P22105, P16109, Q96LB9, Q14520, Q8TB73, P01008, P16112, P02751, P16070, P98066, P05067, P21781, P30533, O75594, P11362, Q53RD9, P55773, P07093, Q8N441, P03950, P02649, Q96PD5, Q9UKZ9, P80162, O14594, P21128, Q14956, Q8TAT2, P49746,…
GO:0030247	polysaccharide binding	7.9037e-57	1.07827e-59	139	4898	283	46025	0	0	P01042, P05154, Q9GZM7, Q8WWQ8, P39877, O94813, Q9BQB4, P13611, P02776, P08294, P07585, P04004, P80098, Q76M96, Q13822, P07996, Q9BZV3, Q9NY15, P11150, P14151, Q6Q788, P22105, P16109, Q96LB9, Q14520, Q8TB73, P01008, P16112, P02751, P16070, P98066, P05067, P21781, P30533, O75594, P11362, Q53RD9, P55773, P07093, Q8N441, P03950, P02649, Q96PD5, Q9UKZ9, P80162, O14594, P21128, Q14956, Q8TAT2, P49746,…
GO:0004872	receptor activity	3.61709e-55	4.93464e-58	616	4898	3062	46025	0	0	Q9NS98, P31785, Q9NQ25, O95944, P29460, Q04771, Q14563, Q92956, Q9NYQ7, P22794, Q9HBG7, P55085, P02724, P05107, O75578, Q969Z4, Q8TCU5, O75197, Q9P0K1, P29323, Q99795, Q6UXL0, O00451, P20138, Q99523, P30460, O14522, Q9NYZ4, Q99466, Q9NY15, O15399, Q96K78, Q16620, Q9NS68, P25116, Q13291, P07949, P12319, Q13214, O95256, Q86SU0, P14778, Q5T6X5, P18084, Q9UKX5, O75787, O75509, P11362, Q8N441, Q9Y561,…
GO:0008083	growth factor activity	4.1024e-54	5.59673e-57	128	4898	253	46025	0	0	Q9UBD9, P01133, P29460, O95972, P13232, P01241, P12034, P01137, Q9UMX5, Q9NZK5, P60568, Q9NQ30, P15248, P01019, P12643, P09341, P58166, O95393, Q7Z5Y6, Q9NSA1, P20783, P49767, Q9Y5C1, O60542, P09919, P55075, O43915, Q5T4W7, P05019, Q6ZMJ4, Q99988, Q99748, O75610, Q9UK05, Q9HCT0, P01127, P08700, P10767, P13497, P34820, P49763, P43026, P55103, P40225, Q9NPF0, O60258, P10600, P05111, Q9NP70, Q7Z4P5,…
GO:0008201	heparin binding	1.07054e-51	1.46048e-54	98	4898	159	46025	0	0	P10720, P13500, O94769, P01042, P13501, Q7Z7G0, O00622, Q9NZK5, P05154, P51888, P39877, O94813, Q9UP79, P08519, Q9BQB4, P02776, P08294, Q9BXY4, Q12841, P22455, P08246, P04004, P80098, Q76M96, Q13753, P07996, O15072, Q9BZV3, P02788, P11150, P49763, P14151, Q6Q788, P22105, P16109, P80075, Q8TB73, P01008, P02751, P51693, P21802, Q06481, P05067, P19835, Q03167, P21781, P30533, Q8WWY8, Q2MKA7, P11362,…
GO:0030246	carbohydrate binding	6.5248e-48	8.9015e-51	222	4898	716	46025	0	0	P10323, Q06141, Q5H8C1, A6NMB1, P01042, P05154, Q9GZM7, Q8WWQ8, P39877, P48304, O94813, Q6UXS0, P98161, Q9NPY3, Q8IX05, Q9BQB4, Q9H0V9, P13611, Q14697, P20916, P02776, Q9UBG0, P08294, P07585, P20138, Q8IWL1, Q8IUL8, P04004, P80098, Q8WWA0, Q76M96, Q13822, P07996, Q9NYZ4, Q15485, Q7Z442, Q9BZV3, Q9NY15, P11150, Q9Y336, O95490, P14151, A5D8T8, Q6Q788, O00462, P22105, O15389, P16109, Q96LB9, Q14520,…
GO:0005126	cytokine receptor binding	6.56324e-44	8.95395e-47	123	4898	278	46025	0	0	Q9UBD9, O60602, P10720, Q99616, P01563, O15444, P29460, P13500, P17813, P13232, P01241, Q13145, O60565, P78556, P01137, P78536, P02778, Q16627, P05000, P01236, Q9NPF7, P13501, P60568, P22362, P19876, Q8NEV9, P55774, P42830, P15248, P01574, P09341, P01567, P05014, P36897, P02776, P20783, P16619, O00175, P49767, Q8IU54, O00585, P09919, O43915, P80098, Q6ZMJ4, Q9NYY1, Q9Y258, O75610, O00626, P08700,…
GO:0001664	G-protein coupled receptor binding	1.20988e-41	1.65059e-44	108	4898	229	46025	0	0	P10720, Q99616, Q9UBV4, O15444, P13500, Q9GZT5, P01258, O14905, P09544, Q13145, Q9UBU3, P78556, P01185, P02778, Q16627, P13501, Q9H1J7, Q9NZK5, P60568, P22362, P19876, P01298, P01178, P55774, P42830, P42127, P01019, Q13224, O60894, P01275, P09341, P02776, P55089, P41594, P16619, O00175, O00585, P56704, Q8N729, P80098, P05305, Q9Y258, O00626, O96014, P51671, P19875, Q96RP3, P81277, O00230, Q9Y6F9,…
GO:0019838	growth factor binding	5.80225e-33	7.91576e-36	81	4898	163	46025	0	0	P31785, Q13873, P35052, P17813, Q04771, P02461, P14784, P01589, O00622, Q9NQ30, Q9BYJ0, P36897, O95388, P20783, P12109, P22455, Q99523, Q92743, P22607, Q99650, Q96I82, Q8WX77, P10912, P07996, Q16288, P01127, P24592, P10600, Q16620, P37173, O76076, Q12891, Q14766, P21802, P18065, P08833, P24593, P36896, O95389, Q03167, P83110, P16234, P08123, Q02643, P02462, P83105, P27037, P11362, P29279, Q8N441,…
GO:0008009	chemokine activity	1.04183e-30	1.42132e-33	46	4898	59	46025	0	0	P10720, Q99616, O15444, P13500, P02775, P78556, P02778, Q16627, P55773, P13501, P01031, Q07325, O43927, P22362, P19876, P13236, P47992, P55774, P42830, P09341, P80162, P02776, P16619, O00175, Q8NHW4, O00585, P48061, P80098, Q9Y4X3, Q9Y258, Q16663, O00626, P78423, Q99731, P51671, O14625, P19875, P10145, P80075, O95715, Q92583, Q9UBD3, P10147, Q9NRJ3, O15467, Q9H2A7
GO:0005201	extracellular matrix structural constituent	1.19369e-30	1.6285e-33	75	4898	150	46025	0	0	P13942, P02461, P20849, P01730, P02808, Q9UBM4, Q16363, Q99715, P25067, P23142, P36222, P51888, P11047, Q01955, Q9GZM7, Q14993, Q9NRM1, P35555, Q8IZC6, Q9NZW4, P56704, P21941, Q9HC84, P15502, Q14050, P08493, P08572, Q9BZV3, Q9BXX0, Q13361, Q99102, Q14055, Q05707, Q9NP70, P05997, Q6W4X9, P16112, Q99217, P02751, Q92626, P21810, P08123, P02462, P39059, P56706, Q17RW2, P20908, Q99218, P02458, P56705,…
GO:0004888	transmembrane signaling receptor activity	2.79203e-30	3.80905e-33	375	4898	1900	46025	0	0	Q96HF1, P31785, O95944, P22888, Q13873, P29460, Q04771, Q92956, P29376, Q14416, P30510, P13224, Q8WWV6, Q9NYQ7, P54753, Q6PRD1, P22794, P55085, P05538, O15031, Q8TCU5, O75197, Q8IZF5, Q15198, P29323, P11912, O00451, Q14954, Q99523, P30460, P22607, Q9NYZ4, Q14833, Q14213, O95490, O15399, Q96K78, P42701, Q16620, O00220, Q9NS68, P35590, P25116, Q13291, P07949, O75581, P12319, Q8N423, P23471, O95256,…
GO:0042379	chemokine receptor binding	5.99368e-27	8.17692e-30	47	4898	69	46025	0	0	P10720, Q99616, O15444, P13500, P02775, P78556, P02778, Q16627, P55773, P13501, P01031, Q07325, O43927, P22362, P19876, P13236, P47992, Q03403, P55774, P42830, P09341, P80162, P02776, P16619, O00175, Q8NHW4, O00585, P48061, P80098, Q9Y4X3, Q9Y258, Q16663, O00626, P78423, Q99731, P51671, O14625, P19875, P10145, P80075, O95715, Q92583, Q9UBD3, P10147, Q9NRJ3, O15467, Q9H2A7
GO:0030414	peptidase inhibitor activity	2.03377e-26	2.77459e-29	120	4898	376	46025	0	0	Q8IUB3, Q06033, P20742, Q6IE38, P05543, O76096, P01185, Q9H4G1, P01042, O43291, P05154, P05155, Q01955, P01011, Q99727, Q9NQ38, Q86U17, P01019, P08519, P19823, P49223, O60575, P28325, P10646, P16035, Q14624, Q5W186, O95925, Q14393, P12111, P0C0L4, P31025, P00995, Q99935, P36955, Q86UX2, Q5DID0, P01009, P03973, Q8IUA0, Q1W4C9, A8K2U0, Q6IE37, Q02388, Q9HC57, Q9BQ16, P09228, Q6YHK3, Q6UXX5, P20155,…
GO:0061134	peptidase regulator activity	7.98349e-25	1.08915e-27	125	4898	416	46025	0	0	Q96HF1, Q8IUB3, Q06033, P20742, Q6IE38, P50281, P05543, O76096, P01185, Q9H4G1, P01042, O43291, P23142, P05154, P05155, Q01955, P01011, Q99727, Q9NQ38, Q86U17, P01019, P08519, P19823, P49223, O60575, P28325, P10646, P16035, Q14624, Q5W186, O95925, Q14393, P12111, P0C0L4, P31025, P00995, Q99935, P36955, Q86UX2, Q5DID0, P01009, P03973, Q8IUA0, Q1W4C9, A8K2U0, Q6IE37, Q02388, Q9HC57, Q9BQ16, P09228,…
GO:0061135	endopeptidase regulator activity	1.17234e-23	1.59937e-26	114	4898	369	46025	0	0	Q96HF1, Q06033, P20742, Q6IE38, P05543, O76096, P01185, Q9H4G1, P01042, O43291, P05154, P05155, Q01955, P01011, Q99727, Q9NQ38, Q86U17, P01019, P08519, P19823, P49223, O60575, P28325, P10646, P16035, Q14624, Q5W186, O95925, Q14393, P12111, P0C0L4, P31025, P00995, Q99935, P36955, Q86UX2, P01009, P03973, Q8IUA0, Q1W4C9, A8K2U0, Q6IE37, Q02388, Q9HC57, Q9BQ16, P09228, Q6YHK3, Q6UXX5, P20155, P19827,…
GO:0004866	endopeptidase inhibitor activity	1.22865e-23	1.67619e-26	113	4898	364	46025	0	0	Q06033, P20742, Q6IE38, P05543, O76096, P01185, Q9H4G1, P01042, O43291, P05154, P05155, Q01955, P01011, Q99727, Q9NQ38, Q86U17, P01019, P08519, P19823, P49223, O60575, P28325, P10646, P16035, Q14624, Q5W186, O95925, Q14393, P12111, P0C0L4, P31025, P00995, Q99935, P36955, Q86UX2, P01009, P03973, Q8IUA0, Q1W4C9, A8K2U0, Q6IE37, Q02388, Q9HC57, Q9BQ16, P09228, Q6YHK3, Q6UXX5, P20155, P19827, Q8IW75,…
GO:0038023	signaling receptor activity	4.97118e-23	6.78197e-26	387	4898	2150	46025	0	0	Q96HF1, P31785, O95944, P22888, Q13873, P29460, Q04771, Q92956, P29376, Q14416, P30510, P13224, Q8WWV6, Q9NYQ7, P54753, P31431, Q6PRD1, P22794, P55085, P05538, O15031, Q8TCU5, O75197, Q8IZF5, Q15198, P29323, P11912, O00451, Q14954, Q99523, P30460, P22607, Q9NYZ4, Q14833, Q14213, O95490, O15399, O60895, Q96K78, P42701, Q16620, O00220, Q9NS68, P35590, P25116, Q13291, P07949, O75581, P12319, Q8N423,…
GO:0032393	MHC class I receptor activity	1.36969e-22	1.8686e-25	28	4898	30	46025	0	0	P30508, P16188, P30460, P30455, P04439, P30511, Q9BZM6, P30462, Q09160, P30510, Q14953, Q95460, P17693, Q9BZM5, P01893, P43629, P01889, P13746, O95971, P30499, Q9BZM4, Q8NHL6, P13747, P30475, P30443, P30501, Q14943, Q8N423
GO:0005178	integrin binding	1.65881e-21	2.26305e-24	53	4898	105	46025	0	0	Q96HF1, O75077, O94769, P50281, P02461, P18084, Q15582, P29279, P78536, Q13316, P20908, O00622, Q01955, O43854, Q92752, P07942, Q9UP79, P13598, Q76LX8, Q9P0K1, Q15762, Q9UNA0, Q07092, Q99965, P16035, Q6UXI9, Q9Y5C1, O14672, P35443, P04004, Q8IUX8, P05019, Q9UQP3, P04216, Q9BX67, Q14956, O15230, P56199, P07996, P19320, P05556, P55268, P18564, P05362, P22105, O75326, Q8N2S1, P08648, O75078, P04275,…
GO:0019199	transmembrane receptor protein kinase activity	1.498e-19	2.04365e-22	70	4898	185	46025	0	0	Q13873, P17813, Q04771, P29376, P54753, Q04912, Q15198, P00533, P36897, Q12866, P29323, P30530, P22455, P14616, P22607, P08922, P29322, Q16288, O00238, Q16620, P37173, P35590, Q14766, P21802, P07949, P52797, P36896, Q03167, P16234, P54756, P27037, P54764, P11362, Q16832, Q8N441, Q16671, Q13705, Q13308, P08069, P29317, P09619, P36894, Q01974, Q02763, Q9UM73, P04629, P36888, O15197, O14786, P11717,…
GO:0004867	serine-type endopeptidase inhibitor activity	1.50493e-19	2.05311e-22	79	4898	227	46025	0	0	Q06033, P20742, Q6IE38, P05543, O43291, P05154, P05155, P01011, Q9NQ38, Q86U17, P01019, P19823, P49223, O60575, P10646, Q14624, O95925, P12111, P00995, P36955, Q86UX2, P01009, P03973, Q8IUA0, A8K2U0, Q1W4C9, Q6IE37, Q02388, Q9HC57, Q6YHK3, Q6UXX5, P20155, P19827, Q8IW75, Q9UHG2, P01008, P58062, Q8WWY7, Q06481, Q2UY09, Q14508, P20848, P05067, Q8IUB2, O95428, P19957, Q8TCV5, Q6UXR4, P07093, Q6UWN8,…
GO:0004857	enzyme inhibitor activity	1.59256e-19	2.17266e-22	143	4898	576	46025	0	0	P02656, Q8IUB3, Q06033, P20742, Q9HAW7, P01185, Q9H4G1, P01042, P05154, P05155, Q99727, O94813, P01019, P19823, O60575, Q9HAW9, P10646, P16035, Q5W186, O95925, Q14393, P12111, P0C7U0, Q86UX2, Q1W4C9, Q02388, Q9HC57, Q9BQ16, Q8IWU2, P19827, P01008, O75581, Q14508, P05067, Q5W188, P01037, Q8TCV5, P07093, Q6UWN8, P01036, O60676, Q9BQY6, P01034, P05121, O43278, P01023, Q9H3Y0, Q8IZJ3, P11021, P02654,…
GO:0043498	cell surface binding	5.04045e-18	6.87647e-21	41	4898	75	46025	0	0	P06727, P00747, P18428, Q14242, Q00604, O75594, Q04118, P16150, P01137, Q15848, P02675, P15692, Q8WWQ8, P02768, P02749, O60603, P04085, Q9UGM3, P02741, P02671, Q9Y5C1, P06729, P08246, P35247, P04054, P07996, P02679, P01127, P11226, Q9NY15, P05362, P16109, P17213, P09326, P01588, Q99217, P04196, P15813, P08697, Q8N423, Q9NRA1
GO:0005509	calcium ion binding	2.16372e-17	2.95187e-20	299	4898	1659	46025	0	0	Q8TAB3, P03956, P50281, Q9NYQ7, Q14112, Q5T1H1, P00736, Q02509, Q6UXH8, Q8NI22, P39877, O94813, Q9NPY3, Q9UN67, P02818, Q9UN75, Q9Y5F8, Q9Y5E5, Q9Y5G3, Q9Y5G8, P04054, Q13822, P07996, Q9BV94, Q99466, Q15485, Q7Z442, Q8TER0, Q14515, P13497, O43897, Q9Y5G1, P55289, P07478, Q9ULB4, Q8IWU6, Q9Y680, P07949, Q9Y5E1, Q9NR61, Q9Y219, Q9Y5I4, Q9H4D0, Q9Y5H0, Q9BZM2, Q9UHF1, Q6MZW2, Q8NDA2, Q9BXN1, Q13316,…
GO:0004252	serine-type endopeptidase activity	7.99192e-17	1.0903e-19	103	4898	377	46025	0	0	P07288, P00747, Q92876, Q9UI38, P10323, P22894, Q9UKQ9, P51124, P08218, A4D1T9, P09871, P17538, P00749, P00736, Q9NRR2, Q6PEW0, Q15661, Q8NHM4, P08861, Q7RTY9, P48740, P08519, Q9H2R5, P00751, Q9UKR0, Q14703, Q9UKR3, P08709, Q99895, Q8IYP2, P08246, Q92743, Q7RTY7, Q6UWY2, A1L453, Q9Y337, Q16549, P00748, Q5K4E3, P56730, O00187, P02788, P08253, P00740, P07478, P03952, Q14520, A8MTI9, P40313, Q7RTY5,…
GO:0005184	neuropeptide hormone activity	2.69349e-15	3.67461e-18	22	4898	26	46025	0	0	O15130, P01282, P01185, P20396, O15240, P01178, P10092, P06307, P07492, P81277, O00230, P10082, O00253, P01210, P06850, P30990, P83859, P55089, P22466, P01303, P18509, Q13519
GO:0004714	transmembrane receptor protein tyrosine kinase activity	1.43085e-14	1.95205e-17	54	4898	144	46025	0	0	P54756, P16234, P29376, P54764, P11362, P54753, Q16832, Q8N441, Q13308, P08069, P29317, P09619, Q04912, Q15198, Q01974, P00533, Q02763, Q12866, P29323, Q9UM73, P22455, P14616, P30530, O14786, O15197, P36888, P04629, P22607, P11717, P34925, P08922, P29322, Q15375, Q16288, Q01973, Q9NZV1, P07333, Q16620, Q12805, P35916, Q15303, P08581, P54762, O60462, Q15768, P35590, P54760, P21802, P06213, P07949,…
GO:0017171	serine hydrolase activity	1.81547e-14	2.47677e-17	111	4898	452	46025	0	0	P07288, P00747, Q92876, Q9UI38, P10323, P22894, Q9UKQ9, P51124, P22303, P08218, A4D1T9, P09871, P17538, P00749, P00736, Q9NRR2, Q6PEW0, Q15661, Q8NHM4, P08861, Q7RTY9, P48740, P08519, Q9H2R5, P00751, Q9UKR0, Q14703, Q9UKR3, P08709, Q99895, P10745, Q8IYP2, P08246, Q92743, Q7RTY7, Q6UWY2, A1L453, Q9Y337, Q16549, P00748, Q5K4E3, P56730, O00187, P02788, P08253, P00740, P07478, P03952, Q14520, A8MTI9,…
GO:0008236	serine-type peptidase activity	3.03213e-14	4.13661e-17	110	4898	449	46025	0	0	P07288, P00747, Q92876, Q9UI38, P10323, P22894, Q9UKQ9, P51124, P08218, A4D1T9, P09871, P17538, P00749, P00736, Q9NRR2, Q6PEW0, Q15661, Q8NHM4, P08861, Q7RTY9, P48740, P08519, Q9H2R5, P00751, Q9UKR0, Q14703, Q9UKR3, P08709, Q99895, P10745, Q8IYP2, P08246, Q92743, Q7RTY7, Q6UWY2, A1L453, Q9Y337, Q16549, P00748, Q5K4E3, P56730, O00187, P02788, P08253, P00740, P07478, P03952, Q14520, A8MTI9, P40313,…
GO:0070851	growth factor receptor binding	6.06538e-14	8.27473e-17	48	4898	121	46025	0	0	O60602, P01133, P21781, P16234, Q9Y639, P29460, P20809, P14778, P13232, P12034, Q9GZV9, P29459, O60565, P78536, P05113, Q12913, P60568, P15692, P05231, O95750, P04141, P15248, O76093, P09619, P04085, Q96FE5, Q9NSA1, Q5VWK5, P49767, P09919, P55075, O43915, P01127, P08620, O15520, P08700, Q9NR96, P42701, Q9HBE4, O60258, P49765, P08648, Q15303, Q12805, P05106, P22301, Q9NRA1, P05112
GO:0017147	Wnt-protein binding	1.39314e-13	1.90059e-16	24	4898	34	46025	0	0	Q96HF1, Q6FHJ7, Q16827, Q9ULV1, P34925, Q9NPG1, O75084, Q8N474, Q9H461, Q01973, Q5T4F7, O60353, Q96CG8, Q92765, O75197, Q9ULW2, Q14332, Q01974, O00144, O75581, Q8J025, Q13467, Q9UP38, Q99835
GO:0005518	collagen binding	1.4686e-13	2.00354e-16	35	4898	70	46025	0	0	P35443, P14543, Q9GZZ8, O94769, Q9H6X2, P22303, P56199, Q9UKX5, P07996, P01127, Q14112, P05556, Q16832, Q7Z7G0, Q6UXA7, P17301, O75578, P40197, P14780, Q05707, P50454, P04275, P25940, P04085, Q9UKZ9, P51884, Q15113, Q13797, P02751, P16070, P09486, O75445, P49747, Q9NZW4, P07585
GO:0019955	cytokine binding	2.02343e-13	2.76048e-16	39	4898	86	46025	0	0	P31785, Q13253, P29460, Q9ULV1, P17813, Q04771, P32248, P14784, O95813, P19438, P29459, O60565, P01589, P06756, P36897, P01023, Q5VWK5, P08246, O14786, P15260, Q8NI17, Q9H2X0, Q9Y6Q6, P07996, P37023, Q969J5, P26992, O95998, P42701, P07333, P10600, Q8N2S1, P37173, O60462, Q12891, O75462, P41271, Q96PD4, Q03167
GO:0042813	Wnt-activated receptor activity	1.34215e-12	1.83103e-15	19	4898	23	46025	0	0	Q96HF1, Q6FHJ7, Q9ULV1, P34925, Q9NPG1, O75084, Q8N474, Q9H461, Q5T4F7, O60353, Q92765, O75197, Q9ULW2, Q14332, O00144, O75581, Q13467, Q9UP38, Q99835
GO:0004871	signal transducer activity	7.70226e-11	1.05079e-13	411	4898	2726	46025	0	0	Q96HF1, P31785, O95944, P22888, Q13873, P29460, Q04771, Q92956, P29376, Q14416, P30510, Q5T9L3, P13224, Q8WWV6, Q9NYQ7, P54753, P31431, Q6PRD1, P22794, P55085, P05538, O15031, Q8TCU5, O75197, Q8IZF5, Q15198, P29323, P18509, P11912, O00451, Q14954, Q99523, P30460, P22607, Q9NQ34, Q9NYZ4, Q14833, Q14213, O95490, O15399, O60895, Q96K78, P42701, Q16620, O00220, Q9NS68, P35590, P25116, Q13291, P07949,…
GO:0060089	molecular transducer activity	7.70226e-11	1.05079e-13	411	4898	2726	46025	0	0	Q96HF1, P31785, O95944, P22888, Q13873, P29460, Q04771, Q92956, P29376, Q14416, P30510, Q5T9L3, P13224, Q8WWV6, Q9NYQ7, P54753, P31431, Q6PRD1, P22794, P55085, P05538, O15031, Q8TCU5, O75197, Q8IZF5, Q15198, P29323, P18509, P11912, O00451, Q14954, Q99523, P30460, P22607, Q9NQ34, Q9NYZ4, Q14833, Q14213, O95490, O15399, O60895, Q96K78, P42701, Q16620, O00220, Q9NS68, P35590, P25116, Q13291, P07949,…
GO:0043499	eukaryotic cell surface binding	5.0077e-10	6.83179e-13	18	4898	25	46025	0	0	P06727, P07996, P02679, P01127, P11226, P01137, Q15848, P02675, P16109, P02749, P09326, P01588, P04085, P15813, P08697, P02671, Q8N423, P06729
GO:0050840	extracellular matrix binding	1.32366e-09	1.80581e-12	29	4898	64	46025	0	0	P35443, P04004, P14543, P35052, Q9GZZ8, O00468, P22303, P07996, Q15582, Q68BL8, Q16610, P05556, Q13316, P10451, Q6UXA7, O00622, Q92563, Q9HB63, P15692, Q9GZM7, P12107, O94813, Q68BL7, P50895, P08514, Q13797, P09486, P21810, P07585
GO:0048018	receptor agonist activity	1.67811e-09	2.28937e-12	14	4898	16	46025	0	0	Q96HF1, P15692, P56704, P56703, Q9H1J5, P41221, O00755, P04628, P09544, O60565, O43927, Q14393, O00744, P56705
GO:0032395	MHC class II receptor activity	2.04784e-09	2.79378e-12	13	4898	14	46025	0	0	P20036, P01903, P01906, Q29974, P20039, P79483, P06340, P01909, P01920, P13760, P13765, P05538, P13761
GO:0003823	antigen binding	7.51276e-09	1.02493e-11	53	4898	185	46025	0	0	P04435, P06311, P04229, Q9TQE0, P04434, Q29974, P01733, P03979, P29017, P06331, O00602, P04438, P01764, P04207, P01591, P13761, Q8N149, P01601, P04431, P12018, P06313, Q15485, P13760, P01744, P06316, P18627, P04437, P23083, Q8NHJ6, Q8N6C8, P01602, P04432, P01737, P06314, P06312, P18135, P01621, Q15392, P09326, O15533, P06315, P43628, P04211, P18136, Q13291, P01743, P04436, P15813, P06319, P04433,…
GO:0004175	endopeptidase activity	1.99077e-08	2.71592e-11	182	4898	1051	46025	0	0	Q92876, Q9UI38, P10323, P03956, Q9UKP4, P50281, P08218, Q6HA08, A4D1T9, Q9BZ11, P78536, P30101, Q9P2N4, P09871, P00749, P00736, P51511, Q9NRR2, Q15661, P48740, Q9P0K1, Q9H2R5, Q92643, Q8TCT6, Q9UKR0, P00797, P58397, Q86TH1, P00748, Q16549, Q5K4E3, P56730, Q8WXS8, P13497, Q8TE57, O43897, Q9H324, P00740, O96009, P07478, P03952, Q14520, A8MTI9, Q16819, Q7RTY5, P00750, Q9P0G3, P06681, P20151, P83110,…
GO:0005520	insulin-like growth factor binding	2.47297e-08	3.37376e-11	25	4898	54	46025	0	0	P83110, Q92743, P11717, Q96I82, P83105, Q8WX77, P29279, Q9NZV1, P17936, O00622, P22692, P08069, Q9NQ30, P24592, P48745, P35858, O76076, P06756, Q16270, P18065, P06213, P08833, O95388, P24593, O95389
GO:0001948	glycoprotein binding	2.62966e-08	3.58753e-11	34	4898	93	46025	0	0	P35052, P19883, O75487, P01730, P11362, P11215, P20908, Q9NZK5, Q8TD06, P05107, P02749, O95994, Q9Y625, O94813, O75093, P78333, P98155, Q02246, Q8N158, P06127, P08709, Q96DZ1, P01130, P11717, Q9GZZ8, P51654, P07996, P05556, P16109, P18827, P04275, P04196, Q13438, P49747
GO:0005001	transmembrane receptor protein tyrosine phosphatase activity	3.47419e-08	4.73969e-11	14	4898	18	46025	0	0	Q92932, P23471, Q16827, P23470, P23467, Q92729, P28827, Q13332, P10586, Q9HD43, P08575, P23468, P18433, Q16849
GO:0019198	transmembrane receptor protein phosphatase activity	3.47419e-08	4.73969e-11	14	4898	18	46025	0	0	Q92932, P23471, Q16827, P23470, P23467, Q92729, P28827, Q13332, P10586, Q9HD43, P08575, P23468, P18433, Q16849
GO:0032403	protein complex binding	5.04245e-08	6.87919e-11	90	4898	419	46025	0	0	Q96HF1, P09693, O94769, P17813, P50281, Q04771, P02461, Q8WWV6, P78536, O00622, Q01955, P14780, O43854, Q92752, Q9UP79, P13598, Q9P0K1, Q99965, P16035, Q92637, Q7Z4H4, Q9Y5C1, P07766, P04004, Q8IUX8, P05019, P04216, Q9BX67, P07996, P05556, P01308, P31994, P22105, P08648, Q13751, P27797, P12319, P36896, Q13253, O75077, P19883, P18084, Q15582, P27037, P29279, Q13316, P12314, Q13705, P20908, P51460,…
GO:0005109	frizzled binding	5.31425e-08	7.25001e-11	18	4898	30	46025	0	0	P56704, Q9UBV4, Q00604, P41221, P34925, P04628, P09544, Q13145, Q8N474, P56706, Q9H1J7, P56705, Q96CG8, P56703, Q9H1J5, O00755, Q01974, O75581
GO:0004522	pancreatic ribonuclease activity	1.13145e-07	1.54359e-10	12	4898	14	46025	0	0	Q8TAA1, P34096, P03950, Q9H1E1, P12724, P60153, Q5GAN4, Q93091, Q5GAN3, Q8TDE3, P07998, Q5GAN6
GO:0004896	cytokine receptor activity	3.23718e-07	4.41635e-10	45	4898	158	46025	0	0	Q01344, P31785, Q99665, Q6UWB1, P29460, Q01113, P14778, P32248, P14784, P15509, P01589, P16471, Q9HBE5, P32927, P48357, P38484, Q96F46, Q8N6P7, Q14626, P40238, Q5VWK5, Q14627, O00451, Q9NP60, P36888, P15260, Q8NI17, Q99650, Q9HB29, P10912, Q08334, Q969J5, Q13261, P24394, P26951, Q14213, P26992, Q8NAC3, Q13478, P42701, P56159, Q8IU57, P19235, Q13651, P78552
GO:0005515	protein binding	4.48072e-07	6.11285e-10	1188	4898	9599	46025	0	0	P02656, Q92876, O15130, Q5ZPR3, P10323, P35052, Q04771, Q92956, P01215, Q9NYQ7, P30101, Q9HCJ2, Q9NPF7, P02724, P05155, P01574, Q8TCU5, P01019, Q13449, Q99523, Q8N729, Q86TH1, P00748, P09681, Q9Y2G8, P05305, Q96KC8, P11117, Q9Y6R7, Q96RP3, Q15392, P03952, Q9UBS4, Q9P0W0, P01008, P16112, P02751, P07949, Q13438, Q9NR61, P12319, Q8WYK1, P08123, P41159, O75077, P20809, P14778, Q9H293, P18084, O75787,…
GO:0030545	receptor regulator activity	4.66925e-07	6.37006e-10	23	4898	52	46025	0	0	Q96HF1, P01133, P56704, P30533, O94907, P41221, O00468, P04628, P09544, O60565, P13501, P01344, O95998, O43927, P56705, P15692, Q9Y264, P56703, Q9H1J5, O00755, Q92626, Q14393, O00744
GO:0071855	neuropeptide receptor binding	8.27957e-07	1.12955e-09	13	4898	18	46025	0	0	P42127, Q96RP3, P81277, P05305, P01189, P06850, P20366, Q969E3, P83859, P01303, P01286, P20382, P48645
GO:0019865	immunoglobulin binding	9.66171e-07	1.31811e-09	14	4898	21	46025	0	0	P04275, P02760, Q8WWV6, A6NKC4, P30273, P04196, P12314, Q92637, P12319, P12318, P31994, P08637, O75015, P55899
GO:0003756	protein disulfide isomerase activity	1.34609e-06	1.83641e-09	10	4898	11	46025	0	0	Q15084, Q13087, Q9BS26, P30040, P05106, Q96JJ7, P30101, P13667, Q14554, P07237
GO:0016864	intramolecular oxidoreductase activity, transposing S-S bonds	1.34609e-06	1.83641e-09	10	4898	11	46025	0	0	Q15084, Q13087, Q9BS26, P30040, P05106, Q96JJ7, P30101, P13667, Q14554, P07237
GO:0004222	metalloendopeptidase activity	1.76005e-06	2.40116e-09	68	4898	304	46025	0	0	P03956, Q9UKP4, P50281, P22894, Q9H013, O60882, Q6HA08, Q9BZ11, P78536, Q9NPA2, Q9P2N4, P51511, P14780, Q9UP79, Q9P0K1, Q9NRE1, P59510, Q8TC27, P24347, Q99965, Q9UKJ8, Q8N119, P58397, Q9H239, Q86TH1, O15072, Q8TE58, Q8WXS8, P13497, O15204, Q8TE57, O43897, P08253, Q9H324, P09238, Q16820, Q16819, P09237, O75077, O95428, P45452, O43506, P39900, P08254, Q6ZMM2, O43847, Q76LX8, O75173, Q8TE56, Q9UNA0,…
GO:0015026	coreceptor activity	2.10044e-06	2.86554e-09	15	4898	25	46025	0	0	O14786, P33681, Q9Y6Y9, Q05996, O75197, P10747, O60894, P27037, P01730, O75581, Q92692, O60896, Q03167, O60895, P42081
GO:0048407	platelet-derived growth factor binding	3.85276e-06	5.25615e-09	11	4898	14	46025	0	0	P08123, P16234, P02462, P09619, P02461, P04085, P01127, P02452, P20908, P02458, P12109
GO:0042562	hormone binding	5.46281e-06	7.45268e-09	27	4898	76	46025	0	0	P43220, Q03431, P22888, P23945, P55290, P47871, Q02643, P05543, P10912, P02766, P24387, Q16671, O75556, P34998, P08069, P20594, P24530, P16471, P04278, O43847, Q96RP3, P16066, P06213, P27797, P30988, P17342, P48546
GO:0042056	chemoattractant activity	5.64946e-06	7.70731e-09	12	4898	17	46025	0	0	P15692, P21781, O43915, P49765, P13521, P12644, Q16663, P10147, O15520, O15467, P13501, P49767
GO:0008066	glutamate receptor activity	6.94283e-06	9.4718e-09	26	4898	72	46025	0	0	O15303, Q13003, Q14957, Q14416, P48058, P42261, O00222, Q14833, P42263, Q14831, O15399, Q13255, Q13002, Q8TCU5, Q16099, Q13224, Q05586, Q16478, O43424, O60391, P41594, P42262, Q9ULK0, P39086, Q14832, Q12879
GO:0019864	IgG binding	1.15299e-05	1.57297e-08	9	4898	10	46025	0	0	A6NKC4, P30273, P12314, Q92637, P12318, P31994, P08637, P55899, O75015
GO:0005132	interferon-alpha/beta receptor binding	1.19973e-05	1.63674e-08	8	4898	8	46025	0	0	Q9P0W0, P01567, P05014, P01563, P01574, P01562, P01571, P05015
GO:0050253	retinyl-palmitate esterase activity	1.30444e-05	1.77959e-08	11	4898	15	46025	0	0	O00748, Q17RR3, P07098, P16233, P54317, Q6NT32, P23141, P11150, Q9Y5X9, Q6UWW8, P19835
GO:0030546	receptor activator activity	2.39762e-05	3.27097e-08	17	4898	36	46025	0	0	Q96HF1, P01133, P56704, P41221, P04628, P09544, O60565, P01344, O43927, P56705, P15692, Q9Y264, P56703, Q9H1J5, O00755, O00744, Q14393
GO:0043394	proteoglycan binding	2.44452e-05	3.33495e-08	14	4898	25	46025	0	0	P35052, Q9Y625, O94813, O75093, P19883, O75487, P78333, P51654, P07996, P04196, Q8N158, P49747, P20908, Q9NZK5
GO:0016862	intramolecular oxidoreductase activity, interconverting keto- and enol-groups	2.85732e-05	3.89811e-08	10	4898	13	46025	0	0	Q15084, Q13087, Q9BS26, P30040, P05106, Q96JJ7, P30101, P13667, Q14554, P07237
GO:0070325	lipoprotein particle receptor binding	3.74554e-05	5.10987e-08	12	4898	19	46025	0	0	Q6Q788, P02656, P02652, P30533, P14625, P02649, O94907, P78509, Q8NBP7, P02647, Q14696, P04114
GO:0048020	CCR chemokine receptor binding	3.76904e-05	5.14194e-08	11	4898	16	46025	0	0	P13236, O00585, O15444, P80098, P13500, P80075, P10147, Q99731, P55773, P13501, O43927
GO:0017046	peptide hormone binding	6.14359e-05	8.38143e-08	18	4898	42	46025	0	0	P43220, Q03431, P22888, P23945, P47871, Q02643, P10912, P24387, P34998, P08069, P20594, P24530, P16471, P16066, P06213, P30988, P17342, P48546
GO:0050839	cell adhesion molecule binding	8.08053e-05	1.10239e-07	27	4898	85	46025	0	0	Q9Y639, P55290, O14522, Q9P2S2, Q96DB9, P19320, P11362, Q92692, P23468, P14151, P12830, Q86YT9, Q9ULB1, P58400, Q9NQS3, P28827, Q15762, Q13224, P78325, Q9NZ94, P05106, P15813, Q8N2Q7, P20701, Q8N423, Q8NFZ4, Q12879
GO:0005161	platelet-derived growth factor receptor binding	9.64322e-05	1.31558e-07	11	4898	17	46025	0	0	P15692, P16234, O43915, P14778, P08648, P09619, P04085, P01127, P05106, Q12913, Q9NRA1
GO:0015277	kainate selective glutamate receptor activity	9.77767e-05	1.33392e-07	8	4898	9	46025	0	0	Q13003, Q13002, Q16099, P42261, P48058, Q16478, P42262, P39086
GO:0001968	fibronectin binding	0.000103357	1.41006e-07	15	4898	31	46025	0	0	Q96HF1, P15692, P35443, P14780, Q9GZZ8, P08519, Q76M96, P55001, P07996, P05556, P31431, P29279, P13612, Q6UXA7, P24593
GO:0005114	type II transforming growth factor beta receptor binding	0.000112879	1.53996e-07	7	4898	7	46025	0	0	P61812, Q13145, P10600, P01137, P36897, P17813, Q03167
GO:0005172	vascular endothelial growth factor receptor binding	0.000112879	1.53996e-07	7	4898	7	46025	0	0	P15692, O60565, O43915, P05106, P49765, P08648, P49767
GO:0042605	peptide antigen binding	0.000129765	1.77033e-07	13	4898	24	46025	0	0	P04435, P01737, P03979, P04229, Q15392, Q9TQE0, O15533, Q29974, P01733, P04436, P13760, P04437, P13761
GO:0005160	transforming growth factor beta receptor binding	0.000177947	2.42765e-07	12	4898	21	46025	0	0	P61812, P10600, P17813, O00292, P37173, O75610, Q13145, P01137, P36897, P03971, Q03167, P55103
GO:0008237	metallopeptidase activity	0.000353872	4.82772e-07	90	4898	500	46025	0	0	P03956, Q9UKP4, P50281, P15169, P22894, Q9H013, O60882, Q6HA08, Q9BZ11, P78536, Q9NPA2, Q9P2N4, P51511, P14780, Q8N436, Q9UP79, P48052, Q9P0K1, P15085, Q9NRE1, P59510, Q8TC27, P24347, Q8IVL8, Q99965, Q9UKJ8, Q8N119, P58397, Q9H239, Q86TH1, O15072, Q8TE58, P82987, Q8N4T0, Q8WXS8, P13497, Q8TE57, O15204, O43897, P08253, Q8WXQ8, Q9H324, P09238, Q16820, Q16819, P09237, Q9HBJ8, O95428, O75077, Q9UI42,…
GO:0005024	transforming growth factor beta-activated receptor activity	0.000430777	5.8769e-07	16	4898	38	46025	0	0	Q13873, P17813, Q04771, P27037, P37023, O00238, Q16671, Q13705, Q8N2S1, P37173, P36894, Q14766, P36897, Q8NER5, P36896, Q03167
GO:0004065	arylsulfatase activity	0.000610203	8.32473e-07	9	4898	13	46025	0	0	Q5FYB0, P51690, Q5FYB1, P54793, Q8IWU6, Q96EG1, Q8IWU5, P51689, Q6UWY0
GO:0031994	insulin-like growth factor I binding	0.000819053	1.1174e-06	7	4898	8	46025	0	0	P24592, P18065, P06213, P17936, P24593, P06756, P08069
GO:0005104	fibroblast growth factor receptor binding	0.000964165	1.31537e-06	11	4898	20	46025	0	0	O95750, P55075, P21781, O60258, Q9Y639, O76093, P12034, Q9GZV9, P08620, O15520, Q9NSA1
GO:0010576	metalloenzyme regulator activity	0.000964165	1.31537e-06	11	4898	20	46025	0	0	Q96HF1, Q01955, Q96NZ8, Q99727, Q08629, Q8TEU8, O95980, P01033, P35625, P16035, Q9BQ16
GO:0004972	N-methyl-D-aspartate selective glutamate receptor activity	0.00106185	1.44864e-06	6	4898	6	46025	0	0	Q14957, Q8TCU5, Q13224, O15399, Q05586, Q12879
GO:0030020	extracellular matrix structural constituent conferring tensile strength	0.00106185	1.44864e-06	6	4898	6	46025	0	0	P20849, Q99715, Q14055, P13942, Q14050, P02458
GO:0043236	laminin binding	0.00113904	1.55395e-06	15	4898	36	46025	0	0	Q9HB63, P35443, Q9GZM7, P14543, P35052, Q9GZZ8, O94813, O00468, P22303, P07996, P50895, Q16610, Q13797, P05556, Q6UXA7
GO:0051635	bacterial cell surface binding	0.00125246	1.70867e-06	14	4898	32	46025	0	0	P08246, P18428, Q14242, Q8WWQ8, P35247, P17213, O60603, O75594, Q9UGM3, P11226, P02741, P16150, Q04118, Q9NY15
GO:0004675	transmembrane receptor protein serine/threonine kinase activity	0.00146078	1.99288e-06	16	4898	41	46025	0	0	Q13873, P17813, Q04771, P27037, P37023, O00238, Q16671, Q13705, Q8N2S1, P37173, P36894, Q14766, P36897, Q8NER5, P36896, Q03167
GO:0016892	endoribonuclease activity, producing 3'-phosphomonoesters	0.00210844	2.87645e-06	13	4898	29	46025	0	0	Q8TAA1, P34096, P03950, Q9H1E1, P12724, P60153, Q5GAN4, Q93091, Q5GAN3, Q8TDE3, P07998, O00584, Q5GAN6
GO:0043121	neurotrophin binding	0.00334352	4.56142e-06	7	4898	9	46025	0	0	Q16288, P04629, Q99523, Q16620, P20783, P08138, P09958
GO:0008191	metalloendopeptidase inhibitor activity	0.00503403	6.86771e-06	10	4898	19	46025	0	0	Q01955, Q96NZ8, Q99727, Q08629, Q8TEU8, O95980, P01033, P35625, Q9BQ16, P16035
GO:0048551	metalloenzyme inhibitor activity	0.00503403	6.86771e-06	10	4898	19	46025	0	0	Q01955, Q96NZ8, Q99727, Q08629, Q8TEU8, O95980, P01033, P35625, Q9BQ16, P16035
GO:0071813	lipoprotein particle binding	0.0052181	7.11883e-06	13	4898	31	46025	0	0	Q8WWQ8, P02652, P02649, P55290, Q8IV16, P07996, Q92673, P98155, P02741, P02647, Q9NY15, P11150, Q14162
GO:0071814	protein-lipid complex binding	0.0052181	7.11883e-06	13	4898	31	46025	0	0	Q8WWQ8, P02652, P02649, P55290, Q8IV16, P07996, Q92673, P98155, P02741, P02647, Q9NY15, P11150, Q14162
GO:0005537	mannose binding	0.00954618	1.30234e-05	11	4898	24	46025	0	0	O00462, P10323, P11717, P35613, P20645, Q9Y6Z7, P11226, Q9H0V9, P49257, Q9BWP8, P22897
GO:0016894	endonuclease activity, active with either ribo- or deoxyribonucleic acids and producing 3'-phosphomonoesters	0.00968651	1.32149e-05	14	4898	37	46025	0	0	Q8TAA1, P34096, P03950, Q9H1E1, P12724, P60153, Q5GAN4, Q93091, Q8WZ79, Q5GAN3, Q8TDE3, P07998, O00584, Q5GAN6
GO:0005105	type 1 fibroblast growth factor receptor binding	0.00998703	1.36249e-05	5	4898	5	46025	0	0	Q9GZV9, P55075, O60258, Q9Y639, O76093
GO:0016019	peptidoglycan receptor activity	0.00998703	1.36249e-05	5	4898	5	46025	0	0	P08571, Q96LB8, Q96LB9, O75594, Q96PD5
GO:0070700	BMP receptor binding	0.00998703	1.36249e-05	5	4898	5	46025	0	0	P22003, P12643, P22004, P12645, P12644
GO:0048583	regulation of response to stimulus	2.43110088701962e-11	5.75681005687809e-15	386	3633	3009	41451	0.00%	0.00	Q96HF1, Q92876, Q13873, P29460, P50591, P07360, Q14563, P01258, P02461, P09544, Q8N907, Q5T9L3, P02778, P01236, P01042, Q9NPF7, O15123, P05155, P05107, P01574, O15031, O94813, P01019, Q8WVQ1, P12643, P02741, P05014, Q9BQB4, P18509, Q8N2Q7, Q16568, P56704, P30460, P80098, Q86TH1, P00748, P09681, Q9Y258, P05305, P04054, Q15485, P28039, P08700, P01308, Q15389, Q9NS68, P03952, P01588, Q8IWU6, P30461,…
GO:0050731	positive regulation of peptidyl-tyrosine phosphorylation	2.68726045860787e-11	6.36339204027437e-15	43	3633	130	41451	0.00%	0.00	Q9UBD9, P21781, P41159, P02790, P29460, P20809, P10721, P01241, P29459, Q15848, P05113, Q9NPF7, P13501, P60568, P04233, P05231, P15692, P04141, P01019, P78509, Q8IU54, P07766, O14786, P04004, P05019, O00206, Q9GZZ8, Q9NYY1, P01127, P08700, O15520, P01308, P01344, Q15389, Q9Y264, P06307, P49765, P01588, P01579, O75462, P13725, P15018, P05112
GO:0065008	regulation of biological quality	2.81920099932433e-11	6.67582524111847e-15	409	3633	3232	41451	0.00%	0.00	P02656, Q99616, Q92876, Q8NBS9, Q13873, P03956, Q14563, O95631, P01258, P02461, O14905, P20849, P01215, Q16627, P02675, P30101, P01236, P01042, P06865, O15123, P05155, O94856, P05107, P17301, P01574, O94813, P01019, P12643, P02818, Q9HAW9, P05014, P10646, O14773, P55089, Q8N2Q7, Q16568, P56704, P80098, Q86UL3, Q9H3N1, P00748, Q16549, P09681, Q9Y2G8, Q9Y258, P05305, P04054, Q8N135, P01308, P35475,…
GO:0040007	growth	3.2441446485983e-11	7.68208536253446e-15	175	3633	1101	41451	0.00%	0.00	Q96HF1, Q92876, Q13873, P29460, P01241, Q14563, O95631, P09544, P20849, P01215, Q9UBU3, O60565, P23582, P01185, P01137, P01236, P00749, Q9H1J7, Q12913, Q9NQ30, P15248, O94813, P01019, P12643, O95393, O95388, P55089, Q14393, P56704, Q86UL3, P05019, Q9H3N1, Q96I82, P05305, Q9UK05, P01160, Q9HC57, P01308, Q6Q788, P24592, P81277, P07478, Q8TB73, P09529, P22004, P18065, O75581, P05067, P83110, P21781,…
GO:0051272	positive regulation of cellular component movement	4.27579776899272e-11	1.01250243168191e-14	68	3633	282	41451	0.00%	0.00	P18428, P35968, Q13873, P13500, P14138, P01137, P02778, Q9NPF7, P13501, O00622, Q9H1J7, Q12913, P04233, P14780, P01019, P12643, O00175, P08709, Q9Y5C1, P49767, O00585, P04004, O43915, P80098, P05019, Q9Y258, P05305, P01127, P01308, O96014, P51671, Q15389, P16109, P10147, Q7LGC8, P21781, Q99969, P20366, Q16832, O43927, P61812, P15692, P05231, P13236, P47992, P07942, P20800, Q13093, P04085, P05121,…
GO:0048731	system development	5.23277168616211e-11	1.2391124049638e-14	561	3633	4737	41451	0.00%	0.00	Q92876, P29460, P35052, Q14563, O95631, Q16706, P20849, P01215, P02778, Q9HCJ2, Q9NPF7, P06865, Q9NQ30, Q6UXH8, Q8NF37, P01574, O94813, P01019, P12643, Q16787, Q16568, Q9Y5E5, Q86UL3, P09681, P05305, Q8N135, P08572, P11117, Q9NY15, O43897, O60258, Q15392, Q9NS68, P05997, P16112, P02647, P02751, Q9P0M4, Q9NR61, Q13214, P08123, P41159, P20809, Q92824, Q9H293, O75631, Q9UHF1, Q9UNI1, Q9BXN1, P07093,…
GO:0006957	complement activation, alternative pathway	7.45758910498725e-11	1.76594579800787e-14	13	3633	13	41451	0.00%	0.00	P07358, P02748, P27918, P07360, P01024, Q9BXR6, Q9Y279, P07357, P00751, P08603, P10643, P01031, P00746
GO:0050730	regulation of peptidyl-tyrosine phosphorylation	1.25014405537328e-10	2.96032217706199e-14	49	3633	169	41451	0.00%	0.00	Q96HF1, Q9UBD9, P21781, P41159, P02790, P29460, P20809, P10721, P01241, P29459, Q15848, P05113, Q9NPF7, P13501, P60568, P05107, P04233, P05231, P15692, P04141, Q9GZP0, P01019, P78509, P04085, Q8IU54, P07766, O14786, P04004, P05019, Q9GZZ8, O00206, Q9NYY1, Q8N474, Q969J5, P01127, P08700, O15520, P01308, P01344, Q15389, Q9Y264, P06307, P49765, P01588, P01579, O75462, P13725, P15018, P05112
GO:0050776	regulation of immune response	1.44170589568517e-10	3.41393771178114e-14	136	3633	796	41451	0.00%	0.00	P01563, P29460, P07360, P02461, P01137, Q9NPF7, P20851, Q12913, P05155, P05107, P01574, P48740, P25063, P02741, P05014, P07766, P43627, P30460, P10747, P04054, Q15485, P30488, P01889, P01566, P01308, P02747, P30466, P30461, Q9P0W0, Q9NZ08, P02647, P06681, P05067, P40200, P81534, P05112, Q9UEW3, P02790, P07358, P27918, P05231, P61812, P47992, P01570, P38484, P02745, P10643, P01023, P01374, Q9TNN7,…
GO:0080134	regulation of response to stress	1.95851257184459e-10	4.63772808866822e-14	134	3633	783	41451	0.00%	0.00	Q96HF1, P01563, P29460, P01258, Q9UBU3, P01137, P01042, Q9NPF7, P00749, Q12913, P05155, P01574, P01019, P48740, P05014, P04004, P00748, P10747, P05305, P28039, P01566, P01308, P16109, P03952, Q9P0W0, P01008, Q9NZ08, P00750, P05067, P81534, P05112, Q9UEW3, O75072, O60259, P02790, P56706, P20366, P07093, P04062, P05231, P61812, P47992, O95750, P01570, P02649, P23946, P38484, P04085, P00738, Q9Y251,…
GO:0018193	peptidyl-amino acid modification	2.14903280568034e-10	5.08887711503752e-14	135	3633	792	41451	0.00%	0.00	Q96HF1, P35968, P29460, Q10471, P01241, Q16706, O60704, P01185, P01137, O43286, P30101, Q9NPF7, Q13724, P05107, Q8NI22, P01019, P61647, Q14697, Q14393, P07585, P07766, Q92611, P33908, P56704, P04004, P05019, Q9NR34, Q09327, Q9BV94, P08700, Q9BQ16, P01308, Q15389, P00740, P01588, Q9Y680, Q8TB73, O75462, P05112, Q9Y673, P21781, P41159, Q9UI42, P02790, P20809, O15460, P26885, P39656, P05231, Q9GZP0,…
GO:0007610	behavior	2.3794263773049e-10	5.63444560100615e-14	117	3633	650	41451	0.00%	0.00	O43529, Q9H251, P18428, P35968, P13500, P14138, Q14563, P01258, Q9UBU3, O60565, P01185, P01137, P02778, P24387, Q9NPF7, P13501, P06865, Q12913, O15123, P04233, P01178, P42127, Q13275, P02768, O94813, Q92752, P01019, O75093, P98155, P01275, P55089, P41594, P00797, P08709, Q7Z4H4, Q16568, P49767, O00585, P43220, Q9ULZ1, P56704, O43915, P54802, Q8N729, P36955, P80098, P13521, Q9BX67, P05305, Q8N135,…
GO:0050793	regulation of developmental process	2.50199791609034e-10	5.92469314726578e-14	256	3633	1840	41451	0.00%	0.00	Q96HF1, Q99616, Q92876, P35968, P01563, Q13873, P29460, Q9UJH8, Q14563, O95631, O14905, P09544, Q9UBU3, O60565, P23582, P01137, P02778, Q9P2N4, Q9HCJ2, Q9NPF7, Q9H1J7, O15123, P05107, P01178, P01574, O15031, O94813, P01019, Q96FE5, P12643, P25063, P02818, P02741, Q9BQB4, O95393, P02776, P16035, Q8N2Q7, Q16787, Q7Z4H4, Q16568, P07766, P43220, P56704, P80098, P05019, P10747, P11597, P05305, P08493,…
GO:0030574	collagen catabolic process	2.6138488752745e-10	6.18955452350106e-14	17	3633	23	41451	0.00%	0.00	Q92876, P03956, O15072, O95450, Q8WXS8, P45452, P08253, Q99542, P14780, P08254, P07478, Q9H306, Q9NRE1, P09238, P01034, P24347, P09237
GO:0051346	negative regulation of hydrolase activity	3.16698402063194e-10	7.49937016488738e-14	63	3633	260	41451	0.00%	0.00	Q96HF1, P02656, P19957, Q06033, P20742, P05543, O76096, P01185, Q6UXR4, P07093, P05154, P05155, P05231, P61812, P01011, P02652, Q9BY76, Q86U17, P26842, Q9UK55, P01019, P48357, P50454, P19823, P01034, P05121, P10646, Q99574, P11021, Q14624, P02654, Q9Y5C1, Q92932, P00995, Q99935, P04004, P0C7U0, P36955, Q96Q04, Q08629, P01009, Q8N474, P03973, Q16610, A8K2U0, P07225, Q9BQ16, A8MV23, P08185, P20155,…
GO:0010740	positive regulation of intracellular protein kinase cascade	3.21697401098849e-10	7.61774570444823e-14	87	3633	426	41451	0.00%	0.00	Q9UBD9, Q9UBV4, P35968, P29460, P50591, P10721, P01241, Q5T9L3, P01137, Q15848, P01236, Q9NPF7, P13501, Q9UMX5, Q12913, P60568, P04233, Q9NPH9, P16471, P01019, Q8WVQ1, P01275, Q9NSA1, Q10589, Q8N2Q7, P41594, P08709, Q8IU54, Q14393, O00585, P05019, P29322, Q9NYY1, P01127, Q16610, P08700, O14763, Q9NR96, P01308, O96014, Q15389, Q9NS68, P01588, P01579, O75462, P10147, Q6EIG7, P24593, P05112, P41159,…
GO:0071345	cellular response to cytokine stimulus	4.54614120503761e-10	1.07651934762908e-13	85	3633	414	41451	0.00%	0.00	Q9UBD9, Q01344, P01563, P13500, P29460, P10721, P01589, Q15848, P13501, P36222, P04233, P14780, Q02223, P01574, Q14114, O94813, P98155, P25063, P01567, P05014, P06340, P02776, Q92637, P09919, P30460, P05305, P30685, P30488, P26951, Q14213, P01889, P01566, O95998, P03989, P01569, P30466, Q9NS68, P30475, P30461, P01579, Q9P0W0, P19235, P10147, Q92626, Q14242, P41159, P04439, P02790, P05113, P05013,…
GO:0008283	cell proliferation	6.06349807812982e-10	1.43582715560735e-13	272	3633	2001	41451	0.00%	0.00	Q96HF1, Q13873, P29460, P50281, O95631, P09544, P02778, Q16627, P01236, Q9NPF7, P01574, P01019, P12643, Q9BQ08, P56704, Q9H3N1, Q9Y258, P05305, P04054, P08700, Q9HC57, Q14213, P01308, Q15389, P24592, O60258, Q99445, Q96RP3, Q15392, P01588, Q8IWU6, Q9P0W0, P22004, P02647, O75581, Q12794, P41159, P20809, P01225, Q9UNI1, P20366, P55773, P03950, P05231, P61812, O95750, Q92765, P02649, P20800, P07942,…
GO:0072378	blood coagulation, fibrin clot formation	6.5870959707292e-10	1.55981434305688e-13	16	3633	21	41451	0.00%	0.00	P07359, P00748, P01042, P05155, P00740, P03951, P02749, P03952, P00734, P04275, P00451, P42785, P10646, P01023, P00742, P08709
GO:0032940	secretion by cell	7.4725654044402e-10	1.7694921630216e-13	141	3633	854	41451	0.00%	0.00	P01563, P01215, Q9UBU3, P01185, P01137, P02778, P02675, P01042, P05155, P01178, P01019, P02776, Q8N2Q7, Q16568, Q14393, P43220, P05019, P09681, P05305, P04054, Q96KC8, P01308, P16109, Q96RP3, P09529, P02647, P08514, P02751, Q6EIG7, P05067, P21781, P54756, P41159, P20809, Q92824, P50897, P19883, P02775, Q9GZV9, Q8WVV5, P03950, P05231, P61812, P20800, P00451, P35225, Q9HCQ7, P04085, P05121, P01023,…
GO:0034367	macromolecular complex remodeling	8.16662863010481e-10	1.93384528299901e-13	18	3633	27	41451	0.00%	0.00	P06727, P02656, O95445, P04180, P11597, P14555, P02655, P11150, P04114, Q6Q788, P02652, P02649, P01019, Q13093, P02647, Q9Y5X9, P05164, P02654
GO:0034368	protein-lipid complex remodeling	8.16662863010481e-10	1.93384528299901e-13	18	3633	27	41451	0.00%	0.00	P06727, P02656, O95445, P04180, P11597, P14555, P02655, P11150, P04114, Q6Q788, P02652, P02649, P01019, Q13093, P02647, Q9Y5X9, P05164, P02654
GO:0034369	plasma lipoprotein particle remodeling	8.16662863010481e-10	1.93384528299901e-13	18	3633	27	41451	0.00%	0.00	P06727, P02656, O95445, P04180, P11597, P14555, P02655, P11150, P04114, Q6Q788, P02652, P02649, P01019, Q13093, P02647, Q9Y5X9, P05164, P02654
GO:0051050	positive regulation of transport	3.56979335003609e-09	8.45321655229952e-13	101	3633	550	41451	0.00%	0.00	Q96HF1, P26022, P29460, P14138, P22303, Q9UBU3, O60565, P01185, P01137, Q15848, P01042, Q9NPF7, P13501, Q9BXJ5, P60568, Q9NPH9, P01178, O15496, P01019, P01275, Q9NSA1, Q16568, P49767, O00585, P43220, Q9ULZ1, P56704, P04004, P05019, P09681, Q9NYK1, P05305, P04054, P02753, P01127, O95727, Q9NR96, P01308, Q86UU9, P20396, Q6Q788, Q15389, P05111, P10600, P01579, Q9P246, P09529, P10147, P27797, Q6EIG7,…
GO:0034097	response to cytokine stimulus	4.84887826504175e-09	1.14820702463693e-12	104	3633	576	41451	0.00%	0.00	Q9UBD9, Q01344, P01563, P13500, P29460, P10721, P13686, P02461, P07858, P01589, Q15848, P13501, P36222, P04233, P14780, Q99727, Q02223, P39877, P01574, Q14114, O94813, P98155, P25063, P01567, P05014, P06340, P02776, Q92637, P09919, O43915, P30460, P01009, P05305, P30685, P30488, P26951, Q14213, P01889, P01566, O95998, P51671, P03989, P01569, P30466, Q9NS68, P01588, P30475, P30461, P01579, Q9P0W0,…
GO:0050727	regulation of inflammatory response	4.89328364121671e-09	1.15872215041836e-12	51	3633	197	41451	0.00%	0.00	P18428, P29460, P13686, P01258, Q9UBU3, P20366, P01589, Q15848, Q9NPF7, P13501, P60568, P05155, P04062, P05231, P47992, P02765, P02649, P01019, P48740, P02735, Q13093, P23946, P01024, P05121, P01023, O00175, P01374, P36955, P41221, O00206, P10747, P00748, P14555, Q9NYK1, Q9NYY1, P30273, P78423, P28039, P11684, Q9NR96, P01308, P46695, Q9HBE4, O15455, P21754, P03952, P01008, P13725, P22301, P13671,…
GO:0051216	cartilage development	4.90064692435091e-09	1.1604657647054e-12	54	3633	216	41451	0.00%	0.00	Q96HF1, Q13253, P41159, P18075, P13942, Q15582, P20849, Q9UBU3, Q9NRC9, P56706, P23582, P01137, P45452, O00622, Q9H1J7, P02458, Q6UXX9, P22003, Q92765, P12645, P12107, O76093, Q70SY1, P12643, Q7Z5Y6, Q92896, P41221, Q9NPF2, P05305, P08493, Q9UK05, O00238, P08620, O14904, Q9NS15, P10767, P34820, O96014, P98160, P43026, Q12805, O00755, Q8IWU6, P12644, Q99217, P51884, P22004, Q9NZJ5, O75581, Q96PD4,…
GO:0072358	cardiovascular system development	5.80613268655984e-09	1.37488342092348e-12	161	3633	1046	41451	0.00%	0.00	Q96HF1, P35968, P50281, P02461, P09544, Q9UBU3, O60565, P02778, P00749, P25067, Q9H1J7, Q12913, Q8NI99, O15123, Q9NQ30, P01178, Q6UXH8, Q8WWQ8, P42892, O94813, P01019, P12643, P35555, O95393, P13611, P02776, Q7Z4H4, P56704, P05019, P05305, P08572, Q9UK05, Q16610, P10767, Q9NY15, Q15389, P28300, P16109, P58400, Q8IWU6, P19235, Q9NZ08, P02751, Q96PD4, O75581, Q9NR61, P08123, Q13253, Q00604, Q92824,…
GO:0072359	circulatory system development	5.80613268655984e-09	1.37488342092348e-12	161	3633	1046	41451	0.00%	0.00	Q96HF1, P35968, P50281, P02461, P09544, Q9UBU3, O60565, P02778, P00749, P25067, Q9H1J7, Q12913, Q8NI99, O15123, Q9NQ30, P01178, Q6UXH8, Q8WWQ8, P42892, O94813, P01019, P12643, P35555, O95393, P13611, P02776, Q7Z4H4, P56704, P05019, P05305, P08572, Q9UK05, Q16610, P10767, Q9NY15, Q15389, P28300, P16109, P58400, Q8IWU6, P19235, Q9NZ08, P02751, Q96PD4, O75581, Q9NR61, P08123, Q13253, Q00604, Q92824,…
GO:0007275	multicellular organismal development	1.06946318789515e-08	2.53247262111095e-12	632	3633	5604	41451	0.00%	0.00	Q9NS98, Q92876, P29460, P35052, Q14563, O95631, P01258, Q16706, P20849, P01215, P02778, Q9HCJ2, Q9NPF7, P06865, P05107, Q9NQ30, Q6UXH8, Q8NF37, P01574, O94813, P01019, P12643, Q16787, Q16568, Q9Y5E5, Q86UL3, Q96I82, P09681, P05305, Q8N135, P08572, P11117, Q9NY15, O43897, O60258, Q15392, Q9NS68, P05997, P16112, P02647, P02751, Q9P0M4, Q9NR61, Q13214, P08123, P41159, P20809, Q92824, Q9H293, O75631,…
GO:0052547	regulation of peptidase activity	1.13351822474642e-08	2.68415397761406e-12	65	3633	294	41451	0.00%	0.00	Q96HF1, Q06033, P50591, P20742, P05543, O76096, P01185, O00622, P05154, P05155, Q01955, P01011, Q86U17, P01574, P01019, P19823, P10646, Q14624, P00995, Q99935, P56704, P04004, P36955, P01009, P03973, Q16610, A8K2U0, O14763, Q9BQ16, P20155, Q8IW75, P02748, Q9UHG2, Q15392, P01008, Q14508, P19957, P29279, Q6UXR4, P07093, P05231, P26842, P50454, Q9UK55, Q9UKZ9, P01034, P05121, Q99574, P11021, Q08629,…
GO:0007597	blood coagulation, intrinsic pathway	1.41907426942564e-08	3.36034636378318e-12	14	3633	18	41451	0.00%	0.00	P07359, P03951, P00740, P02749, P00734, P03952, P00748, P00451, P04275, P42785, P01023, P01042, P00742, P05155
GO:0006664	glycolipid metabolic process	1.532532383869e-08	3.62901345931565e-12	28	3633	72	41451	0.00%	0.00	Q92185, Q8N5D6, Q8NDV1, P10721, P17900, O43173, Q9BVH7, Q9NPC4, Q92187, P06280, P06865, Q99999, Q969X2, P04062, Q9BYG0, Q00973, O15466, Q9UNP4, P07602, Q9Y274, O95461, P54317, P61647, P07686, P17050, Q9H4F1, Q92186, P54803
GO:0009311	oligosaccharide metabolic process	1.66205292916489e-08	3.9357161476791e-12	31	3633	87	41451	0.00%	0.00	Q9BT22, P17900, O43173, Q16706, Q9UQ53, O75752, Q9BVH7, P21217, Q92187, O60476, P00709, P35475, P06280, Q969X2, Q13724, Q9Y5Z6, Q01459, P10253, Q96JF0, Q9Y274, P61647, P07686, P17050, Q9BYC5, Q10469, Q96A11, Q96RP7, Q92186, Q9Y673, Q9UKM7, O43825
GO:0007167	enzyme linked receptor protein signaling pathway	1.76164968585474e-08	4.17155975812157e-12	157	3633	1026	41451	0.00%	0.00	Q96HF1, P35968, Q13873, P01241, P02461, Q8N907, Q9UKJ0, Q9UBU3, O60565, P23582, P01137, Q12913, O15123, P01019, Q96FE5, Q15198, P12643, P35555, Q9BQB4, O95393, Q9NSA1, O43921, P18509, P07766, P04004, P05019, Q86TH1, O14522, Q99988, Q9UK05, Q9HCT0, P01160, P10767, P01308, Q15389, O60258, O95841, Q8IWU6, P09529, P22004, P18065, Q96PD4, P52797, P05067, P21781, P08123, Q13253, P54756, P41159, Q92824,…
GO:0046427	positive regulation of JAK-STAT cascade	1.77715265219436e-08	4.20827054746474e-12	26	3633	63	41451	0.00%	0.00	Q9UBD9, P41159, P02790, P29460, P05019, P10721, P01241, Q9NYY1, P29459, P08700, P05113, P01236, Q9NPF7, P13501, P60568, P05231, Q9NPH9, P16471, P04141, P01588, P01019, P01579, O75462, P15018, P05112, Q8IU54
GO:0032879	regulation of localization	1.79077545045468e-08	4.24052912729027e-12	217	3633	1556	41451	0.00%	0.00	Q96HF1, P02656, P35968, P01563, Q13873, P29460, Q14563, O95631, Q9UBU3, O60565, P01185, P01137, P02778, P01042, Q9NPF7, P00749, Q9H1J7, Q12913, O15123, P01178, O94813, P01019, P12643, P02741, O95393, Q9NSA1, Q16787, Q16568, P43220, P56704, P04004, P80098, P05019, P09681, P11597, Q9Y258, P05305, P04054, Q13822, Q9UK05, Q96KC8, P01308, Q6Q788, Q15389, P16109, P58400, Q96RP3, P01588, Q8IWU6, P09529,…
GO:0030593	neutrophil chemotaxis	2.1473742926257e-08	5.08494978125906e-12	22	3633	46	41451	0.00%	0.00	O00585, P18428, P13500, P14138, Q9BX67, P05305, P04054, P30273, P78423, Q99731, Q9NPF7, P05107, P04233, P61812, P19876, P47992, P10145, O94813, P20800, P02735, P01579, P10147
GO:0030195	negative regulation of blood coagulation	2.18778321434744e-08	5.18063749549476e-12	21	3633	42	41451	0.00%	0.00	P00747, P07359, P04004, P00748, P05305, P01127, P07093, P01042, P00749, P03951, P02749, P02649, P03952, P00734, P04085, Q96IY4, P04196, P05121, P00750, P07204, P08697
GO:0016485	protein processing	2.34191588845883e-08	5.54562133189398e-12	43	3633	155	41451	0.00%	0.00	Q92876, Q92824, P01225, P50281, P01215, P07093, P01229, P05155, P03951, P42892, P02749, P48740, P05981, P01024, Q76LX8, P01233, Q9Y5Q5, P05121, Q9UKR3, P01023, P00797, Q92896, Q16549, P00748, P56730, O15072, O95450, P01138, P01222, Q9H9S5, P09958, O60344, Q9UHG2, Q15392, P03952, P05408, P05452, P01189, Q8NBP7, P00750, P08697, P13671, P09668
GO:0010646	regulation of cell communication	2.42744151432576e-08	5.74814471779721e-12	228	3633	1661	41451	0.00%	0.00	Q96HF1, Q92876, P35968, Q13873, P29460, P50591, P01241, P09544, Q8N907, Q5T9L3, Q9UBU3, O60565, P01185, P01137, P01236, Q9NPF7, Q9H1J7, Q12913, P01178, P42892, O94813, P01019, Q8WVQ1, P12643, P35555, Q9BQB4, O95393, Q9NSA1, P55089, Q8N2Q7, Q16568, Q14393, P07766, P43220, P56704, P04004, P05019, Q86TH1, P09681, P05305, Q9UK05, Q16610, P08700, P01308, O95998, Q15389, P58400, Q96RP3, Q9NS68, P01588,…
GO:0030282	bone mineralization	2.54786103427458e-08	6.03329631606579e-12	34	3633	104	41451	0.00%	0.00	P41159, Q13873, P18075, P02808, Q9GZV9, Q9BXN1, P01137, P45452, Q16832, P56705, Q6UXX9, Q9NRM1, P02765, P01270, P12643, P02818, P05019, P08493, Q9UNW1, O00238, Q16610, Q9NS15, O96014, P07307, P10600, P35556, Q9NP70, P12644, P21246, P05452, P22004, Q9NZJ5, P10147, O00744
GO:0001817	regulation of cytokine production	3.22011491446811e-08	7.62518331628727e-12	80	3633	409	41451	0.00%	0.00	P18428, P01563, P13500, P29460, P13686, Q9UBU3, P01137, Q15848, Q9NPF7, Q06643, P60568, P04233, Q8NEV9, Q9NPH9, P15248, P01574, P01019, Q96F46, P25063, P02776, P55089, Q8IU54, P07766, O43915, P10747, Q9NYK1, O95727, P11684, Q14213, P01889, Q9NR96, P01308, O96014, P05111, P10600, P01579, P01189, P09529, P02647, Q96PD4, Q6EIG7, Q8NET5, Q96RJ3, P05112, P41159, P29459, P01031, Q8WVV5, P04062, P61812,…
GO:0090092	regulation of transmembrane receptor protein serine/threonine kinase signaling pathway	3.67432200994945e-08	8.70073883483176e-12	44	3633	163	41451	0.00%	0.00	Q96HF1, Q13253, Q13873, P18075, P19883, Q8N907, O95813, O60565, Q9BXN1, P01137, O00622, Q8N8U9, Q6KF10, P08476, P12643, P35555, Q9BQB4, O95393, P11021, Q92896, Q92743, Q9GZX9, O94907, P41221, Q86TH1, P04628, Q9H2X0, Q9NPF2, Q9UK05, Q8N474, Q2TAL6, O15520, Q6X4U4, P09958, P10600, Q8N2S1, P35556, Q8IWU6, Q7Z4P5, P12644, P22004, Q14766, Q96PD4, P36896
GO:0071310	cellular response to organic substance	3.79473756137746e-08	8.98588103570321e-12	185	3633	1281	41451	0.00%	0.00	Q01344, P35968, P01563, Q13873, P29460, P01241, P02461, P09544, P01215, Q9UBU3, P01137, P01574, Q14114, O94813, Q96HE7, P12643, P25063, P05014, Q9BQB4, Q9NSA1, P02776, P12109, P00797, P21815, P04004, P30460, P05305, P04054, P08572, Q9HCT0, P30488, P10767, Q14213, P01889, P01566, P01308, O95998, O60258, P30466, Q96RP3, Q9NS68, Q8IWU6, P30461, P05997, Q9P0W0, P09529, P19235, P18065, Q92626, O75581,…
GO:0001775	cell activation	4.41211243288387e-08	1.04478153750506e-11	152	3633	995	41451	0.00%	0.00	P01563, P29460, P02461, P01137, P02675, P01042, Q9NPF7, Q12913, P05155, P01574, Q14114, P01019, P25063, P02776, Q14393, P07766, P56704, P05019, Q9H3N1, P10747, P05305, Q14213, P01308, P19827, P16109, Q9P0W0, P02647, P02751, P08514, P18065, P05067, P05112, P08123, P41159, P20809, P02775, P20366, P07093, Q8WVV5, P56705, P39656, Q8N8U9, P05231, P61812, P47992, Q9HBE5, P02649, P20800, P35225, P00451,…
GO:0031640	killing of cells of other organism	4.69660636696415e-08	1.11214926994178e-11	16	3633	25	41451	0.00%	0.00	P59666, P81172, P49913, P12838, P15515, P81605, Q01523, P22749, P11226, P59665, P15516, P02768, P02748, P01579, O14791, Q01524
GO:0050654	chondroitin sulfate proteoglycan metabolic process	5.34265887479118e-08	1.26513352469599e-11	18	3633	32	41451	0.00%	0.00	Q86X52, P05019, Q9NPF2, Q9UL01, Q9BQ16, Q92563, Q8N6G5, Q9NS84, Q63HQ2, Q8NET6, Q8NCH0, Q8TB73, Q9NRB3, Q7LGC8, P21810, Q8TDX6, Q9NRR1, P07585
GO:0071825	protein-lipid complex subunit organization	5.34265887479118e-08	1.26513352469599e-11	18	3633	32	41451	0.00%	0.00	P06727, P02656, O95445, P04180, P11597, P14555, P02655, P11150, P04114, Q6Q788, P02652, P02649, P01019, Q13093, P02647, Q9Y5X9, P05164, P02654
GO:0071827	plasma lipoprotein particle organization	5.34265887479118e-08	1.26513352469599e-11	18	3633	32	41451	0.00%	0.00	P06727, P02656, O95445, P04180, P11597, P14555, P02655, P11150, P04114, Q6Q788, P02652, P02649, P01019, Q13093, P02647, Q9Y5X9, P05164, P02654
GO:0009620	response to fungus	6.54153765538626e-08	1.54902620302777e-11	19	3633	36	41451	0.00%	0.00	P26022, P59666, P81172, P12838, Q9BZP6, O00206, P15515, P81605, Q9H293, Q01523, P22749, P01137, P59665, P22352, P15516, P04196, Q6EIG7, P05164, Q01524
GO:0002526	acute inflammatory response	6.59142376790681e-08	1.56083915886972e-11	37	3633	124	41451	0.00%	0.00	P35542, P18428, P60022, P02743, Q06141, P20366, Q6UW15, P13501, P05155, P05231, P01011, P02652, P02765, P48740, P02735, P00451, P01024, P02741, P01023, P02786, P19652, Q14624, P00748, P01009, P11226, P30273, P01308, P03952, P21754, P00734, P02763, P02751, P13725, Q9GZX6, P08697, P13671, P05112
GO:0000271	polysaccharide biosynthetic process	7.14644178835196e-08	1.6922665849756e-11	35	3633	113	41451	0.00%	0.00	Q86X52, Q9BT22, Q06430, Q9H1B5, P52848, Q9BXJ5, O43505, Q8N6G5, Q8IYK4, Q7Z7M9, Q5T4B2, P01270, Q9NS84, O94766, Q7Z7M8, Q9GZX3, Q93063, P05019, Q9NPF2, Q96L58, Q16394, Q9UL01, Q8NBJ5, O94923, Q9UBV7, Q7LGA3, P01308, P01344, Q15389, Q8NET6, Q9NRB3, P06213, Q7LGC8, Q86Y38, Q8TDX6
GO:0016042	lipid catabolic process	1.34197196428728e-07	3.17776927370892e-11	64	3633	303	41451	0.00%	0.00	P02656, Q17RR3, Q96AD5, Q15848, P06280, P06865, Q9NZK7, Q02509, O15496, P39877, A2RUU4, P54803, Q9NZ20, Q9Y5C1, P22760, P04118, Q5VYY2, P07098, P04054, Q13822, Q9UNK4, P08842, P01308, P11150, Q6Q788, Q92484, P16233, Q9BX93, P07686, Q9BZM1, P19835, P06727, Q9BZM2, P41159, P50897, P17900, Q8WWY8, Q9GZV9, P04062, P38571, P02652, P02649, O95470, Q8NCC3, Q8IV08, P54317, Q13093, Q5R387, P17050, Q8NBQ5,…
GO:0016049	cell growth	1.45213396391423e-07	3.4386312193091e-11	89	3633	490	41451	0.00%	0.00	Q96HF1, Q13873, O00559, P13232, Q14563, O95631, O60565, P01185, P01137, P10451, O00622, Q12913, P60568, Q9NQ30, P14780, P15248, P04278, Q13275, O94813, Q92752, P01019, O75093, P05981, O95393, O95388, P55089, P56704, Q92743, Q96I82, P08922, Q8WX77, P05305, O75610, Q9UK05, Q16288, P01160, P01127, O75356, Q9HC57, P01308, O96014, P24592, Q32P28, Q9NPF0, P10600, P07478, O76076, Q8TB73, P18065, P08833,…
GO:0006004	fucose metabolic process	1.51685381528009e-07	3.59188684650743e-11	14	3633	20	41451	0.00%	0.00	P51993, Q6P4F1, Q9Y231, Q9BTY2, Q6Y288, P19526, Q10981, Q9BYC5, P22083, Q9H488, Q11130, P04066, Q11128, Q9Y2G5
GO:0050832	defense response to fungus	1.51685381528009e-07	3.59188684650743e-11	14	3633	20	41451	0.00%	0.00	P59666, P81172, P15516, P12838, P15515, P81605, Q01523, P22749, P04196, P01137, Q6EIG7, Q01524, P05164, P59665
GO:0001816	cytokine production	1.60721229225982e-07	3.80585435060341e-11	85	3633	460	41451	0.00%	0.00	P18428, P01563, P13500, P29460, P13686, Q9UBU3, P01137, Q15848, Q9NPF7, Q06643, P60568, P04233, Q8NEV9, Q9NPH9, P15248, P01574, P01019, Q96F46, P25063, P02776, P55089, Q8IU54, P07766, O43915, Q9UHD0, P10747, Q9NYK1, P04054, O95727, P11684, Q14213, P01889, Q9NR96, P01308, O96014, P05111, P10600, P01579, P01189, P09529, P02647, Q96PD4, Q6EIG7, Q8NET5, Q96RJ3, P05112, P41159, Q92824, P29459, P01031,…
GO:0050819	negative regulation of coagulation	1.70772155925154e-07	4.04385877161152e-11	22	3633	50	41451	0.00%	0.00	P00747, P07359, P04004, P00748, P05305, P01127, P07093, P01042, P00749, Q8IZT8, P03951, P02749, P02649, P03952, P00734, P04085, Q96IY4, P05121, P04196, P00750, P07204, P08697
GO:0051604	protein maturation	1.95085296545721e-07	4.61959025682502e-11	45	3633	177	41451	0.00%	0.00	Q92876, Q92824, P01225, P50281, P01215, P20933, P07093, P01229, P05155, P03951, P42892, P02749, P48740, P05981, P01024, Q76LX8, P01233, Q9Y5Q5, P05121, Q9UKR3, P01023, P00797, Q92896, Q16549, P00748, P56730, O15072, O95450, P01138, P01222, Q9H9S5, P09958, O60344, Q9UHG2, Q15392, P03952, P05408, P05452, P01189, Q8NBP7, P00750, P27797, P08697, P13671, P09668
GO:0051047	positive regulation of secretion	2.49832811975781e-07	5.9160031251665e-11	57	3633	258	41451	0.00%	0.00	P41159, P14138, P22303, Q9UBU3, P20366, P01185, P01137, P05113, P16860, P01042, P01031, P48645, P60568, P03950, P05231, P61812, Q9NPH9, P01178, O15496, P08571, P08476, P20800, P01019, P02735, P35225, P01275, P48546, Q16568, P49767, P43220, Q9ULZ1, Q9BZP6, P41221, Q9GZZ8, P09681, P05305, P04054, P02753, P30273, O95727, Q969E3, Q99731, P01308, Q86UU9, P39905, P20396, P10600, P05111, P21754, P01579,…
GO:0009888	tissue development	2.58516397681039e-07	6.12162911866064e-11	222	3633	1647	41451	0.00%	0.00	Q96HF1, P78562, Q92876, P35968, Q13873, P15515, Q14563, O95631, P02461, O14905, P09544, P20849, Q9UBU3, Q9NRC9, O60565, P23582, P01137, P00749, Q06643, Q9H1J7, P01019, Q16790, P12643, P25063, P02818, O95
