# Supplementary material for: Genome-Scale Modeling of the Protein Secretory Machinery in Yeast
Source: PLoS One. 2013 May 7;8(5):e63284. doi: 10.1371/journal.pone.0063284 (PMC3646752; doi:10.1371/journal.pone.0063284)
Supplement: Table S14 — The descendent metabolic cost for each of the secretory client’s production in steady state cell-1 hour-1. (XLSX) [file pone.0063284.s018.xlsx]

## Sheet: Sheet1
Table S14-The descendent metabolic cost for each of the secretory clients production in steady state per cell per hour.
SGD ID	GTP[cytoplasm]	SGD ID	ATP[Endoplasmic reticulum]	SGD ID	ATP[Cytoplasm]	SGD ID	FADH[Endoplasmic reticulum]	SGD ID	GDP-man[Golgi]	SGD ID	Dol-pp-GlcNAc(2)man(9)-Glc(3)[Endoplasmic reticulum]	SGD ID	Acyl-PI-GlcN-(man)4-(EtNP)3[Endoplasmic reticulum]	SGD ID	Dol-pp-Man[Endoplasmic reticulum]	SGD ID	UB[Cytoplasm]
S000001956	2.38476e+06	S000001956	2.38476e+06	S000001956	4.76951e+06	S000004912	66074.6	S000005235	44365.1	S000004100	142244	S000001956	476951	S000004100	94829.1	S000001956	2.38476e+06
S000004100	663804	S000003571	505413	S000003571	1.01083e+06	S000004924	25955.5	S000004100	2.32331e+06	S000004074	57274.1	S000004100	47414.6	S000003694	7519.4	S000003571	505413
S000003571	606495	S000002440	273693	S000002440	547386	S000003892	4956.18	S000003514	621143	S000004912	52859.7	S000006429	12606.6	S000003764	0.6	S000002440	273693
S000002440	218954	S000004100	237073	S000004100	474146	S000001267	3614.47	S000004912	607887	S000002462	52546.2	S000000271	10668.5	S000005235	0	S000004100	237073
S000000619	148518	S000000619	185647	S000000619	371295	S000000054	2856.1	S000006429	579904	S000004924	37079.3	S000003421	8856.43	S000000619	0	S000000619	185647
S000004912	92504.5	S000003292	115662	S000003292	231324	S000001846	871.084	S000003421	407396	S000004828	29604.6	S000004828	4934.09	S000002103	0	S000003292	115662
S000002103	89658.6	S000002103	112073	S000002103	224147	S000006044	755.563	S000005010	340255	S000003514	27006.2	S000004924	3707.93	S000001168	0	S000002103	112073
S000003292	69397.2	S000004473	77531.1	S000004473	155062	S000001231	504.533	S000004511	295596	S000003421	26569.3	S000002462	3503.08	S000005492	0	S000004473	77531.1
S000000271	53342.3	S000001084	69938.5	S000004912	145364	S000000786	481.138	S000004516	233925	S000004405	23095.6	S000005390	3503.08	S000005977	0	S000001084	69938.5
S000006429	50426.4	S000003514	67515.6	S000001084	139877	S000002739	469.333	S000000245	233052	S000005390	21018.5	S000003707	1657.62	S000004610	0	S000003514	67515.6
S000004473	46518.7	S000004912	66074.6	S000003514	135031	S000005448	457.453	S000004828	226968	S000002629	20487.2	S000004110	1630.85	S000005371	0	S000004912	66074.6
S000001084	41963.1	S000006429	63033	S000006429	126066	S000004481	325.104	S000000728	205655	S000000245	20265.4	S000004851	884.572	S000000553	0	S000006429	63033
S000003514	40509.4	S000000363	62907.3	S000000363	125815	S000005814	249.127	S000001009	201471	S000003707	18233.8	S000001529	775.114	S000002930	0	S000000363	62907.3
S000000363	37744.4	S000000271	53342.3	S000000271	106685	S000006241	233.024	S000003694	184225	S000003539	17833.5	S000001579	617.784	S000002144	0	S000000271	53342.3
S000003421	35425.7	S000003421	44282.2	S000003421	88564.3	S000001277	201.638	S000002891	179749	S000003728	17515.4	S000002484	489	S000087203	0	S000003421	44282.2
S000004594	34840.8	S000004594	43551	S000004594	87102.1	S000001174	140.518	S000003338	176137	S000004110	16308.5	S000005244	445.495	S000028739	0	S000004594	43551
S000003694	30077.6	S000003168	40226.1	S000003168	80452.2	S000004047	21.4686	S000004924	170565	S000003722	13675.2	S000004184	206.505	S000001257	0	S000003168	40226.1
S000002996	27145.6	S000000005	39407.8	S000000005	78815.5	S000004335	2.1	S000000366	169971	S000000113	12970.5	S000005266	186.853	S000003707	0	S000000005	39407.8
S000003338	26803.5	S000005010	36984.3	S000005010	73968.6	S000004599	1.5	S000003539	164068	S000004511	12852	S000004608	186.853	S000001478	0	S000005010	36984.3
S000007236	24488	S000002996	33932	S000002996	67864	S000002464	0.9	S000002462	161142	S000006429	12606.6	S000000813	186.853	S000004335	0	S000002996	33932
S000003168	24135.7	S000004511	32130	S000004511	64260.1	S000000548	0.6	S000003728	161142	S000005235	12538	S000002551	161.523	S000001529	0	S000004511	32130
S000000005	23644.7	S000002129	31013.1	S000002129	62026.1	S000005182	0.6	S000005390	161142	S000003338	11487.2	S000002930	71.4035	S000004851	0	S000002129	31013.1
S000005010	22190.6	S000007236	30609.9	S000007236	61219.9	S000003764	0.6	S000003722	157265	S000003006	11388.3	S000001168	0.6	S000000282	0	S000007236	30609.9
S000006131	21198	S000005780	26573.9	S000005780	53147.9	S000005327	0.6	S000004921	144681	S000000490	11373.2	S000002144	0.6	S000000084	0	S000005780	26573.9
S000004516	20341.3	S000004516	25426.6	S000004516	50853.2	S000006075	0.6	S000002629	134630	S000002842	11285.4	S000001257	0.6	S000004924	0	S000004516	25426.6
S000000245	20265.4	S000000245	25331.7	S000000245	50663.4	S000004070	0.3	S000003006	130965	S000003675	9592.66	S000005492	0.3	S000005266	0	S000000245	25331.7
S000004828	19736.4	S000004828	24670.5	S000004828	49340.9	S000005235	0	S000000768	119805	S000001529	9301.37	S000005977	0.3	S000002551	0	S000004828	24670.5
S000002129	18607.8	S000000728	22353.8	S000000728	44707.7	S000000619	0	S000003171	118034	S000000728	8941.53	S000004610	0.3	S000002462	0	S000000728	22353.8
S000000753	17747	S000001009	21899.1	S000001009	43798.1	S000002103	0	S000003892	113992	S000001009	8759.63	S000005371	0.3	S000004184	0	S000001009	21899.1
S000003695	17519.3	S000003695	21899.1	S000003695	43798.1	S000001168	0	S000000375	107926	S000004851	7961.15	S000000553	0.3	S000004110	0	S000003695	21899.1
S000005780	15944.4	S000002891	19537.9	S000002891	39075.9	S000005492	0	S000002842	103826	S000000768	7813.37	S000087203	0.3	S000004111	0	S000002891	19537.9
S000003687	15038.8	S000003338	19145.4	S000003338	38290.7	S000005977	0	S000000113	99440.2	S000003171	7697.87	S000028739	0.3	S000005343	0	S000003338	19145.4
S000004827	14868.5	S000003687	18798.5	S000003687	37597	S000004610	0	S000003836	98770.8	S000001853	7656.77	S000001478	0.3	S000005911	0	S000003687	18798.5
S000004924	14831.7	S000003694	18798.5	S000003694	37597	S000005371	0	S000004056	94453.5	S000003892	7434.27	S000004335	0.3	S000004405	0	S000003694	18798.5
S000002629	14633.7	S000004924	18539.6	S000004924	37079.3	S000000553	0	S000000219	92809	S000000557	7397.92	S000000282	0.3	S000003363	0	S000004924	18539.6
S000002281	14248.1	S000000366	18475.1	S000000366	36950.2	S000002930	0	S000006343	91499.9	S000005010	7396.86	S000000084	0.3	S000004667	0	S000000366	18475.1
S000002462	14012.3	S000003539	17833.5	S000003539	35667	S000002144	0	S000003675	88252.4	S000000366	7390.04	S000004111	0.3	S000002684	0	S000003539	17833.5
S000005390	14012.3	S000006131	17665	S000006131	35330	S000087203	0	S000004276	87607.3	S000001267	7228.95	S000000766	0.3	S000000987	0	S000006131	17665
S000002760	13331.5	S000002462	17515.4	S000002462	35030.8	S000028739	0	S000003511	85361	S000000054	7140.24	S000003911	0.3	S000001409	0	S000002462	17515.4
S000001009	13139.4	S000003728	17515.4	S000003728	35030.8	S000001257	0	S000005309	85041.6	S000006363	7140.24	S000001186	0.3	S000004204	0	S000003728	17515.4
S000004511	12852	S000005390	17515.4	S000005390	35030.8	S000003707	0	S000001267	83132.9	S000001424	6959.03	S000000685	0.3	S000001703	0	S000005390	17515.4
S000005421	12362.3	S000003722	17094	S000003722	34188	S000001478	0	S000006148	79981.7	S000000550	6806.02	S000002942	0.3	S000005908	0	S000003722	17094
S000002891	11722.8	S000004921	15726.2	S000004921	31452.3	S000001529	0	S000003707	76250.5	S000000219	6052.76	S000005909	0.3	S000000610	0	S000004921	15726.2
S000000366	11085.1	S000002629	14633.7	S000002629	29267.4	S000004851	0	S000005625	75634.1	S000005680	5845.95	S000001254	0.3	S000000623	0	S000002629	14633.7
S000003722	10256.4	S000003006	14235.3	S000003006	28470.7	S000000282	0	S000004110	75019.1	S000004516	5085.32	S000005515	0.3	S000002381	0	S000003006	14235.3
S000002670	10176.2	S000005615	13138.2	S000005615	26276.4	S000000084	0	S000000557	68060.8	S000000375	4692.42	S000003614	0.3	S000002440	0	S000005615	13138.2
S000000947	10049.4	S000000768	13022.3	S000000768	26044.6	S000005266	0	S000000054	65690.2	S000004608	4671.32	S000003764	0.3	S000006353	0	S000000768	13022.3
S000000490	9951.53	S000003171	12829.8	S000003171	25659.6	S000002551	0	S000006363	65690.2	S000005391	4356.04	S000000952	0.3	S000004594	0	S000003171	12829.8
S000006128	9745.08	S000004757	12676.4	S000004757	25352.9	S000002462	0	S000004583	65542.9	S000004056	4106.67	S000001810	0.3	S000005444	0	S000004757	12676.4
S000002927	9725.08	S000000753	12676.4	S000000753	25352.9	S000004184	0	S000000490	65395.8	S000004662	4085.06	S000005536	0.3	S000005223	0	S000000753	12676.4
S000004921	9435.7	S000000947	12561.8	S000000947	25123.6	S000004110	0	S000005974	60452.9	S000000297	4004.81	S000003912	0.3	S000004406	0	S000000947	12561.8
S000000615	9354.97	S000004827	12390.4	S000004827	24780.9	S000004111	0	S000004405	59022.2	S000002891	3907.59	S000005271	0.3	S000005575	0	S000004827	12390.4
S000000728	8941.53	S000003892	12390.4	S000003892	24780.9	S000005343	0	S000004291	59022.2	S000004993	3765.34	S000005910	0.3	S000001534	0	S000003892	12390.4
S000006343	7956.51	S000001637	12371.4	S000001637	24742.9	S000005911	0	S000004074	50665.5	S000003694	3759.7	S000000059	0.3	S000006013	0	S000001637	12371.4
S000005615	7882.92	S000006167	11768.4	S000006167	23536.9	S000004405	0	S000001143	47816.1	S000005309	3697.46	S000001458	0.3	S000004516	0	S000006167	11768.4
S000000768	7813.37	S000000375	11731.1	S000000375	23462.1	S000003363	0	S000005680	44819	S000002779	3658.94	S000006051	0.3	S000002497	0	S000000375	11731.1
S000000491	7730.35	S000000615	11693.7	S000000615	23387.4	S000004667	0	S000001461	43453.8	S000006148	3477.47	S000001273	0.3	S000003258	0	S000000615	11693.7
S000003171	7697.87	S000002842	11285.4	S000002842	22570.8	S000002684	0	S000004993	43301.5	S000002484	3423	S000005535	0.3	S000001036	0	S000002842	11285.4
S000004757	7605.86	S000001548	10808.7	S000001548	21617.4	S000000987	0	S000000664	42231.2	S000002995	3403.01	S000004030	0.3	S000005138	0	S000001548	10808.7
S000001637	7422.87	S000000113	10808.7	S000000113	21617.4	S000001409	0	S000002779	42077.8	S000004921	3145.23	S000004032	0.3	S000001853	0	S000000113	10808.7
S000003539	7133.41	S000003836	10736	S000003836	21471.9	S000004204	0	S000002990	41462.6	S000004583	2849.69	S000005740	0.3	S000003246	0	S000003836	10736
S000006167	7061.06	S000003022	10663.3	S000003022	21326.7	S000001703	0	S000004851	40690.3	S000006295	2841.77	S000005327	0.3	S000005227	0	S000003022	10663.3
S000003728	7006.15	S000000727	10663.3	S000000727	21326.7	S000005908	0	S000001347	39914.4	S000003246	2777.69	S000005235	0	S000001843	0	S000000727	10663.3
S000003707	6630.48	S000004056	10266.7	S000004056	20533.4	S000000610	0	S000001853	39134.6	S000000664	2754.21	S000000619	0	S000004964	0	S000004056	10266.7
S000004110	6523.4	S000002281	10177.2	S000002281	20354.4	S000000623	0	S000002995	39134.6	S000002990	2704.08	S000002103	0	S000004978	0	S000002281	10177.2
S000001548	6485.23	S000000219	10087.9	S000000219	20175.9	S000002381	0	S000000550	39134.6	S000005863	2689.36	S000005343	0	S000002828	0	S000000219	10087.9
S000000113	6485.23	S000006343	9945.64	S000006343	19891.3	S000002440	0	S000001529	35655.2	S000005974	2628.39	S000005911	0	S000001402	0	S000006343	9945.64
S000003836	6441.57	S000002371	9768.66	S000002371	19537.3	S000006353	0	S000005391	33396.3	S000004291	2566.18	S000004405	0	S000004662	0	S000002371	9768.66
S000003022	6398	S000000491	9662.94	S000000491	19325.9	S000004594	0	S000004813	32580.2	S000003836	2147.19	S000003363	0	S000004324	0	S000000491	9662.94
S000000727	6398	S000003675	9592.66	S000003675	19185.3	S000005444	0	S000001276	31923.7	S000000803	2141.24	S000004667	0	S000004074	0	S000003675	9592.66
S000002692	6379.77	S000004276	9522.54	S000004276	19045.1	S000005223	0	S000005489	26192.9	S000004813	2124.8	S000002684	0	S000005534	0	S000004276	9522.54
S000000403	6284.47	S000002760	9522.54	S000002760	19045.1	S000004406	0	S000000314	26019.8	S000001143	2078.96	S000000987	0	S000006097	0	S000002760	9522.54
S000000219	6052.76	S000002653	9417.65	S000002653	18835.3	S000005575	0	S000001224	24975	S000006343	1989.13	S000001409	0	S000004010	0	S000002653	9417.65
S000002204	5955.26	S000003511	9278.37	S000003511	18556.7	S000001534	0	S000001385	24799.8	S000004276	1904.51	S000004204	0	S000001808	0	S000003511	9278.37
S000002371	5861.19	S000005309	9243.65	S000005309	18487.3	S000006013	0	S000000803	24624.2	S000001402	1899.02	S000001703	0	S000006131	0	S000005309	9243.65
S000003675	5755.59	S000001267	9036.18	S000001267	18072.4	S000004516	0	S000001424	24624.2	S000003511	1855.67	S000005908	0	S000002757	0	S000001267	9036.18
S000003609	5727.4	S000005421	8830.18	S000005421	17660.4	S000002497	0	S000001231	23208.5	S000001277	1814.74	S000000610	0	S000004568	0	S000005421	8830.18
S000004276	5713.52	S000006148	8693.66	S000006148	17387.3	S000003258	0	S000004406	22851.2	S000001347	1735.41	S000000623	0	S000006139	0	S000006148	8693.66
S000003006	5694.13	S000004730	8625.65	S000004730	17251.3	S000001036	0	S000002484	22494	S000000314	1696.94	S000002381	0	S000005814	0	S000004730	8625.65
S000002653	5650.59	S000003770	8321.67	S000003770	16643.3	S000005138	0	S000000786	22132.3	S000005625	1644.22	S000002440	0	S000000548	0	S000003770	8321.67
S000003511	5567.02	S000003707	8288.1	S000003707	16576.2	S000001853	0	S000002463	22042.1	S000001301	1603.84	S000006353	0	S000002712	0	S000003707	8288.1
S000005974	5256.77	S000005625	8221.09	S000005625	16442.2	S000003246	0	S000002739	21589.3	S000002551	1453.71	S000004594	0	S000002926	0	S000005625	8221.09
S000004730	5175.39	S000004110	8154.26	S000004110	16308.5	S000005227	0	S000005244	20492.8	S000001276	1387.99	S000005444	0	S000003571	0	S000004110	8154.26
S000004405	5132.36	S000006128	8120.9	S000006128	16241.8	S000001843	0	S000003246	18253.4	S000005927	1250.72	S000005223	0	S000005863	0	S000006128	8120.9
S000003770	4993	S000002927	8104.24	S000002927	16208.5	S000004964	0	S000003226	16138.1	S000004290	1209.83	S000004406	0	S000001556	0	S000002927	8104.24
S000003892	4956.18	S000001289	7855.58	S000002670	15991.2	S000004978	0	S000000297	15351.8	S000001409	1180.45	S000005575	0	S000001247	0	S000001289	7855.58
S000005625	4932.66	S000000403	7855.58	S000001289	15711.2	S000002828	0	S000001301	14755.3	S000003708	1080.78	S000001534	0	S000004827	0	S000000403	7855.58
S000001289	4713.35	S000000557	7397.92	S000000403	15711.2	S000001402	0	S000004662	14454.8	S000004406	993.531	S000006013	0	S000005391	0	S000000557	7397.92
S000000375	4692.42	S000004519	7333.23	S000000490	15638.1	S000004662	0	S000005630	13747.4	S000004781	983.705	S000004516	0	S000001637	0	S000004519	7333.23
S000006342	4584.13	S000002670	7268.73	S000000557	14795.8	S000004324	0	S000004204	12303.9	S000001461	944.648	S000002497	0	S000004894	0	S000002670	7268.73
S000000391	4555.03	S000001305	7236.54	S000004519	14666.5	S000004074	0	S000006295	11883.8	S000002739	938.666	S000003258	0	S000003609	0	S000001305	7236.54
S000002842	4514.17	S000000054	7140.24	S000001305	14473.1	S000005534	0	S000005814	11459.9	S000005630	896.569	S000001036	0	S000000604	0	S000000054	7140.24
S000005270	4478.52	S000006363	7140.24	S000000054	14280.5	S000006097	0	S000005863	11246.4	S000003375	843.11	S000005138	0	S000000240	0	S000006363	7140.24
S000004074	4405.7	S000004583	7124.23	S000006363	14280.5	S000004010	0	S000003708	9943.14	S000001607	810.876	S000001853	0	S000006142	0	S000004583	7124.23
S000004519	4399.94	S000000490	7108.23	S000004583	14248.5	S000001808	0	S000004184	9499.25	S000004204	802.43	S000003246	0	S000000049	0	S000000490	7108.23
S000001305	4341.92	S000002507	6806.38	S000002507	13612.8	S000006131	0	S000001277	9275.35	S000003991	802.412	S000005227	0	S000003107	0	S000002507	6806.38
S000006363	4284.15	S000005974	6570.96	S000005974	13141.9	S000002757	0	S000004290	9275.35	S000001247	786.964	S000001843	0	S000003598	0	S000005974	6570.96
S000004480	4221.03	S000004405	6415.45	S000004405	12830.9	S000004568	0	S000005534	9162.89	S000000433	785.439	S000004964	0	S000004669	0	S000004405	6415.45
S000004056	4106.67	S000005570	6415.45	S000005570	12830.9	S000006139	0	S000001409	9050.08	S000002757	669.651	S000004978	0	S000005611	0	S000005570	6415.45
S000002507	4083.83	S000004291	6415.45	S000004291	12830.9	S000002712	0	S000001247	9050.08	S000002864	625.358	S000002828	0	S000004757	0	S000004291	6415.45
S000005489	3985.87	S000005611	6046.98	S000005611	12094	S000002926	0	S000004781	9050.08	S000000049	621.173	S000001402	0	S000000640	0	S000005611	6046.98
S000005680	3897.3	S000006342	5730.16	S000006342	11460.3	S000003571	0	S000003373	8595.23	S000006044	604.45	S000004662	0	S000003770	0	S000006342	5730.16
S000005235	3857.83	S000004074	5507.12	S000004074	11014.2	S000005863	0	S000004608	8595.23	S000005489	569.411	S000004324	0	S000004519	0	S000004074	5507.12
S000003281	3857.83	S000005313	5330.68	S000005313	10661.4	S000001556	0	S000002551	7430.05	S000001224	542.934	S000004074	0	S000005313	0	S000005313	5330.68
S000005570	3849.27	S000003719	5213.56	S000003719	10427.1	S000001247	0	S000002864	7191.62	S000001385	539.125	S000005534	0	S000005163	0	S000003719	5213.56
S000004291	3849.27	S000001143	5197.4	S000001143	10394.8	S000004827	0	S000005927	7191.62	S000000604	508.167	S000006097	0	S000004451	0	S000001143	5197.4
S000005309	3697.46	S000002775	5132.67	S000002775	10265.3	S000005391	0	S000006044	6951.18	S000001231	504.533	S000004010	0	S000000405	0	S000002775	5132.67
S000001040	3685.61	S000001278	5018.88	S000001278	10037.8	S000001637	0	S000003375	6463.85	S000002930	499.825	S000001808	0	S000002819	0	S000001278	5018.88
S000005391	3630.03	S000002279	4888.04	S000002279	9776.08	S000004894	0	S000001174	6463.85	S000005814	498.255	S000006131	0	S000005618	0	S000002279	4888.04
S000005611	3628.19	S000005680	4871.63	S000005680	9743.25	S000003609	0	S000004974	6216.71	S000000786	481.138	S000002757	0	S000001690	0	S000005680	4871.63
S000001267	3614.47	S000005235	4822.29	S000005235	9644.58	S000000604	0	S000001607	6216.71	S000002463	479.176	S000004568	0	S000002822	0	S000005235	4822.29
S000002990	3605.44	S000003281	4822.29	S000003281	9644.58	S000000240	0	S000000049	5714.79	S000005244	445.495	S000006139	0	S000000846	0	S000003281	4822.29
S000002700	3595.77	S000002176	4789.33	S000002176	9578.66	S000006142	0	S000004978	5459.67	S000003373	373.706	S000005814	0	S000028423	0	S000002176	4789.33
S000004851	3538.29	S000003609	4772.83	S000003609	9545.66	S000000049	0	S000001402	5459.67	S000006097	356.066	S000000548	0	S000003022	0	S000003609	4772.83
S000006148	3477.47	S000001461	4723.24	S000001461	9446.48	S000003107	0	S000006097	5459.67	S000003226	350.829	S000002712	0	S000004532	0	S000001461	4723.24
S000001347	3470.81	S000004993	4706.68	S000004993	9413.36	S000003598	0	S000000604	4675.13	S000003598	310.699	S000002926	0	S000000040	0	S000004993	4706.68
S000002168	3450.09	S000001040	4607.01	S000002204	9358.27	S000004669	0	S000002381	4541.24	S000001121	310.699	S000003571	0	S000004396	0	S000001040	4607.01
S000001853	3403.01	S000000664	4590.35	S000001040	9214.03	S000005611	0	S000001435	4406.35	S000001435	287.37	S000005863	0	S000004078	0	S000000664	4590.35
S000000786	3367.97	S000000640	4573.67	S000000664	9180.7	S000004757	0	S000002860	4406.35	S000002860	287.37	S000001556	0	S000002988	0	S000000640	4573.67
S000004568	3325.92	S000002779	4573.67	S000000640	9147.34	S000000640	0	S000005782	4133.36	S000001556	287.273	S000001247	0	S000003110	0	S000002779	4573.67
S000005313	3198.41	S000002692	4556.98	S000002779	9147.34	S000003770	0	S000003758	3855.76	S000005847	285.614	S000004827	0	S000003774	0	S000002692	4556.98
S000003719	3128.13	S000004532	4506.8	S000002692	9113.95	S000004519	0	S000003598	3573.04	S000001174	281.037	S000005391	0	S000002842	0	S000004532	4506.8
S000001529	3100.46	S000002990	4506.8	S000004532	9013.6	S000005313	0	S000001121	3573.04	S000005782	269.567	S000001637	0	S000000208	0	S000002990	4506.8
S000001579	3088.92	S000004851	4422.86	S000002990	9013.6	S000005163	0	S000002930	3284.56	S000003758	251.463	S000004894	0	S000002845	0	S000004851	4422.86
S000002775	3079.6	S000001846	4355.42	S000004851	8845.72	S000004451	0	S000000433	3284.56	S000004184	206.505	S000003609	0	S000000447	0	S000001846	4355.42
S000006083	3034.19	S000001347	4338.52	S000001846	8710.84	S000000405	0	S000005847	3284.56	S000005534	199.193	S000000604	0	S000004540	0	S000001347	4338.52
S000001278	3011.33	S000001853	4253.76	S000001347	8677.03	S000002819	0	S000003991	2839.3	S000005350	192.9	S000000240	0	S000004442	0	S000001853	4253.76
S000000557	2959.17	S000002230	4253.76	S000001853	8507.52	S000005618	0	S000002757	2053.6	S000004974	135.146	S000006142	0	S000005373	0	S000002230	4253.76
S000002279	2932.83	S000002995	4253.76	S000002230	8507.52	S000001690	0	S000004442	2053.6	S000004978	118.689	S000000049	0	S000006165	0	S000002995	4253.76
S000002176	2873.6	S000000550	4253.76	S000002995	8507.52	S000002822	0	S000001556	1887.79	S000002381	98.7226	S000003107	0	S000001352	0	S000000550	4253.76
S000000054	2856.1	S000002204	4253.76	S000000550	8507.52	S000000846	0	S000004047	987.554	S000004442	89.2867	S000003598	0	S000003879	0	S000002204	4253.76
S000004583	2849.69	S000005542	4065.77	S000005542	8131.54	S000028423	0	S000005350	887.34	S000004047	21.4686	S000004669	0	S000005570	0	S000005542	4065.77
S000005358	2847.29	S000005373	3996.87	S000005373	7993.74	S000003022	0	S000003764	14.7	S000006230	8.4	S000005611	0	S000001938	0	S000005373	3996.87
S000002439	2790.27	S000004815	3962.31	S000004815	7924.62	S000004532	0	S000005492	13.8	S000004077	6.9	S000004757	0	S000001648	0	S000004815	3962.31
S000000640	2744.2	S000001529	3875.57	S000001529	7751.14	S000000040	0	S000004610	13.8	S000004610	5.7	S000000640	0	S000002613	0	S000001529	3875.57
S000002779	2744.2	S000002391	3647.7	S000002391	7295.41	S000004396	0	S000005371	13.8	S000005271	5.7	S000003770	0	S000004481	0	S000002391	3647.7
S000004532	2704.08	S000005391	3630.03	S000005391	7260.06	S000004078	0	S000000553	13.8	S000006321	5.4	S000004519	0	S000005363	0	S000005391	3630.03
S000001846	2613.25	S000005358	3559.11	S000005358	7118.23	S000002988	0	S000002144	13.8	S000000059	4.8	S000005313	0	S000003633	0	S000005358	3559.11
S000002230	2552.26	S000004813	3541.33	S000004813	7082.66	S000003110	0	S000087203	13.8	S000003665	4.5	S000005163	0	S000004730	0	S000004813	3541.33
S000005542	2439.46	S000007523	3541.33	S000007523	7082.66	S000003774	0	S000028739	13.8	S000000685	4.5	S000004451	0	S000004887	0	S000007523	3541.33
S000005373	2398.12	S000003805	3505.69	S000003805	7011.38	S000002842	0	S000001257	13.8	S000005371	4.2	S000000405	0	S000000116	0	S000003805	3505.69
S000002463	2395.88	S000002439	3487.84	S000002439	6975.68	S000000208	0	S000001478	13.8	S000000084	4.2	S000002819	0	S000005780	0	S000002439	3487.84
S000004815	2377.39	S000001276	3469.96	S000001276	6939.93	S000002845	0	S000004335	13.8	S000005223	4.2	S000005618	0	S000002371	0	S000001276	3469.96
S000005448	2287.26	S000002988	3380.23	S000002988	6760.47	S000000447	0	S000000282	13.8	S000005104	4.2	S000001690	0	S000005675	0	S000002988	3380.23
S000005678	2262.59	S000000391	3253.59	S000000391	6507.19	S000004540	0	S000000084	13.8	S000000282	3.9	S000002822	0	S000002533	0	S000000391	3253.59
S000002391	2188.62	S000005270	3198.94	S000005270	6397.88	S000004442	0	S000004111	13.8	S000001194	3.9	S000000846	0	S000001301	0	S000005270	3198.94
S000007523	2124.8	S000001579	3088.92	S000001579	6177.84	S000005373	0	S000005343	13.8	S000000278	3.6	S000028423	0	S000003337	0	S000001579	3088.92
S000003805	2103.42	S000004480	3015.02	S000004480	6030.05	S000006165	0	S000005911	13.8	S000001810	3.6	S000003022	0	S000001548	0	S000004480	3015.02
S000001276	2081.98	S000002700	2996.48	S000002700	5992.96	S000001352	0	S000001703	13.8	S000001478	3.3	S000004532	0	S000004643	0	S000002700	2996.48
S000001143	2078.96	S000005489	2847.05	S000005489	5694.11	S000003879	0	S000005908	13.8	S000004111	3.3	S000000040	0	S000002230	0	S000005489	2847.05
S000002988	2028.14	S000000314	2828.24	S000000314	5656.47	S000005570	0	S000000610	13.8	S000003764	3.3	S000004396	0	S000002978	0	S000000314	2828.24
S000004406	1987.06	S000005678	2828.24	S000005678	5656.47	S000001938	0	S000005444	13.8	S000004599	2.7	S000004078	0	S000001182	0	S000005678	2828.24
S000002484	1956	S000004568	2771.6	S000004568	5543.2	S000001648	0	S000005223	13.8	S000000766	2.7	S000002988	0	S000001285	0	S000004568	2771.6
S000004010	1955.87	S000001224	2714.67	S000001224	5429.34	S000002613	0	S000005575	13.8	S000004957	2.4	S000003110	0	S000005090	0	S000001224	2714.67
S000001461	1889.3	S000001385	2695.63	S000002168	5421.57	S000005363	0	S000002497	13.8	S000005916	2.4	S000003774	0	S000007651	0	S000001385	2695.63
S000004993	1882.67	S000000803	2676.55	S000001385	5391.25	S000003633	0	S000004964	13.8	S000001070	2.4	S000002842	0	S000004599	0	S000000803	2676.55
S000000664	1836.14	S000001424	2676.55	S000000803	5353.1	S000004730	0	S000002828	13.8	S000001020	2.1	S000000208	0	S000002927	0	S000001424	2676.55
S000005244	1781.98	S000001231	2522.67	S000001424	5353.1	S000004887	0	S000004324	13.8	S000000641	2.1	S000002845	0	S000002464	0	S000001231	2522.67
S000001623	1765.96	S000004406	2483.83	S000000786	5292.52	S000000116	0	S000000548	13.8	S000005343	1.8	S000000447	0	S000002700	0	S000004406	2483.83
S000002995	1701.5	S000002168	2464.35	S000001231	5045.33	S000005780	0	S000002712	13.8	S000004540	1.8	S000004540	0	S000001461	0	S000002168	2464.35
S000000550	1701.5	S000002484	2445	S000004406	4967.66	S000002371	0	S000002926	13.8	S000001648	1.8	S000004442	0	S000004056	0	S000002484	2445
S000001224	1628.8	S000004010	2444.84	S000002484	4890	S000005675	0	S000000240	13.8	S000001254	1.8	S000005373	0	S000004993	0	S000004010	2444.84
S000001385	1617.38	S000005971	2444.84	S000004010	4889.67	S000002533	0	S000006142	13.8	S000028739	1.5	S000006165	0	S000000314	0	S000005971	2444.84
S000000803	1605.93	S000000786	2405.69	S000005971	4889.67	S000001301	0	S000003107	13.8	S000001703	1.5	S000001352	0	S000006148	0	S000000786	2405.69
S000001424	1605.93	S000002463	2395.88	S000002463	4791.76	S000003337	0	S000004669	13.8	S000000610	1.5	S000003879	0	S000000762	0	S000002463	2395.88
S000003246	1587.25	S000002739	2346.67	S000002739	4693.33	S000001548	0	S000004078	13.8	S000002828	1.5	S000005570	0	S000000664	0	S000002739	2346.67
S000003708	1513.09	S000005448	2287.26	S000005448	4574.53	S000004643	0	S000000208	13.8	S000000548	1.5	S000001938	0	S000001143	0	S000005448	2287.26
S000005814	1494.76	S000003337	2227.47	S000003337	4454.95	S000002230	0	S000004540	13.8	S000002926	1.5	S000001648	0	S000000054	0	S000003337	2227.47
S000002410	1470.87	S000005244	2227.47	S000005244	4454.95	S000002978	0	S000006165	13.8	S000004197	1.5	S000002613	0	S000002995	0	S000005244	2227.47
S000005971	1466.9	S000001623	2207.45	S000001623	4414.91	S000001182	0	S000001648	13.8	S000002365	1.5	S000004481	0	S000000550	0	S000001623	2207.45
S000004733	1437.19	S000006083	2167.28	S000006083	4334.55	S000001285	0	S000005675	13.8	S000000742	1.5	S000005363	0	S000001289	0	S000006083	2167.28
S000004813	1416.53	S000003246	1984.07	S000003246	3968.13	S000005090	0	S000001285	13.8	S000005515	1.5	S000003633	0	S000003168	0	S000003246	1984.07
S000004290	1411.47	S000002410	1838.58	S000002410	3677.17	S000007651	0	S000004599	13.8	S000005535	1.5	S000004730	0	S000001267	0	S000002410	1838.58
S000001647	1404	S000004733	1796.49	S000004733	3592.98	S000002927	0	S000002464	13.8	S000087203	1.2	S000004887	0	S000001937	0	S000004733	1796.49
S000003337	1336.48	S000001647	1755	S000001647	3510	S000002700	0	S000001152	13.8	S000005908	1.2	S000000116	0	S000002129	0	S000001647	1755
S000004662	1256.94	S000003226	1754.15	S000003226	3508.29	S000001461	0	S000004197	13.8	S000004669	1.2	S000005780	0	S000000005	0	S000003226	1754.15
S000005863	1222.44	S000003879	1732.88	S000003879	3465.75	S000004056	0	S000003495	13.8	S000001769	1.2	S000002371	0	S000002176	0	S000003879	1732.88
S000003194	1213.08	S000000297	1668.67	S000000297	3337.34	S000004993	0	S000000663	13.8	S000005182	1.2	S000005675	0	S000005542	0	S000000297	1668.67
S000005630	1195.43	S000004481	1625.52	S000004481	3251.04	S000000314	0	S000004957	13.8	S000006283	1.2	S000002533	0	S000001152	0	S000004481	1625.52
S000004822	1177.7	S000002613	1603.84	S000002613	3207.68	S000006148	0	S000004073	13.8	S000005892	1.2	S000001301	0	S000002970	0	S000002613	1603.84
S000000314	1131.29	S000001301	1603.84	S000001301	3207.68	S000000762	0	S000001522	13.8	S000005342	1.2	S000003337	0	S000006241	0	S000001301	1603.84
S000006155	1130.66	S000004662	1571.18	S000004662	3142.35	S000000664	0	S000004502	13.8	S000005740	1.2	S000001548	0	S000001231	0	S000004662	1571.18
S000004756	1106.13	S000003194	1516.35	S000003194	3032.7	S000001143	0	S000001769	13.8	S000005773	1.2	S000004643	0	S000002739	0	S000003194	1516.35
S000005927	1094.38	S000005630	1494.28	S000005630	2988.56	S000002995	0	S000005182	13.8	S000000553	0.9	S000002230	0	S000004511	0	S000005630	1494.28
S000004204	1069.91	S000004822	1472.13	S000004822	2944.26	S000000550	0	S000006283	13.8	S000003107	0.9	S000002978	0	S000004197	0	S000004822	1472.13
S000006044	1057.79	S000004756	1382.66	S000004756	2765.33	S000001289	0	S000002365	13.8	S000001285	0.9	S000001182	0	S000000727	0	S000004756	1382.66
S000003226	1052.49	S000004204	1337.38	S000004204	2674.77	S000003168	0	S000005892	13.8	S000002464	0.9	S000001285	0	S000001121	0	S000004204	1337.38
S000003879	1039.73	S000006295	1291.72	S000006295	2583.43	S000001937	0	S000003531	13.8	S000003495	0.9	S000005090	0	S000004913	0	S000006295	1291.72
S000000411	1020.88	S000004396	1268.73	S000004396	2537.46	S000002129	0	S000000278	13.8	S000000663	0.9	S000007651	0	S000002653	0	S000004396	1268.73
S000002158	1014.98	S000002158	1268.73	S000002158	2537.46	S000000005	0	S000002912	13.8	S000003531	0.9	S000004599	0	S000005971	0	S000002158	1268.73
S000001231	1009.07	S000005814	1245.64	S000005814	2491.27	S000002176	0	S000006321	13.8	S000003575	0.9	S000002927	0	S000003892	0	S000005814	1245.64
S000000297	1001.2	S000001018	1245.64	S000001018	2491.27	S000005542	0	S000000657	13.8	S000006361	0.9	S000002464	0	S000003006	0	S000001018	1245.64
S000001018	996.509	S000005863	1222.44	S000005863	2444.87	S000001152	0	S000003575	13.8	S000005465	0.9	S000002700	0	S000003539	0	S000005863	1222.44
S000001247	983.705	S000002845	1128.49	S000002845	2256.98	S000002970	0	S000005086	13.8	S000002942	0.9	S000001461	0	S000000728	0	S000002845	1128.49
S000001174	983.629	S000003708	1080.78	S000003708	2161.55	S000004511	0	S000001692	13.8	S000004030	0.9	S000004056	0	S000000557	0	S000003708	1080.78
S000002613	962.303	S000000409	1056.72	S000000409	2113.44	S000004197	0	S000003665	13.8	S000004032	0.9	S000004993	0	S000004813	0	S000000409	1056.72
S000001607	946.021	S000004184	1032.53	S000004184	2065.05	S000000727	0	S000002377	13.8	S000004145	0.9	S000000314	0	S000003495	0	S000004184	1032.53
S000002739	938.666	S000001277	1008.19	S000001277	2016.38	S000001121	0	S000001854	13.8	S000004147	0.9	S000006148	0	S000005309	0	S000001277	1008.19
S000000813	934.265	S000004290	1008.19	S000004290	2016.38	S000004913	0	S000006231	13.8	S000004148	0.9	S000000762	0	S000000375	0	S000004290	1008.19
S000000409	845.377	S000005534	995.967	S000005534	1991.93	S000002653	0	S000000665	13.8	S000004150	0.9	S000000664	0	S000000663	0	S000005534	995.967
S000004184	826.022	S000001409	983.705	S000001409	1967.41	S000005971	0	S000001020	13.8	S000003974	0.9	S000001143	0	S000001278	0	S000001409	983.705
S000001277	806.552	S000001247	983.705	S000001247	1967.41	S000003006	0	S000005349	13.8	S000002212	0.9	S000000054	0	S000003728	0	S000001247	983.705
S000005534	796.773	S000004781	983.705	S000004781	1967.41	S000003539	0	S000028526	13.8	S000001245	0.9	S000002995	0	S000004957	0	S000004781	983.705
S000001409	786.964	S000005266	934.265	S000005266	1868.53	S000000728	0	S000006361	13.8	S000005492	0.6	S000000550	0	S000004473	0	S000005266	934.265
S000004396	761.237	S000003373	934.265	S000003373	1868.53	S000000557	0	S000001194	13.8	S000002144	0.6	S000001289	0	S000004583	0	S000003373	934.265
S000005266	747.412	S000004608	934.265	S000004608	1868.53	S000004813	0	S000005465	13.8	S000001257	0.6	S000003168	0	S000002279	0	S000004608	934.265
S000003373	747.412	S000000813	934.265	S000000813	1868.53	S000003495	0	S000004077	13.8	S000005444	0.6	S000001267	0	S000006295	0	S000000813	934.265
S000004608	747.412	S000001352	909.297	S000001352	1818.59	S000005309	0	S000005342	13.8	S000005575	0.6	S000001937	0	S000000274	0	S000001352	909.297
S000005344	711.433	S000004877	884.157	S000004877	1768.31	S000000375	0	S000000742	13.8	S000002497	0.6	S000002129	0	S000004877	0	S000004877	884.157
S000002845	677.093	S000002551	807.614	S000006044	1662.24	S000000663	0	S000005716	13.8	S000004324	0.6	S000000005	0	S000004815	0	S000002551	807.614
S000002860	670.531	S000003094	807.614	S000002551	1615.23	S000001278	0	S000028529	13.8	S000000240	0.6	S000002176	0	S000000363	0	S000003094	807.614
S000004481	650.209	S000003773	807.614	S000003094	1615.23	S000003728	0	S000005916	13.8	S000006142	0.6	S000005542	0	S000003292	0	S000003773	807.614
S000002551	646.091	S000006155	807.614	S000003773	1615.23	S000004957	0	S000000766	13.8	S000000208	0.6	S000001152	0	S000001305	0	S000006155	807.614
S000003094	646.091	S000002864	781.698	S000006155	1615.23	S000004473	0	S000000685	13.8	S000005675	0.6	S000002970	0	S000001084	0	S000002864	781.698
S000003773	646.091	S000005927	781.698	S000002864	1563.4	S000004583	0	S000002942	13.8	S000004073	0.6	S000006241	0	S000002391	0	S000005927	781.698
S000001301	641.536	S000006044	755.563	S000005927	1563.4	S000002279	0	S000005909	13.8	S000000657	0.6	S000001231	0	S000000209	0	S000006044	755.563
S000004781	590.223	S000002978	729.198	S000001174	1545.7	S000006295	0	S000001254	13.8	S000002377	0.6	S000002739	0	S000007523	0	S000002978	729.198
S000003375	562.074	S000000411	729.198	S000002978	1458.4	S000000274	0	S000005515	13.8	S000001854	0.6	S000004511	0	S000000433	0	S000000411	729.198
S000001352	545.578	S000003375	702.592	S000000411	1458.4	S000004877	0	S000000952	13.8	S000006231	0.6	S000004197	0	S000002629	0	S000003375	702.592
S000004974	540.584	S000001174	702.592	S000003375	1405.18	S000004815	0	S000001810	13.8	S000000952	0.6	S000000727	0	S000005448	0	S000001174	702.592
S000004877	530.494	S000004974	675.73	S000004974	1351.46	S000000363	0	S000005271	13.8	S000001458	0.6	S000001121	0	S000002463	0	S000004974	675.73
S000006295	516.686	S000001607	675.73	S000001607	1351.46	S000003292	0	S000000059	13.8	S000001813	0.6	S000004913	0	S000006128	0	S000001607	675.73
S000004978	474.754	S000000049	621.173	S000000049	1242.35	S000001305	0	S000001458	13.8	S000005745	0.6	S000002653	0	S000000730	0	S000000049	621.173
S000001402	474.754	S000004978	593.443	S000004978	1186.89	S000001084	0	S000001273	13.8	S000004999	0.6	S000005971	0	S000005615	0	S000004978	593.443
S000006097	474.754	S000001402	593.443	S000001402	1186.89	S000002391	0	S000005535	13.8	S000006075	0.6	S000003892	0	S000002864	0	S000001402	593.443
S000002864	469.019	S000006097	593.443	S000006097	1186.89	S000000209	0	S000004030	13.8	S000004335	0.3	S000003006	0	S000004073	0	S000006097	593.443
S000002978	437.519	S000000846	565.382	S000000846	1130.76	S000007523	0	S000004032	13.8	S000005911	0.3	S000003539	0	S000003805	0	S000000846	565.382
S000003991	432.068	S000000604	508.167	S000000604	1016.33	S000000433	0	S000005740	13.8	S000004964	0.3	S000000728	0	S000004781	0	S000000604	508.167
S000001350	408.895	S000000274	508.167	S000000274	1016.33	S000002629	0	S000005327	13.8	S000002712	0.3	S000000557	0	S000001522	0	S000000274	508.167
S000000365	408.895	S000001099	508.167	S000001099	1016.33	S000002463	0	S000005773	13.8	S000004078	0.3	S000004813	0	S000000915	0	S000001099	508.167
S000001099	406.533	S000005344	508.167	S000005344	1016.33	S000006128	0	S000005104	13.8	S000006165	0.3	S000003495	0	S000005605	0	S000005344	508.167
S000002381	394.89	S000002381	493.613	S000002381	987.226	S000000730	0	S000004145	13.8	S000001152	0.3	S000005309	0	S000004906	0	S000002381	493.613
S000005782	359.423	S000001435	478.951	S000001435	957.901	S000005615	0	S000004147	13.8	S000001522	0.3	S000000375	0	S000002775	0	S000001435	478.951
S000000433	357.018	S000002860	478.951	S000002860	957.901	S000002864	0	S000004148	13.8	S000004502	0.3	S000000663	0	S000002911	0	S000002860	478.951
S000000846	339.229	S000002911	449.279	S000002911	898.557	S000004073	0	S000004150	13.8	S000002912	0.3	S000001278	0	S000006167	0	S000002911	449.279
S000005264	310.699	S000005782	449.279	S000005782	898.557	S000003805	0	S000000641	13.8	S000005086	0.3	S000003728	0	S000003541	0	S000005782	449.279
S000000274	304.9	S000003758	419.105	S000003758	838.21	S000004781	0	S000003974	13.8	S000001692	0.3	S000004957	0	S000001517	0	S000003758	419.105
S000001435	287.37	S000003598	388.374	S000003598	776.748	S000001522	0	S000002212	13.8	S000000665	0.3	S000004473	0	S000002507	0	S000003598	388.374
S000002930	285.614	S000006241	388.374	S000006241	776.748	S000000915	0	S000004024	13.8	S000005349	0.3	S000004583	0	S000004502	0	S000006241	388.374
S000002911	269.567	S000001121	388.374	S000001121	776.748	S000005605	0	S000000497	13.8	S000028526	0.3	S000002279	0	S000000768	0	S000001121	388.374
S000003758	251.463	S000005264	388.374	S000005264	776.748	S000004906	0	S000000574	13.8	S000005716	0.3	S000006295	0	S000005847	0	S000005264	388.374
S000000049	248.469	S000002930	357.018	S000002930	714.035	S000002775	0	S000001813	13.8	S000028529	0.3	S000000274	0	S000002891	0	S000002930	357.018
S000000405	214.211	S000000405	357.018	S000000405	714.035	S000002911	0	S000000445	13.8	S000005909	0.3	S000004877	0	S000006363	0	S000000405	357.018
S000003541	214.211	S000000433	357.018	S000000433	714.035	S000006167	0	S000001070	13.8	S000001273	0.3	S000004815	0	S000005625	0	S000000433	357.018
S000005847	214.211	S000003541	357.018	S000003541	714.035	S000003541	0	S000005745	13.8	S000004024	0.3	S000000363	0	S000001769	0	S000003541	357.018
S000003630	206.577	S000005847	357.018	S000005847	714.035	S000001517	0	S000004999	13.8	S000000497	0.3	S000003292	0	S000000803	0	S000005847	357.018
S000001556	205.195	S000003991	308.62	S000003991	617.24	S000002507	0	S000001245	13.8	S000000574	0.3	S000001305	0	S000000219	0	S000003991	308.62
S000000604	203.267	S000001350	292.068	S000001350	584.135	S000004502	0	S000006230	13.8	S000000445	0.3	S000001084	0	S000003226	0	S000001350	292.068
S000000511	178.573	S000000365	292.068	S000000365	584.135	S000000768	0	S000006075	13.8	S000000619	0	S000002391	0	S000001276	0	S000000365	292.068
S000003598	155.35	S000003630	258.222	S000003630	516.443	S000005847	0	S000000619	0	S000002103	0	S000000209	0	S000003675	0	S000003630	258.222
S000006241	155.35	S000002757	223.217	S000002757	446.434	S000002891	0	S000002103	0	S000001168	0	S000007523	0	S000004070	0	S000002757	223.217
S000001121	155.35	S000004442	223.217	S000004442	446.434	S000006363	0	S000001168	0	S000005977	0	S000000433	0	S000001846	0	S000004442	223.217
S000002757	89.2867	S000000511	223.217	S000000511	446.434	S000005625	0	S000005977	0	S000005266	0	S000002629	0	S000003836	0	S000000511	223.217
S000004442	89.2867	S000001556	205.195	S000001556	410.39	S000001769	0	S000005266	0	S000003363	0	S000005448	0	S000003719	0	S000001556	205.195
S000004047	85.8742	S000004047	107.343	S000004047	214.686	S000000803	0	S000003363	0	S000004667	0	S000002463	0	S000001224	0	S000004047	107.343
S000005350	57.87	S000005350	96.45	S000005350	192.9	S000000219	0	S000004667	0	S000002684	0	S000006128	0	S000003722	0	S000005350	96.45
S000003764	2.7	S000001168	1.5	S000005161	3.3	S000003226	0	S000002684	0	S000000987	0	S000000730	0	S000003171	0	S000001168	1.5
S000005327	2.4	S000005492	1.5	S000001245	3.3	S000001276	0	S000000987	0	S000000623	0	S000005615	0	S000005182	0	S000005492	1.5
S000003595	2.1	S000005977	1.5	S000006230	3.3	S000003675	0	S000000623	0	S000002440	0	S000002864	0	S000006283	0	S000005977	1.5
S000003974	2.1	S000004610	1.5	S000006075	3.3	S000003836	0	S000002440	0	S000006353	0	S000004073	0	S000000113	0	S000004610	1.5
S000000185	2.1	S000005371	1.5	S000001168	3	S000003719	0	S000006353	0	S000004594	0	S000003805	0	S000001435	0	S000005371	1.5
S000000921	2.1	S000000553	1.5	S000005492	3	S000001224	0	S000004594	0	S000001534	0	S000004781	0	S000003758	0	S000000553	1.5
S000004834	2.1	S000002144	1.5	S000005977	3	S000003722	0	S000001534	0	S000006013	0	S000001522	0	S000001009	0	S000002144	1.5
S000002212	2.1	S000087203	1.5	S000004610	3	S000003171	0	S000006013	0	S000003258	0	S000000915	0	S000001424	0	S000087203	1.5
S000004024	2.1	S000028739	1.5	S000005371	3	S000006283	0	S000003258	0	S000001036	0	S000005605	0	S000002365	0	S000028739	1.5
S000028508	2.1	S000001257	1.5	S000000553	3	S000000113	0	S000001036	0	S000005138	0	S000004906	0	S000002774	0	S000001257	1.5
S000000497	2.1	S000001478	1.5	S000002144	3	S000001435	0	S000005138	0	S000005227	0	S000002775	0	S000001908	0	S000001478	1.5
S000000574	2.1	S000004335	1.5	S000087203	3	S000003758	0	S000005227	0	S000001843	0	S000002911	0	S000005892	0	S000004335	1.5
S000001813	2.1	S000000282	1.5	S000028739	3	S000001009	0	S000001843	0	S000004010	0	S000006167	0	S000006405	0	S000000282	1.5
S000000445	2.1	S000000084	1.5	S000001257	3	S000001424	0	S000004010	0	S000001808	0	S000003541	0	S000001832	0	S000000084	1.5
S000002339	2.1	S000004111	1.5	S000001478	3	S000002365	0	S000001808	0	S000006131	0	S000001517	0	S000001702	0	S000004111	1.5
S000005379	2.1	S000005343	1.5	S000004335	3	S000002774	0	S000006131	0	S000004568	0	S000002507	0	S000005556	0	S000005343	1.5
S000001658	2.1	S000005911	1.5	S000000282	3	S000001908	0	S000004568	0	S000006139	0	S000004502	0	S000003531	0	S000005911	1.5
S000001420	2.1	S000003363	1.5	S000000084	3	S000005892	0	S000006139	0	S000003571	0	S000000768	0	S000003867	0	S000003363	1.5
S000001070	2.1	S000004667	1.5	S000004111	3	S000006405	0	S000003571	0	S000004827	0	S000005847	0	S000000245	0	S000004667	1.5
S000005745	2.1	S000002684	1.5	S000005343	3	S000001832	0	S000004827	0	S000001637	0	S000002891	0	S000000244	0	S000002684	1.5
S000004999	2.1	S000000987	1.5	S000005911	3	S000001702	0	S000001637	0	S000004894	0	S000006363	0	S000000947	0	S000000987	1.5
S000005161	2.1	S000001703	1.5	S000003363	3	S000005556	0	S000004894	0	S000003609	0	S000005625	0	S000005997	0	S000001703	1.5
S000001245	2.1	S000005908	1.5	S000004667	3	S000003531	0	S000003609	0	S000005611	0	S000001769	0	S000006110	0	S000005908	1.5
S000006230	2.1	S000000610	1.5	S000002684	3	S000003867	0	S000005611	0	S000004757	0	S000000803	0	S000003574	0	S000000610	1.5
S000006075	2.1	S000000623	1.5	S000000987	3	S000000245	0	S000004757	0	S000000640	0	S000000219	0	S000003630	0	S000000623	1.5
S000006139	1.8	S000006353	1.5	S000001703	3	S000000244	0	S000000640	0	S000003770	0	S000003226	0	S000000278	0	S000006353	1.5
S000000548	1.8	S000005444	1.5	S000005908	3	S000000947	0	S000003770	0	S000004519	0	S000001276	0	S000003194	0	S000005444	1.5
S000004599	1.8	S000005223	1.5	S000000610	3	S000005997	0	S000004519	0	S000005313	0	S000003675	0	S000001299	0	S000005223	1.5
S000002464	1.8	S000005575	1.5	S000000623	3	S000006110	0	S000005313	0	S000005163	0	S000004070	0	S000003114	0	S000005575	1.5
S000002712	1.5	S000001534	1.5	S000006353	3	S000003574	0	S000005163	0	S000004451	0	S000001846	0	S000003281	0	S000001534	1.5
S000002926	1.5	S000006013	1.5	S000005444	3	S000003630	0	S000004451	0	S000000405	0	S000003836	0	S000003094	0	S000006013	1.5
S000003911	1.5	S000002497	1.5	S000005223	3	S000000278	0	S000000405	0	S000002819	0	S000003719	0	S000002912	0	S000002497	1.5
S000001186	1.5	S000003258	1.5	S000005575	3	S000003194	0	S000002819	0	S000005618	0	S000001224	0	S000005978	0	S000003258	1.5
S000003614	1.5	S000001036	1.5	S000001534	3	S000001299	0	S000005618	0	S000001690	0	S000003722	0	S000000074	0	S000001036	1.5
S000005536	1.5	S000005138	1.5	S000006013	3	S000003114	0	S000001690	0	S000002822	0	S000003171	0	S000000423	0	S000005138	1.5
S000003912	1.5	S000005227	1.5	S000002497	3	S000003281	0	S000002822	0	S000000846	0	S000005182	0	S000000491	0	S000005227	1.5
S000005910	1.5	S000001843	1.5	S000003258	3	S000003094	0	S000000846	0	S000028423	0	S000006283	0	S000028818	0	S000001843	1.5
S000006051	1.5	S000004964	1.5	S000001036	3	S000002912	0	S000028423	0	S000003022	0	S000000113	0	S000000508	0	S000004964	1.5
S000001168	1.2	S000002828	1.5	S000005138	3	S000005978	0	S000003022	0	S000004532	0	S000001435	0	S000002425	0	S000002828	1.5
S000005492	1.2	S000004324	1.5	S000005227	3	S000000074	0	S000004532	0	S000000040	0	S000003758	0	S000028653	0	S000004324	1.5
S000005977	1.2	S000001808	1.5	S000001843	3	S000000423	0	S000000040	0	S000004396	0	S000001009	0	S000001018	0	S000001808	1.5
S000004610	1.2	S000006139	1.5	S000004964	3	S000000491	0	S000004396	0	S000002988	0	S000001424	0	S000001087	0	S000006139	1.5
S000005371	1.2	S000000548	1.5	S000002828	3	S000028818	0	S000002988	0	S000003110	0	S000002365	0	S000001120	0	S000000548	1.5
S000000553	1.2	S000002712	1.5	S000004324	3	S000000508	0	S000003110	0	S000003774	0	S000002774	0	S000113587	0	S000002712	1.5
S000002144	1.2	S000002926	1.5	S000001808	3	S000002425	0	S000003774	0	S000002845	0	S000001908	0	S000001291	0	S000002926	1.5
S000087203	1.2	S000004894	1.5	S000006139	3	S000028653	0	S000002845	0	S000000447	0	S000005892	0	S000003565	0	S000004894	1.5
S000028739	1.2	S000000240	1.5	S000000548	3	S000001018	0	S000000447	0	S000005373	0	S000006405	0	S000003654	0	S000000240	1.5
S000001257	1.2	S000006142	1.5	S000002712	3	S000001087	0	S000005373	0	S000001352	0	S000001832	0	S000003668	0	S000006142	1.5
S000001478	1.2	S000003107	1.5	S000002926	3	S000001120	0	S000001352	0	S000003879	0	S000001702	0	S000003976	0	S000003107	1.5
S000004335	1.2	S000004669	1.5	S000004894	3	S000113587	0	S000003879	0	S000005570	0	S000005556	0	S000004799	0	S000004669	1.5
S000000282	1.2	S000005163	1.5	S000000240	3	S000001291	0	S000005570	0	S000001938	0	S000003531	0	S000004822	0	S000005163	1.5
S000000084	1.2	S000004451	1.5	S000006142	3	S000003565	0	S000001938	0	S000002613	0	S000003867	0	S000028710	0	S000004451	1.5
S000004111	1.2	S000002819	1.5	S000003107	3	S000003654	0	S000002613	0	S000004481	0	S000000245	0	S000005522	0	S000002819	1.5
S000005343	1.2	S000005618	1.5	S000004669	3	S000003668	0	S000004481	0	S000005363	0	S000000244	0	S000006321	0	S000005618	1.5
S000005911	1.2	S000001690	1.5	S000005163	3	S000003976	0	S000005363	0	S000003633	0	S000000947	0	S000028515	0	S000001690	1.5
S000003363	1.2	S000002822	1.5	S000004451	3	S000004799	0	S000003633	0	S000004730	0	S000005997	0	S000004120	0	S000002822	1.5
S000004667	1.2	S000028423	1.5	S000002819	3	S000004822	0	S000004730	0	S000004887	0	S000006110	0	S000002512	0	S000028423	1.5
S000002684	1.2	S000000040	1.5	S000005618	3	S000028710	0	S000004887	0	S000000116	0	S000003574	0	S000002514	0	S000000040	1.5
S000000987	1.2	S000004078	1.5	S000001690	3	S000005522	0	S000000116	0	S000005780	0	S000003630	0	S000000657	0	S000004078	1.5
S000001703	1.2	S000003110	1.5	S000002822	3	S000006321	0	S000005780	0	S000002371	0	S000000278	0	S000003128	0	S000003110	1.5
S000005908	1.2	S000003774	1.5	S000028423	3	S000028515	0	S000002371	0	S000002533	0	S000003194	0	S000005358	0	S000003774	1.5
S000000610	1.2	S000000208	1.5	S000000040	3	S000004120	0	S000002533	0	S000003337	0	S000001299	0	S000001040	0	S000000208	1.5
S000000623	1.2	S000000447	1.5	S000004078	3	S000002512	0	S000003337	0	S000001548	0	S000003114	0	S000004733	0	S000000447	1.5
S000006353	1.2	S000004540	1.5	S000003110	3	S000002514	0	S000001548	0	S000004643	0	S000003281	0	S000001008	0	S000004540	1.5
S000005444	1.2	S000006165	1.5	S000003774	3	S000000657	0	S000004643	0	S000002230	0	S000003094	0	S000004435	0	S000006165	1.5
S000005223	1.2	S000001938	1.5	S000000208	3	S000003128	0	S000002230	0	S000002978	0	S000002912	0	S000000414	0	S000001938	1.5
S000005575	1.2	S000001648	1.5	S000000447	3	S000005358	0	S000002978	0	S000001182	0	S000005978	0	S000000615	0	S000001648	1.5
S000001534	1.2	S000005363	1.5	S000004540	3	S000001040	0	S000001182	0	S000005090	0	S000000074	0	S000003587	0	S000005363	1.5
S000006013	1.2	S000003633	1.5	S000006165	3	S000004733	0	S000005090	0	S000007651	0	S000000423	0	S000003575	0	S000003633	1.5
S000002497	1.2	S000004887	1.5	S000001938	3	S000001008	0	S000007651	0	S000002927	0	S000000491	0	S000003353	0	S000004887	1.5
S000003258	1.2	S000000116	1.5	S000001648	3	S000004435	0	S000002927	0	S000002700	0	S000028818	0	S000005086	0	S000000116	1.5
S000001036	1.2	S000005675	1.5	S000005363	3	S000000414	0	S000002700	0	S000000762	0	S000000508	0	S000006342	0	S000005675	1.5
S000005138	1.2	S000002533	1.5	S000003633	3	S000000615	0	S000000762	0	S000001289	0	S000002425	0	S000004756	0	S000002533	1.5
S000005227	1.2	S000004643	1.5	S000004887	3	S000003587	0	S000001289	0	S000003168	0	S000028653	0	S000002867	0	S000004643	1.5
S000001843	1.2	S000001182	1.5	S000000116	3	S000003575	0	S000003168	0	S000001937	0	S000001018	0	S000000500	0	S000001182	1.5
S000004964	1.2	S000001285	1.5	S000005675	3	S000003353	0	S000001937	0	S000002129	0	S000001087	0	S000003445	0	S000001285	1.5
S000002828	1.2	S000005090	1.5	S000002533	3	S000005086	0	S000002129	0	S000000005	0	S000001120	0	S000006402	0	S000005090	1.5
S000004324	1.2	S000007651	1.5	S000004643	3	S000006342	0	S000000005	0	S000002176	0	S000113587	0	S000001661	0	S000007651	1.5
S000001808	1.2	S000004599	1.5	S000001182	3	S000004756	0	S000002176	0	S000005542	0	S000001291	0	S000001692	0	S000004599	1.5
S000002365	1.2	S000002464	1.5	S000001285	3	S000002867	0	S000005542	0	S000002970	0	S000003565	0	S000002990	0	S000002464	1.5
S000002774	1.2	S000000762	1.5	S000005090	3	S000000500	0	S000002970	0	S000006241	0	S000003654	0	S000001759	0	S000000762	1.5
S000001908	1.2	S000001937	1.5	S000007651	3	S000003445	0	S000006241	0	S000000727	0	S000003668	0	S000003665	0	S000001937	1.5
S000005892	1.2	S000001152	1.5	S000004599	3	S000006402	0	S000000727	0	S000004913	0	S000003976	0	S000001068	0	S000001152	1.5
S000006405	1.2	S000002970	1.5	S000002464	3	S000001661	0	S000004913	0	S000002653	0	S000004799	0	S000000424	0	S000002970	1.5
S000001832	1.2	S000004197	1.5	S000000762	3	S000001692	0	S000002653	0	S000005971	0	S000004822	0	S000002377	0	S000004197	1.5
S000001702	1.2	S000004913	1.5	S000001937	3	S000002990	0	S000005971	0	S000001278	0	S000028710	0	S000001854	0	S000004913	1.5
S000005556	1.2	S000003495	1.5	S000001152	3	S000001759	0	S000001278	0	S000004473	0	S000005522	0	S000001827	0	S000003495	1.5
S000003531	1.2	S000000663	1.5	S000002970	3	S000003665	0	S000004473	0	S000002279	0	S000006321	0	S000002727	0	S000000663	1.5
S000003867	1.2	S000004957	1.5	S000004197	3	S000001068	0	S000002279	0	S000000274	0	S000028515	0	S000003885	0	S000004957	1.5
S000000244	1.2	S000000209	1.5	S000004913	3	S000000424	0	S000000274	0	S000004877	0	S000004120	0	S000003729	0	S000000209	1.5
S000005997	1.2	S000000730	1.5	S000003495	3	S000002377	0	S000004877	0	S000004815	0	S000002512	0	S000004142	0	S000000730	1.5
S000006110	1.2	S000004073	1.5	S000000663	3	S000001854	0	S000004815	0	S000000363	0	S000002514	0	S000004637	0	S000004073	1.5
S000003574	1.2	S000001522	1.5	S000004957	3	S000001827	0	S000000363	0	S000003292	0	S000000657	0	S000005264	0	S000001522	1.5
S000000278	1.2	S000000915	1.5	S000000209	3	S000002727	0	S000003292	0	S000001305	0	S000003128	0	S000005345	0	S000000915	1.5
S000001299	1.2	S000005605	1.5	S000000730	3	S000003885	0	S000001305	0	S000001084	0	S000005358	0	S000005039	0	S000005605	1.5
S000003114	1.2	S000004906	1.5	S000004073	3	S000003729	0	S000001084	0	S000002391	0	S000001040	0	S000005434	0	S000004906	1.5
S000002912	1.2	S000001517	1.5	S000001522	3	S000004142	0	S000002391	0	S000000209	0	S000004733	0	S000006231	0	S000001517	1.5
S000005978	1.2	S000004502	1.5	S000000915	3	S000004637	0	S000000209	0	S000007523	0	S000001008	0	S000006185	0	S000004502	1.5
S000000074	1.2	S000001769	1.5	S000005605	3	S000005264	0	S000007523	0	S000005448	0	S000004435	0	S000005181	0	S000001769	1.5
S000000423	1.2	S000004070	1.5	S000004906	3	S000005345	0	S000005448	0	S000006128	0	S000000414	0	S000003687	0	S000004070	1.5
S000028818	1.2	S000005182	1.5	S000001517	3	S000005039	0	S000006128	0	S000000730	0	S000000615	0	S000000511	0	S000005182	1.5
S000000508	1.2	S000006283	1.5	S000004502	3	S000005434	0	S000000730	0	S000005615	0	S000003587	0	S000007236	0	S000006283	1.5
S000002425	1.2	S000002365	1.5	S000001769	3	S000006231	0	S000005615	0	S000003805	0	S000003575	0	S000000665	0	S000002365	1.5
S000028653	1.2	S000002774	1.5	S000004070	3	S000006185	0	S000003805	0	S000000915	0	S000003353	0	S000001020	0	S000002774	1.5
S000001087	1.2	S000001908	1.5	S000005182	3	S000005181	0	S000000915	0	S000005605	0	S000005086	0	S000000532	0	S000001908	1.5
S000001120	1.2	S000005892	1.5	S000006283	3	S000003687	0	S000005605	0	S000004906	0	S000006342	0	S000003136	0	S000005892	1.5
S000113587	1.2	S000006405	1.5	S000002365	3	S000000511	0	S000004906	0	S000002775	0	S000004756	0	S000003742	0	S000006405	1.5
S000001291	1.2	S000001832	1.5	S000002774	3	S000007236	0	S000002775	0	S000002911	0	S000002867	0	S000003526	0	S000001832	1.5
S000003565	1.2	S000001702	1.5	S000001908	3	S000000665	0	S000002911	0	S000006167	0	S000000500	0	S000005521	0	S000001702	1.5
S000003654	1.2	S000005556	1.5	S000005892	3	S000001020	0	S000006167	0	S000003541	0	S000003445	0	S000000775	0	S000005556	1.5
S000003668	1.2	S000003531	1.5	S000006405	3	S000000532	0	S000003541	0	S000001517	0	S000006402	0	S000000701	0	S000003531	1.5
S000003976	1.2	S000003867	1.5	S000001832	3	S000003136	0	S000001517	0	S000002507	0	S000001661	0	S000004453	0	S000003867	1.5
S000004799	1.2	S000000244	1.5	S000001702	3	S000003742	0	S000002507	0	S000004070	0	S000001692	0	S000001874	0	S000000244	1.5
S000028710	1.2	S000005997	1.5	S000005556	3	S000003526	0	S000004070	0	S000001846	0	S000002990	0	S000002210	0	S000005997	1.5
S000005522	1.2	S000006110	1.5	S000003531	3	S000005521	0	S000001846	0	S000003719	0	S000001759	0	S000006077	0	S000006110	1.5
S000006321	1.2	S000003574	1.5	S000003867	3	S000000775	0	S000003719	0	S000002774	0	S000003665	0	S000002410	0	S000003574	1.5
S000028515	1.2	S000000278	1.5	S000000244	3	S000000701	0	S000002774	0	S000001908	0	S000001068	0	S000006343	0	S000000278	1.5
S000004120	1.2	S000001299	1.5	S000005997	3	S000004453	0	S000001908	0	S000006405	0	S000000424	0	S000028534	0	S000001299	1.5
S000002512	1.2	S000003114	1.5	S000006110	3	S000001874	0	S000006405	0	S000001832	0	S000002377	0	S000007233	0	S000003114	1.5
S000002514	1.2	S000002912	1.5	S000003574	3	S000002210	0	S000001832	0	S000001702	0	S000001854	0	S000001902	0	S000002912	1.5
S000000657	1.2	S000005978	1.5	S000000278	3	S000006077	0	S000001702	0	S000005556	0	S000001827	0	S000028638	0	S000005978	1.5
S000003128	1.2	S000000074	1.5	S000001299	3	S000002410	0	S000005556	0	S000003867	0	S000002727	0	S000087160	0	S000000074	1.5
S000001008	1.2	S000000423	1.5	S000003114	3	S000006343	0	S000003867	0	S000000244	0	S000003885	0	S000028548	0	S000000423	1.5
S000004435	1.2	S000028818	1.5	S000002912	3	S000028534	0	S000000244	0	S000000947	0	S000003729	0	S000028553	0	S000028818	1.5
S000000414	1.2	S000000508	1.5	S000005978	3	S000007233	0	S000000947	0	S000005997	0	S000004142	0	S000028651	0	S000000508	1.5
S000003587	1.2	S000002425	1.5	S000000074	3	S000001902	0	S000005997	0	S000006110	0	S000004637	0	S000028836	0	S000002425	1.5
S000003575	1.2	S000028653	1.5	S000000423	3	S000028638	0	S000006110	0	S000003574	0	S000005264	0	S000001322	0	S000028653	1.5
S000003353	1.2	S000001087	1.5	S000028818	3	S000087160	0	S000003574	0	S000003630	0	S000005345	0	S000028513	0	S000001087	1.5
S000005086	1.2	S000001120	1.5	S000000508	3	S000028548	0	S000003630	0	S000003194	0	S000005039	0	S000028522	0	S000001120	1.5
S000002867	1.2	S000113587	1.5	S000002425	3	S000028553	0	S000003194	0	S000001299	0	S000005434	0	S000003773	0	S000113587	1.5
S000000500	1.2	S000001291	1.5	S000028653	3	S000028651	0	S000001299	0	S000003114	0	S000006231	0	S000028558	0	S000001291	1.5
S000003445	1.2	S000003565	1.5	S000001087	3	S000028836	0	S000003114	0	S000003281	0	S000006185	0	S000028560	0	S000003565	1.5
S000006402	1.2	S000003654	1.5	S000001120	3	S000001322	0	S000003281	0	S000003094	0	S000005181	0	S000028571	0	S000003654	1.5
S000001661	1.2	S000003668	1.5	S000113587	3	S000028513	0	S000003094	0	S000005978	0	S000003687	0	S000028693	0	S000003668	1.5
S000001692	1.2	S000003976	1.5	S000001291	3	S000028522	0	S000005978	0	S000000074	0	S000000511	0	S000004858	0	S000003976	1.5
S000001759	1.2	S000004799	1.5	S000003565	3	S000003773	0	S000000074	0	S000000423	0	S000007236	0	S000005349	0	S000004799	1.5
S000003665	1.2	S000028710	1.5	S000003654	3	S000028558	0	S000000423	0	S000000491	0	S000000665	0	S000028526	0	S000028710	1.5
S000001068	1.2	S000005522	1.5	S000003668	3	S000028560	0	S000000491	0	S000028818	0	S000001020	0	S000028856	0	S000005522	1.5
S000000424	1.2	S000006321	1.5	S000003976	3	S000028571	0	S000028818	0	S000000508	0	S000000532	0	S000005794	0	S000006321	1.5
S000002377	1.2	S000028515	1.5	S000004799	3	S000028693	0	S000000508	0	S000002425	0	S000003136	0	S000122558	0	S000028515	1.5
S000001854	1.2	S000004120	1.5	S000028710	3	S000004858	0	S000002425	0	S000028653	0	S000003742	0	S000028725	0	S000004120	1.5
S000001827	1.2	S000002512	1.5	S000005522	3	S000005349	0	S000028653	0	S000001018	0	S000003526	0	S000005630	0	S000002512	1.5
S000002727	1.2	S000002514	1.5	S000006321	3	S000028526	0	S000001018	0	S000001087	0	S000005521	0	S000006361	0	S000002514	1.5
S000003885	1.2	S000000657	1.5	S000028515	3	S000028856	0	S000001087	0	S000001120	0	S000000775	0	S000003373	0	S000000657	1.5
S000003729	1.2	S000003128	1.5	S000004120	3	S000005794	0	S000001120	0	S000113587	0	S000000701	0	S000001194	0	S000003128	1.5
S000004142	1.2	S000001008	1.5	S000002512	3	S000122558	0	S000113587	0	S000001291	0	S000004453	0	S000003255	0	S000001008	1.5
S000004637	1.2	S000004435	1.5	S000002514	3	S000028725	0	S000001291	0	S000003565	0	S000001874	0	S000005680	0	S000004435	1.5
S000005345	1.2	S000000414	1.5	S000000657	3	S000005630	0	S000003565	0	S000003654	0	S000002210	0	S000005465	0	S000000414	1.5
S000005039	1.2	S000003587	1.5	S000003128	3	S000006361	0	S000003654	0	S000003668	0	S000006077	0	S000001713	0	S000003587	1.5
S000005434	1.2	S000003575	1.5	S000001008	3	S000003373	0	S000003668	0	S000003976	0	S000002410	0	S000006431	0	S000003575	1.5
S000006231	1.2	S000003353	1.5	S000004435	3	S000001194	0	S000003976	0	S000004799	0	S000006343	0	S000005678	0	S000003353	1.5
S000006185	1.2	S000005086	1.5	S000000414	3	S000003255	0	S000004799	0	S000004822	0	S000028534	0	S000004077	0	S000005086	1.5
S000005181	1.2	S000002867	1.5	S000003587	3	S000005680	0	S000004822	0	S000028710	0	S000007233	0	S000000409	0	S000002867	1.5
S000000665	1.2	S000000500	1.5	S000003575	3	S000005465	0	S000028710	0	S000005522	0	S000001902	0	S000000403	0	S000000500	1.5
S000001020	1.2	S000003445	1.5	S000003353	3	S000001713	0	S000005522	0	S000028515	0	S000028638	0	S000004974	0	S000003445	1.5
S000000532	1.2	S000006402	1.5	S000005086	3	S000006431	0	S000028515	0	S000004120	0	S000087160	0	S000005974	0	S000006402	1.5
S000003136	1.2	S000001661	1.5	S000002867	3	S000005678	0	S000004120	0	S000002512	0	S000028548	0	S000001347	0	S000001661	1.5
S000003742	1.2	S000001692	1.5	S000000500	3	S000004077	0	S000002512	0	S000002514	0	S000028553	0	S000001684	0	S000001692	1.5
S000003526	1.2	S000001759	1.5	S000003445	3	S000000409	0	S000002514	0	S000003128	0	S000028651	0	S000005342	0	S000001759	1.5
S000005521	1.2	S000003665	1.5	S000006402	3	S000000403	0	S000003128	0	S000005358	0	S000028836	0	S000000742	0	S000003665	1.5
S000000775	1.2	S000001068	1.5	S000001661	3	S000004974	0	S000005358	0	S000001040	0	S000001322	0	S000003375	0	S000001068	1.5
S000000701	1.2	S000000424	1.5	S000001692	3	S000005974	0	S000001040	0	S000004733	0	S000028513	0	S000005782	0	S000000424	1.5
S000004453	1.2	S000002377	1.5	S000001759	3	S000001347	0	S000004733	0	S000001008	0	S000028522	0	S000004047	0	S000002377	1.5
S000001874	1.2	S000001854	1.5	S000003665	3	S000001684	0	S000001008	0	S000004435	0	S000003773	0	S000001623	0	S000001854	1.5
S000002210	1.2	S000001827	1.5	S000001068	3	S000005342	0	S000004435	0	S000000414	0	S000028558	0	S000002158	0	S000001827	1.5
S000006077	1.2	S000002727	1.5	S000000424	3	S000000742	0	S000000414	0	S000000615	0	S000028560	0	S000006429	0	S000002727	1.5
S000028534	1.2	S000003885	1.5	S000002377	3	S000003375	0	S000000615	0	S000003587	0	S000028571	0	S000004027	0	S000003885	1.5
S000007233	1.2	S000003729	1.5	S000001854	3	S000005782	0	S000003587	0	S000003353	0	S000028693	0	S000001646	0	S000003729	1.5
S000001902	1.2	S000004142	1.5	S000001827	3	S000001623	0	S000003353	0	S000006342	0	S000004858	0	S000003696	0	S000004142	1.5
S000028638	1.2	S000004637	1.5	S000002727	3	S000002158	0	S000006342	0	S000004756	0	S000005349	0	S000003695	0	S000004637	1.5
S000087160	1.2	S000005345	1.5	S000003885	3	S000006429	0	S000004756	0	S000002867	0	S000028526	0	S000003710	0	S000005345	1.5
S000028548	1.2	S000005039	1.5	S000003729	3	S000004027	0	S000002867	0	S000000500	0	S000028856	0	S000000505	0	S000005039	1.5
S000028553	1.2	S000005434	1.5	S000004142	3	S000001646	0	S000000500	0	S000003445	0	S000005794	0	S000005716	0	S000005434	1.5
S000028651	1.2	S000006231	1.5	S000004637	3	S000003696	0	S000003445	0	S000006402	0	S000122558	0	S000028698	0	S000006231	1.5
S000028836	1.2	S000006185	1.5	S000005345	3	S000003695	0	S000006402	0	S000001661	0	S000028725	0	S000002779	0	S000006185	1.5
S000001322	1.2	S000005181	1.5	S000005039	3	S000003710	0	S000001661	0	S000001759	0	S000005630	0	S000006325	0	S000005181	1.5
S000028513	1.2	S000000665	1.5	S000005434	3	S000000505	0	S000001759	0	S000001068	0	S000006361	0	S000000366	0	S000000665	1.5
S000028522	1.2	S000001020	1.5	S000006231	3	S000005716	0	S000001068	0	S000000424	0	S000003373	0	S000028529	0	S000001020	1.5
S000028558	1.2	S000000532	1.5	S000006185	3	S000028698	0	S000000424	0	S000001827	0	S000001194	0	S000028535	0	S000000532	1.5
S000028560	1.2	S000003136	1.5	S000005181	3	S000002779	0	S000001827	0	S000002727	0	S000003255	0	S000005916	0	S000003136	1.5
S000028571	1.2	S000003742	1.5	S000000665	3	S000006325	0	S000002727	0	S000003885	0	S000005680	0	S000000766	0	S000003742	1.5
S000028693	1.2	S000003526	1.5	S000001020	3	S000000366	0	S000003885	0	S000003729	0	S000005465	0	S000001579	0	S000003526	1.5
S000004858	1.2	S000005521	1.5	S000000532	3	S000028529	0	S000003729	0	S000004142	0	S000001713	0	S000001956	0	S000005521	1.5
S000005349	1.2	S000000775	1.5	S000003136	3	S000028535	0	S000004142	0	S000004637	0	S000006431	0	S000003911	0	S000000775	1.5
S000028526	1.2	S000000701	1.5	S000003742	3	S000005916	0	S000004637	0	S000005264	0	S000005678	0	S000001186	0	S000000701	1.5
S000028856	1.2	S000004453	1.5	S000003526	3	S000000766	0	S000005264	0	S000005345	0	S000004077	0	S000000685	0	S000004453	1.5
S000005794	1.2	S000001874	1.5	S000005521	3	S000001579	0	S000005345	0	S000005039	0	S000000409	0	S000002942	0	S000001874	1.5
S000122558	1.2	S000002210	1.5	S000000775	3	S000001956	0	S000005039	0	S000005434	0	S000000403	0	S000005909	0	S000002210	1.5
S000028725	1.2	S000006077	1.5	S000000701	3	S000003911	0	S000005434	0	S000006185	0	S000004974	0	S000001254	0	S000006077	1.5
S000006361	1.2	S000028534	1.5	S000004453	3	S000001186	0	S000006185	0	S000005181	0	S000005974	0	S000004828	0	S000028534	1.5
S000001194	1.2	S000007233	1.5	S000001874	3	S000000685	0	S000005181	0	S000003687	0	S000001347	0	S000005390	0	S000007233	1.5
S000003255	1.2	S000001902	1.5	S000002210	3	S000002942	0	S000003687	0	S000000511	0	S000001684	0	S000005515	0	S000001902	1.5
S000005465	1.2	S000028638	1.5	S000006077	3	S000005909	0	S000000511	0	S000007236	0	S000005342	0	S000004608	0	S000028638	1.5
S000001713	1.2	S000087160	1.5	S000028534	3	S000001254	0	S000007236	0	S000000532	0	S000000742	0	S000003614	0	S000087160	1.5
S000006431	1.2	S000028548	1.5	S000007233	3	S000004828	0	S000000532	0	S000003136	0	S000003375	0	S000002484	0	S000028548	1.5
S000004077	1.2	S000028553	1.5	S000001902	3	S000005390	0	S000003136	0	S000003742	0	S000005782	0	S000001385	0	S000028553	1.5
S000001684	1.2	S000028651	1.5	S000028638	3	S000005515	0	S000003742	0	S000003526	0	S000004047	0	S000000952	0	S000028651	1.5
S000005342	1.2	S000028836	1.5	S000087160	3	S000004608	0	S000003526	0	S000005521	0	S000001623	0	S000000271	0	S000028836	1.5
S000000742	1.2	S000001322	1.5	S000028548	3	S000003614	0	S000005521	0	S000000775	0	S000002158	0	S000000813	0	S000001322	1.5
S000004027	1.2	S000028513	1.5	S000028553	3	S000002484	0	S000000775	0	S000000701	0	S000004027	0	S000003421	0	S000028513	1.5
S000001646	1.2	S000028522	1.5	S000028651	3	S000001385	0	S000000701	0	S000004453	0	S000001646	0	S000001810	0	S000028522	1.5
S000003696	1.2	S000028558	1.5	S000028836	3	S000000952	0	S000004453	0	S000001874	0	S000003696	0	S000005536	0	S000028558	1.5
S000003710	1.2	S000028560	1.5	S000001322	3	S000000271	0	S000001874	0	S000002210	0	S000003695	0	S000002207	0	S000028560	1.5
S000000505	1.2	S000028571	1.5	S000028513	3	S000000813	0	S000002210	0	S000006077	0	S000003710	0	S000003912	0	S000028571	1.5
S000028698	1.2	S000028693	1.5	S000028522	3	S000003421	0	S000006077	0	S000002410	0	S000000505	0	S000005271	0	S000028693	1.5
S000006325	1.2	S000004858	1.5	S000028558	3	S000001810	0	S000002410	0	S000028534	0	S000005716	0	S000005910	0	S000004858	1.5
S000028535	1.2	S000005349	1.5	S000028560	3	S000005536	0	S000028534	0	S000007233	0	S000028698	0	S000000059	0	S000005349	1.5
S000000766	1.2	S000028526	1.5	S000028571	3	S000002207	0	S000007233	0	S000001902	0	S000002779	0	S000001458	0	S000028526	1.5
S000000685	1.2	S000028856	1.5	S000028693	3	S000003912	0	S000001902	0	S000028638	0	S000006325	0	S000006051	0	S000028856	1.5
S000002942	1.2	S000005794	1.5	S000004858	3	S000005271	0	S000028638	0	S000087160	0	S000000366	0	S000001273	0	S000005794	1.5
S000005909	1.2	S000122558	1.5	S000005349	3	S000005910	0	S000087160	0	S000028548	0	S000028529	0	S000005535	0	S000122558	1.5
S000001254	1.2	S000028725	1.5	S000028526	3	S000000059	0	S000028548	0	S000028553	0	S000028535	0	S000005244	0	S000028725	1.5
S000005515	1.2	S000006361	1.5	S000028856	3	S000001458	0	S000028553	0	S000028651	0	S000005916	0	S000004030	0	S000006361	1.5
S000000952	1.2	S000001194	1.5	S000005794	3	S000006051	0	S000028651	0	S000028836	0	S000001385	0	S000004032	0	S000001194	1.5
S000001810	1.2	S000003255	1.5	S000122558	3	S000001273	0	S000028836	0	S000001322	0	S000002207	0	S000005740	0	S000003255	1.5
S000002207	1.2	S000005465	1.5	S000028725	3	S000005535	0	S000001322	0	S000028513	0	S000004921	0	S000005327	0	S000005465	1.5
S000005271	1.2	S000001713	1.5	S000006361	3	S000005244	0	S000028513	0	S000028522	0	S000002996	0	S000004921	0	S000001713	1.5
S000000059	1.2	S000006431	1.5	S000001194	3	S000004030	0	S000028522	0	S000003773	0	S000003511	0	S000002996	0	S000006431	1.5
S000001458	1.2	S000004077	1.5	S000003255	3	S000004032	0	S000003773	0	S000028558	0	S000005010	0	S000003511	0	S000004077	1.5
S000001273	1.2	S000001684	1.5	S000005465	3	S000005740	0	S000028558	0	S000028560	0	S000005773	0	S000005010	0	S000001684	1.5
S000005535	1.2	S000005342	1.5	S000001713	3	S000004100	0	S000028560	0	S000028571	0	S000003694	0	S000005773	0	S000005342	1.5
S000004030	1.2	S000000742	1.5	S000006431	3	S000004921	0	S000028571	0	S000028693	0	S000001647	0	S000001647	0	S000000742	1.5
S000004032	1.2	S000004027	1.5	S000004077	3	S000002996	0	S000028693	0	S000004858	0	S000005350	0	S000005350	0	S000004027	1.5
S000005740	1.2	S000001646	1.5	S000001684	3	S000003511	0	S000004858	0	S000028856	0	S000003514	0	S000003514	0	S000001646	1.5
S000004203	1.2	S000003696	1.5	S000005342	3	S000005010	0	S000028856	0	S000005794	0	S000004291	0	S000004291	0	S000003696	1.5
S000004894	0.9	S000003710	1.5	S000000742	3	S000005773	0	S000005794	0	S000122558	0	S000001277	0	S000001277	0	S000003710	1.5
S000005163	0.9	S000000505	1.5	S000004027	3	S000003694	0	S000122558	0	S000028725	0	S000001099	0	S000001099	0	S000000505	1.5
S000004451	0.9	S000005716	1.5	S000001646	3	S000001647	0	S000028725	0	S000003255	0	S000000297	0	S000000297	0	S000005716	1.5
S000002819	0.9	S000028698	1.5	S000003696	3	S000005350	0	S000003255	0	S000001713	0	S000002439	0	S000002439	0	S000028698	1.5
S000005618	0.9	S000006325	1.5	S000003710	3	S000003514	0	S000001713	0	S000006431	0	S000005104	0	S000005104	0	S000006325	1.5
S000001690	0.9	S000028529	1.5	S000000505	3	S000004291	0	S000006431	0	S000005678	0	S000004145	0	S000004145	0	S000028529	1.5
S000002822	0.9	S000028535	1.5	S000005716	3	S000001099	0	S000005678	0	S000000409	0	S000004147	0	S000004147	0	S000028535	1.5
S000028423	0.9	S000005916	1.5	S000028698	3	S000000297	0	S000000409	0	S000000403	0	S000004148	0	S000004148	0	S000005916	1.5
S000000040	0.9	S000000766	1.5	S000006325	3	S000002439	0	S000000403	0	S000001684	0	S000004150	0	S000004150	0	S000000766	1.5
S000003110	0.9	S000003911	1.5	S000028529	3	S000005104	0	S000001684	0	S000001623	0	S000004276	0	S000004276	0	S000003911	1.5
S000003774	0.9	S000001186	1.5	S000028535	3	S000004145	0	S000001623	0	S000002158	0	S000000641	0	S000000641	0	S000001186	1.5
S000000447	0.9	S000000685	1.5	S000005916	3	S000004147	0	S000002158	0	S000004027	0	S000004203	0	S000004203	0	S000000685	1.5
S000001938	0.9	S000002942	1.5	S000000766	3	S000004148	0	S000004027	0	S000001646	0	S000006044	0	S000006044	0	S000002942	1.5
S000005363	0.9	S000005909	1.5	S000003911	3	S000004150	0	S000001646	0	S000003696	0	S000003595	0	S000003595	0	S000005909	1.5
S000003633	0.9	S000001254	1.5	S000001186	3	S000004276	0	S000003696	0	S000003695	0	S000003974	0	S000003974	0	S000001254	1.5
S000004887	0.9	S000005515	1.5	S000000685	3	S000000641	0	S000003695	0	S000003710	0	S000005927	0	S000005927	0	S000005515	1.5
S000000116	0.9	S000003614	1.5	S000002942	3	S000004203	0	S000003710	0	S000000505	0	S000000185	0	S000000185	0	S000003614	1.5
S000002533	0.9	S000003764	1.5	S000005909	3	S000003595	0	S000000505	0	S000028698	0	S000000921	0	S000000921	0	S000003764	1.5
S000004643	0.9	S000000952	1.5	S000001254	3	S000003974	0	S000028698	0	S000006325	0	S000001350	0	S000001350	0	S000000952	1.5
S000001182	0.9	S000001810	1.5	S000005515	3	S000005927	0	S000006325	0	S000028535	0	S000000365	0	S000000365	0	S000001810	1.5
S000005090	0.9	S000005536	1.5	S000003614	3	S000000185	0	S000028535	0	S000001579	0	S000002692	0	S000002692	0	S000005536	1.5
S000007651	0.9	S000002207	1.5	S000003764	3	S000000921	0	S000001579	0	S000001956	0	S000004834	0	S000004834	0	S000002207	1.5
S000000762	0.9	S000003912	1.5	S000000952	3	S000001350	0	S000001956	0	S000003911	0	S000000411	0	S000000411	0	S000003912	1.5
S000001937	0.9	S000005271	1.5	S000001810	3	S000000365	0	S000003911	0	S000001186	0	S000000391	0	S000000391	0	S000005271	1.5
S000002970	0.9	S000005910	1.5	S000005536	3	S000002692	0	S000001186	0	S000003614	0	S000005421	0	S000005421	0	S000005910	1.5
S000004913	0.9	S000000059	1.5	S000002207	3	S000004834	0	S000003614	0	S000000271	0	S000002212	0	S000002212	0	S000000059	1.5
S000000209	0.9	S000001458	1.5	S000003912	3	S000000411	0	S000000271	0	S000000813	0	S000005270	0	S000005270	0	S000001458	1.5
S000000730	0.9	S000006051	1.5	S000005271	3	S000000391	0	S000000813	0	S000005536	0	S000004024	0	S000004024	0	S000006051	1.5
S000004073	0.9	S000001273	1.5	S000005910	3	S000005421	0	S000005536	0	S000002207	0	S000002281	0	S000002281	0	S000001273	1.5
S000001522	0.9	S000005535	1.5	S000000059	3	S000002212	0	S000002207	0	S000003912	0	S000028508	0	S000028508	0	S000005535	1.5
S000000915	0.9	S000004030	1.5	S000001458	3	S000005270	0	S000003912	0	S000005910	0	S000000753	0	S000000753	0	S000004030	1.5
S000005605	0.9	S000004032	1.5	S000006051	3	S000004024	0	S000005910	0	S000006051	0	S000006155	0	S000006155	0	S000004032	1.5
S000004906	0.9	S000005740	1.5	S000001273	3	S000002281	0	S000006051	0	S000005327	0	S000000497	0	S000000497	0	S000005740	1.5
S000001517	0.9	S000005327	1.5	S000005535	3	S000028508	0	S000002996	0	S000002996	0	S000000574	0	S000000574	0	S000005327	1.5
S000004502	0.9	S000005773	1.5	S000004030	3	S000000753	0	S000001647	0	S000001647	0	S000001813	0	S000001813	0	S000005773	1.5
S000001769	0.9	S000005104	1.5	S000004032	3	S000006155	0	S000001099	0	S000001099	0	S000005489	0	S000005489	0	S000005104	1.5
S000004070	0.9	S000004145	1.5	S000005740	3	S000000497	0	S000002439	0	S000002439	0	S000000445	0	S000000445	0	S000004145	1.5
S000005182	0.9	S000004147	1.5	S000005327	3	S000000574	0	S000004203	0	S000004203	0	S000002339	0	S000002339	0	S000004147	1.5
S000006283	0.9	S000004148	1.5	S000005773	3	S000001813	0	S000003595	0	S000003595	0	S000002760	0	S000002760	0	S000004148	1.5
S000005716	0.9	S000004150	1.5	S000005104	3	S000005489	0	S000000185	0	S000000185	0	S000004480	0	S000004480	0	S000004150	1.5
S000028529	0.9	S000000641	1.5	S000004145	3	S000000445	0	S000000921	0	S000000921	0	S000005344	0	S000005344	0	S000000641	1.5
S000005916	0.9	S000004203	1.5	S000004147	3	S000002339	0	S000001350	0	S000001350	0	S000005379	0	S000005379	0	S000004203	1.5
S000005773	0.9	S000003595	1.5	S000004148	3	S000002760	0	S000000365	0	S000000365	0	S000006083	0	S000006083	0	S000003595	1.5
S000005104	0.9	S000003974	1.5	S000004150	3	S000004480	0	S000002692	0	S000002692	0	S000001658	0	S000001658	0	S000003974	1.5
S000004145	0.9	S000000185	1.5	S000000641	3	S000005344	0	S000004834	0	S000004834	0	S000001420	0	S000001420	0	S000000185	1.5
S000004147	0.9	S000000921	1.5	S000004203	3	S000005379	0	S000000411	0	S000000411	0	S000003708	0	S000003708	0	S000000921	1.5
S000004148	0.9	S000004834	1.5	S000003595	3	S000006083	0	S000000391	0	S000000391	0	S000003338	0	S000003338	0	S000004834	1.5
S000004150	0.9	S000002212	1.5	S000003974	3	S000001658	0	S000005421	0	S000005421	0	S000003991	0	S000003991	0	S000002212	1.5
S000000641	0.9	S000004024	1.5	S000000185	3	S000001420	0	S000005270	0	S000005270	0	S000001070	0	S000001070	0	S000004024	1.5
S000000240	0.6	S000028508	1.5	S000000921	3	S000003708	0	S000002281	0	S000002281	0	S000004290	0	S000004290	0	S000028508	1.5
S000006142	0.6	S000000497	1.5	S000004834	3	S000003338	0	S000028508	0	S000028508	0	S000002860	0	S000002860	0	S000000497	1.5
S000003107	0.6	S000000574	1.5	S000002212	3	S000003991	0	S000000753	0	S000000753	0	S000001607	0	S000001607	0	S000000574	1.5
S000004669	0.6	S000001813	1.5	S000004024	3	S000001070	0	S000006155	0	S000006155	0	S000005745	0	S000005745	0	S000001813	1.5
S000004078	0.6	S000000445	1.5	S000028508	3	S000004290	0	S000002339	0	S000002339	0	S000004999	0	S000004999	0	S000000445	1.5
S000000208	0.6	S000002339	1.5	S000000497	3	S000002860	0	S000002760	0	S000002760	0	S000001174	0	S000001174	0	S000002339	1.5
S000004540	0.6	S000005379	1.5	S000000574	3	S000001607	0	S000004480	0	S000004480	0	S000002168	0	S000002168	0	S000005379	1.5
S000006165	0.6	S000001658	1.5	S000001813	3	S000005745	0	S000005344	0	S000005344	0	S000002204	0	S000002204	0	S000001658	1.5
S000001648	0.6	S000001420	1.5	S000000445	3	S000004999	0	S000005379	0	S000005379	0	S000002670	0	S000002670	0	S000001420	1.5
S000005675	0.6	S000001070	1.5	S000002339	3	S000002168	0	S000006083	0	S000006083	0	S000005161	0	S000005161	0	S000001070	1.5
S000001285	0.6	S000005745	1.5	S000005379	3	S000002204	0	S000001658	0	S000001658	0	S000001245	0	S000001245	0	S000005745	1.5
S000001152	0.6	S000004999	1.5	S000001658	3	S000002670	0	S000001420	0	S000001420	0	S000006230	0	S000006230	0	S000004999	1.5
S000004197	0.6	S000005161	1.5	S000001420	3	S000005161	0	S000002168	0	S000002168	0	S000000490	0	S000000490	0	S000005161	1.5
S000003495	0.6	S000001245	1.5	S000001070	3	S000001245	0	S000002204	0	S000002204	0	S000006075	0	S000006075	0	S000001245	1.5
S000000663	0.6	S000006230	1.5	S000005745	3	S000006230	0	S000002670	0	S000002670	0	S000004912	0	S000004912	0	S000006230	1.5
S000004957	0.6	S000006075	1.5	S000004999	3	S000000490	0	S000005161	0	S000005161	0	S000000786	0	S000000786	0	S000006075	1.5
